# Supplementary material for: Circulation and Evolution of SARS-CoV-2 in India: Let the Data Speak
Source: Viruses. 2021 Nov 8;13(11):2238. doi: 10.3390/v13112238 (PMC8619538; doi:10.3390/v13112238)
Supplement: Supplementary file 1 [file viruses-13-02238-s001.zip]

Archive with 11 entries (11 files):
- Supplementary file 1.xlsx
- Supplementary file 10.xlsx
- Supplementary file 2.txt
- Supplementary file 3.xlsx
- Supplementary file 4.xlsx
- Supplementary file 5.xlsx
- Supplementary file 6.jpg
- Supplementary file 7.pdf
- Supplementary file 8.xlsx
- Supplementary file 9.xlsx
- Supplementary files.txt
