# Supplementary material for: Circulation and Evolution of SARS-CoV-2 in India: Let the Data Speak
Source: Viruses. 2021 Nov 8;13(11):2238. doi: 10.3390/v13112238 (PMC8619538; doi:10.3390/v13112238)
Supplement: Supplementary file 1 [file viruses-13-02238-s001.zip › Supplementary file 1.xlsx]

## Sheet: Dataset_1
Accession ID	Location	Date	Variant
EPI_ISL_1055768	Maharashtra-State	2020-03	Others
EPI_ISL_1192076	Himachal Pradesh-State	2020-07	Others
EPI_ISL_1192077	Andhra Pradesh-State	2020-06	Others
EPI_ISL_1192078	Andhra Pradesh-State	2020-06	Others
EPI_ISL_1192079	Himachal Pradesh-State	2020-08	Others
EPI_ISL_1192080	Andhra Pradesh-State	2020-08	Others
EPI_ISL_1192081	Andhra Pradesh-State	2020-08	Others
EPI_ISL_1192082	Andhra Pradesh-State	2020-06	Others
EPI_ISL_1192083	Andhra Pradesh-State	2020-06	Others
EPI_ISL_1192084	Andhra Pradesh-State	2020-08	Others
EPI_ISL_1192085	Telangana-State	2020-05	Others
EPI_ISL_1192086	Telangana-State	2020-07	Others
EPI_ISL_1192087	Telangana-State	2020-07	Others
EPI_ISL_1192088	Telangana-State	2020-07	Others
EPI_ISL_1192089	Telangana-State	2020-08	Others
EPI_ISL_1192090	Telangana-State	2020-09	Others
EPI_ISL_1192091	Telangana-State	2020-04	Others
EPI_ISL_1192092	Himachal Pradesh-State	2020-08	Others
EPI_ISL_1192093	Andhra Pradesh-State	2020-08	Others
EPI_ISL_1192094	Andhra Pradesh-State	2020-06	Others
EPI_ISL_1192096	Telangana-State	2020-04	Others
EPI_ISL_1192097	Telangana-State	2020-07	Others
EPI_ISL_1192098	Himachal Pradesh-State	2020-08	Others
EPI_ISL_1192099	Himachal Pradesh-State	2020-08	Others
EPI_ISL_1372007	Odisha-State	2020-12	Others
EPI_ISL_1372008	Odisha-State	2020-11	Others
EPI_ISL_1372009	Bihar-State	2021-02	Others
EPI_ISL_1380338	Telangana-State	2020-12	Others
EPI_ISL_1380339	Telangana-State	2020-12	Others
EPI_ISL_1380340	Telangana-State	2020-12	Others
EPI_ISL_1380344	Telangana-State	2020-12	Others
EPI_ISL_1380345	Telangana-State	2020-12	Others
EPI_ISL_1380346	Telangana-State	2020-12	Others
EPI_ISL_1380347	Telangana-State	2020-12	Others
EPI_ISL_1380348	Telangana-State	2020-12	Others
EPI_ISL_1380349	Telangana-State	2020-12	Others
EPI_ISL_1380350	Telangana-State	2020-12	Others
EPI_ISL_1380351	Telangana-State	2020-12	Others
EPI_ISL_1380352	Telangana-State	2020-12	Others
EPI_ISL_1380353	Telangana-State	2020-12	Others
EPI_ISL_1380354	Telangana-State	2020-12	Others
EPI_ISL_1380355	Telangana-State	2020-12	Others
EPI_ISL_1380356	Telangana-State	2020-12	Others
EPI_ISL_1380357	Telangana-State	2020-12	Others
EPI_ISL_1380358	Telangana-State	2020-12	Others
EPI_ISL_1380359	Telangana-State	2020-12	Others
EPI_ISL_1380360	Telangana-State	2020-12	Others
EPI_ISL_1380361	Telangana-State	2020-12	Others
EPI_ISL_1380362	Telangana-State	2020-12	Others
EPI_ISL_1380363	Telangana-State	2020-12	Others
EPI_ISL_1380364	Telangana-State	2020-12	Others
EPI_ISL_1380365	Telangana-State	2020-12	Others
EPI_ISL_1380366	Telangana-State	2020-12	Others
EPI_ISL_1380367	Telangana-State	2020-12	Others
EPI_ISL_1380368	Telangana-State	2020-12	Others
EPI_ISL_1380369	Telangana-State	2020-12	Others
EPI_ISL_1380370	Telangana-State	2020-12	Others
EPI_ISL_1380371	Telangana-State	2020-12	Others
EPI_ISL_1380372	Telangana-State	2020-12	Others
EPI_ISL_1380373	Telangana-State	2020-12	Others
EPI_ISL_1380374	Telangana-State	2020-12	Others
EPI_ISL_1380375	Telangana-State	2020-12	Others
EPI_ISL_1380376	Telangana-State	2020-12	Others
EPI_ISL_1380377	Telangana-State	2020-12	Others
EPI_ISL_1380378	Telangana-State	2020-12	Others
EPI_ISL_1380379	Telangana-State	2020-12	Others
EPI_ISL_1380380	Telangana-State	2020-12	Others
EPI_ISL_1380381	Telangana-State	2020-12	Others
EPI_ISL_1380382	Telangana-State	2020-12	Others
EPI_ISL_1380383	Telangana-State	2020-12	Others
EPI_ISL_1380384	Telangana-State	2020-12	Others
EPI_ISL_1380385	Telangana-State	2020-12	Others
EPI_ISL_1380386	Telangana-State	2020-12	Others
EPI_ISL_1380387	Telangana-State	2020-12	Others
EPI_ISL_1380388	Telangana-State	2020-12	Others
EPI_ISL_1380389	Telangana-State	2020-12	Others
EPI_ISL_1380390	Telangana-State	2020-12	Others
EPI_ISL_1380391	Telangana-State	2020-12	Others
EPI_ISL_1380392	Telangana-State	2020-12	Others
EPI_ISL_1380393	Telangana-State	2020-12	Others
EPI_ISL_1380394	Telangana-State	2020-12	Others
EPI_ISL_1380395	Telangana-State	2020-12	Others
EPI_ISL_1380396	Telangana-State	2020-12	Others
EPI_ISL_1380397	Telangana-State	2020-12	Others
EPI_ISL_1380398	Telangana-State	2020-12	Others
EPI_ISL_1380399	Telangana-State	2020-12	Others
EPI_ISL_1380400	Telangana-State	2020-12	Others
EPI_ISL_1380401	Telangana-State	2020-12	Others
EPI_ISL_1380402	Telangana-State	2020-12	Others
EPI_ISL_1380403	Telangana-State	2020-12	Others
EPI_ISL_1380404	Telangana-State	2020-12	Others
EPI_ISL_1380405	Telangana-State	2020-12	Others
EPI_ISL_1380406	Telangana-State	2020-12	Others
EPI_ISL_1380407	Telangana-State	2020-12	Others
EPI_ISL_1380408	Telangana-State	2020-12	Others
EPI_ISL_1380409	Telangana-State	2020-12	Others
EPI_ISL_1380410	Telangana-State	2020-12	Others
EPI_ISL_1380411	Telangana-State	2020-12	Others
EPI_ISL_1380412	Telangana-State	2020-12	Others
EPI_ISL_1380413	Telangana-State	2020-12	Others
EPI_ISL_1380414	Telangana-State	2020-12	Others
EPI_ISL_1380415	Telangana-State	2020-12	Others
EPI_ISL_1380416	Telangana-State	2020-12	Others
EPI_ISL_1380417	Telangana-State	2020-12	Others
EPI_ISL_1380418	Telangana-State	2020-12	Others
EPI_ISL_1380419	Telangana-State	2020-12	Others
EPI_ISL_1380420	Telangana-State	2020-12	Others
EPI_ISL_1380421	Telangana-State	2020-12	Others
EPI_ISL_1380422	Telangana-State	2020-12	Others
EPI_ISL_1380423	Telangana-State	2020-12	Others
EPI_ISL_1380424	Telangana-State	2020-12	Others
EPI_ISL_1380425	Telangana-State	2020-12	Others
EPI_ISL_1380426	Telangana-State	2020-12	Others
EPI_ISL_1380427	Telangana-State	2020-12	Others
EPI_ISL_1380428	Telangana-State	2020-12	Others
EPI_ISL_1380429	Telangana-State	2020-12	Others
EPI_ISL_1380430	Telangana-State	2020-12	Others
EPI_ISL_1380431	Telangana-State	2020-12	Others
EPI_ISL_1380432	Telangana-State	2020-12	Others
EPI_ISL_1380433	Telangana-State	2020-12	Others
EPI_ISL_1380434	Telangana-State	2020-12	Others
EPI_ISL_1380435	Telangana-State	2020-12	Others
EPI_ISL_1380436	Telangana-State	2020-12	Others
EPI_ISL_1380437	Telangana-State	2020-12	Others
EPI_ISL_1380438	Telangana-State	2020-12	Others
EPI_ISL_1380439	Telangana-State	2020-12	Others
EPI_ISL_1380440	Telangana-State	2020-12	Others
EPI_ISL_1380441	Telangana-State	2020-12	Others
EPI_ISL_1380442	Telangana-State	2020-12	Others
EPI_ISL_1380443	Telangana-State	2020-12	Others
EPI_ISL_1380444	Telangana-State	2020-12	Others
EPI_ISL_1380445	Telangana-State	2020-12	Others
EPI_ISL_1380446	Telangana-State	2020-12	Others
EPI_ISL_1380447	Telangana-State	2020-12	Others
EPI_ISL_1380448	Telangana-State	2020-12	Others
EPI_ISL_1380449	Telangana-State	2020-12	Others
EPI_ISL_1380450	Telangana-State	2020-12	Others
EPI_ISL_1380451	Telangana-State	2020-12	Others
EPI_ISL_1380452	Telangana-State	2020-12	Others
EPI_ISL_1380453	Telangana-State	2020-12	Others
EPI_ISL_1380454	Telangana-State	2020-12	Others
EPI_ISL_1380455	Telangana-State	2020-12	Others
EPI_ISL_1380456	Telangana-State	2020-12	Others
EPI_ISL_1380457	Telangana-State	2020-12	Others
EPI_ISL_1380458	Telangana-State	2020-12	Others
EPI_ISL_1380459	Telangana-State	2020-12	Others
EPI_ISL_1380460	Telangana-State	2020-12	Others
EPI_ISL_1380461	Telangana-State	2020-12	Others
EPI_ISL_1380462	Telangana-State	2020-12	Others
EPI_ISL_1380463	Telangana-State	2020-12	Others
EPI_ISL_1380464	Telangana-State	2020-12	Others
EPI_ISL_1380465	Telangana-State	2020-12	Others
EPI_ISL_1380466	Telangana-State	2020-12	Others
EPI_ISL_1380467	Telangana-State	2020-12	Others
EPI_ISL_1380468	Telangana-State	2020-12	Others
EPI_ISL_1380469	Telangana-State	2020-12	Others
EPI_ISL_1380470	Telangana-State	2020-12	Others
EPI_ISL_1380471	Telangana-State	2020-12	Others
EPI_ISL_1380472	Telangana-State	2020-12	Others
EPI_ISL_1380473	Telangana-State	2020-12	Others
EPI_ISL_1380474	Telangana-State	2020-12	Others
EPI_ISL_1380475	Telangana-State	2020-12	Others
EPI_ISL_1380476	Telangana-State	2020-12	Others
EPI_ISL_1380477	Telangana-State	2020-12	Others
EPI_ISL_1380478	Telangana-State	2020-12	Others
EPI_ISL_1380479	Telangana-State	2020-12	Others
EPI_ISL_1380480	Telangana-State	2020-12	Others
EPI_ISL_1380481	Telangana-State	2020-12	Others
EPI_ISL_1380482	Telangana-State	2020-12	Others
EPI_ISL_1380483	Telangana-State	2020-12	Others
EPI_ISL_1380484	Telangana-State	2020-12	Others
EPI_ISL_1380485	Telangana-State	2020-12	Others
EPI_ISL_1380486	Telangana-State	2020-12	Others
EPI_ISL_1380487	Telangana-State	2020-12	Others
EPI_ISL_1380488	Telangana-State	2020-12	Others
EPI_ISL_1380489	Telangana-State	2020-12	Others
EPI_ISL_1380490	Telangana-State	2020-12	Others
EPI_ISL_1380491	Andhra Pradesh-State	2020-12	Others
EPI_ISL_1380492	Andhra Pradesh-State	2020-12	Others
EPI_ISL_1380493	Andhra Pradesh-State	2020-12	Others
EPI_ISL_1380494	Telangana-State	2020-12	Others
EPI_ISL_1380495	Telangana-State	2020-12	Others
EPI_ISL_1380496	Telangana-State	2020-12	Others
EPI_ISL_1380497	Telangana-State	2020-12	Others
EPI_ISL_1380498	Telangana-State	2020-12	Others
EPI_ISL_1419200	West Bengal-State	2020-09	Others
EPI_ISL_1419201	West Bengal-State	2020-09	Others
EPI_ISL_1419202	West Bengal-State	2020-10	Others
EPI_ISL_1419203	West Bengal-State	2020-04	Others
EPI_ISL_1419204	West Bengal-State	2021-02	Others
EPI_ISL_1419205	West Bengal-State	2021-01	Others
EPI_ISL_1419206	West Bengal-State	2021-01	Others
EPI_ISL_1419207	West Bengal-State	2021-01	Others
EPI_ISL_1419208	West Bengal-State	2021-01	Others
EPI_ISL_1419209	West Bengal-State	2021-01	Others
EPI_ISL_1419210	West Bengal-State	2021-01	Others
EPI_ISL_1419211	West Bengal-State	2021-01	Others
EPI_ISL_1419212	West Bengal-State	2021-01	Others
EPI_ISL_1419213	West Bengal-State	2021-01	Others
EPI_ISL_1419214	West Bengal-State	2021-01	Others
EPI_ISL_1419215	West Bengal-State	2021-01	Others
EPI_ISL_1419216	West Bengal-State	2021-01	Others
EPI_ISL_1419217	West Bengal-State	2021-01	Others
EPI_ISL_1419218	West Bengal-State	2021-01	Others
EPI_ISL_1419219	West Bengal-State	2021-01	Others
EPI_ISL_1419220	West Bengal-State	2021-01	Others
EPI_ISL_1419221	West Bengal-State	2021-02	Others
EPI_ISL_1419222	West Bengal-State	2021-01	Others
EPI_ISL_1419223	West Bengal-State	2021-01	Others
EPI_ISL_1419224	West Bengal-State	2021-01	Others
EPI_ISL_1419225	West Bengal-State	2021-01	Others
EPI_ISL_1419226	West Bengal-State	2020-12	Others
EPI_ISL_1419227	West Bengal-State	2020-12	Others
EPI_ISL_1419228	West Bengal-State	2020-11	Others
EPI_ISL_1419229	West Bengal-State	2021-02	Others
EPI_ISL_1419230	West Bengal-State	2020-12	Others
EPI_ISL_1419231	West Bengal-State	2020-12	Others
EPI_ISL_1419232	West Bengal-State	2020-12	Others
EPI_ISL_1419233	West Bengal-State	2020-12	Others
EPI_ISL_1419234	West Bengal-State	2021-02	Others
EPI_ISL_1419235	West Bengal-State	2021-02	Others
EPI_ISL_1419236	West Bengal-State	2020-12	Others
EPI_ISL_1419237	West Bengal-State	2020-12	Others
EPI_ISL_1419238	West Bengal-State	2020-12	Others
EPI_ISL_1419239	West Bengal-State	2020-12	Others
EPI_ISL_1419240	West Bengal-State	2020-12	Others
EPI_ISL_1419241	West Bengal-State	2020-12	Others
EPI_ISL_1419242	West Bengal-State	2020-12	Others
EPI_ISL_1419243	West Bengal-State	2020-12	Others
EPI_ISL_1419244	West Bengal-State	2020-12	Others
EPI_ISL_1419245	West Bengal-State	2020-12	Others
EPI_ISL_1419246	West Bengal-State	2020-12	Others
EPI_ISL_1419247	West Bengal-State	2020-12	Others
EPI_ISL_1419248	West Bengal-State	2020-12	Others
EPI_ISL_1419249	West Bengal-State	2020-12	Others
EPI_ISL_1419250	West Bengal-State	2021-02	Others
EPI_ISL_1419251	West Bengal-State	2021-01	Others
EPI_ISL_1419252	West Bengal-State	2020-11	Others
EPI_ISL_1419253	West Bengal-State	2020-11	Others
EPI_ISL_1419254	West Bengal-State	2020-11	Others
EPI_ISL_1419255	West Bengal-State	2020-09	Others
EPI_ISL_1419256	West Bengal-State	2020-09	Others
EPI_ISL_1419257	West Bengal-State	2020-09	Others
EPI_ISL_1419258	West Bengal-State	2020-09	Others
EPI_ISL_1419259	West Bengal-State	2020-09	Others
EPI_ISL_1419260	West Bengal-State	2020-09	Others
EPI_ISL_1419261	West Bengal-State	2020-10	Others
EPI_ISL_1419262	West Bengal-State	2020-10	Others
EPI_ISL_1419263	West Bengal-State	2020-10	Others
EPI_ISL_1419264	West Bengal-State	2020-10	Others
EPI_ISL_1419265	West Bengal-State	2020-10	Others
EPI_ISL_1419266	West Bengal-State	2020-10	Others
EPI_ISL_1419267	West Bengal-State	2020-10	Others
EPI_ISL_1419268	West Bengal-State	2020-10	Others
EPI_ISL_1419269	West Bengal-State	2020-10	Others
EPI_ISL_1419270	West Bengal-State	2020-10	Others
EPI_ISL_1419271	West Bengal-State	2020-10	Others
EPI_ISL_1419272	West Bengal-State	2020-10	Others
EPI_ISL_1419273	West Bengal-State	2020-10	Others
EPI_ISL_1419274	West Bengal-State	2020-10	Others
EPI_ISL_1419275	West Bengal-State	2020-10	Others
EPI_ISL_1419276	West Bengal-State	2020-10	Others
EPI_ISL_1419277	West Bengal-State	2020-10	Others
EPI_ISL_1419278	West Bengal-State	2020-10	Others
EPI_ISL_1419279	West Bengal-State	2020-10	Others
EPI_ISL_1419280	West Bengal-State	2020-10	Others
EPI_ISL_1419281	West Bengal-State	2020-10	Others
EPI_ISL_1419282	West Bengal-State	2020-10	Others
EPI_ISL_1419283	West Bengal-State	2020-10	Others
EPI_ISL_1419284	West Bengal-State	2020-10	Others
EPI_ISL_1419285	West Bengal-State	2020-10	Others
EPI_ISL_1419286	West Bengal-State	2020-10	Others
EPI_ISL_1419287	West Bengal-State	2020-10	Others
EPI_ISL_1419288	West Bengal-State	2020-10	Others
EPI_ISL_1419289	West Bengal-State	2020-10	Others
EPI_ISL_1419290	West Bengal-State	2020-10	Others
EPI_ISL_1419291	West Bengal-State	2021-02	Others
EPI_ISL_1419292	West Bengal-State	2021-02	Others
EPI_ISL_1419293	West Bengal-State	2021-02	Others
EPI_ISL_1419294	West Bengal-State	2020-11	Others
EPI_ISL_1419295	West Bengal-State	2021-02	Others
EPI_ISL_1419296	West Bengal-State	2021-02	Others
EPI_ISL_1419297	West Bengal-State	2021-02	Others
EPI_ISL_1419298	West Bengal-State	2021-02	Others
EPI_ISL_1419299	West Bengal-State	2020-08	Others
EPI_ISL_1419300	West Bengal-State	2020-09	Others
EPI_ISL_1419301	West Bengal-State	2020-09	Others
EPI_ISL_1419302	West Bengal-State	2020-09	Others
EPI_ISL_1419303	West Bengal-State	2020-09	Others
EPI_ISL_1419304	West Bengal-State	2020-09	Others
EPI_ISL_1419305	West Bengal-State	2020-09	Others
EPI_ISL_1419306	West Bengal-State	2020-09	Others
EPI_ISL_1419307	West Bengal-State	2020-09	Others
EPI_ISL_1419308	West Bengal-State	2020-09	Others
EPI_ISL_1419309	West Bengal-State	2020-09	Others
EPI_ISL_1419310	West Bengal-State	2020-09	Others
EPI_ISL_1419311	West Bengal-State	2020-09	Others
EPI_ISL_1419312	West Bengal-State	2020-09	Others
EPI_ISL_1419313	West Bengal-State	2020-09	Others
EPI_ISL_1419314	West Bengal-State	2020-09	Others
EPI_ISL_1419315	West Bengal-State	2020-09	Others
EPI_ISL_1419316	West Bengal-State	2020-09	Others
EPI_ISL_1419317	West Bengal-State	2020-09	Others
EPI_ISL_1419318	West Bengal-State	2020-09	Others
EPI_ISL_1419319	West Bengal-State	2020-09	Others
EPI_ISL_1419320	West Bengal-State	2020-09	Others
EPI_ISL_1419321	West Bengal-State	2020-09	Others
EPI_ISL_1419322	West Bengal-State	2020-09	Others
EPI_ISL_1419323	West Bengal-State	2020-09	Others
EPI_ISL_1419324	West Bengal-State	2020-09	Others
EPI_ISL_1419325	West Bengal-State	2020-09	Others
EPI_ISL_1419326	West Bengal-State	2020-09	Others
EPI_ISL_1419327	West Bengal-State	2020-09	Others
EPI_ISL_1419328	West Bengal-State	2020-09	Others
EPI_ISL_1419329	West Bengal-State	2020-09	Others
EPI_ISL_1419330	West Bengal-State	2020-09	Others
EPI_ISL_1419331	West Bengal-State	2020-09	Others
EPI_ISL_1419332	West Bengal-State	2020-09	Others
EPI_ISL_1419333	West Bengal-State	2020-09	Others
EPI_ISL_1419334	West Bengal-State	2020-09	Others
EPI_ISL_1419335	West Bengal-State	2020-09	Others
EPI_ISL_1419336	West Bengal-State	2020-09	Others
EPI_ISL_1419338	West Bengal-State	2020-09	Others
EPI_ISL_1419339	West Bengal-State	2020-09	Others
EPI_ISL_1419340	West Bengal-State	2020-09	Others
EPI_ISL_1419341	West Bengal-State	2020-09	Others
EPI_ISL_1419342	West Bengal-State	2020-09	Others
EPI_ISL_1419343	West Bengal-State	2020-09	Others
EPI_ISL_1419344	West Bengal-State	2020-09	Others
EPI_ISL_1419345	West Bengal-State	2020-09	Others
EPI_ISL_1419346	West Bengal-State	2020-09	Others
EPI_ISL_1419347	West Bengal-State	2021-02	Others
EPI_ISL_1419348	West Bengal-State	2021-02	Eta
EPI_ISL_1419349	West Bengal-State	2021-02	Eta
EPI_ISL_1543988	Maharashtra-State	2021-03	Others
EPI_ISL_1543989	Maharashtra-State	2021-03	Others
EPI_ISL_1543990	Maharashtra-State	2021-02	Others
EPI_ISL_1543991	Maharashtra-State	2021-02	Others
EPI_ISL_1543992	Maharashtra-State	2021-02	Kappa
EPI_ISL_1543993	Maharashtra-State	2021-02	Kappa
EPI_ISL_1543994	Maharashtra-State	2021-02	Kappa
EPI_ISL_1543995	Maharashtra-State	2021-02	Kappa
EPI_ISL_1543996	Maharashtra-State	2021-02	Others
EPI_ISL_1543997	Maharashtra-State	2021-02	Kappa
EPI_ISL_1543998	Maharashtra-State	2021-02	Others
EPI_ISL_1543999	Maharashtra-State	2021-02	Others
EPI_ISL_413522	Maharashtra-State	2020-01	Others
EPI_ISL_413523	Maharashtra-State	2020-01	Others
EPI_ISL_435074	West Bengal-State	2020-03	Others
EPI_ISL_435075	Tamil Nadu-State	2020-03	Others
EPI_ISL_435076	Haryana-State	2020-03	Others
EPI_ISL_435077	Maharashtra-State	2020-03	Others
EPI_ISL_435078	Tamil Nadu-State	2020-03	Others
EPI_ISL_435079	Tamil Nadu-State	2020-03	Others
EPI_ISL_435080	Tamil Nadu-State	2020-03	Others
EPI_ISL_435081	West Bengal-State	2020-03	Others
EPI_ISL_435082	Uttar Pradesh-State	2020-03	Others
EPI_ISL_435083	Tamil Nadu-State	2020-03	Others
EPI_ISL_435084	Tamil Nadu-State	2020-03	Others
EPI_ISL_435085	Maharashtra-State	2020-03	Others
EPI_ISL_435086	Maharashtra-State	2020-03	Others
EPI_ISL_435087	Tamil Nadu-State	2020-03	Others
EPI_ISL_435088	Odisha-State	2020-03	Others
EPI_ISL_435089	Andhra Pradesh-State	2020-03	Others
EPI_ISL_435091	Tamil Nadu-State	2020-03	Others
EPI_ISL_435092	Tamil Nadu-State	2020-03	Others
EPI_ISL_435093	Tamil Nadu-State	2020-03	Others
EPI_ISL_435094	Tamil Nadu-State	2020-03	Others
EPI_ISL_435095	Tamil Nadu-State	2020-03	Others
EPI_ISL_435096	Tamil Nadu-State	2020-03	Others
EPI_ISL_435097	West Bengal-State	2020-03	Others
EPI_ISL_435099	Uttar Pradesh-State	2020-03	Others
EPI_ISL_437536	West Bengal-State	2020-03	Others
EPI_ISL_437537	West Bengal-State	2020-03	Others
EPI_ISL_437538	West Bengal-State	2020-04	Others
EPI_ISL_437539	West Bengal-State	2020-04	Others
EPI_ISL_447050	Gujarat-State	2020-04	Others
EPI_ISL_447051	Gujarat-State	2020-04	Others
EPI_ISL_447052	Gujarat-State	2020-05	Others
EPI_ISL_447053	Gujarat-State	2020-04	Others
EPI_ISL_479500	Maharashtra-State	2020-04	Others
EPI_ISL_479501	Maharashtra-State	2020-04	Others
EPI_ISL_479502	Maharashtra-State	2020-04	Others
EPI_ISL_479503	Maharashtra-State	2020-04	Others
EPI_ISL_479504	Maharashtra-State	2020-04	Others
EPI_ISL_479505	Maharashtra-State	2020-04	Others
EPI_ISL_479506	Maharashtra-State	2020-04	Others
EPI_ISL_479507	Maharashtra-State	2020-04	Others
EPI_ISL_479508	Maharashtra-State	2020-04	Others
EPI_ISL_479509	Maharashtra-State	2020-04	Others
EPI_ISL_479510	Maharashtra-State	2020-04	Others
EPI_ISL_479511	Maharashtra-State	2020-05	Others
EPI_ISL_479512	Maharashtra-State	2020-05	Others
EPI_ISL_479513	Maharashtra-State	2020-05	Others
EPI_ISL_479514	Maharashtra-State	2020-05	Others
EPI_ISL_479515	Maharashtra-State	2020-05	Others
EPI_ISL_479516	Maharashtra-State	2020-05	Others
EPI_ISL_479517	Maharashtra-State	2020-05	Others
EPI_ISL_479518	Maharashtra-State	2020-05	Others
EPI_ISL_479519	Maharashtra-State	2020-05	Others
EPI_ISL_479520	Maharashtra-State	2020-05	Others
EPI_ISL_479521	Maharashtra-State	2020-05	Others
EPI_ISL_479522	Maharashtra-State	2020-05	Others
EPI_ISL_479523	Maharashtra-State	2020-05	Others
EPI_ISL_479524	Maharashtra-State	2020-05	Others
EPI_ISL_479525	Maharashtra-State	2020-05	Others
EPI_ISL_479526	Maharashtra-State	2020-05	Others
EPI_ISL_479527	Maharashtra-State	2020-05	Others
EPI_ISL_479528	Maharashtra-State	2020-05	Others
EPI_ISL_479529	Maharashtra-State	2020-05	Others
EPI_ISL_479530	Maharashtra-State	2020-05	Others
EPI_ISL_479531	Maharashtra-State	2020-05	Others
EPI_ISL_479532	Maharashtra-State	2020-05	Others
EPI_ISL_479533	Maharashtra-State	2020-05	Others
EPI_ISL_479534	Maharashtra-State	2020-05	Others
EPI_ISL_479535	Maharashtra-State	2020-05	Others
EPI_ISL_479536	Maharashtra-State	2020-05	Others
EPI_ISL_479537	Maharashtra-State	2020-05	Others
EPI_ISL_479538	Maharashtra-State	2020-05	Others
EPI_ISL_479539	Maharashtra-State	2020-05	Others
EPI_ISL_479540	Maharashtra-State	2020-05	Others
EPI_ISL_479541	Maharashtra-State	2020-05	Others
EPI_ISL_479542	Maharashtra-State	2020-05	Others
EPI_ISL_479543	Maharashtra-State	2020-05	Others
EPI_ISL_479544	Maharashtra-State	2020-05	Others
EPI_ISL_479545	Maharashtra-State	2020-05	Others
EPI_ISL_479546	Maharashtra-State	2020-05	Others
EPI_ISL_508330	Karnataka-State	2020-06	Others
EPI_ISL_508331	Karnataka-State	2020-06	Others
EPI_ISL_508332	Karnataka-State	2020-05	Others
EPI_ISL_508333	Karnataka-State	2020-06	Others
EPI_ISL_508334	Karnataka-State	2020-05	Others
EPI_ISL_508335	Karnataka-State	2020-06	Others
EPI_ISL_508336	Karnataka-State	2020-06	Others
EPI_ISL_508337	Karnataka-State	2020-06	Others
EPI_ISL_508338	West Bengal-State	2020-03	Others
EPI_ISL_508339	West Bengal-State	2020-04	Others
EPI_ISL_508340	West Bengal-State	2020-04	Others
EPI_ISL_508341	West Bengal-State	2020-04	Others
EPI_ISL_508342	West Bengal-State	2020-04	Others
EPI_ISL_508343	West Bengal-State	2020-04	Others
EPI_ISL_508344	West Bengal-State	2020-04	Others
EPI_ISL_508345	West Bengal-State	2020-04	Others
EPI_ISL_508346	West Bengal-State	2020-04	Others
EPI_ISL_508347	West Bengal-State	2020-04	Others
EPI_ISL_508348	West Bengal-State	2020-04	Others
EPI_ISL_508349	West Bengal-State	2020-03	Others
EPI_ISL_508350	West Bengal-State	2020-04	Others
EPI_ISL_508351	West Bengal-State	2020-04	Others
EPI_ISL_508352	West Bengal-State	2020-04	Others
EPI_ISL_508353	West Bengal-State	2020-04	Others
EPI_ISL_508354	West Bengal-State	2020-04	Others
EPI_ISL_508355	West Bengal-State	2020-04	Others
EPI_ISL_508356	West Bengal-State	2020-04	Others
EPI_ISL_508357	West Bengal-State	2020-04	Others
EPI_ISL_508358	West Bengal-State	2020-04	Others
EPI_ISL_508359	West Bengal-State	2020-04	Others
EPI_ISL_508360	West Bengal-State	2020-04	Others
EPI_ISL_508361	West Bengal-State	2020-04	Others
EPI_ISL_508362	West Bengal-State	2020-05	Others
EPI_ISL_508363	West Bengal-State	2020-05	Others
EPI_ISL_508364	West Bengal-State	2020-05	Others
EPI_ISL_508365	West Bengal-State	2020-05	Others
EPI_ISL_508366	West Bengal-State	2020-05	Others
EPI_ISL_508367	West Bengal-State	2020-05	Others
EPI_ISL_508368	West Bengal-State	2020-03	Others
EPI_ISL_508369	West Bengal-State	2020-05	Others
EPI_ISL_508370	West Bengal-State	2020-05	Others
EPI_ISL_508371	West Bengal-State	2020-05	Others
EPI_ISL_508372	West Bengal-State	2020-05	Others
EPI_ISL_508373	West Bengal-State	2020-05	Others
EPI_ISL_508374	West Bengal-State	2020-05	Others
EPI_ISL_508375	West Bengal-State	2020-05	Others
EPI_ISL_508376	West Bengal-State	2020-03	Others
EPI_ISL_508377	West Bengal-State	2020-05	Others
EPI_ISL_508378	West Bengal-State	2020-05	Others
EPI_ISL_508379	West Bengal-State	2020-05	Others
EPI_ISL_508380	West Bengal-State	2020-05	Others
EPI_ISL_508381	West Bengal-State	2020-05	Others
EPI_ISL_508382	West Bengal-State	2020-05	Others
EPI_ISL_508383	West Bengal-State	2020-05	Others
EPI_ISL_508384	West Bengal-State	2020-05	Others
EPI_ISL_508385	West Bengal-State	2020-04	Others
EPI_ISL_508386	West Bengal-State	2020-05	Others
EPI_ISL_508387	West Bengal-State	2020-05	Others
EPI_ISL_508388	West Bengal-State	2020-05	Others
EPI_ISL_508389	West Bengal-State	2020-05	Others
EPI_ISL_508390	West Bengal-State	2020-05	Others
EPI_ISL_508391	West Bengal-State	2020-05	Others
EPI_ISL_508392	West Bengal-State	2020-05	Others
EPI_ISL_508393	West Bengal-State	2020-05	Others
EPI_ISL_508394	West Bengal-State	2020-04	Others
EPI_ISL_508395	West Bengal-State	2020-05	Others
EPI_ISL_508396	West Bengal-State	2020-05	Others
EPI_ISL_508397	West Bengal-State	2020-05	Others
EPI_ISL_508398	West Bengal-State	2020-05	Others
EPI_ISL_508399	West Bengal-State	2020-05	Others
EPI_ISL_508450	West Bengal-State	2020-05	Others
EPI_ISL_508451	West Bengal-State	2020-05	Others
EPI_ISL_508452	West Bengal-State	2020-05	Others
EPI_ISL_508453	West Bengal-State	2020-05	Others
EPI_ISL_508454	West Bengal-State	2020-05	Others
EPI_ISL_508455	West Bengal-State	2020-05	Others
EPI_ISL_508456	West Bengal-State	2020-05	Others
EPI_ISL_508457	West Bengal-State	2020-05	Others
EPI_ISL_508458	West Bengal-State	2020-05	Others
EPI_ISL_508459	West Bengal-State	2020-05	Others
EPI_ISL_508460	West Bengal-State	2020-05	Others
EPI_ISL_508461	West Bengal-State	2020-05	Others
EPI_ISL_508462	West Bengal-State	2020-05	Others
EPI_ISL_508463	West Bengal-State	2020-05	Others
EPI_ISL_508464	West Bengal-State	2020-05	Others
EPI_ISL_508465	West Bengal-State	2020-05	Others
EPI_ISL_508466	West Bengal-State	2020-05	Others
EPI_ISL_508467	West Bengal-State	2020-05	Others
EPI_ISL_508468	West Bengal-State	2020-05	Others
EPI_ISL_508469	West Bengal-State	2020-05	Others
EPI_ISL_508470	West Bengal-State	2020-05	Others
EPI_ISL_508471	West Bengal-State	2020-05	Others
EPI_ISL_508472	West Bengal-State	2020-05	Others
EPI_ISL_508473	West Bengal-State	2020-05	Others
EPI_ISL_508474	West Bengal-State	2020-05	Others
EPI_ISL_508475	West Bengal-State	2020-05	Others
EPI_ISL_508476	West Bengal-State	2020-05	Others
EPI_ISL_508477	West Bengal-State	2020-05	Others
EPI_ISL_508478	West Bengal-State	2020-06	Others
EPI_ISL_508479	West Bengal-State	2020-05	Others
EPI_ISL_508480	West Bengal-State	2020-06	Others
EPI_ISL_508481	West Bengal-State	2020-05	Others
EPI_ISL_508482	West Bengal-State	2020-06	Others
EPI_ISL_508483	West Bengal-State	2020-06	Others
EPI_ISL_508484	West Bengal-State	2020-06	Others
EPI_ISL_508485	West Bengal-State	2020-06	Others
EPI_ISL_508486	West Bengal-State	2020-06	Others
EPI_ISL_508487	West Bengal-State	2020-06	Others
EPI_ISL_508488	West Bengal-State	2020-06	Others
EPI_ISL_508489	Haryana-State	2020-06	Others
EPI_ISL_508490	Haryana-State	2020-06	Others
EPI_ISL_508491	Haryana-State	2020-06	Others
EPI_ISL_508492	Haryana-State	2020-06	Others
EPI_ISL_508493	Haryana-State	2020-06	Others
EPI_ISL_508494	Haryana-State	2020-06	Others
EPI_ISL_508496	Haryana-State	2020-06	Others
EPI_ISL_508497	Haryana-State	2020-06	Others
EPI_ISL_508498	Haryana-State	2020-06	Others
EPI_ISL_508499	Haryana-State	2020-06	Others
EPI_ISL_508500	Haryana-State	2020-06	Others
EPI_ISL_508501	Haryana-State	2020-06	Others
EPI_ISL_508502	Haryana-State	2020-06	Others
EPI_ISL_508503	Haryana-State	2020-06	Others
EPI_ISL_508504	Haryana-State	2020-05	Others
EPI_ISL_508505	Haryana-State	2020-06	Others
EPI_ISL_508506	Haryana-State	2020-05	Others
EPI_ISL_508507	Haryana-State	2020-06	Others
EPI_ISL_508508	Haryana-State	2020-06	Others
EPI_ISL_508509	Haryana-State	2020-06	Others
EPI_ISL_516940	Uttar Pradesh-State	2020-04	Others
EPI_ISL_516941	Uttar Pradesh-State	2020-04	Others
EPI_ISL_516942	Uttar Pradesh-State	2020-04	Others
EPI_ISL_516943	Uttar Pradesh-State	2020-04	Others
EPI_ISL_516944	Uttar Pradesh-State	2020-04	Others
EPI_ISL_516945	Uttar Pradesh-State	2020-04	Others
EPI_ISL_516946	Uttar Pradesh-State	2020-03	Others
EPI_ISL_516947	Uttar Pradesh-State	2020-05	Others
EPI_ISL_516948	Uttar Pradesh-State	2020-03	Others
EPI_ISL_516949	Uttar Pradesh-State	2020-05	Others
EPI_ISL_516950	Uttar Pradesh-State	2020-05	Others
EPI_ISL_516951	Uttar Pradesh-State	2020-05	Others
EPI_ISL_516952	Uttar Pradesh-State	2020-05	Others
EPI_ISL_516953	Uttar Pradesh-State	2020-05	Others
EPI_ISL_516954	Uttar Pradesh-State	2020-05	Others
EPI_ISL_516955	Uttar Pradesh-State	2020-05	Others
EPI_ISL_516956	Uttar Pradesh-State	2020-05	Others
EPI_ISL_516957	Uttar Pradesh-State	2020-05	Others
EPI_ISL_516958	Uttar Pradesh-State	2020-05	Others
EPI_ISL_516959	Uttar Pradesh-State	2020-05	Others
EPI_ISL_516960	Uttar Pradesh-State	2020-04	Others
EPI_ISL_516961	Uttar Pradesh-State	2020-04	Others
EPI_ISL_516962	Uttar Pradesh-State	2020-04	Others
EPI_ISL_516963	Uttar Pradesh-State	2020-05	Others
EPI_ISL_516964	Uttar Pradesh-State	2020-05	Others
EPI_ISL_516965	Uttar Pradesh-State	2020-05	Others
EPI_ISL_516966	Uttar Pradesh-State	2020-05	Others
EPI_ISL_516967	Uttar Pradesh-State	2020-05	Others
EPI_ISL_516968	Uttar Pradesh-State	2020-05	Others
EPI_ISL_516969	Uttar Pradesh-State	2020-03	Others
EPI_ISL_516970	Uttar Pradesh-State	2020-04	Others
EPI_ISL_516971	Uttar Pradesh-State	2020-04	Others
EPI_ISL_516972	Uttar Pradesh-State	2020-04	Others
EPI_ISL_516973	Uttar Pradesh-State	2020-04	Others
EPI_ISL_516974	Uttar Pradesh-State	2020-03	Others
EPI_ISL_516975	Uttar Pradesh-State	2020-03	Others
EPI_ISL_516976	Uttar Pradesh-State	2020-05	Others
EPI_ISL_516977	Uttar Pradesh-State	2020-05	Others
EPI_ISL_516978	Uttar Pradesh-State	2020-05	Others
EPI_ISL_516979	Uttar Pradesh-State	2020-05	Others
EPI_ISL_516980	Uttar Pradesh-State	2020-05	Others
EPI_ISL_516981	Uttar Pradesh-State	2020-05	Others
EPI_ISL_516982	Uttar Pradesh-State	2020-05	Others
EPI_ISL_516983	Uttar Pradesh-State	2020-05	Others
EPI_ISL_516984	Uttar Pradesh-State	2020-05	Others
EPI_ISL_516985	Uttar Pradesh-State	2020-05	Others
EPI_ISL_516986	Uttar Pradesh-State	2020-05	Others
EPI_ISL_528809	Andhra Pradesh-State	2020-05	Others
EPI_ISL_528810	Telangana-State	2020-05	Others
EPI_ISL_528811	Telangana-State	2020-05	Others
EPI_ISL_528812	Telangana-State	2020-05	Others
EPI_ISL_528813	Telangana-State	2020-07	Others
EPI_ISL_528814	Telangana-State	2020-05	Others
EPI_ISL_528815	Telangana-State	2020-05	Others
EPI_ISL_528816	Telangana-State	2020-05	Others
EPI_ISL_528817	Telangana-State	2020-05	Others
EPI_ISL_528818	Telangana-State	2020-05	Others
EPI_ISL_528819	Telangana-State	2020-05	Others
EPI_ISL_528820	Telangana-State	2020-05	Others
EPI_ISL_528821	Telangana-State	2020-05	Others
EPI_ISL_528822	Telangana-State	2020-05	Others
EPI_ISL_528823	Telangana-State	2020-07	Others
EPI_ISL_528824	Telangana-State	2020-07	Others
EPI_ISL_528825	Telangana-State	2020-07	Others
EPI_ISL_528826	Telangana-State	2020-07	Others
EPI_ISL_528827	Telangana-State	2020-07	Others
EPI_ISL_528828	Telangana-State	2020-07	Others
EPI_ISL_528829	Telangana-State	2020-07	Others
EPI_ISL_528830	Telangana-State	2020-07	Others
EPI_ISL_528831	Telangana-State	2020-07	Others
EPI_ISL_528832	Telangana-State	2020-07	Others
EPI_ISL_528833	Telangana-State	2020-07	Others
EPI_ISL_528834	Telangana-State	2020-07	Others
EPI_ISL_528835	Telangana-State	2020-07	Others
EPI_ISL_528836	Telangana-State	2020-07	Others
EPI_ISL_528837	Telangana-State	2020-07	Others
EPI_ISL_528838	Telangana-State	2020-07	Others
EPI_ISL_528839	Telangana-State	2020-07	Others
EPI_ISL_528840	Telangana-State	2020-07	Others
EPI_ISL_528841	Telangana-State	2020-07	Others
EPI_ISL_528842	Telangana-State	2020-07	Others
EPI_ISL_528843	Telangana-State	2020-07	Others
EPI_ISL_528844	Telangana-State	2020-07	Others
EPI_ISL_528845	Telangana-State	2020-07	Others
EPI_ISL_528846	Telangana-State	2020-07	Others
EPI_ISL_528847	Telangana-State	2020-07	Others
EPI_ISL_528848	Telangana-State	2020-07	Others
EPI_ISL_539616	Telangana-State	2020-08	Others
EPI_ISL_539617	Telangana-State	2020-08	Others
EPI_ISL_539618	Telangana-State	2020-08	Others
EPI_ISL_539619	Telangana-State	2020-08	Others
EPI_ISL_539620	Telangana-State	2020-08	Others
EPI_ISL_539621	Telangana-State	2020-08	Others
EPI_ISL_539622	Telangana-State	2020-08	Others
EPI_ISL_539623	Telangana-State	2020-08	Others
EPI_ISL_539624	Telangana-State	2020-08	Others
EPI_ISL_539625	Telangana-State	2020-08	Others
EPI_ISL_539626	Telangana-State	2020-08	Others
EPI_ISL_539627	Telangana-State	2020-08	Others
EPI_ISL_539628	Telangana-State	2020-08	Others
EPI_ISL_539629	Telangana-State	2020-08	Others
EPI_ISL_539630	Telangana-State	2020-08	Others
EPI_ISL_539631	Telangana-State	2020-08	Others
EPI_ISL_539632	Telangana-State	2020-08	Others
EPI_ISL_539633	Telangana-State	2020-08	Others
EPI_ISL_539634	Telangana-State	2020-08	Others
EPI_ISL_539635	Telangana-State	2020-08	Others
EPI_ISL_539636	Telangana-State	2020-08	Others
EPI_ISL_539637	Telangana-State	2020-08	Others
EPI_ISL_539638	Telangana-State	2020-08	Others
EPI_ISL_539639	Telangana-State	2020-08	Others
EPI_ISL_539640	Telangana-State	2020-08	Others
EPI_ISL_539641	Telangana-State	2020-08	Others
EPI_ISL_539642	Telangana-State	2020-08	Others
EPI_ISL_539643	Telangana-State	2020-08	Others
EPI_ISL_539644	Telangana-State	2020-08	Others
EPI_ISL_539645	Telangana-State	2020-08	Others
EPI_ISL_539646	Telangana-State	2020-08	Others
EPI_ISL_539647	Telangana-State	2020-08	Others
EPI_ISL_539648	Telangana-State	2020-08	Others
EPI_ISL_539649	Telangana-State	2020-08	Others
EPI_ISL_539650	Telangana-State	2020-08	Others
EPI_ISL_539651	Telangana-State	2020-08	Others
EPI_ISL_539652	Telangana-State	2020-08	Others
EPI_ISL_539653	Telangana-State	2020-08	Others
EPI_ISL_539654	Telangana-State	2020-08	Others
EPI_ISL_539655	Telangana-State	2020-08	Others
EPI_ISL_539656	Telangana-State	2020-08	Others
EPI_ISL_539657	Telangana-State	2020-08	Others
EPI_ISL_539658	Telangana-State	2020-08	Others
EPI_ISL_539659	Telangana-State	2020-08	Others
EPI_ISL_539660	Telangana-State	2020-08	Others
EPI_ISL_539661	Telangana-State	2020-08	Others
EPI_ISL_539662	Telangana-State	2020-08	Others
EPI_ISL_539663	Telangana-State	2020-08	Others
EPI_ISL_539664	Telangana-State	2020-08	Others
EPI_ISL_539665	Telangana-State	2020-08	Others
EPI_ISL_539666	Telangana-State	2020-08	Others
EPI_ISL_539667	Telangana-State	2020-08	Others
EPI_ISL_539668	Telangana-State	2020-08	Others
EPI_ISL_539669	Telangana-State	2020-08	Others
EPI_ISL_539670	Telangana-State	2020-08	Others
EPI_ISL_539671	Telangana-State	2020-08	Others
EPI_ISL_539672	Telangana-State	2020-08	Others
EPI_ISL_539673	Telangana-State	2020-08	Others
EPI_ISL_539674	Telangana-State	2020-08	Others
EPI_ISL_539675	Telangana-State	2020-08	Others
EPI_ISL_539676	Telangana-State	2020-08	Others
EPI_ISL_539677	Telangana-State	2020-08	Others
EPI_ISL_539678	Telangana-State	2020-08	Others
EPI_ISL_539679	Telangana-State	2020-08	Others
EPI_ISL_539680	Telangana-State	2020-08	Others
EPI_ISL_539681	Telangana-State	2020-08	Others
EPI_ISL_539682	Telangana-State	2020-08	Others
EPI_ISL_539683	Telangana-State	2020-08	Others
EPI_ISL_539684	Telangana-State	2020-08	Others
EPI_ISL_539685	Telangana-State	2020-08	Others
EPI_ISL_539686	Telangana-State	2020-08	Others
EPI_ISL_539687	Telangana-State	2020-08	Others
EPI_ISL_539688	Telangana-State	2020-08	Others
EPI_ISL_539689	Telangana-State	2020-08	Others
EPI_ISL_539690	Telangana-State	2020-08	Others
EPI_ISL_539691	Telangana-State	2020-08	Others
EPI_ISL_539692	Telangana-State	2020-08	Others
EPI_ISL_539693	Telangana-State	2020-08	Others
EPI_ISL_539694	Telangana-State	2020-08	Others
EPI_ISL_539695	Telangana-State	2020-08	Others
EPI_ISL_539696	Telangana-State	2020-08	Others
EPI_ISL_539697	Telangana-State	2020-08	Others
EPI_ISL_539698	Telangana-State	2020-08	Others
EPI_ISL_539699	Telangana-State	2020-08	Others
EPI_ISL_636739	Uttarakhand-State	2020-07	Others
EPI_ISL_636742	Uttarakhand-State	2020-08	Others
EPI_ISL_636743	Uttarakhand-State	2020-08	Others
EPI_ISL_636744	Uttarakhand-State	2020-08	Others
EPI_ISL_636746	Uttarakhand-State	2020-08	Others
EPI_ISL_636747	Uttarakhand-State	2020-08	Others
EPI_ISL_636748	Uttarakhand-State	2020-07	Others
EPI_ISL_636750	Uttarakhand-State	2020-08	Others
EPI_ISL_636753	Uttarakhand-State	2020-08	Others
EPI_ISL_636756	Uttarakhand-State	2020-08	Others
EPI_ISL_636759	Uttarakhand-State	2020-07	Others
EPI_ISL_636772	Uttarakhand-State	2020-08	Others
EPI_ISL_636773	Uttarakhand-State	2020-08	Others
EPI_ISL_636781	Uttarakhand-State	2020-07	Others
EPI_ISL_636782	Uttarakhand-State	2020-08	Others
EPI_ISL_636784	Uttarakhand-State	2020-08	Others
EPI_ISL_636785	Uttarakhand-State	2020-08	Others
EPI_ISL_636786	Uttarakhand-State	2020-08	Others
EPI_ISL_636791	Uttarakhand-State	2020-08	Others
EPI_ISL_636792	Uttarakhand-State	2020-07	Others
EPI_ISL_636793	Uttarakhand-State	2020-08	Others
EPI_ISL_636794	Uttarakhand-State	2020-08	Others
EPI_ISL_636796	Uttarakhand-State	2020-08	Others
EPI_ISL_636797	Uttarakhand-State	2020-08	Others
EPI_ISL_636798	Uttarakhand-State	2020-08	Others
EPI_ISL_636799	Uttarakhand-State	2020-08	Others
EPI_ISL_700200	Maharashtra-State	2020-08	Others
EPI_ISL_700201	Maharashtra-State	2020-08	Others
EPI_ISL_700202	Maharashtra-State	2020-08	Others
EPI_ISL_700203	Maharashtra-State	2020-08	Others
EPI_ISL_700204	Maharashtra-State	2020-08	Others
EPI_ISL_700205	Maharashtra-State	2020-08	Others
EPI_ISL_700206	Maharashtra-State	2020-08	Others
EPI_ISL_700207	Maharashtra-State	2020-08	Others
EPI_ISL_700208	Maharashtra-State	2020-08	Others
EPI_ISL_700209	Maharashtra-State	2020-08	Others
EPI_ISL_700210	Maharashtra-State	2020-08	Others
EPI_ISL_700211	Maharashtra-State	2020-08	Others
EPI_ISL_700212	Maharashtra-State	2020-08	Others
EPI_ISL_700213	Maharashtra-State	2020-08	Others
EPI_ISL_700214	Maharashtra-State	2020-08	Others
EPI_ISL_700215	Maharashtra-State	2020-08	Others
EPI_ISL_700216	Maharashtra-State	2020-08	Others
EPI_ISL_700217	Maharashtra-State	2020-08	Others
EPI_ISL_700218	Maharashtra-State	2020-09	Others
EPI_ISL_700219	Maharashtra-State	2020-09	Others
EPI_ISL_700220	Maharashtra-State	2020-09	Others
EPI_ISL_700221	Maharashtra-State	2020-09	Others
EPI_ISL_700222	Maharashtra-State	2020-09	Others
EPI_ISL_700223	Maharashtra-State	2020-09	Others
EPI_ISL_700224	Maharashtra-State	2020-09	Others
EPI_ISL_700225	Maharashtra-State	2020-09	Others
EPI_ISL_700226	Maharashtra-State	2020-09	Others
EPI_ISL_700227	Maharashtra-State	2020-09	Others
EPI_ISL_700228	Maharashtra-State	2020-09	Others
EPI_ISL_700229	Maharashtra-State	2020-09	Others
EPI_ISL_700230	Maharashtra-State	2020-09	Others
EPI_ISL_700231	Maharashtra-State	2020-09	Others
EPI_ISL_700232	Maharashtra-State	2020-09	Others
EPI_ISL_700233	Maharashtra-State	2020-09	Others
EPI_ISL_700234	Maharashtra-State	2020-09	Others
EPI_ISL_700235	Maharashtra-State	2020-09	Others
EPI_ISL_700236	Maharashtra-State	2020-09	Others
EPI_ISL_700237	Maharashtra-State	2020-09	Others
EPI_ISL_700238	Maharashtra-State	2020-09	Others
EPI_ISL_700239	Maharashtra-State	2020-09	Others
EPI_ISL_700240	Maharashtra-State	2020-09	Others
EPI_ISL_700241	Maharashtra-State	2020-09	Others
EPI_ISL_700242	Maharashtra-State	2020-09	Others
EPI_ISL_700243	Maharashtra-State	2020-09	Others
EPI_ISL_700244	Maharashtra-State	2020-09	Others
EPI_ISL_700245	Maharashtra-State	2020-09	Others
EPI_ISL_700246	Maharashtra-State	2020-09	Others
EPI_ISL_700247	Maharashtra-State	2020-09	Others
EPI_ISL_700248	Maharashtra-State	2020-09	Others
EPI_ISL_700249	Maharashtra-State	2020-09	Others
EPI_ISL_700250	Maharashtra-State	2020-09	Others
EPI_ISL_700251	Maharashtra-State	2020-09	Others
EPI_ISL_700252	Maharashtra-State	2020-09	Others
EPI_ISL_700253	Maharashtra-State	2020-09	Others
EPI_ISL_700254	Maharashtra-State	2020-09	Others
EPI_ISL_700255	Maharashtra-State	2020-09	Others
EPI_ISL_700256	Maharashtra-State	2020-09	Others
EPI_ISL_700257	Maharashtra-State	2020-09	Others
EPI_ISL_700258	Maharashtra-State	2020-09	Others
EPI_ISL_700259	Maharashtra-State	2020-09	Others
EPI_ISL_700260	Maharashtra-State	2020-09	Others
EPI_ISL_700261	Maharashtra-State	2020-09	Others
EPI_ISL_700262	Maharashtra-State	2020-09	Others
EPI_ISL_700263	Maharashtra-State	2020-09	Others
EPI_ISL_700264	Maharashtra-State	2020-09	Others
EPI_ISL_700265	Maharashtra-State	2020-09	Others
EPI_ISL_700266	Maharashtra-State	2020-09	Others
EPI_ISL_700267	Maharashtra-State	2020-09	Others
EPI_ISL_700268	Maharashtra-State	2020-09	Others
EPI_ISL_700269	Maharashtra-State	2020-09	Others
EPI_ISL_700270	Maharashtra-State	2020-09	Others
EPI_ISL_700271	Maharashtra-State	2020-09	Others
EPI_ISL_700272	Maharashtra-State	2020-09	Others
EPI_ISL_700273	Maharashtra-State	2020-09	Others
EPI_ISL_700274	Maharashtra-State	2020-09	Others
EPI_ISL_700275	Maharashtra-State	2020-09	Others
EPI_ISL_700276	Maharashtra-State	2020-09	Others
EPI_ISL_700277	Maharashtra-State	2020-09	Others
EPI_ISL_700278	Maharashtra-State	2020-09	Others
EPI_ISL_700279	Maharashtra-State	2020-09	Others
EPI_ISL_700280	Maharashtra-State	2020-09	Others
EPI_ISL_700281	Maharashtra-State	2020-09	Others
EPI_ISL_700282	Maharashtra-State	2020-09	Others
EPI_ISL_700283	Maharashtra-State	2020-09	Others
EPI_ISL_700284	Maharashtra-State	2020-09	Others
EPI_ISL_700285	Maharashtra-State	2020-09	Others
EPI_ISL_700286	Maharashtra-State	2020-09	Others
EPI_ISL_700287	Maharashtra-State	2020-09	Others
EPI_ISL_700288	Maharashtra-State	2020-09	Others
EPI_ISL_700289	Maharashtra-State	2020-09	Others
EPI_ISL_700290	Maharashtra-State	2020-09	Others
EPI_ISL_700291	Maharashtra-State	2020-09	Others
EPI_ISL_700292	Maharashtra-State	2020-09	Others
EPI_ISL_700293	Maharashtra-State	2020-09	Others
EPI_ISL_700294	Maharashtra-State	2020-09	Others
EPI_ISL_700295	Maharashtra-State	2020-09	Others
EPI_ISL_700296	Maharashtra-State	2020-09	Others
EPI_ISL_700297	Maharashtra-State	2020-09	Others
EPI_ISL_700298	Maharashtra-State	2020-09	Others
EPI_ISL_700299	Maharashtra-State	2020-09	Others
EPI_ISL_910031	Telangana-State	2020-08	Others
EPI_ISL_910032	Telangana-State	2020-08	Others
EPI_ISL_910033	Telangana-State	2020-08	Others
EPI_ISL_910034	Telangana-State	2020-08	Others
EPI_ISL_910035	Telangana-State	2020-08	Others
EPI_ISL_910036	Telangana-State	2020-08	Others
EPI_ISL_910037	Telangana-State	2020-08	Others
EPI_ISL_910038	Telangana-State	2020-08	Others
EPI_ISL_910039	Telangana-State	2020-08	Others
EPI_ISL_910040	Telangana-State	2020-08	Others
EPI_ISL_910041	Telangana-State	2020-08	Others
EPI_ISL_910042	Telangana-State	2020-08	Others
EPI_ISL_910043	Telangana-State	2020-08	Others
EPI_ISL_910044	Telangana-State	2020-08	Others
EPI_ISL_910045	Telangana-State	2020-08	Others
EPI_ISL_910046	Telangana-State	2020-08	Others
EPI_ISL_910047	Telangana-State	2020-08	Others
EPI_ISL_910048	Telangana-State	2020-08	Others
EPI_ISL_910049	Telangana-State	2020-08	Others
EPI_ISL_910100	Telangana-State	2020-08	Others
EPI_ISL_910101	Telangana-State	2020-08	Others
EPI_ISL_910102	Telangana-State	2020-08	Others
EPI_ISL_910103	Telangana-State	2020-08	Others
EPI_ISL_910104	Telangana-State	2020-08	Others
EPI_ISL_910105	Telangana-State	2020-08	Others
EPI_ISL_910106	Telangana-State	2020-08	Others
EPI_ISL_910107	Telangana-State	2020-08	Others
EPI_ISL_910108	Telangana-State	2020-08	Others
EPI_ISL_910109	Telangana-State	2020-08	Others
EPI_ISL_910110	Telangana-State	2020-08	Others
EPI_ISL_910111	Telangana-State	2020-08	Others
EPI_ISL_910112	Telangana-State	2020-09	Others
EPI_ISL_910113	Telangana-State	2020-08	Others
EPI_ISL_910114	Telangana-State	2020-08	Others
EPI_ISL_910115	Telangana-State	2020-08	Others
EPI_ISL_910116	Telangana-State	2020-08	Others
EPI_ISL_910117	Telangana-State	2020-08	Others
EPI_ISL_910118	Telangana-State	2020-08	Others
EPI_ISL_910119	Telangana-State	2020-08	Others
EPI_ISL_910120	Telangana-State	2020-08	Others
EPI_ISL_910121	Telangana-State	2020-08	Others
EPI_ISL_910122	Telangana-State	2020-08	Others
EPI_ISL_910123	Telangana-State	2020-09	Others
EPI_ISL_910124	Telangana-State	2020-09	Others
EPI_ISL_910125	Telangana-State	2020-09	Others
EPI_ISL_910126	Telangana-State	2020-09	Others
EPI_ISL_910127	Telangana-State	2020-09	Others
EPI_ISL_910128	Telangana-State	2020-09	Others
EPI_ISL_910129	Telangana-State	2020-09	Others
EPI_ISL_910130	Telangana-State	2020-09	Others
EPI_ISL_910131	Telangana-State	2020-09	Others
EPI_ISL_910132	Telangana-State	2020-09	Others
EPI_ISL_910133	Telangana-State	2020-09	Others
EPI_ISL_910134	Telangana-State	2020-09	Others
EPI_ISL_910135	Telangana-State	2020-09	Others
EPI_ISL_910136	Telangana-State	2020-09	Others
EPI_ISL_910137	Telangana-State	2020-09	Others
EPI_ISL_910138	Telangana-State	2020-09	Others
EPI_ISL_910139	Telangana-State	2020-09	Others
EPI_ISL_910140	Telangana-State	2020-09	Others
EPI_ISL_910141	Telangana-State	2020-09	Others
EPI_ISL_910142	Telangana-State	2020-09	Others
EPI_ISL_910143	Telangana-State	2020-09	Others
EPI_ISL_910144	Telangana-State	2020-09	Others
EPI_ISL_910145	Telangana-State	2020-09	Others
EPI_ISL_910146	Telangana-State	2020-09	Others
EPI_ISL_910147	Telangana-State	2020-09	Others
EPI_ISL_910148	Telangana-State	2020-09	Others
EPI_ISL_910149	Telangana-State	2020-09	Others
EPI_ISL_910150	Telangana-State	2020-09	Others
EPI_ISL_910151	Telangana-State	2020-09	Others
EPI_ISL_910152	Telangana-State	2020-09	Others
EPI_ISL_910153	Telangana-State	2020-09	Others
EPI_ISL_910154	Telangana-State	2020-09	Others
EPI_ISL_910155	Telangana-State	2020-09	Others
EPI_ISL_910156	Telangana-State	2020-09	Others
EPI_ISL_910157	Telangana-State	2020-09	Others
EPI_ISL_910158	Telangana-State	2020-09	Others
EPI_ISL_910159	Telangana-State	2020-09	Others
EPI_ISL_910160	Telangana-State	2020-09	Others
EPI_ISL_910161	Telangana-State	2020-09	Others
EPI_ISL_910162	Telangana-State	2020-09	Others
EPI_ISL_910163	Telangana-State	2020-09	Others
EPI_ISL_910164	Telangana-State	2020-09	Others
EPI_ISL_910165	Telangana-State	2020-09	Others
EPI_ISL_910166	Telangana-State	2020-09	Others
EPI_ISL_910167	Telangana-State	2020-09	Others
EPI_ISL_910168	Telangana-State	2020-09	Others
EPI_ISL_910169	Telangana-State	2020-09	Others
EPI_ISL_1055383	Maharashtra-State	2020-03	Others
EPI_ISL_1055384	Maharashtra-State	2020-03	Others
EPI_ISL_1055770	Maharashtra-State	2020-03	Others
EPI_ISL_1055771	Maharashtra-State	2020-03	Others
EPI_ISL_1055785	Maharashtra-State	2020-03	Others
EPI_ISL_1055788	Maharashtra-State	2020-04	Others
EPI_ISL_1055789	Maharashtra-State	2020-04	Others
EPI_ISL_1063800	Odisha-State	2020-05	Others
EPI_ISL_1063801	Odisha-State	2020-08	Others
EPI_ISL_1063846	Odisha-State	2020-12	Others
EPI_ISL_1063847	Odisha-State	2020-12	Others
EPI_ISL_1063848	Odisha-State	2020-12	Others
EPI_ISL_1063849	Odisha-State	2020-12	Others
EPI_ISL_1063850	Odisha-State	2020-12	Others
EPI_ISL_1063851	Odisha-State	2020-12	Others
EPI_ISL_1063852	Odisha-State	2021-01	Others
EPI_ISL_1063853	Odisha-State	2021-01	Others
EPI_ISL_1063854	Odisha-State	2021-01	Others
EPI_ISL_1063855	Odisha-State	2020-12	Others
EPI_ISL_1063856	Odisha-State	2021-01	Others
EPI_ISL_1063857	Odisha-State	2021-01	Others
EPI_ISL_1063858	Odisha-State	2021-01	Others
EPI_ISL_1063859	Odisha-State	2021-01	Others
EPI_ISL_1063860	Odisha-State	2021-01	Others
EPI_ISL_1063861	Odisha-State	2021-01	Others
EPI_ISL_1063862	Odisha-State	2020-11	Others
EPI_ISL_1063863	Odisha-State	2020-11	Others
EPI_ISL_1063864	Odisha-State	2020-11	Others
EPI_ISL_1063865	Odisha-State	2020-11	Others
EPI_ISL_1063866	Odisha-State	2020-11	Others
EPI_ISL_1063867	Odisha-State	2020-11	Others
EPI_ISL_1063879	Odisha-State	2020-11	Others
EPI_ISL_1063880	Odisha-State	2020-11	Others
EPI_ISL_1063881	Odisha-State	2020-11	Others
EPI_ISL_1063882	Odisha-State	2020-11	Others
EPI_ISL_1063883	Odisha-State	2020-11	Others
EPI_ISL_1063884	Odisha-State	2020-11	Others
EPI_ISL_1063885	Odisha-State	2020-11	Others
EPI_ISL_1063886	Odisha-State	2020-11	Others
EPI_ISL_1063887	Odisha-State	2020-11	Others
EPI_ISL_1063888	Odisha-State	2020-11	Others
EPI_ISL_1063889	Odisha-State	2020-11	Others
EPI_ISL_1063890	Odisha-State	2020-11	Others
EPI_ISL_1063891	Odisha-State	2020-12	Others
EPI_ISL_1063892	Odisha-State	2020-12	Others
EPI_ISL_1063893	Odisha-State	2020-11	Others
EPI_ISL_1063894	Odisha-State	2020-11	Others
EPI_ISL_1063895	Odisha-State	2020-11	Others
EPI_ISL_1063896	Odisha-State	2020-10	Others
EPI_ISL_1063897	Odisha-State	2020-12	Others
EPI_ISL_1063898	Odisha-State	2020-12	Others
EPI_ISL_1063899	Odisha-State	2020-08	Others
EPI_ISL_1380200	Telangana-State	2020-10	Others
EPI_ISL_1380201	Telangana-State	2020-10	Others
EPI_ISL_1380202	Telangana-State	2020-10	Others
EPI_ISL_1380203	Telangana-State	2020-10	Others
EPI_ISL_1380204	Telangana-State	2020-10	Others
EPI_ISL_1380205	Telangana-State	2020-10	Others
EPI_ISL_1380206	Telangana-State	2020-10	Others
EPI_ISL_1380207	Telangana-State	2020-10	Others
EPI_ISL_1380208	Telangana-State	2020-10	Others
EPI_ISL_1380209	Telangana-State	2020-10	Others
EPI_ISL_1380210	Telangana-State	2020-10	Others
EPI_ISL_1380211	Telangana-State	2020-10	Others
EPI_ISL_1380212	Telangana-State	2020-10	Others
EPI_ISL_1380213	Telangana-State	2020-10	Others
EPI_ISL_1380214	Telangana-State	2020-10	Others
EPI_ISL_1380215	Telangana-State	2020-10	Others
EPI_ISL_1380216	Telangana-State	2020-10	Others
EPI_ISL_1380217	Telangana-State	2020-10	Others
EPI_ISL_1380218	Telangana-State	2020-10	Others
EPI_ISL_1380219	Telangana-State	2020-10	Others
EPI_ISL_1380220	Telangana-State	2020-11	Others
EPI_ISL_1380221	Telangana-State	2020-11	Others
EPI_ISL_1380222	Telangana-State	2020-11	Others
EPI_ISL_1380223	Telangana-State	2020-11	Others
EPI_ISL_1380224	Telangana-State	2020-11	Others
EPI_ISL_1380225	Telangana-State	2020-11	Others
EPI_ISL_1380226	Telangana-State	2020-11	Others
EPI_ISL_1380227	Telangana-State	2020-11	Others
EPI_ISL_1380228	Telangana-State	2020-11	Others
EPI_ISL_1380229	Telangana-State	2020-11	Others
EPI_ISL_1380230	Telangana-State	2020-11	Others
EPI_ISL_1380231	Telangana-State	2020-11	Others
EPI_ISL_1380232	Telangana-State	2020-11	Others
EPI_ISL_1380233	Telangana-State	2020-11	Others
EPI_ISL_1380234	Telangana-State	2020-11	Others
EPI_ISL_1380235	Telangana-State	2020-11	Others
EPI_ISL_1380236	Telangana-State	2020-11	Others
EPI_ISL_1380237	Telangana-State	2020-11	Others
EPI_ISL_1380238	Telangana-State	2020-11	Others
EPI_ISL_1380239	Telangana-State	2020-11	Others
EPI_ISL_1380240	Telangana-State	2020-11	Others
EPI_ISL_1380241	Telangana-State	2020-11	Others
EPI_ISL_1380242	Telangana-State	2020-11	Others
EPI_ISL_1380243	Telangana-State	2020-11	Others
EPI_ISL_1380244	Telangana-State	2020-11	Others
EPI_ISL_1380245	Telangana-State	2020-11	Others
EPI_ISL_1380246	Telangana-State	2020-11	Others
EPI_ISL_1380247	Telangana-State	2020-11	Others
EPI_ISL_1380248	Telangana-State	2020-11	Others
EPI_ISL_1380249	Telangana-State	2020-11	Others
EPI_ISL_1380250	Telangana-State	2020-11	Others
EPI_ISL_1380251	Telangana-State	2020-11	Others
EPI_ISL_1380252	Telangana-State	2020-11	Others
EPI_ISL_1380253	Telangana-State	2020-11	Others
EPI_ISL_1380254	Telangana-State	2020-11	Others
EPI_ISL_1380255	Telangana-State	2020-11	Others
EPI_ISL_1380256	Telangana-State	2020-11	Others
EPI_ISL_1380257	Telangana-State	2020-11	Others
EPI_ISL_1380258	Telangana-State	2020-11	Others
EPI_ISL_1380259	Telangana-State	2020-11	Others
EPI_ISL_1380260	Telangana-State	2020-11	Others
EPI_ISL_1380261	Telangana-State	2020-11	Others
EPI_ISL_1380262	Telangana-State	2020-11	Others
EPI_ISL_1380263	Telangana-State	2020-11	Others
EPI_ISL_1380264	Telangana-State	2020-11	Others
EPI_ISL_1380265	Telangana-State	2020-11	Others
EPI_ISL_1380266	Telangana-State	2020-11	Others
EPI_ISL_1380267	Telangana-State	2020-11	Others
EPI_ISL_1380268	Telangana-State	2020-11	Others
EPI_ISL_1380269	Telangana-State	2020-11	Others
EPI_ISL_1380270	Telangana-State	2020-11	Others
EPI_ISL_1380271	Telangana-State	2020-11	Others
EPI_ISL_1380272	Telangana-State	2020-11	Others
EPI_ISL_1380273	Telangana-State	2020-11	Others
EPI_ISL_1380274	Telangana-State	2020-11	Others
EPI_ISL_1380275	Telangana-State	2020-11	Others
EPI_ISL_1380276	Telangana-State	2020-11	Others
EPI_ISL_1380277	Telangana-State	2020-11	Others
EPI_ISL_1380278	Telangana-State	2020-11	Others
EPI_ISL_1380279	Telangana-State	2020-11	Others
EPI_ISL_1380280	Telangana-State	2020-11	Others
EPI_ISL_1380281	Telangana-State	2020-11	Others
EPI_ISL_1380282	Telangana-State	2020-11	Others
EPI_ISL_1380283	Telangana-State	2020-11	Others
EPI_ISL_1380284	Telangana-State	2020-11	Others
EPI_ISL_1380285	Telangana-State	2020-11	Others
EPI_ISL_1380286	Telangana-State	2020-11	Others
EPI_ISL_1380287	Telangana-State	2020-11	Others
EPI_ISL_1380288	Telangana-State	2020-11	Others
EPI_ISL_1380289	Telangana-State	2020-11	Others
EPI_ISL_1380290	Telangana-State	2020-11	Others
EPI_ISL_1380291	Telangana-State	2020-11	Others
EPI_ISL_1380292	Telangana-State	2020-11	Others
EPI_ISL_1380293	Telangana-State	2020-11	Others
EPI_ISL_1380294	Telangana-State	2020-11	Others
EPI_ISL_1380295	Telangana-State	2020-11	Others
EPI_ISL_1380296	Telangana-State	2020-11	Others
EPI_ISL_1380297	Telangana-State	2020-11	Others
EPI_ISL_1380298	Telangana-State	2020-11	Others
EPI_ISL_1380299	Telangana-State	2020-11	Others
EPI_ISL_1380300	Telangana-State	2020-11	Others
EPI_ISL_1380301	Telangana-State	2020-11	Others
EPI_ISL_1380302	Telangana-State	2020-11	Others
EPI_ISL_1380303	Telangana-State	2020-12	Others
EPI_ISL_1380304	Telangana-State	2020-12	Others
EPI_ISL_1380305	Telangana-State	2020-12	Others
EPI_ISL_1380306	Telangana-State	2020-12	Others
EPI_ISL_1380307	Telangana-State	2020-12	Others
EPI_ISL_1380308	Telangana-State	2020-12	Others
EPI_ISL_1380309	Telangana-State	2020-12	Others
EPI_ISL_1380310	Telangana-State	2020-12	Others
EPI_ISL_1380311	Telangana-State	2020-12	Others
EPI_ISL_1380312	Telangana-State	2020-12	Others
EPI_ISL_1380313	Telangana-State	2020-12	Others
EPI_ISL_1380314	Telangana-State	2020-12	Others
EPI_ISL_1380315	Telangana-State	2020-12	Others
EPI_ISL_1380316	Telangana-State	2020-12	Others
EPI_ISL_1380317	Telangana-State	2020-12	Others
EPI_ISL_1380318	Telangana-State	2020-12	Others
EPI_ISL_1380319	Telangana-State	2020-12	Others
EPI_ISL_1380320	Telangana-State	2020-12	Others
EPI_ISL_1380321	Telangana-State	2020-12	Others
EPI_ISL_1380322	Telangana-State	2020-12	Others
EPI_ISL_1380323	Telangana-State	2020-12	Others
EPI_ISL_1380324	Telangana-State	2020-12	Others
EPI_ISL_1380325	Telangana-State	2020-12	Others
EPI_ISL_1380326	Telangana-State	2020-12	Others
EPI_ISL_1380327	Telangana-State	2020-12	Others
EPI_ISL_1380328	Telangana-State	2020-12	Others
EPI_ISL_1380329	Telangana-State	2020-12	Others
EPI_ISL_1380330	Telangana-State	2020-12	Others
EPI_ISL_1380331	Telangana-State	2020-12	Others
EPI_ISL_1380332	Telangana-State	2020-12	Others
EPI_ISL_1380333	Telangana-State	2020-12	Others
EPI_ISL_1380334	Telangana-State	2020-12	Others
EPI_ISL_1380335	Telangana-State	2020-12	Others
EPI_ISL_1380336	Telangana-State	2020-12	Others
EPI_ISL_1380337	Telangana-State	2020-12	Others
EPI_ISL_1380341	Telangana-State	2020-12	Others
EPI_ISL_1380342	Telangana-State	2020-12	Others
EPI_ISL_1380343	Telangana-State	2020-12	Others
EPI_ISL_1419350	West Bengal-State	2021-02	Others
EPI_ISL_1419351	West Bengal-State	2021-02	Others
EPI_ISL_1419352	West Bengal-State	2021-02	Others
EPI_ISL_1419353	West Bengal-State	2021-02	Others
EPI_ISL_1419354	West Bengal-State	2021-02	Others
EPI_ISL_1419355	West Bengal-State	2021-02	Others
EPI_ISL_1419356	West Bengal-State	2021-02	Others
EPI_ISL_1419357	West Bengal-State	2021-02	Others
EPI_ISL_1419358	West Bengal-State	2020-10	Others
EPI_ISL_1419359	West Bengal-State	2020-10	Others
EPI_ISL_1419360	West Bengal-State	2020-10	Others
EPI_ISL_1419361	West Bengal-State	2020-10	Others
EPI_ISL_1419362	West Bengal-State	2020-10	Others
EPI_ISL_1419363	West Bengal-State	2020-10	Others
EPI_ISL_1419364	West Bengal-State	2020-10	Others
EPI_ISL_1419365	West Bengal-State	2020-10	Others
EPI_ISL_1419366	West Bengal-State	2020-10	Others
EPI_ISL_1419367	West Bengal-State	2020-10	Others
EPI_ISL_1419368	West Bengal-State	2020-10	Others
EPI_ISL_1419369	West Bengal-State	2020-10	Others
EPI_ISL_1419370	West Bengal-State	2020-10	Others
EPI_ISL_1419371	West Bengal-State	2020-10	Others
EPI_ISL_1419372	West Bengal-State	2020-10	Others
EPI_ISL_1419373	West Bengal-State	2020-10	Others
EPI_ISL_1419374	West Bengal-State	2020-10	Others
EPI_ISL_1419375	West Bengal-State	2020-10	Others
EPI_ISL_1419376	West Bengal-State	2020-10	Others
EPI_ISL_1419377	West Bengal-State	2020-10	Others
EPI_ISL_1419378	West Bengal-State	2020-10	Others
EPI_ISL_1419379	West Bengal-State	2020-10	Others
EPI_ISL_1419380	West Bengal-State	2020-10	Others
EPI_ISL_1419381	West Bengal-State	2020-10	Others
EPI_ISL_1419382	West Bengal-State	2020-10	Others
EPI_ISL_1419383	West Bengal-State	2020-10	Others
EPI_ISL_1419384	West Bengal-State	2020-10	Others
EPI_ISL_1419385	West Bengal-State	2020-10	Others
EPI_ISL_1419386	West Bengal-State	2020-10	Others
EPI_ISL_1419387	West Bengal-State	2020-10	Others
EPI_ISL_1419388	West Bengal-State	2020-10	Others
EPI_ISL_1419389	West Bengal-State	2020-10	Others
EPI_ISL_1419390	West Bengal-State	2020-10	Others
EPI_ISL_1419391	West Bengal-State	2020-10	Others
EPI_ISL_1419392	West Bengal-State	2020-10	Others
EPI_ISL_1419393	West Bengal-State	2020-10	Others
EPI_ISL_1419394	West Bengal-State	2020-10	Others
EPI_ISL_1419395	West Bengal-State	2020-10	Others
EPI_ISL_1419396	West Bengal-State	2020-10	Others
EPI_ISL_1419397	West Bengal-State	2020-10	Others
EPI_ISL_1419398	West Bengal-State	2020-10	Others
EPI_ISL_1419399	West Bengal-State	2020-04	Others
EPI_ISL_1419400	West Bengal-State	2020-04	Others
EPI_ISL_1419401	West Bengal-State	2020-04	Others
EPI_ISL_1419402	West Bengal-State	2020-04	Others
EPI_ISL_1419403	West Bengal-State	2020-04	Others
EPI_ISL_1419404	West Bengal-State	2021-03	Others
EPI_ISL_1419405	West Bengal-State	2021-03	Others
EPI_ISL_1419406	West Bengal-State	2021-03	Beta
EPI_ISL_1419407	West Bengal-State	2021-03	Alpha
EPI_ISL_1419408	West Bengal-State	2021-03	Eta
EPI_ISL_1419409	West Bengal-State	2021-02	Alpha
EPI_ISL_1419410	West Bengal-State	2021-02	Others
EPI_ISL_1419411	West Bengal-State	2021-03	Beta
EPI_ISL_1419412	West Bengal-State	2021-03	Alpha
EPI_ISL_1419413	West Bengal-State	2021-03	Others
EPI_ISL_1419414	West Bengal-State	2021-03	Alpha
EPI_ISL_1419415	West Bengal-State	2021-03	Alpha
EPI_ISL_1419416	West Bengal-State	2021-03	Others
EPI_ISL_1419417	West Bengal-State	2021-03	Others
EPI_ISL_1419418	West Bengal-State	2021-03	Others
EPI_ISL_1419419	West Bengal-State	2021-02	Others
EPI_ISL_1419420	West Bengal-State	2021-02	Others
EPI_ISL_1419421	West Bengal-State	2021-01	Others
EPI_ISL_1419424	West Bengal-State	2021-02	Others
EPI_ISL_1419425	West Bengal-State	2021-02	Others
EPI_ISL_1419426	West Bengal-State	2021-03	Others
EPI_ISL_1419427	West Bengal-State	2021-03	Others
EPI_ISL_1419428	West Bengal-State	2020-12	Alpha
EPI_ISL_1419429	West Bengal-State	2021-01	Others
EPI_ISL_1419430	West Bengal-State	2021-01	Others
EPI_ISL_1419431	West Bengal-State	2021-01	Others
EPI_ISL_1419432	West Bengal-State	2021-01	Others
EPI_ISL_1419433	West Bengal-State	2021-01	Others
EPI_ISL_1419434	West Bengal-State	2021-01	Others
EPI_ISL_1419435	West Bengal-State	2021-01	Others
EPI_ISL_1419436	West Bengal-State	2021-01	Others
EPI_ISL_1419437	West Bengal-State	2021-01	Others
EPI_ISL_1419438	West Bengal-State	2020-12	Others
EPI_ISL_1419439	West Bengal-State	2020-12	Others
EPI_ISL_1419440	West Bengal-State	2020-12	Others
EPI_ISL_1419441	West Bengal-State	2021-01	Others
EPI_ISL_1419442	West Bengal-State	2021-02	Others
EPI_ISL_1419443	West Bengal-State	2021-01	Others
EPI_ISL_1419444	West Bengal-State	2021-01	Others
EPI_ISL_1419445	West Bengal-State	2021-01	Others
EPI_ISL_1419446	West Bengal-State	2020-12	Others
EPI_ISL_1419447	West Bengal-State	2021-01	Others
EPI_ISL_1419448	West Bengal-State	2021-01	Others
EPI_ISL_1419449	West Bengal-State	2021-01	Others
EPI_ISL_1419450	West Bengal-State	2021-01	Others
EPI_ISL_1419451	West Bengal-State	2021-01	Others
EPI_ISL_1419452	West Bengal-State	2021-01	Others
EPI_ISL_1419453	West Bengal-State	2021-01	Others
EPI_ISL_1419454	West Bengal-State	2021-01	Others
EPI_ISL_1419455	West Bengal-State	2021-01	Others
EPI_ISL_1419456	West Bengal-State	2021-01	Others
EPI_ISL_1419457	West Bengal-State	2021-01	Others
EPI_ISL_1419458	West Bengal-State	2021-01	Others
EPI_ISL_1419459	West Bengal-State	2020-12	Others
EPI_ISL_1419460	West Bengal-State	2020-12	Others
EPI_ISL_1419461	West Bengal-State	2021-02	Others
EPI_ISL_1419462	West Bengal-State	2021-01	Others
EPI_ISL_1419463	West Bengal-State	2021-01	Others
EPI_ISL_1419464	West Bengal-State	2020-12	Others
EPI_ISL_1419465	West Bengal-State	2021-01	Others
EPI_ISL_1419466	West Bengal-State	2020-12	Others
EPI_ISL_1419467	West Bengal-State	2021-01	Others
EPI_ISL_1419468	West Bengal-State	2021-01	Others
EPI_ISL_1419469	West Bengal-State	2020-12	Others
EPI_ISL_1419470	West Bengal-State	2020-12	Others
EPI_ISL_1419471	West Bengal-State	2021-01	Others
EPI_ISL_1419472	West Bengal-State	2021-01	Others
EPI_ISL_1419473	West Bengal-State	2021-01	Others
EPI_ISL_1419474	West Bengal-State	2021-01	Others
EPI_ISL_1419475	West Bengal-State	2021-01	Others
EPI_ISL_1419476	West Bengal-State	2021-01	Others
EPI_ISL_1419477	West Bengal-State	2020-12	Others
EPI_ISL_1419478	West Bengal-State	2021-01	Others
EPI_ISL_1419479	West Bengal-State	2021-01	Others
EPI_ISL_1419480	West Bengal-State	2021-01	Others
EPI_ISL_1419481	West Bengal-State	2021-01	Others
EPI_ISL_1419482	West Bengal-State	2021-01	Others
EPI_ISL_1419483	West Bengal-State	2021-01	Others
EPI_ISL_1419484	West Bengal-State	2021-01	Others
EPI_ISL_1419485	West Bengal-State	2021-02	Others
EPI_ISL_1419486	West Bengal-State	2020-11	Others
EPI_ISL_1419487	West Bengal-State	2020-11	Others
EPI_ISL_1419488	West Bengal-State	2020-11	Others
EPI_ISL_1419489	West Bengal-State	2020-11	Others
EPI_ISL_1547799	Andhra Pradesh-State	2021-03	Kappa
EPI_ISL_435049	Gujarat-State	2020-04	Others
EPI_ISL_435050	Gujarat-State	2020-04	Others
EPI_ISL_435051	Gujarat-State	2020-04	Others
EPI_ISL_435052	Gujarat-State	2020-04	Others
EPI_ISL_435053	Gujarat-State	2020-04	Others
EPI_ISL_435054	Gujarat-State	2020-04	Others
EPI_ISL_435055	Gujarat-State	2020-04	Others
EPI_ISL_435056	Gujarat-State	2020-04	Others
EPI_ISL_435060	Uttar Pradesh-State	2020-03	Others
EPI_ISL_435062	Punjab-State	2020-03	Others
EPI_ISL_437626	Telangana-State	2020-03	Others
EPI_ISL_444457	Gujarat-State	2020-04	Others
EPI_ISL_444458	Gujarat-State	2020-04	Others
EPI_ISL_444459	Gujarat-State	2020-04	Others
EPI_ISL_444460	Gujarat-State	2020-04	Others
EPI_ISL_444461	Gujarat-State	2020-04	Others
EPI_ISL_444462	Gujarat-State	2020-04	Others
EPI_ISL_444463	Gujarat-State	2020-04	Others
EPI_ISL_444464	Gujarat-State	2020-04	Others
EPI_ISL_444465	Gujarat-State	2020-04	Others
EPI_ISL_444466	Gujarat-State	2020-04	Others
EPI_ISL_444467	Gujarat-State	2020-04	Others
EPI_ISL_444473	Gujarat-State	2020-04	Others
EPI_ISL_444474	Gujarat-State	2020-04	Others
EPI_ISL_444479	Gujarat-State	2020-04	Others
EPI_ISL_444480	Gujarat-State	2020-04	Others
EPI_ISL_444481	Gujarat-State	2020-04	Others
EPI_ISL_444482	Gujarat-State	2020-05	Others
EPI_ISL_444483	Gujarat-State	2020-05	Others
EPI_ISL_444484	Gujarat-State	2020-05	Others
EPI_ISL_444485	Gujarat-State	2020-05	Others
EPI_ISL_444486	Gujarat-State	2020-05	Others
EPI_ISL_447030	Gujarat-State	2020-05	Others
EPI_ISL_447031	Gujarat-State	2020-05	Others
EPI_ISL_447032	Gujarat-State	2020-05	Others
EPI_ISL_447033	Gujarat-State	2020-05	Others
EPI_ISL_447034	Gujarat-State	2020-05	Others
EPI_ISL_447035	Gujarat-State	2020-05	Others
EPI_ISL_447036	Gujarat-State	2020-05	Others
EPI_ISL_447037	Gujarat-State	2020-05	Others
EPI_ISL_447038	Gujarat-State	2020-05	Others
EPI_ISL_447039	Gujarat-State	2020-05	Others
EPI_ISL_447040	Gujarat-State	2020-05	Others
EPI_ISL_447041	Gujarat-State	2020-05	Others
EPI_ISL_447042	Gujarat-State	2020-05	Others
EPI_ISL_447043	Gujarat-State	2020-05	Others
EPI_ISL_447044	Gujarat-State	2020-05	Others
EPI_ISL_447045	Gujarat-State	2020-05	Others
EPI_ISL_447046	Gujarat-State	2020-05	Others
EPI_ISL_447047	Gujarat-State	2020-04	Others
EPI_ISL_447048	Gujarat-State	2020-04	Others
EPI_ISL_447049	Gujarat-State	2020-04	Others
EPI_ISL_450321	Maharashtra-State	2020-04	Others
EPI_ISL_450322	Maharashtra-State	2020-04	Others
EPI_ISL_450323	Maharashtra-State	2020-03	Others
EPI_ISL_450324	Maharashtra-State	2020-03	Others
EPI_ISL_450325	Maharashtra-State	2020-03	Others
EPI_ISL_450326	Telangana-State	2020-04	Others
EPI_ISL_450327	Telangana-State	2020-04	Others
EPI_ISL_450328	Telangana-State	2020-04	Others
EPI_ISL_450329	Telangana-State	2020-04	Others
EPI_ISL_450330	Telangana-State	2020-04	Others
EPI_ISL_450331	Telangana-State	2020-04	Others
EPI_ISL_450332	Telangana-State	2020-04	Others
EPI_ISL_451666	Gujarat-State	2020-05	Others
EPI_ISL_455478	Odisha-State	2020-04	Others
EPI_ISL_479493	Maharashtra-State	2020-04	Others
EPI_ISL_479494	Maharashtra-State	2020-04	Others
EPI_ISL_479495	Maharashtra-State	2020-04	Others
EPI_ISL_479496	Maharashtra-State	2020-04	Others
EPI_ISL_479497	Maharashtra-State	2020-04	Others
EPI_ISL_479498	Maharashtra-State	2020-04	Others
EPI_ISL_479499	Maharashtra-State	2020-04	Others
EPI_ISL_486382	Karnataka-State	2020-04	Others
EPI_ISL_486383	Karnataka-State	2020-04	Others
EPI_ISL_486385	Karnataka-State	2020-05	Others
EPI_ISL_486386	Karnataka-State	2020-05	Others
EPI_ISL_486387	Karnataka-State	2020-05	Others
EPI_ISL_486388	Karnataka-State	2020-05	Others
EPI_ISL_486389	Karnataka-State	2020-05	Others
EPI_ISL_486392	Karnataka-State	2020-04	Others
EPI_ISL_486394	Karnataka-State	2020-04	Others
EPI_ISL_486395	Karnataka-State	2020-04	Others
EPI_ISL_486396	Karnataka-State	2020-04	Others
EPI_ISL_486397	Karnataka-State	2020-04	Others
EPI_ISL_486398	Karnataka-State	2020-04	Others
EPI_ISL_486399	Karnataka-State	2020-04	Others
EPI_ISL_508210	Maharashtra-State	2020-06	Others
EPI_ISL_508211	Maharashtra-State	2020-06	Others
EPI_ISL_508212	Maharashtra-State	2020-06	Others
EPI_ISL_508213	Maharashtra-State	2020-06	Others
EPI_ISL_508214	Maharashtra-State	2020-06	Others
EPI_ISL_508215	Maharashtra-State	2020-06	Others
EPI_ISL_508216	Maharashtra-State	2020-06	Others
EPI_ISL_508217	Maharashtra-State	2020-06	Others
EPI_ISL_508218	Maharashtra-State	2020-06	Others
EPI_ISL_508219	Maharashtra-State	2020-06	Others
EPI_ISL_508220	Maharashtra-State	2020-06	Others
EPI_ISL_508221	Maharashtra-State	2020-06	Others
EPI_ISL_508222	Maharashtra-State	2020-06	Others
EPI_ISL_508223	Maharashtra-State	2020-06	Others
EPI_ISL_508224	Maharashtra-State	2020-06	Others
EPI_ISL_508225	Maharashtra-State	2020-06	Others
EPI_ISL_508226	Maharashtra-State	2020-06	Others
EPI_ISL_508227	Maharashtra-State	2020-06	Others
EPI_ISL_508228	Maharashtra-State	2020-06	Others
EPI_ISL_508229	Maharashtra-State	2020-06	Others
EPI_ISL_508230	Maharashtra-State	2020-06	Others
EPI_ISL_508231	Maharashtra-State	2020-06	Others
EPI_ISL_508232	Maharashtra-State	2020-06	Others
EPI_ISL_508233	Maharashtra-State	2020-06	Others
EPI_ISL_508234	Maharashtra-State	2020-06	Others
EPI_ISL_508235	Maharashtra-State	2020-06	Others
EPI_ISL_508236	Maharashtra-State	2020-06	Others
EPI_ISL_508237	Maharashtra-State	2020-06	Others
EPI_ISL_508238	Maharashtra-State	2020-06	Others
EPI_ISL_508239	Maharashtra-State	2020-06	Others
EPI_ISL_508240	Maharashtra-State	2020-06	Others
EPI_ISL_508241	Maharashtra-State	2020-06	Others
EPI_ISL_508242	Maharashtra-State	2020-06	Others
EPI_ISL_508243	Maharashtra-State	2020-06	Others
EPI_ISL_508244	Maharashtra-State	2020-06	Others
EPI_ISL_508245	Maharashtra-State	2020-06	Others
EPI_ISL_508246	Maharashtra-State	2020-06	Others
EPI_ISL_508247	Maharashtra-State	2020-06	Others
EPI_ISL_508248	Maharashtra-State	2020-06	Others
EPI_ISL_508249	Maharashtra-State	2020-06	Others
EPI_ISL_508250	Maharashtra-State	2020-06	Others
EPI_ISL_508251	Maharashtra-State	2020-06	Others
EPI_ISL_508252	Maharashtra-State	2020-06	Others
EPI_ISL_508253	Maharashtra-State	2020-06	Others
EPI_ISL_508254	Maharashtra-State	2020-06	Others
EPI_ISL_508255	Maharashtra-State	2020-06	Others
EPI_ISL_508256	Maharashtra-State	2020-06	Others
EPI_ISL_508257	Maharashtra-State	2020-06	Others
EPI_ISL_508258	Maharashtra-State	2020-06	Others
EPI_ISL_508259	Maharashtra-State	2020-06	Others
EPI_ISL_508260	Maharashtra-State	2020-06	Others
EPI_ISL_508261	Maharashtra-State	2020-06	Others
EPI_ISL_508262	Maharashtra-State	2020-06	Others
EPI_ISL_508263	Maharashtra-State	2020-06	Others
EPI_ISL_508264	Maharashtra-State	2020-06	Others
EPI_ISL_508265	Maharashtra-State	2020-06	Others
EPI_ISL_508266	Maharashtra-State	2020-06	Others
EPI_ISL_508267	Maharashtra-State	2020-06	Others
EPI_ISL_508268	Maharashtra-State	2020-06	Others
EPI_ISL_508269	Maharashtra-State	2020-06	Others
EPI_ISL_508270	Maharashtra-State	2020-06	Others
EPI_ISL_508271	Maharashtra-State	2020-06	Others
EPI_ISL_508272	Maharashtra-State	2020-06	Others
EPI_ISL_508273	Maharashtra-State	2020-06	Others
EPI_ISL_508274	Maharashtra-State	2020-06	Others
EPI_ISL_508275	Maharashtra-State	2020-06	Others
EPI_ISL_508276	Maharashtra-State	2020-06	Others
EPI_ISL_508277	Maharashtra-State	2020-06	Others
EPI_ISL_508278	Maharashtra-State	2020-06	Others
EPI_ISL_508279	Maharashtra-State	2020-06	Others
EPI_ISL_508280	Maharashtra-State	2020-06	Others
EPI_ISL_508281	Maharashtra-State	2020-06	Others
EPI_ISL_508282	Maharashtra-State	2020-06	Others
EPI_ISL_508283	Maharashtra-State	2020-06	Others
EPI_ISL_508284	Maharashtra-State	2020-06	Others
EPI_ISL_508285	Maharashtra-State	2020-06	Others
EPI_ISL_508286	Maharashtra-State	2020-06	Others
EPI_ISL_508287	Karnataka-State	2020-06	Others
EPI_ISL_508288	Karnataka-State	2020-06	Others
EPI_ISL_508289	Karnataka-State	2020-06	Others
EPI_ISL_508290	Karnataka-State	2020-06	Others
EPI_ISL_508291	Karnataka-State	2020-06	Others
EPI_ISL_508292	Karnataka-State	2020-06	Others
EPI_ISL_508293	Karnataka-State	2020-06	Others
EPI_ISL_508294	Karnataka-State	2020-06	Others
EPI_ISL_508295	Karnataka-State	2020-06	Others
EPI_ISL_508296	Karnataka-State	2020-06	Others
EPI_ISL_508297	Karnataka-State	2020-06	Others
EPI_ISL_508298	Karnataka-State	2020-06	Others
EPI_ISL_508299	Karnataka-State	2020-06	Others
EPI_ISL_508305	Karnataka-State	2020-05	Others
EPI_ISL_508310	Karnataka-State	2020-06	Others
EPI_ISL_508311	Karnataka-State	2020-06	Others
EPI_ISL_508312	Karnataka-State	2020-06	Others
EPI_ISL_508313	Karnataka-State	2020-06	Others
EPI_ISL_508314	Karnataka-State	2020-05	Others
EPI_ISL_508315	Karnataka-State	2020-06	Others
EPI_ISL_508316	Karnataka-State	2020-06	Others
EPI_ISL_508317	Karnataka-State	2020-06	Others
EPI_ISL_508318	Karnataka-State	2020-06	Others
EPI_ISL_508319	Karnataka-State	2020-06	Others
EPI_ISL_508320	Karnataka-State	2020-06	Others
EPI_ISL_508321	Karnataka-State	2020-06	Others
EPI_ISL_508322	Karnataka-State	2020-06	Others
EPI_ISL_508323	Karnataka-State	2020-06	Others
EPI_ISL_508324	Karnataka-State	2020-05	Others
EPI_ISL_508325	Karnataka-State	2020-06	Others
EPI_ISL_508326	Karnataka-State	2020-06	Others
EPI_ISL_508327	Karnataka-State	2020-06	Others
EPI_ISL_508328	Karnataka-State	2020-05	Others
EPI_ISL_508329	Karnataka-State	2020-06	Others
EPI_ISL_508400	West Bengal-State	2020-05	Others
EPI_ISL_508401	West Bengal-State	2020-05	Others
EPI_ISL_508402	West Bengal-State	2020-05	Others
EPI_ISL_508403	West Bengal-State	2020-05	Others
EPI_ISL_508404	West Bengal-State	2020-05	Others
EPI_ISL_508405	West Bengal-State	2020-05	Others
EPI_ISL_508406	West Bengal-State	2020-05	Others
EPI_ISL_508407	West Bengal-State	2020-04	Others
EPI_ISL_508408	West Bengal-State	2020-05	Others
EPI_ISL_508409	West Bengal-State	2020-05	Others
EPI_ISL_508410	West Bengal-State	2020-05	Others
EPI_ISL_508411	West Bengal-State	2020-05	Others
EPI_ISL_508412	West Bengal-State	2020-05	Others
EPI_ISL_508413	West Bengal-State	2020-05	Others
EPI_ISL_508414	West Bengal-State	2020-05	Others
EPI_ISL_508419	Uttar Pradesh-State	2020-06	Others
EPI_ISL_508423	Maharashtra-State	2020-04	Others
EPI_ISL_508424	Maharashtra-State	2020-05	Others
EPI_ISL_508425	Maharashtra-State	2020-05	Others
EPI_ISL_508426	Maharashtra-State	2020-05	Others
EPI_ISL_508427	Maharashtra-State	2020-05	Others
EPI_ISL_508428	Uttar Pradesh-State	2020-05	Others
EPI_ISL_508429	Maharashtra-State	2020-05	Others
EPI_ISL_508430	Maharashtra-State	2020-05	Others
EPI_ISL_508431	Maharashtra-State	2020-05	Others
EPI_ISL_508432	Maharashtra-State	2020-05	Others
EPI_ISL_508433	Maharashtra-State	2020-04	Others
EPI_ISL_508434	Odisha-State	2020-05	Others
EPI_ISL_508435	Maharashtra-State	2020-05	Others
EPI_ISL_508436	Maharashtra-State	2020-05	Others
EPI_ISL_508437	Maharashtra-State	2020-06	Others
EPI_ISL_508438	Maharashtra-State	2020-06	Others
EPI_ISL_508439	Maharashtra-State	2020-04	Others
EPI_ISL_508440	Maharashtra-State	2020-04	Others
EPI_ISL_508441	West Bengal-State	2020-06	Others
EPI_ISL_508442	West Bengal-State	2020-06	Others
EPI_ISL_508443	West Bengal-State	2020-06	Others
EPI_ISL_508444	West Bengal-State	2020-05	Others
EPI_ISL_508445	West Bengal-State	2020-05	Others
EPI_ISL_508446	West Bengal-State	2020-05	Others
EPI_ISL_508447	West Bengal-State	2020-04	Others
EPI_ISL_508448	West Bengal-State	2020-05	Others
EPI_ISL_508449	West Bengal-State	2020-05	Others
EPI_ISL_511899	West Bengal-State	2020-05	Others
EPI_ISL_511935	Maharashtra-State	2020-06	Others
EPI_ISL_511942	Haryana-State	2020-06	Others
EPI_ISL_511943	Haryana-State	2020-06	Others
EPI_ISL_511944	Haryana-State	2020-06	Others
EPI_ISL_511945	Karnataka-State	2020-05	Others
EPI_ISL_511946	Karnataka-State	2020-05	Others
EPI_ISL_511947	Karnataka-State	2020-06	Others
EPI_ISL_511948	Karnataka-State	2020-05	Others
EPI_ISL_511949	Karnataka-State	2020-05	Others
EPI_ISL_511950	Karnataka-State	2020-06	Others
EPI_ISL_511951	Karnataka-State	2020-05	Others
EPI_ISL_511952	Karnataka-State	2020-05	Others
EPI_ISL_511953	Karnataka-State	2020-06	Others
EPI_ISL_511954	Karnataka-State	2020-06	Others
EPI_ISL_528849	Telangana-State	2020-07	Others
EPI_ISL_528850	Telangana-State	2020-07	Others
EPI_ISL_528851	Telangana-State	2020-07	Others
EPI_ISL_528852	Telangana-State	2020-07	Others
EPI_ISL_528853	Telangana-State	2020-07	Others
EPI_ISL_528854	Telangana-State	2020-07	Others
EPI_ISL_528855	Telangana-State	2020-07	Others
EPI_ISL_528856	Telangana-State	2020-07	Others
EPI_ISL_528857	Telangana-State	2020-07	Others
EPI_ISL_528858	Telangana-State	2020-07	Others
EPI_ISL_528859	Telangana-State	2020-07	Others
EPI_ISL_528860	Telangana-State	2020-07	Others
EPI_ISL_528861	Telangana-State	2020-07	Others
EPI_ISL_528862	Telangana-State	2020-07	Others
EPI_ISL_528863	Telangana-State	2020-07	Others
EPI_ISL_528864	Telangana-State	2020-07	Others
EPI_ISL_528865	Telangana-State	2020-07	Others
EPI_ISL_528866	Telangana-State	2020-07	Others
EPI_ISL_528867	Telangana-State	2020-07	Others
EPI_ISL_528868	Telangana-State	2020-07	Others
EPI_ISL_528869	Telangana-State	2020-07	Others
EPI_ISL_528880	Telangana-State	2020-06	Others
EPI_ISL_539483	Punjab-State	2020-04	Others
EPI_ISL_539484	Punjab-State	2020-04	Others
EPI_ISL_539485	Punjab-State	2020-05	Others
EPI_ISL_539486	Punjab-State	2020-04	Others
EPI_ISL_539487	Punjab-State	2020-05	Others
EPI_ISL_539488	Punjab-State	2020-04	Others
EPI_ISL_539489	Punjab-State	2020-05	Others
EPI_ISL_539490	Punjab-State	2020-05	Others
EPI_ISL_539491	Uttarakhand-State	2020-06	Others
EPI_ISL_539492	Uttarakhand-State	2020-07	Others
EPI_ISL_541700	Maharashtra-State	2020-04	Others
EPI_ISL_541701	Maharashtra-State	2020-08	Others
EPI_ISL_541702	Maharashtra-State	2020-08	Others
EPI_ISL_541703	Maharashtra-State	2020-08	Others
EPI_ISL_541704	Maharashtra-State	2020-08	Others
EPI_ISL_541705	Maharashtra-State	2020-08	Others
EPI_ISL_541706	Maharashtra-State	2020-08	Others
EPI_ISL_541707	Maharashtra-State	2020-08	Others
EPI_ISL_541708	Maharashtra-State	2020-08	Others
EPI_ISL_541709	Maharashtra-State	2020-08	Others
EPI_ISL_541710	Maharashtra-State	2020-08	Others
EPI_ISL_541711	Maharashtra-State	2020-08	Others
EPI_ISL_541712	Maharashtra-State	2020-08	Others
EPI_ISL_541713	Maharashtra-State	2020-08	Others
EPI_ISL_541714	Maharashtra-State	2020-08	Others
EPI_ISL_541715	Maharashtra-State	2020-08	Others
EPI_ISL_541716	Maharashtra-State	2020-08	Others
EPI_ISL_541717	Maharashtra-State	2020-08	Others
EPI_ISL_541718	Maharashtra-State	2020-08	Others
EPI_ISL_541719	Maharashtra-State	2020-08	Others
EPI_ISL_577678	Maharashtra-State	2020-09	Others
EPI_ISL_577679	Maharashtra-State	2020-09	Others
EPI_ISL_577680	Maharashtra-State	2020-09	Others
EPI_ISL_577681	Maharashtra-State	2020-09	Others
EPI_ISL_577682	Maharashtra-State	2020-09	Others
EPI_ISL_577683	Maharashtra-State	2020-09	Others
EPI_ISL_577684	Maharashtra-State	2020-09	Others
EPI_ISL_577685	Maharashtra-State	2020-09	Others
EPI_ISL_577686	Maharashtra-State	2020-09	Others
EPI_ISL_577687	Maharashtra-State	2020-09	Others
EPI_ISL_577688	Maharashtra-State	2020-09	Others
EPI_ISL_577689	Maharashtra-State	2020-09	Others
EPI_ISL_577690	Maharashtra-State	2020-09	Others
EPI_ISL_577691	Maharashtra-State	2020-09	Others
EPI_ISL_577692	Maharashtra-State	2020-09	Others
EPI_ISL_577693	Maharashtra-State	2020-09	Others
EPI_ISL_577694	Maharashtra-State	2020-09	Others
EPI_ISL_577695	Maharashtra-State	2020-09	Others
EPI_ISL_577696	Maharashtra-State	2020-09	Others
EPI_ISL_577697	Maharashtra-State	2020-09	Others
EPI_ISL_577698	Maharashtra-State	2020-09	Others
EPI_ISL_577699	Maharashtra-State	2020-09	Others
EPI_ISL_577711	Maharashtra-State	2020-09	Others
EPI_ISL_577712	Maharashtra-State	2020-09	Others
EPI_ISL_577713	Maharashtra-State	2020-09	Others
EPI_ISL_577714	Karnataka-State	2020-09	Others
EPI_ISL_577715	Karnataka-State	2020-09	Others
EPI_ISL_577716	Maharashtra-State	2020-09	Others
EPI_ISL_577717	Maharashtra-State	2020-09	Others
EPI_ISL_577718	Maharashtra-State	2020-09	Others
EPI_ISL_577719	Maharashtra-State	2020-09	Others
EPI_ISL_577720	Maharashtra-State	2020-09	Others
EPI_ISL_577721	Maharashtra-State	2020-09	Others
EPI_ISL_577722	Maharashtra-State	2020-09	Others
EPI_ISL_577723	Maharashtra-State	2020-09	Others
EPI_ISL_577724	Maharashtra-State	2020-07	Others
EPI_ISL_577725	Maharashtra-State	2020-07	Others
EPI_ISL_577726	Maharashtra-State	2020-07	Others
EPI_ISL_577727	Maharashtra-State	2020-09	Others
EPI_ISL_577728	Maharashtra-State	2020-09	Others
EPI_ISL_577729	Maharashtra-State	2020-07	Others
EPI_ISL_577730	Maharashtra-State	2020-09	Others
EPI_ISL_577731	Maharashtra-State	2020-09	Others
EPI_ISL_577732	Maharashtra-State	2020-09	Others
EPI_ISL_577733	Maharashtra-State	2020-09	Others
EPI_ISL_590689	Gujarat-State	2020-06	Others
EPI_ISL_590690	Gujarat-State	2020-07	Others
EPI_ISL_590691	Gujarat-State	2020-07	Others
EPI_ISL_590692	Gujarat-State	2020-07	Others
EPI_ISL_700300	Maharashtra-State	2020-09	Others
EPI_ISL_700301	Maharashtra-State	2020-09	Others
EPI_ISL_700302	Maharashtra-State	2020-09	Others
EPI_ISL_700303	Maharashtra-State	2020-09	Others
EPI_ISL_700304	Maharashtra-State	2020-09	Others
EPI_ISL_700305	Maharashtra-State	2020-09	Others
EPI_ISL_700306	Uttar Pradesh-State	2020-09	Others
EPI_ISL_700307	Maharashtra-State	2020-09	Others
EPI_ISL_700308	Maharashtra-State	2020-09	Others
EPI_ISL_700309	Maharashtra-State	2020-09	Others
EPI_ISL_700310	Maharashtra-State	2020-09	Others
EPI_ISL_700311	West Bengal-State	2020-09	Others
EPI_ISL_700312	Maharashtra-State	2020-09	Others
EPI_ISL_700313	Odisha-State	2020-09	Others
EPI_ISL_700314	Maharashtra-State	2020-09	Others
EPI_ISL_700315	Maharashtra-State	2020-09	Others
EPI_ISL_700316	Maharashtra-State	2020-09	Others
EPI_ISL_700317	Maharashtra-State	2020-09	Others
EPI_ISL_700318	Maharashtra-State	2020-09	Others
EPI_ISL_700319	Maharashtra-State	2020-09	Others
EPI_ISL_700320	Maharashtra-State	2020-09	Others
EPI_ISL_700321	Maharashtra-State	2020-09	Others
EPI_ISL_700322	Maharashtra-State	2020-09	Others
EPI_ISL_700323	Maharashtra-State	2020-09	Others
EPI_ISL_700324	Maharashtra-State	2020-09	Others
EPI_ISL_700325	Maharashtra-State	2020-09	Others
EPI_ISL_723045	Maharashtra-State	2020-05	Others
EPI_ISL_723046	Maharashtra-State	2020-06	Others
EPI_ISL_723047	Maharashtra-State	2020-06	Others
EPI_ISL_723048	Maharashtra-State	2020-07	Others
EPI_ISL_723049	Maharashtra-State	2020-07	Others
EPI_ISL_723050	Maharashtra-State	2020-07	Others
EPI_ISL_723051	Maharashtra-State	2020-07	Others
EPI_ISL_723052	Maharashtra-State	2020-07	Others
EPI_ISL_723053	Maharashtra-State	2020-08	Others
EPI_ISL_723054	Maharashtra-State	2020-08	Others
EPI_ISL_723055	Maharashtra-State	2020-08	Others
EPI_ISL_723056	Maharashtra-State	2020-08	Others
EPI_ISL_723057	Maharashtra-State	2020-08	Others
EPI_ISL_723058	Maharashtra-State	2020-09	Others
EPI_ISL_723059	Maharashtra-State	2020-09	Others
EPI_ISL_723060	Maharashtra-State	2020-09	Others
EPI_ISL_723061	Maharashtra-State	2020-09	Others
EPI_ISL_723062	Maharashtra-State	2020-09	Others
EPI_ISL_723063	Maharashtra-State	2020-09	Others
EPI_ISL_723064	Maharashtra-State	2020-09	Others
EPI_ISL_723065	Maharashtra-State	2020-09	Others
EPI_ISL_723066	Maharashtra-State	2020-09	Others
EPI_ISL_723067	Maharashtra-State	2020-09	Others
EPI_ISL_723068	Maharashtra-State	2020-09	Others
EPI_ISL_723069	Maharashtra-State	2020-09	Others
EPI_ISL_723070	Maharashtra-State	2020-09	Others
EPI_ISL_723071	Maharashtra-State	2020-09	Others
EPI_ISL_723072	Maharashtra-State	2020-09	Others
EPI_ISL_723073	Maharashtra-State	2020-09	Others
EPI_ISL_723074	Maharashtra-State	2020-09	Others
EPI_ISL_723075	Maharashtra-State	2020-09	Others
EPI_ISL_723076	Maharashtra-State	2020-09	Others
EPI_ISL_807158	Karnataka-State	2020-12	Others
EPI_ISL_825034	Gujarat-State	2020-11	Others
EPI_ISL_825035	Gujarat-State	2020-11	Others
EPI_ISL_825036	Gujarat-State	2020-12	Others
EPI_ISL_825037	Gujarat-State	2020-11	Others
EPI_ISL_825038	Gujarat-State	2020-11	Others
EPI_ISL_825039	Gujarat-State	2020-11	Others
EPI_ISL_825040	Gujarat-State	2020-11	Others
EPI_ISL_825041	Gujarat-State	2020-11	Others
EPI_ISL_825042	Gujarat-State	2020-11	Others
EPI_ISL_825043	Gujarat-State	2020-12	Others
EPI_ISL_825044	Gujarat-State	2020-12	Alpha
EPI_ISL_825045	Gujarat-State	2020-12	Alpha
EPI_ISL_825046	Gujarat-State	2020-12	Others
EPI_ISL_825047	Gujarat-State	2020-12	Others
EPI_ISL_825048	Gujarat-State	2020-12	Others
EPI_ISL_825049	Gujarat-State	2020-12	Others
EPI_ISL_825050	Gujarat-State	2020-12	Alpha
EPI_ISL_825051	Gujarat-State	2020-12	Alpha
EPI_ISL_825052	Gujarat-State	2020-12	Alpha
EPI_ISL_825053	Gujarat-State	2020-12	Alpha
EPI_ISL_825054	Gujarat-State	2020-12	Alpha
EPI_ISL_825055	Gujarat-State	2020-12	Others
EPI_ISL_825056	Gujarat-State	2020-12	Others
EPI_ISL_825057	Gujarat-State	2020-12	Others
EPI_ISL_825058	Gujarat-State	2020-12	Others
EPI_ISL_825059	Gujarat-State	2020-12	Alpha
EPI_ISL_825060	Gujarat-State	2020-12	Alpha
EPI_ISL_825061	Gujarat-State	2020-12	Others
EPI_ISL_825062	Gujarat-State	2020-12	Others
EPI_ISL_825063	Gujarat-State	2020-12	Others
EPI_ISL_826274	Gujarat-State	2020-10	Others
EPI_ISL_826275	Gujarat-State	2020-12	Others
EPI_ISL_826276	Gujarat-State	2020-12	Others
EPI_ISL_871790	Uttar Pradesh-State	2020-08	Others
EPI_ISL_910050	Telangana-State	2020-08	Others
EPI_ISL_910051	Telangana-State	2020-08	Others
EPI_ISL_910052	Telangana-State	2020-08	Others
EPI_ISL_910053	Telangana-State	2020-08	Others
EPI_ISL_910054	Telangana-State	2020-08	Others
EPI_ISL_910055	Telangana-State	2020-08	Others
EPI_ISL_910056	Telangana-State	2020-08	Others
EPI_ISL_910057	Telangana-State	2020-08	Others
EPI_ISL_910058	Telangana-State	2020-08	Others
EPI_ISL_910059	Telangana-State	2020-08	Others
EPI_ISL_910060	Telangana-State	2020-08	Others
EPI_ISL_910061	Telangana-State	2020-08	Others
EPI_ISL_910062	Telangana-State	2020-08	Others
EPI_ISL_910063	Telangana-State	2020-08	Others
EPI_ISL_910064	Telangana-State	2020-08	Others
EPI_ISL_910065	Telangana-State	2020-08	Others
EPI_ISL_910066	Telangana-State	2020-08	Others
EPI_ISL_910067	Telangana-State	2020-08	Others
EPI_ISL_910068	Telangana-State	2020-08	Others
EPI_ISL_910069	Telangana-State	2020-08	Others
EPI_ISL_910070	Telangana-State	2020-08	Others
EPI_ISL_910071	Telangana-State	2020-08	Others
EPI_ISL_910072	Telangana-State	2020-08	Others
EPI_ISL_910073	Telangana-State	2020-08	Others
EPI_ISL_910074	Telangana-State	2020-08	Others
EPI_ISL_910075	Telangana-State	2020-08	Others
EPI_ISL_910076	Telangana-State	2020-08	Others
EPI_ISL_910077	Telangana-State	2020-08	Others
EPI_ISL_910078	Telangana-State	2020-08	Others
EPI_ISL_910079	Telangana-State	2020-08	Others
EPI_ISL_910080	Telangana-State	2020-08	Others
EPI_ISL_910081	Telangana-State	2020-08	Others
EPI_ISL_910082	Telangana-State	2020-08	Others
EPI_ISL_910083	Telangana-State	2020-08	Others
EPI_ISL_910084	Telangana-State	2020-08	Others
EPI_ISL_910085	Telangana-State	2020-08	Others
EPI_ISL_910086	Telangana-State	2020-08	Others
EPI_ISL_910087	Telangana-State	2020-08	Others
EPI_ISL_910088	Telangana-State	2020-08	Others
EPI_ISL_910089	Telangana-State	2020-08	Others
EPI_ISL_910090	Telangana-State	2020-08	Others
EPI_ISL_910091	Telangana-State	2020-08	Others
EPI_ISL_910092	Telangana-State	2020-08	Others
EPI_ISL_910093	Telangana-State	2020-08	Others
EPI_ISL_910094	Telangana-State	2020-08	Others
EPI_ISL_910095	Telangana-State	2020-08	Others
EPI_ISL_910096	Telangana-State	2020-08	Others
EPI_ISL_910097	Telangana-State	2020-08	Others
EPI_ISL_910098	Telangana-State	2020-08	Others
EPI_ISL_910099	Telangana-State	2020-08	Others
EPI_ISL_910200	Telangana-State	2020-09	Others
EPI_ISL_910201	Telangana-State	2020-09	Others
EPI_ISL_910202	Telangana-State	2020-09	Others
EPI_ISL_910203	Telangana-State	2020-09	Others
EPI_ISL_910204	Telangana-State	2020-09	Others
EPI_ISL_910205	Telangana-State	2020-09	Others
EPI_ISL_910206	Telangana-State	2020-09	Others
EPI_ISL_910207	Telangana-State	2020-09	Others
EPI_ISL_910208	Telangana-State	2020-09	Others
EPI_ISL_910209	Telangana-State	2020-09	Others
EPI_ISL_910210	Telangana-State	2020-09	Others
EPI_ISL_910211	Telangana-State	2020-09	Others
EPI_ISL_910212	Telangana-State	2020-09	Others
EPI_ISL_910213	Telangana-State	2020-09	Others
EPI_ISL_910214	Telangana-State	2020-09	Others
EPI_ISL_910215	Telangana-State	2020-09	Others
EPI_ISL_910216	Telangana-State	2020-09	Others
EPI_ISL_910217	Telangana-State	2020-09	Others
EPI_ISL_910218	Telangana-State	2020-09	Others
EPI_ISL_910219	Telangana-State	2020-09	Others
EPI_ISL_910220	Telangana-State	2020-09	Others
EPI_ISL_910221	Telangana-State	2020-09	Others
EPI_ISL_910223	Telangana-State	2020-09	Others
EPI_ISL_910224	Telangana-State	2020-09	Others
EPI_ISL_910225	Telangana-State	2020-09	Others
EPI_ISL_910226	Telangana-State	2020-09	Others
EPI_ISL_910227	Telangana-State	2020-09	Others
EPI_ISL_910228	Telangana-State	2020-09	Others
EPI_ISL_910229	Telangana-State	2020-09	Others
EPI_ISL_910230	Telangana-State	2020-09	Others
EPI_ISL_910231	Telangana-State	2020-09	Others
EPI_ISL_910232	Telangana-State	2020-09	Others
EPI_ISL_910233	Telangana-State	2020-09	Others
EPI_ISL_910234	Telangana-State	2020-09	Others
EPI_ISL_910235	Telangana-State	2020-09	Others
EPI_ISL_910236	Telangana-State	2020-09	Others
EPI_ISL_910237	Telangana-State	2020-09	Others
EPI_ISL_910238	Telangana-State	2020-09	Others
EPI_ISL_910239	Telangana-State	2020-09	Others
EPI_ISL_910240	Telangana-State	2020-09	Others
EPI_ISL_910241	Telangana-State	2020-09	Others
EPI_ISL_910242	Telangana-State	2020-09	Others
EPI_ISL_910243	Telangana-State	2020-09	Others
EPI_ISL_910244	Telangana-State	2020-09	Others
EPI_ISL_910245	Telangana-State	2020-09	Others
EPI_ISL_910246	Telangana-State	2020-09	Others
EPI_ISL_910247	Telangana-State	2020-09	Others
EPI_ISL_910248	Telangana-State	2020-09	Others
EPI_ISL_910249	Telangana-State	2020-09	Others
EPI_ISL_910250	Telangana-State	2020-09	Others
EPI_ISL_910251	Telangana-State	2020-09	Others
EPI_ISL_910252	Telangana-State	2020-09	Others
EPI_ISL_910253	Telangana-State	2020-09	Others
EPI_ISL_910254	Telangana-State	2020-09	Others
EPI_ISL_910255	Telangana-State	2020-09	Others
EPI_ISL_910256	Telangana-State	2020-09	Others
EPI_ISL_910257	Telangana-State	2020-09	Others
EPI_ISL_910258	Telangana-State	2020-09	Others
EPI_ISL_910259	Telangana-State	2020-09	Others
EPI_ISL_910260	Telangana-State	2020-09	Others
EPI_ISL_910261	Telangana-State	2020-09	Others
EPI_ISL_910262	Telangana-State	2020-09	Others
EPI_ISL_910263	Telangana-State	2020-09	Others
EPI_ISL_910264	Telangana-State	2020-09	Others
EPI_ISL_910265	Telangana-State	2020-09	Others
EPI_ISL_910266	Telangana-State	2020-09	Others
EPI_ISL_910267	Telangana-State	2020-09	Others
EPI_ISL_910268	Telangana-State	2020-09	Others
EPI_ISL_910269	Telangana-State	2020-09	Others
EPI_ISL_910270	Telangana-State	2020-09	Others
EPI_ISL_910271	Telangana-State	2020-09	Others
EPI_ISL_910272	Telangana-State	2020-09	Others
EPI_ISL_910273	Telangana-State	2020-09	Others
EPI_ISL_910274	Telangana-State	2020-09	Others
EPI_ISL_910275	Telangana-State	2020-09	Others
EPI_ISL_910276	Telangana-State	2020-09	Others
EPI_ISL_910277	Telangana-State	2020-09	Others
EPI_ISL_910278	Telangana-State	2020-09	Others
EPI_ISL_910279	Telangana-State	2020-09	Others
EPI_ISL_910280	Telangana-State	2020-09	Others
EPI_ISL_910281	Telangana-State	2020-09	Others
EPI_ISL_910282	Telangana-State	2020-09	Others
EPI_ISL_910283	Telangana-State	2020-09	Others
EPI_ISL_910284	Telangana-State	2020-09	Others
EPI_ISL_910285	Telangana-State	2020-09	Others
EPI_ISL_910286	Telangana-State	2020-09	Others
EPI_ISL_910287	Telangana-State	2020-09	Others
EPI_ISL_910288	Telangana-State	2020-09	Others
EPI_ISL_910289	Telangana-State	2020-09	Others
EPI_ISL_1063802	Odisha-State	2020-08	Others
EPI_ISL_1063803	Odisha-State	2020-08	Others
EPI_ISL_1063804	Odisha-State	2020-08	Others
EPI_ISL_1063805	Odisha-State	2020-08	Others
EPI_ISL_1063806	Odisha-State	2021-01	Others
EPI_ISL_1063807	Odisha-State	2020-12	Others
EPI_ISL_1063808	Odisha-State	2020-11	Others
EPI_ISL_1063809	Odisha-State	2020-12	Others
EPI_ISL_1063810	Odisha-State	2021-01	Others
EPI_ISL_1063811	Odisha-State	2021-01	Others
EPI_ISL_1063812	Odisha-State	2021-01	Others
EPI_ISL_1063813	Odisha-State	2020-08	Others
EPI_ISL_1063814	Odisha-State	2021-01	Others
EPI_ISL_1063815	Odisha-State	2021-01	Others
EPI_ISL_1063816	Odisha-State	2021-01	Others
EPI_ISL_1063817	Odisha-State	2020-10	Others
EPI_ISL_1063818	Odisha-State	2020-10	Others
EPI_ISL_1063819	Odisha-State	2020-06	Others
EPI_ISL_1063820	Odisha-State	2020-07	Others
EPI_ISL_1063821	Odisha-State	2020-07	Others
EPI_ISL_1063822	Odisha-State	2020-07	Others
EPI_ISL_1063823	Odisha-State	2020-07	Others
EPI_ISL_1063824	Odisha-State	2020-07	Others
EPI_ISL_1063825	Odisha-State	2020-08	Others
EPI_ISL_1063826	Odisha-State	2020-08	Others
EPI_ISL_1063827	Odisha-State	2020-08	Others
EPI_ISL_1063828	Odisha-State	2020-08	Others
EPI_ISL_1063829	Odisha-State	2020-08	Others
EPI_ISL_1063830	Odisha-State	2020-08	Others
EPI_ISL_1063831	Odisha-State	2020-08	Others
EPI_ISL_1063832	Odisha-State	2020-08	Others
EPI_ISL_1063833	Odisha-State	2020-08	Others
EPI_ISL_1063834	Odisha-State	2020-08	Others
EPI_ISL_1063835	Odisha-State	2020-09	Others
EPI_ISL_1063836	Odisha-State	2020-08	Others
EPI_ISL_1063837	Odisha-State	2020-08	Others
EPI_ISL_1063838	Odisha-State	2020-08	Others
EPI_ISL_1063839	Odisha-State	2020-08	Others
EPI_ISL_1063840	Odisha-State	2020-12	Others
EPI_ISL_1063841	Odisha-State	2020-12	Others
EPI_ISL_1063842	Odisha-State	2020-12	Others
EPI_ISL_1063843	Odisha-State	2020-12	Others
EPI_ISL_1063844	Odisha-State	2020-12	Others
EPI_ISL_1063845	Odisha-State	2020-12	Others
EPI_ISL_1063868	Odisha-State	2020-11	Others
EPI_ISL_1063869	Odisha-State	2020-11	Others
EPI_ISL_1063870	Odisha-State	2020-11	Others
EPI_ISL_1063871	Odisha-State	2020-11	Others
EPI_ISL_1063872	Odisha-State	2020-11	Others
EPI_ISL_1063873	Odisha-State	2020-11	Others
EPI_ISL_1063874	Odisha-State	2020-11	Others
EPI_ISL_1063875	Odisha-State	2020-11	Others
EPI_ISL_1063876	Odisha-State	2020-11	Others
EPI_ISL_1063877	Odisha-State	2021-01	Others
EPI_ISL_1063878	Odisha-State	2020-11	Others
EPI_ISL_1081834	Maharashtra-State	2020-05	Others
EPI_ISL_1081835	Maharashtra-State	2020-06	Others
EPI_ISL_1103556	Andhra Pradesh-State	2020-07	Others
EPI_ISL_1103557	Andhra Pradesh-State	2020-09	Others
EPI_ISL_1176350	Manipur-State	2020-07	Others
EPI_ISL_1176351	Manipur-State	2020-07	Others
EPI_ISL_1176352	Manipur-State	2020-07	Others
EPI_ISL_1176353	Manipur-State	2020-07	Others
EPI_ISL_1176354	Manipur-State	2020-07	Others
EPI_ISL_1250853	Karnataka-State	2021-02	Others
EPI_ISL_1250854	Karnataka-State	2021-02	Others
EPI_ISL_1250855	Karnataka-State	2021-02	Others
EPI_ISL_1250856	Karnataka-State	2021-02	Others
EPI_ISL_1250857	Karnataka-State	2021-02	Others
EPI_ISL_1250858	Karnataka-State	2021-02	Others
EPI_ISL_1357700	West Bengal-State	2021-03	Kappa
EPI_ISL_1357701	West Bengal-State	2021-03	Kappa
EPI_ISL_1357702	West Bengal-State	2021-03	Kappa
EPI_ISL_1357703	West Bengal-State	2021-03	Kappa
EPI_ISL_1357704	West Bengal-State	2021-02	Kappa
EPI_ISL_1357705	West Bengal-State	2021-03	Kappa
EPI_ISL_1357706	West Bengal-State	2021-03	Kappa
EPI_ISL_1380066	Telangana-State	2020-10	Others
EPI_ISL_1380067	Telangana-State	2020-10	Others
EPI_ISL_1380068	Telangana-State	2020-10	Others
EPI_ISL_1380069	Telangana-State	2020-10	Others
EPI_ISL_1380070	Telangana-State	2020-10	Others
EPI_ISL_1380071	Telangana-State	2020-10	Others
EPI_ISL_1380072	Telangana-State	2020-10	Others
EPI_ISL_1380073	Telangana-State	2020-10	Others
EPI_ISL_1380074	Telangana-State	2020-10	Others
EPI_ISL_1380075	Telangana-State	2020-10	Others
EPI_ISL_1380076	Telangana-State	2020-10	Others
EPI_ISL_1380077	Telangana-State	2020-10	Others
EPI_ISL_1380078	Telangana-State	2020-10	Others
EPI_ISL_1380079	Telangana-State	2020-10	Others
EPI_ISL_1380080	Telangana-State	2020-10	Others
EPI_ISL_1380081	Telangana-State	2020-10	Others
EPI_ISL_1380082	Telangana-State	2020-10	Others
EPI_ISL_1380083	Telangana-State	2020-10	Others
EPI_ISL_1380084	Telangana-State	2020-10	Others
EPI_ISL_1380085	Telangana-State	2020-10	Others
EPI_ISL_1380086	Telangana-State	2020-10	Others
EPI_ISL_1380087	Telangana-State	2020-10	Others
EPI_ISL_1380088	Telangana-State	2020-10	Others
EPI_ISL_1380089	Telangana-State	2020-10	Others
EPI_ISL_1380090	Telangana-State	2020-10	Others
EPI_ISL_1380091	Telangana-State	2020-10	Others
EPI_ISL_1380092	Telangana-State	2020-10	Others
EPI_ISL_1380093	Telangana-State	2020-10	Others
EPI_ISL_1380094	Telangana-State	2020-10	Others
EPI_ISL_1380095	Telangana-State	2020-10	Others
EPI_ISL_1380096	Telangana-State	2020-10	Others
EPI_ISL_1380097	Telangana-State	2020-10	Others
EPI_ISL_1380098	Telangana-State	2020-10	Others
EPI_ISL_1380099	Telangana-State	2020-10	Others
EPI_ISL_1380100	Telangana-State	2020-10	Others
EPI_ISL_1380101	Telangana-State	2020-10	Others
EPI_ISL_1380102	Telangana-State	2020-10	Others
EPI_ISL_1380103	Telangana-State	2020-10	Others
EPI_ISL_1380104	Telangana-State	2020-10	Others
EPI_ISL_1380105	Telangana-State	2020-10	Others
EPI_ISL_1380106	Telangana-State	2020-10	Others
EPI_ISL_1380107	Telangana-State	2020-10	Others
EPI_ISL_1380108	Telangana-State	2020-10	Others
EPI_ISL_1380109	Telangana-State	2020-10	Others
EPI_ISL_1380110	Telangana-State	2020-10	Others
EPI_ISL_1380111	Telangana-State	2020-10	Others
EPI_ISL_1380112	Telangana-State	2020-10	Others
EPI_ISL_1380113	Telangana-State	2020-10	Others
EPI_ISL_1380114	Telangana-State	2020-10	Others
EPI_ISL_1380115	Telangana-State	2020-10	Others
EPI_ISL_1380116	Telangana-State	2020-10	Others
EPI_ISL_1380117	Telangana-State	2020-10	Others
EPI_ISL_1380118	Telangana-State	2020-10	Others
EPI_ISL_1380119	Telangana-State	2020-10	Others
EPI_ISL_1380120	Telangana-State	2020-10	Others
EPI_ISL_1380121	Telangana-State	2020-10	Others
EPI_ISL_1380122	Telangana-State	2020-10	Others
EPI_ISL_1380123	Telangana-State	2020-10	Others
EPI_ISL_1380124	Telangana-State	2020-10	Others
[truncated: 40,990 more rows]
