# Supplementary material for: Circulation and Evolution of SARS-CoV-2 in India: Let the Data Speak
Source: Viruses. 2021 Nov 8;13(11):2238. doi: 10.3390/v13112238 (PMC8619538; doi:10.3390/v13112238)
Supplement: Supplementary file 1 [file viruses-13-02238-s001.zip › Supplementary file 3.xlsx]

## Sheet: Dataset_2
Accession_ID	Isolation state	Collection Date	Nextclade	Pangolin	GISAID	WHO	VOI/VOC
EPI_ISL_2233147	Maharashtra	2021-03-29	20A	B.1.36.22	GH	Others	NA
EPI_ISL_1789813	Assam	2020-06	20B	B.1.1	GR	Others	NA
EPI_ISL_1789814	Jharkhand	2020-05	20A	B.1.36	GH	Others	NA
EPI_ISL_1838063	Maharashtra	2021-04-06	21A	B.1.617.2	G	Delta	VOC
EPI_ISL_1838068	Maharashtra	2021-04-06	21A	B.1.393	G	Others	NA
EPI_ISL_1838073	Maharashtra	2021-04-06	21A	B.1.617.2	G	Delta	VOC
EPI_ISL_1838075	Maharashtra	2021-04-06	21A	B.1.617.1	G	Kappa	VOI
EPI_ISL_1838078	Maharashtra	2021-04-06	21A	B.1	G	Others	NA
EPI_ISL_1838080	Maharashtra	2021-04-06	21A	B.1	G	Others	NA
EPI_ISL_1838097	Maharashtra	2021-04-06	21A	B.1.617.3	G	Others	NA
EPI_ISL_1838900	Telangana	2021-04-12	20H/501Y.V2	B.1.351	GH	Beta	VOC
EPI_ISL_1838911	Telangana	2021-04-12	20A	B.1.153	G	Others	NA
EPI_ISL_1838914	Telangana	2021-04-12	21A	B.1.617.2	G	Delta	VOC
EPI_ISL_1841236	Gujarat	2021-04-18	21A	B.1.617.1	G	Kappa	VOI
EPI_ISL_1841237	Gujarat	2021-04-18	21A	B.1.617.1	G	Kappa	VOI
EPI_ISL_1841238	Gujarat	2021-04-18	21A	B.1.617.1	G	Kappa	VOI
EPI_ISL_1841239	Gujarat	2021-04-18	21A	B.1.617.1	G	Kappa	VOI
EPI_ISL_1841240	Gujarat	2021-04-18	21A	B.1.617.2	G	Delta	VOC
EPI_ISL_1841241	Gujarat	2021-04-18	21A	B.1.617.2	G	Delta	VOC
EPI_ISL_1841242	Gujarat	2021-04-17	21A	B.1.617.2	G	Delta	VOC
EPI_ISL_1841243	Gujarat	2021-04-18	21A	B.1.617.2	G	Delta	VOC
EPI_ISL_1841244	Gujarat	2021-04-17	21A	B.1.617.2	G	Delta	VOC
EPI_ISL_1841245	Gujarat	2021-04-18	21A	B.1.617.2	G	Delta	VOC
EPI_ISL_1841246	Gujarat	2021-04-17	21A	B.1.617.2	G	Delta	VOC
EPI_ISL_1841248	Gujarat	2021-04-18	21A	B.1.617.2	G	Delta	VOC
EPI_ISL_1841249	Gujarat	2021-04-18	21A	B.1.617.2	G	Delta	VOC
EPI_ISL_1841250	Gujarat	2021-04-18	21A	B.1.617.2	G	Delta	VOC
EPI_ISL_1841251	Gujarat	2021-04-17	21A	B.1.617.2	G	Delta	VOC
EPI_ISL_1841252	Gujarat	2021-04-18	21A	B.1.617.2	G	Delta	VOC
EPI_ISL_1841253	Gujarat	2021-04-18	21A	B.1.617.2	G	Delta	VOC
EPI_ISL_1841254	Gujarat	2021-04-18	21A	B.1.617.2	G	Delta	VOC
EPI_ISL_1841255	Gujarat	2021-04-18	21A	B.1.617.2	G	Delta	VOC
EPI_ISL_1841256	Gujarat	2021-04-18	21A	B.1.617.2	G	Delta	VOC
EPI_ISL_1841257	Gujarat	2021-04-18	21A	B.1.409	G	Others	NA
EPI_ISL_1841258	Gujarat	2021-04-18	21A	B.1.617.2	G	Delta	VOC
EPI_ISL_1841259	Gujarat	2021-04-18	21A	B.1.617.2	G	Delta	VOC
EPI_ISL_1841260	Gujarat	2021-04-18	21A	B.1.617.2	G	Delta	VOC
EPI_ISL_1841261	Gujarat	2021-04-18	21A	B.1.617.2	G	Delta	VOC
EPI_ISL_1841262	Gujarat	2021-04-19	21A	B.1.617.2	G	Delta	VOC
EPI_ISL_1841263	Gujarat	2021-04-18	21A	B.1.617.2	G	Delta	VOC
EPI_ISL_1841265	Gujarat	2021-04-18	21A	B.1.617.2	G	Delta	VOC
EPI_ISL_1841266	Gujarat	2021-04-18	21A	B.1.617.2	G	Delta	VOC
EPI_ISL_1841267	Gujarat	2021-04-18	21A	B.1.617.2	G	Delta	VOC
EPI_ISL_1841268	Gujarat	2021-04-18	21A	B.1.617.2	G	Delta	VOC
EPI_ISL_1841269	Gujarat	2021-04-18	21A	B.1.617.2	G	Delta	VOC
EPI_ISL_1841270	Gujarat	2021-04-18	21A	B.1.617.2	G	Delta	VOC
EPI_ISL_1841271	Gujarat	2021-04-18	21A	B.1.617.2	G	Delta	VOC
EPI_ISL_1841272	Gujarat	2021-04-18	21A	B.1.617.2	G	Delta	VOC
EPI_ISL_1841273	Gujarat	2021-04-18	21A	B.1.617.2	G	Delta	VOC
EPI_ISL_1841274	Gujarat	2021-04-18	21A	B.1.617.2	G	Delta	VOC
EPI_ISL_1841275	Gujarat	2021-04-18	21A	B.1.617.2	G	Delta	VOC
EPI_ISL_1841276	Gujarat	2021-04-18	21A	B.1.617.2	G	Delta	VOC
EPI_ISL_1841277	Gujarat	2021-04-18	20I/501Y.V1	B.1.1.7	GRY	Alpha	VOC
EPI_ISL_1841278	Gujarat	2021-04-18	20I/501Y.V1	B.1.1.7	GRY	Alpha	VOC
EPI_ISL_1841279	Gujarat	2021-04-10	21A	B.1.617.2	G	Delta	VOC
EPI_ISL_1841280	Gujarat	2021-04-10	21A	B.1.617.2	G	Delta	VOC
EPI_ISL_1841281	Gujarat	2021-04-21	21A	B.1.617.2	G	Delta	VOC
EPI_ISL_1841282	Gujarat	2021-04-03	21A	B.1.617.2	G	Delta	VOC
EPI_ISL_1841283	Gujarat	2021-04-21	21A	B.1.617.2	G	Delta	VOC
EPI_ISL_1841284	Gujarat	2021-04-23	21A	B.1.617.2	G	Delta	VOC
EPI_ISL_1841285	Gujarat	2021-04-23	21A	B.1.617.2	G	Delta	VOC
EPI_ISL_1841286	Maharashtra	2021-03-23	21A	B.1.617.1	G	Kappa	VOI
EPI_ISL_1841287	Maharashtra	2021-03-23	21A	B.1.617.1	G	Kappa	VOI
EPI_ISL_1841288	Maharashtra	2021-03-23	21A	B.1.617.1	G	Kappa	VOI
EPI_ISL_1841289	Maharashtra	2021-03-23	21A	B.1.617.1	G	Kappa	VOI
EPI_ISL_1841290	Maharashtra	2021-03-23	21A	B.1.617.1	G	Kappa	VOI
EPI_ISL_1841291	Maharashtra	2021-03-23	21A	B.1.617.1	G	Kappa	VOI
EPI_ISL_1841292	Maharashtra	2021-03-23	21A	B.1.617.1	G	Kappa	VOI
EPI_ISL_1841293	Maharashtra	2021-03-23	21A	B.1.617.2	G	Delta	VOC
EPI_ISL_1841294	Maharashtra	2021-03-25	21A	B.1.617.1	G	Kappa	VOI
EPI_ISL_1841295	Maharashtra	2021-03-26	21A	B.1.617.1	G	Kappa	VOI
EPI_ISL_1841296	Maharashtra	2021-04-02	21A	B.1.617.1	G	Kappa	VOI
EPI_ISL_1841297	Maharashtra	2021-03-14	21A	B.1.617.1	G	Kappa	VOI
EPI_ISL_1841298	Maharashtra	2021-03-14	21A	B.1.617.1	G	Kappa	VOI
EPI_ISL_1841299	Maharashtra	2021-03-14	21A	B.1.617.1	G	Kappa	VOI
EPI_ISL_1844743	Punjab	2021-01-22	20A	B.1.36	GH	Others	NA
EPI_ISL_1928491	Maharashtra	2021-03-30	21A	B.1.617.1	G	Kappa	VOI
EPI_ISL_1928493	Maharashtra	2021-03-30	21A	B.1.617.1	G	Kappa	VOI
EPI_ISL_1928494	Maharashtra	2021-03-30	21A	B.1.617.1	G	Kappa	VOI
EPI_ISL_1928496	Maharashtra	2021-04	21A	B.1.617.1	G	Kappa	VOI
EPI_ISL_1928499	Maharashtra	2021-04	20I/501Y.V1	B.1.1.7	GR	Alpha	VOC
EPI_ISL_1970419	Maharashtra	2021-03-22	21A	B.1.617.1	G	Kappa	VOI
EPI_ISL_1970420	Maharashtra	2021-03-24	21A	B.1.617.1	G	Kappa	VOI
EPI_ISL_1970421	Maharashtra	2021-03-24	21A	B.1.617.1	G	Kappa	VOI
EPI_ISL_1970422	Maharashtra	2021-03-30	21A	B.1.617.2	G	Delta	VOC
EPI_ISL_1970423	Maharashtra	2021-03-30	20I/501Y.V1	B.1.1.7	GR	Alpha	VOC
EPI_ISL_1970424	Maharashtra	2021-03-31	21A	B.1.617.1	G	Kappa	VOI
EPI_ISL_1970425	Maharashtra	2021-03-31	21A	B.1.617.1	G	Kappa	VOI
EPI_ISL_1970426	Maharashtra	2021-03-31	21A	B.1.617.1	G	Kappa	VOI
EPI_ISL_1970427	Maharashtra	2021-04-05	21A	B.1.617.2	G	Delta	VOC
EPI_ISL_1970428	Maharashtra	2021-04-06	21A	B.1.617.1	G	Kappa	VOI
EPI_ISL_1970429	Maharashtra	2021-04-07	21A	B.1.617.2	G	Delta	VOC
EPI_ISL_1970430	Maharashtra	2021-04-07	21A	B.1.617.1	G	Kappa	VOI
EPI_ISL_1970431	Maharashtra	2021-04-08	21A	B.1.617.2	G	Delta	VOC
EPI_ISL_1970432	Maharashtra	2021-04-12	21A	B.1.617.1	G	Kappa	VOI
EPI_ISL_1970433	Maharashtra	2021-04-13	21A	B.1.617.2	G	Delta	VOC
EPI_ISL_1970434	Maharashtra	2021-04-13	21A	B.1.617.2	G	Delta	VOC
EPI_ISL_1970435	Maharashtra	2021-04-15	21A	B.1.617.2	G	Delta	VOC
EPI_ISL_1970436	Maharashtra	2021-04-15	21A	B.1.617.1	G	Kappa	VOI
EPI_ISL_1970437	Maharashtra	2021-04-18	21A	B.1.617.2	G	Delta	VOC
EPI_ISL_1970438	Maharashtra	2021-04-16	21A	B.1.617.2	G	Delta	VOC
EPI_ISL_1970439	Maharashtra	2021-04-17	21A	B.1.617.2	G	Delta	VOC
EPI_ISL_1970440	Maharashtra	2021-04-17	21A	B.1.617.2	G	Delta	VOC
EPI_ISL_1970441	Maharashtra	2021-04-17	21A	B.1.617.2	G	Delta	VOC
EPI_ISL_1970442	Maharashtra	2021-04-21	21A	B.1.617.2	G	Delta	VOC
EPI_ISL_1970444	Maharashtra	2021-04-22	21A	B.1.617.2	G	Delta	VOC
EPI_ISL_1970445	Maharashtra	2021-04-17	21A	B.1.617.2	G	Delta	VOC
EPI_ISL_1970446	Maharashtra	2021-04-19	21A	B.1.617.1	G	Kappa	VOI
EPI_ISL_1970447	Maharashtra	2021-04-19	21A	B.1.617.2	G	Delta	VOC
EPI_ISL_1970448	Maharashtra	2021-04-20	21A	B.1.617.2	G	Delta	VOC
EPI_ISL_1970449	Maharashtra	2021-04-20	21A	B.1.617.2	G	Delta	VOC
EPI_ISL_1970450	Maharashtra	2021-04-20	21A	B.1.617.2	G	Delta	VOC
EPI_ISL_1970451	Maharashtra	2021-04-21	21A	B.1.617.2	G	Delta	VOC
EPI_ISL_1970452	Maharashtra	2021-04-21	21A	B.1.617.2	G	Delta	VOC
EPI_ISL_1970453	Gujarat	2021-04-18	21A	B.1.617.2	G	Delta	VOC
EPI_ISL_1970454	Gujarat	2021-04-22	21A	B.1.617.2	G	Delta	VOC
EPI_ISL_1970455	Gujarat	2021-04-17	21A	B.1.617.2	G	Delta	VOC
EPI_ISL_1970456	Gujarat	2021-04-18	21A	B.1.617.2	G	Delta	VOC
EPI_ISL_1970457	Gujarat	2021-04-23	21A	B.1.617.2	G	Delta	VOC
EPI_ISL_1970458	Gujarat	2021-04-16	21A	B.1.617.2	G	Delta	VOC
EPI_ISL_1970459	Gujarat	2021-04-24	21A	B.1.617.2	G	Delta	VOC
EPI_ISL_1970460	Gujarat	2021-04-18	21A	B.1.617.1	G	Kappa	VOI
EPI_ISL_1970461	Gujarat	2021-04-18	21A	B.1.617.2	G	Delta	VOC
EPI_ISL_1970462	Gujarat	2021-04-24	21A	B.1.617.2	G	Delta	VOC
EPI_ISL_1970463	Gujarat	2021-04-18	21A	B.1.617.2	G	Delta	VOC
EPI_ISL_1970464	Gujarat	2021-04-18	21A	B.1.617.2	G	Delta	VOC
EPI_ISL_1970465	Gujarat	2021-04-18	21A	B.1.617.2	G	Delta	VOC
EPI_ISL_1970466	Gujarat	2021-04-18	21A	B.1.617.2	G	Delta	VOC
EPI_ISL_1970467	Gujarat	2021-04-18	21A	B.1.617.2	G	Delta	VOC
EPI_ISL_1970468	Gujarat	2021-04-18	21A	B.1.617.2	G	Delta	VOC
EPI_ISL_1970470	Gujarat	2021-04-18	21A	B.1.617.2	G	Delta	VOC
EPI_ISL_1970471	Gujarat	2021-04-18	21A	B.1.617.2	G	Delta	VOC
EPI_ISL_1970472	Gujarat	2021-04-18	21A	B.1.617.2	G	Delta	VOC
EPI_ISL_1970473	Gujarat	2021-04-18	21A	B.1.617.2	G	Delta	VOC
EPI_ISL_1970474	Gujarat	2021-04-18	21A	B.1.617.2	G	Delta	VOC
EPI_ISL_1970475	Gujarat	2021-04-18	21A	B.1.617.2	G	Delta	VOC
EPI_ISL_1970476	Gujarat	2021-04-18	21A	B.1.617.2	G	Delta	VOC
EPI_ISL_1970477	Gujarat	2021-04-18	21A	B.1.617.2	G	Delta	VOC
EPI_ISL_1970478	Gujarat	2021-04-18	21A	B.1.617.2	G	Delta	VOC
EPI_ISL_1970479	Gujarat	2021-04-18	21A	B.1.617.2	G	Delta	VOC
EPI_ISL_1970480	Gujarat	2021-04-18	21A	B.1.617.2	G	Delta	VOC
EPI_ISL_1970481	Gujarat	2021-04-18	21A	B.1.617.2	G	Delta	VOC
EPI_ISL_1970482	Gujarat	2021-04-18	21A	B.1.617.2	G	Delta	VOC
EPI_ISL_1970483	Gujarat	2021-04-18	21A	B.1	G	Others	NA
EPI_ISL_1970484	Gujarat	2021-04-17	21A	B.1.617.2	G	Delta	VOC
EPI_ISL_1970486	Gujarat	2021-04-17	21A	B.1.617.2	G	Delta	VOC
EPI_ISL_1970487	Gujarat	2021-04-18	21A	B.1.617.1	G	Kappa	VOI
EPI_ISL_1970488	Gujarat	2021-04-18	21A	B.1.617.2	G	Delta	VOC
EPI_ISL_1970489	Gujarat	2021-04-18	21A	B.1.617.2	G	Delta	VOC
EPI_ISL_1970490	Gujarat	2021-04-18	21A	B.1.617.1	G	Kappa	VOI
EPI_ISL_1970491	Gujarat	2021-04-19	21A	B.1.617.2	G	Delta	VOC
EPI_ISL_1970492	Gujarat	2021-04-18	21A	B.1.617.2	G	Delta	VOC
EPI_ISL_1970493	Gujarat	2021-04-17	21A	B.1.617.2	G	Delta	VOC
EPI_ISL_1970494	Gujarat	2021-04-18	21A	B.1.617.2	G	Delta	VOC
EPI_ISL_1970495	Gujarat	2021-04-19	21A	B.1.617.2	G	Delta	VOC
EPI_ISL_1970496	Gujarat	2021-04-17	21A	B.1.617.2	G	Delta	VOC
EPI_ISL_1970497	Gujarat	2021-04-18	21A	B.1.617.2	G	Delta	VOC
EPI_ISL_1970498	Gujarat	2021-04-23	21A	B.1.617.3	G	Others	NA
EPI_ISL_2001200	Gujarat	2021-04-01	20I/501Y.V1	B.1.1.7	GRY	Alpha	VOC
EPI_ISL_2001201	Gujarat	2021-04-03	21A	B.1.617.2	G	Delta	VOC
EPI_ISL_2001202	Gujarat	2021-04-03	20A	B.1.153	G	Others	NA
EPI_ISL_2001203	Gujarat	2021-04-03	21A	B.1.36.8	G	Others	NA
EPI_ISL_2001204	Gujarat	2021-04-03	20A	B.1.153	GV	Others	NA
EPI_ISL_2001205	Gujarat	2021-04-04	21A	B.1.617.1	G	Kappa	VOI
EPI_ISL_2001206	Gujarat	2021-04-04	21A	B.1.153	G	Others	NA
EPI_ISL_2001207	Gujarat	2021-03-27	21A	B.1.617.1	G	Kappa	VOI
EPI_ISL_2001208	Gujarat	2021-03-27	21A	B.1.153	G	Others	NA
EPI_ISL_2001209	Gujarat	2021-03-27	20I/501Y.V1	B.1.1.7	GRY	Alpha	VOC
EPI_ISL_2100198	Tamil_Nadu	2021-03-10	20I/501Y.V1	B.1.1.7	GR	Alpha	VOC
EPI_ISL_2106734	Rajasthan	2020-09-18	20A	B.1.36	GH	Others	NA
EPI_ISL_2106740	Rajasthan	2020-09-19	20B	B.1.1.406	GR	Others	NA
EPI_ISL_2106741	Rajasthan	2020-09-19	20B	B.1.1.216	GR	Others	NA
EPI_ISL_2106742	Rajasthan	2020-09-19	20B	B.1.1.216	GR	Others	NA
EPI_ISL_2106743	Rajasthan	2020-09-19	20A	B.1.36.31	GH	Others	NA
EPI_ISL_2106744	Rajasthan	2020-09-19	20B	B.1.1	GR	Others	NA
EPI_ISL_2106745	Rajasthan	2020-09-20	20A	B.1	G	Others	NA
EPI_ISL_2106746	Rajasthan	2020-09-20	20A	B.1.36	GH	Others	NA
EPI_ISL_2106747	Rajasthan	2020-09-20	20B	B.1.1.216	GR	Others	NA
EPI_ISL_2106748	Rajasthan	2020-09-20	20A	B.1.36	GH	Others	NA
EPI_ISL_2106749	Rajasthan	2020-09-21	20B	B.1.1.216	GR	Others	NA
EPI_ISL_2106750	Rajasthan	2020-09-21	20B	B.1.1.216	GR	Others	NA
EPI_ISL_2106751	Rajasthan	2020-09-21	20B	B.1.1.216	GR	Others	NA
EPI_ISL_2106752	Rajasthan	2020-09-21	20B	B.1.1	GR	Others	NA
EPI_ISL_2106753	Rajasthan	2020-09-21	19B	A	S	Others	NA
EPI_ISL_2106754	Rajasthan	2020-09-21	20A	B.1.36.8	GH	Others	NA
EPI_ISL_2106755	Rajasthan	2020-09-21	20A	B.1.210	G	Others	NA
EPI_ISL_2106756	Rajasthan	2020-09-21	20B	B.1.1.306	GR	Others	NA
EPI_ISL_2106757	Rajasthan	2020-09-22	20A	B.1.36	GH	Others	NA
EPI_ISL_2106758	Rajasthan	2020-09-22	20A	B.1.36.31	GH	Others	NA
EPI_ISL_2106759	Rajasthan	2020-09-22	20A	B.1.36	GH	Others	NA
EPI_ISL_2106760	Rajasthan	2020-09-22	19B	A.21	S	Others	NA
EPI_ISL_2106761	Rajasthan	2020-09-22	20B	B.1.1	GR	Others	NA
EPI_ISL_2106762	Rajasthan	2020-09-22	20B	B.1.1	GR	Others	NA
EPI_ISL_2106763	Rajasthan	2020-09-22	20A	B.1.36	GH	Others	NA
EPI_ISL_2106764	Rajasthan	2020-09-22	20A	B.1	G	Others	NA
EPI_ISL_2106765	Rajasthan	2020-09-22	20A	B.1	G	Others	NA
EPI_ISL_2106766	Rajasthan	2020-09-22	20B	B.1.1	GR	Others	NA
EPI_ISL_2106767	Rajasthan	2020-09-22	20A	B.1.36.8	GH	Others	NA
EPI_ISL_2106768	Rajasthan	2020-09-22	20B	B.1.1.326	GR	Others	NA
EPI_ISL_2106769	Rajasthan	2020-09-22	20B	B.1.1	GR	Others	NA
EPI_ISL_2151301	Karnataka	2021	21A	B.1.617.2	G	Delta	VOC
EPI_ISL_2151302	Karnataka	2021	21A	B.1.617.2	G	Delta	VOC
EPI_ISL_2151303	Karnataka	2021	21A	B.1.617.1	G	Kappa	VOI
EPI_ISL_2151304	Karnataka	2021	21A	B.1.617.2	G	Delta	VOC
EPI_ISL_2151305	Karnataka	2021	21A	B.1.617.2	G	Delta	VOC
EPI_ISL_2151306	Karnataka	2021	21A	B.1.617.2	G	Delta	VOC
EPI_ISL_2151307	Karnataka	2021	21A	B.1.617.2	G	Delta	VOC
EPI_ISL_2151309	Karnataka	2021	21A	B.1.617.2	G	Delta	VOC
EPI_ISL_2151311	Karnataka	2021	21A	B.1.617.2	G	Delta	VOC
EPI_ISL_2151312	Karnataka	2021	21A	B.1.617.2	G	Delta	VOC
EPI_ISL_2151313	Karnataka	2021	21A	B.1.617.2	G	Delta	VOC
EPI_ISL_2151314	Karnataka	2021	21A	B.1.617.1	G	Kappa	VOI
EPI_ISL_2151315	Karnataka	2021	21A	B.1.617.2	G	Delta	VOC
EPI_ISL_2151316	Karnataka	2021	21A	B.1.617.2	G	Delta	VOC
EPI_ISL_2157021	Telangana	2021-03-18	21A	B.1.617.2	G	Delta	VOC
EPI_ISL_2157024	Telangana	2021-03-18	20I/501Y.V1	B.1.1.7	GR	Alpha	VOC
EPI_ISL_2157026	Telangana	2021-03-18	20I/501Y.V1	B.1.1.7	GR	Alpha	VOC
EPI_ISL_2157029	Telangana	2021-03-18	20A	B.1.525	G	Eta	VOI
EPI_ISL_2157030	Telangana	2021-03-18	20I/501Y.V1	B.1.1.7	GR	Alpha	VOC
EPI_ISL_2157031	Telangana	2021-03-18	20I/501Y.V1	B.1.1.7	GR	Alpha	VOC
EPI_ISL_2157036	Telangana	2021-04-19	21A	B.1.617.2	G	Delta	VOC
EPI_ISL_2157037	Telangana	2021-04-19	21A	B.1.617.2	G	Delta	VOC
EPI_ISL_2157038	Telangana	2021-04-19	21A	B.1.617.2	G	Delta	VOC
EPI_ISL_2157039	Telangana	2021-04-19	21A	B.1.617.2	G	Delta	VOC
EPI_ISL_2157041	Telangana	2021-04-19	21A	B.1.617.1	G	Kappa	VOI
EPI_ISL_2157042	Telangana	2021-04-19	21A	B.1.617.1	G	Kappa	VOI
EPI_ISL_2157043	Telangana	2021-03-18	21A	B.1.617.1	G	Kappa	VOI
EPI_ISL_2157044	Telangana	2021-04-19	21A	B.1.617.2	G	Delta	VOC
EPI_ISL_2157045	Telangana	2021-04-19	21A	B.1	G	Others	NA
EPI_ISL_2157046	Telangana	2021-04-19	21A	B.1.617.2	G	Delta	VOC
EPI_ISL_2157047	Telangana	2021-04-19	21A	B.1.617.2	G	Delta	VOC
EPI_ISL_2157048	Telangana	2021-04-19	21A	B.1.617.3	G	Others	NA
EPI_ISL_2157049	Telangana	2021-04-19	20A	B.1.36.29	GH	Others	NA
EPI_ISL_2157052	Telangana	2021-04-19	21A	B.1.617.1	G	Kappa	VOI
EPI_ISL_2157054	Telangana	2021-04-19	21A	B.1.617.2	G	Delta	VOC
EPI_ISL_2157055	Telangana	2021-04-19	21A	B.1.617.1	G	Kappa	VOI
EPI_ISL_2157059	Telangana	2021-04-19	21A	B.1.617.1	G	Kappa	VOI
EPI_ISL_2157061	Telangana	2021-04-19	21A	B.1.617.1	G	Kappa	VOI
EPI_ISL_2157064	Telangana	2021-04-19	21A	B.1.617.1	G	Kappa	VOI
EPI_ISL_2157065	Telangana	2021-04-19	21A	B.1.617.2	G	Delta	VOC
EPI_ISL_2157069	Telangana	2021-04-19	21A	B.1.617.1	G	Kappa	VOI
EPI_ISL_2157070	Telangana	2021-04-19	21A	B.1.617.1	G	Kappa	VOI
EPI_ISL_2157073	Telangana	2021-04-19	20A	B.1.525	G	Eta	VOI
EPI_ISL_2157074	Telangana	2021-04-19	20H/501Y.V2	B.1.351	GH	Beta	VOC
EPI_ISL_2157075	Telangana	2021-04-19	20H/501Y.V2	B.1.351	GH	Beta	VOC
EPI_ISL_2157076	Telangana	2021-04-20	21A	B.1.617.2	G	Delta	VOC
EPI_ISL_2157078	Telangana	2021-04-20	21A	B.1.617.2	G	Delta	VOC
EPI_ISL_2157083	Telangana	2021-04-20	21A	B.1.617.1	G	Kappa	VOI
EPI_ISL_2157086	Telangana	2021-04-20	20H/501Y.V2	B.1.351	GH	Beta	VOC
EPI_ISL_2157092	Telangana	2021-04-21	21A	B.1.617.2	G	Delta	VOC
EPI_ISL_2157096	Telangana	2021-04-21	21A	B.1	G	Others	NA
EPI_ISL_2157099	Telangana	2021-04-21	21A	B.1.617.2	G	Delta	VOC
EPI_ISL_2162402	Maharashtra	2021-03	20A	B.1.36	GH	Others	NA
EPI_ISL_2162429	Maharashtra	2021-03-28	21A	B.1.617.2	G	Delta	VOC
EPI_ISL_2162446	Maharashtra	2021-03-30	21A	B.1.617.1	G	Kappa	VOI
EPI_ISL_2162447	Maharashtra	2021-03-30	21A	B.1.617.1	G	Kappa	VOI
EPI_ISL_2162448	Maharashtra	2021-03-28	21A	B.1.617.1	G	Kappa	VOI
EPI_ISL_1838502	Andhra_Pradesh	2021-03-24	21A	B.1.617.1	G	Kappa	VOI
EPI_ISL_1838520	Andhra_Pradesh	2021-03-24	20I/501Y.V1	B.1.1	GR	Others	NA
EPI_ISL_1838522	Andhra_Pradesh	2021-03-24	20D	C.36	GR	Others	NA
EPI_ISL_1838525	Andhra_Pradesh	2021-03-24	21A	B.1.617.1	G	Kappa	VOI
EPI_ISL_1838526	Andhra_Pradesh	2021-03-24	21A	B.1.617.1	G	Kappa	VOI
EPI_ISL_1838545	Andhra_Pradesh	2021-03-26	21A	B.1.617.3	G	Others	NA
EPI_ISL_1838546	Andhra_Pradesh	2021-03-26	21A	B.1.617.1	G	Kappa	VOI
EPI_ISL_1838550	Andhra_Pradesh	2021-03-26	20B	B.1.1.306	GR	Others	NA
EPI_ISL_1838551	Andhra_Pradesh	2021-03-26	20I/501Y.V1	B.1.1.7	GR	Alpha	VOC
EPI_ISL_1838552	Andhra_Pradesh	2021-03-26	21A	B.1.617.3	G	Others	NA
EPI_ISL_1838553	Andhra_Pradesh	2021-03-26	20A	B.1.1	G	Others	NA
EPI_ISL_1916470	Maharashtra	2021-02-15	20I/501Y.V1	B.1.1.7	GRY	Alpha	VOC
EPI_ISL_1916473	Maharashtra	2021-03-07	21A	B.1.617.1	G	Kappa	VOI
EPI_ISL_1916474	Maharashtra	2021-03-13	21A	B.1.617.1	G	Kappa	VOI
EPI_ISL_1916475	Maharashtra	2021-03-17	21A	B.1.617.2	G	Delta	VOC
EPI_ISL_1916477	Maharashtra	2021-03-21	21A	B.1.617.1	G	Kappa	VOI
EPI_ISL_1916479	Maharashtra	2021-03-25	21A	B.1.617.1	G	Kappa	VOI
EPI_ISL_1916486	Maharashtra	2021-03-18	21A	B.1.617.2	G	Delta	VOC
EPI_ISL_1916488	Maharashtra	2021-03-22	21A	B.1.617.1	G	Kappa	VOI
EPI_ISL_1916489	Maharashtra	2021-03-23	21A	B.1.617.2	G	Delta	VOC
EPI_ISL_1916491	Maharashtra	2020-11-27	20A	B.1.1.306	GR	Others	NA
EPI_ISL_1916492	Maharashtra	2020-11-28	20A	B.1.36	GH	Others	NA
EPI_ISL_1916493	Maharashtra	2020-11-29	20A	B.1.608	G	Others	NA
EPI_ISL_1916494	Maharashtra	2020-11-30	20B	B.1.1.411	GR	Others	NA
EPI_ISL_1916495	Maharashtra	2020-11-23	20B	B.1.1.306	GR	Others	NA
EPI_ISL_1916496	Maharashtra	2020-11-24	20A	B.1.1.5	G	Others	NA
EPI_ISL_1916497	Maharashtra	2020-11-25	20A	B	G	Others	NA
EPI_ISL_1916498	Maharashtra	2020-11-26	20A	B.1.153	G	Others	NA
EPI_ISL_1928451	Maharashtra	2021-03-22	20A	B.1.1.306	GR	Others	NA
EPI_ISL_1928453	Maharashtra	2021-03-22	21A	B.1.617.1	G	Kappa	VOI
EPI_ISL_1928454	Maharashtra	2021-03-23	21A	B.1.617.1	G	Kappa	VOI
EPI_ISL_1928457	Maharashtra	2021-03-23	21A	B.1	G	Others	NA
EPI_ISL_1928459	Maharashtra	2021-03-23	21A	B.1.617.3	G	Others	NA
EPI_ISL_1928460	Maharashtra	2021-03-23	21A	B.1.617.1	G	Kappa	VOI
EPI_ISL_1928462	Maharashtra	2021-03-27	21A	B.1.617.2	G	Delta	VOC
EPI_ISL_1928463	Maharashtra	2021-03-29	20A	B.1.1.306	GR	Others	NA
EPI_ISL_1928464	Maharashtra	2021-03-29	20B	B.1.1.216	GR	Others	NA
EPI_ISL_1928465	Maharashtra	2021-03-29	20A	B.1.36.33	GH	Others	NA
EPI_ISL_1928467	Maharashtra	2021-03-29	21A	B.1.617.1	G	Kappa	VOI
EPI_ISL_1928468	Maharashtra	2021-03-29	21A	B.1.617.1	G	Kappa	VOI
EPI_ISL_1928469	Maharashtra	2021-03-29	20B	B.1.1.306	GR	Others	NA
EPI_ISL_1928471	Maharashtra	2021-03-29	21A	N.9	GR	Others	NA
EPI_ISL_1928472	Maharashtra	2021-03-29	21A	B.1.617.1	G	Kappa	VOI
EPI_ISL_1928474	Maharashtra	2021-03-29	21A	B.1.617.1	G	Kappa	VOI
EPI_ISL_1928477	Maharashtra	2021-03-29	21A	B.1	G	Others	NA
EPI_ISL_1928478	Maharashtra	2021-03-29	21A	B.1.617.1	G	Kappa	VOI
EPI_ISL_1928481	Maharashtra	2021-03-29	21A	B.1.617.1	G	Kappa	VOI
EPI_ISL_1928485	Maharashtra	2021-03-30	20A	B.1.36.29	GH	Others	NA
EPI_ISL_1928487	Maharashtra	2021-03-30	20I/501Y.V1	B.1.1.7	GR	Alpha	VOC
EPI_ISL_1928490	Maharashtra	2021-03-30	21A	B.1.617.1	G	Kappa	VOI
EPI_ISL_1928510	Gujarat	2021-04-07	21A	B.1.617.3	G	Others	NA
EPI_ISL_1928515	Gujarat	2021-04-10	21A	B.1.617.2	G	Delta	VOC
EPI_ISL_1928517	Gujarat	2021-04-11	21A	B.1.617.1	G	Kappa	VOI
EPI_ISL_1928530	Gujarat	2021-04-17	21A	B.1.617.2	G	Delta	VOC
EPI_ISL_1928533	Gujarat	2021-04-17	21A	B.1.617.1	G	Kappa	VOI
EPI_ISL_1928534	Gujarat	2021-04-17	21A	B.1.617.2	G	Delta	VOC
EPI_ISL_1928536	Gujarat	2021-04-17	21A	B.1.617.2	G	Delta	VOC
EPI_ISL_1928537	Gujarat	2021-04-17	21A	B.1.617.2	G	Delta	VOC
EPI_ISL_1928541	Maharashtra	2021-04-18	21A	B.1.617.2	G	Delta	VOC
EPI_ISL_1928546	Gujarat	2021-04-18	21A	B.1	G	Others	NA
EPI_ISL_1928549	Gujarat	2021-04-18	21A	B.1.617.2	G	Delta	VOC
EPI_ISL_1928550	Gujarat	2021-04-18	21A	B.1.617.2	G	Delta	VOC
EPI_ISL_1928552	Gujarat	2021-04-18	21A	B.1.617.2	G	Delta	VOC
EPI_ISL_1928553	Gujarat	2021-04-18	21A	B.1.617.2	G	Delta	VOC
EPI_ISL_1928555	Gujarat	2021-04-18	21A	B.1.617.2	G	Delta	VOC
EPI_ISL_1928558	Gujarat	2021-04-18	21A	B.1.617.2	G	Delta	VOC
EPI_ISL_1928561	Gujarat	2021-04-18	21A	B.1.245	G	Others	NA
EPI_ISL_1928563	Gujarat	2021-04-18	21A	B.1.617.1	G	Kappa	VOI
EPI_ISL_1928565	Gujarat	2021-04-18	21A	B.1.617.2	G	Delta	VOC
EPI_ISL_1928566	Gujarat	2021-04-18	21A	B.1	G	Others	NA
EPI_ISL_1928568	Gujarat	2021-04-18	21A	B.1.617.2	G	Delta	VOC
EPI_ISL_1928569	Gujarat	2021-04-18	21A	B.1.617.2	G	Delta	VOC
EPI_ISL_1940131	Karnataka	2021-04-06	20A	B.1.36.10	G	Others	NA
EPI_ISL_1970088	Delhi	2021-04-01	20I/501Y.V1	B.1.1.7	GRY	Alpha	VOC
EPI_ISL_2001170	Gujarat	2021-02-20	20A	B.1.36	GH	Others	NA
EPI_ISL_2001171	Gujarat	2021-02-20	20A	B.1.36	GH	Others	NA
EPI_ISL_2001172	Gujarat	2021-02-20	20I/501Y.V1	B.1.1.7	GRY	Alpha	VOC
EPI_ISL_2001173	Gujarat	2021-02-20	20I/501Y.V1	B.1.1.7	GRY	Alpha	VOC
EPI_ISL_2001174	Gujarat	2021-02-20	20I/501Y.V1	B.1.1.7	GRY	Alpha	VOC
EPI_ISL_2001175	Haryana	2021-02-20	20I/501Y.V1	B.1.1.7	GRY	Alpha	VOC
EPI_ISL_2001176	Haryana	2021-02-20	20I/501Y.V1	B.1.1.7	GRY	Alpha	VOC
EPI_ISL_2001177	Gujarat	2021-02-20	20I/501Y.V1	B.1.1.7	GRY	Alpha	VOC
EPI_ISL_2001178	Gujarat	2021-03-27	20I/501Y.V1	B.1.1.7	GRY	Alpha	VOC
EPI_ISL_2001179	Gujarat	2021-03-27	20I/501Y.V1	B.1.1.7	GRY	Alpha	VOC
EPI_ISL_2001180	Gujarat	2021-03-30	21A	B.1.618	G	Others	NA
EPI_ISL_2001181	Gujarat	2021-04-01	21A	N.9	GR	Others	NA
EPI_ISL_2001182	Gujarat	2021-04-01	21A	B.1.1	GR	Others	NA
EPI_ISL_2001183	Gujarat	2021-04-02	21A	B.1.36.8	G	Others	NA
EPI_ISL_2001184	Gujarat	2021-04-02	20A	B.1	G	Others	NA
EPI_ISL_2001185	Gujarat	2021-04-02	21A	B.1.617.2	G	Delta	VOC
EPI_ISL_2001186	Gujarat	2021-04-02	21A	B.1.153	G	Others	NA
EPI_ISL_2001187	Gujarat	2021-03-30	21A	B.1.617.2	G	Delta	VOC
EPI_ISL_2001188	Gujarat	2021-03-30	21A	B.1.153	G	Others	NA
EPI_ISL_2001189	Gujarat	2021-03-30	21A	B.1.617.2	G	Delta	VOC
EPI_ISL_2001190	Gujarat	2021-03-30	21A	B.1.153	G	Others	NA
EPI_ISL_2001191	Gujarat	2021-03-31	21A	B.1.617.2	G	Delta	VOC
EPI_ISL_2001192	Gujarat	2021-03-31	21A	B.1.153	G	Others	NA
EPI_ISL_2001193	Gujarat	2021-03-31	21A	B.1.617.2	G	Delta	VOC
EPI_ISL_2001194	Gujarat	2021-03-31	21A	B.1.153	G	Others	NA
EPI_ISL_2001195	Gujarat	2021-04-01	21A	B.1.617.2	G	Delta	VOC
EPI_ISL_2001196	Gujarat	2021-04-01	21A	B.1.153	G	Others	NA
EPI_ISL_2001197	Gujarat	2021-04-01	21A	B.1.617.1	G	Kappa	VOI
EPI_ISL_2001198	Gujarat	2021-04-01	21A	B.1.153	G	Others	NA
EPI_ISL_2001199	Gujarat	2021-04-01	20I/501Y.V1	B.1.1.7	GRY	Alpha	VOC
EPI_ISL_2100187	Tamil_Nadu	2021-04-16	21A	B.1.617.2	G	Delta	VOC
EPI_ISL_2100188	Tamil_Nadu	2021-04-09	21A	B.1	O	Others	NA
EPI_ISL_2100189	Tamil_Nadu	2020-05-24	20B	B.1.1.46	GR	Others	NA
EPI_ISL_2100190	Tamil_Nadu	2021-04-17	21A	B.1	G	Others	NA
EPI_ISL_2100191	Tamil_Nadu	2020-05-19	20A	B.1	O	Others	NA
EPI_ISL_2100192	Tamil_Nadu	2021-04-16	21A	B.1.617.1	G	Kappa	VOI
EPI_ISL_2100193	Tamil_Nadu	2021-03-12	20I/501Y.V1	B.1.1.7	GR	Alpha	VOC
EPI_ISL_2100194	Tamil_Nadu	2020-05-24	20B	B.1.1.46	GR	Others	NA
EPI_ISL_2100195	Tamil_Nadu	2021-04-09	21A	B.1	G	Others	NA
EPI_ISL_2100196	Tamil_Nadu	2020-05-13	20B	B.1.1	GR	Others	NA
EPI_ISL_2100197	Tamil_Nadu	2021-03-10	20I/501Y.V1	B.1.1.7	GR	Alpha	VOC
EPI_ISL_2106700	Rajasthan	2020-09-15	20B	B.1.1	GR	Others	NA
EPI_ISL_2106701	Rajasthan	2020-09-15	20A	B.1.36.8	GH	Others	NA
EPI_ISL_2106702	Rajasthan	2020-09-15	20A	B.1.36.8	GH	Others	NA
EPI_ISL_2106703	Rajasthan	2020-09-16	20B	B.1.1.216	GR	Others	NA
EPI_ISL_2106704	Rajasthan	2020-09-16	20B	B.1.1	GR	Others	NA
EPI_ISL_2106705	Rajasthan	2020-09-16	20A	B.1	G	Others	NA
EPI_ISL_2106706	Rajasthan	2020-09-16	20A	B.1	G	Others	NA
EPI_ISL_2106707	Rajasthan	2020-09-16	20A	B.1	G	Others	NA
EPI_ISL_2106708	Rajasthan	2020-09-16	20B	B.1.1	GR	Others	NA
EPI_ISL_2106709	Rajasthan	2020-09-16	20A	B.1.36.8	GH	Others	NA
EPI_ISL_2106710	Rajasthan	2020-09-16	20B	B.1.1.216	GR	Others	NA
EPI_ISL_2106711	Rajasthan	2020-09-17	20B	B.1.1.44	GR	Others	NA
EPI_ISL_2106712	Rajasthan	2020-09-17	20A	B.1.36	GH	Others	NA
EPI_ISL_2106713	Rajasthan	2020-09-17	20B	B.1.1.216	GR	Others	NA
EPI_ISL_2106714	Rajasthan	2020-09-17	20B	B.1.1	GR	Others	NA
EPI_ISL_2106715	Rajasthan	2020-09-17	20A	B.1	G	Others	NA
EPI_ISL_2106716	Rajasthan	2020-09-17	20B	B.1.1.216	GR	Others	NA
EPI_ISL_2106717	Rajasthan	2020-09-17	20A	B.1.36	GH	Others	NA
EPI_ISL_2106718	Rajasthan	2020-09-17	20A	B.1	G	Others	NA
EPI_ISL_2106719	Rajasthan	2020-09-17	20A	B.1.36	GH	Others	NA
EPI_ISL_2106720	Rajasthan	2020-09-17	20B	B.1.1.216	GR	Others	NA
EPI_ISL_2106721	Rajasthan	2020-09-17	20A	B.1.36.8	GH	Others	NA
EPI_ISL_2106722	Rajasthan	2020-09-17	20B	B.1.1.216	GR	Others	NA
EPI_ISL_2106723	Rajasthan	2020-09-18	20A	B.1.36	GH	Others	NA
EPI_ISL_2106724	Rajasthan	2020-09-18	20B	B.1.1	GR	Others	NA
EPI_ISL_2106725	Rajasthan	2020-09-18	20A	B.1	G	Others	NA
EPI_ISL_2106726	Rajasthan	2020-09-18	20A	B.1.36	GH	Others	NA
EPI_ISL_2106727	Rajasthan	2020-09-18	20A	B.1.36	G	Others	NA
EPI_ISL_2106728	Rajasthan	2020-09-18	20A	B.1	G	Others	NA
EPI_ISL_2106729	Rajasthan	2020-09-18	20B	B.1.1.216	GR	Others	NA
EPI_ISL_2106730	Rajasthan	2020-09-18	20A	B.1	G	Others	NA
EPI_ISL_2106731	Rajasthan	2020-09-18	20B	B.1.1.216	GR	Others	NA
EPI_ISL_2106732	Rajasthan	2020-09-18	20A	B.1	G	Others	NA
EPI_ISL_2106733	Rajasthan	2020-09-18	20B	B.1.1.216	GR	Others	NA
EPI_ISL_2106735	Rajasthan	2020-09-19	20A	B.1.36.8	GH	Others	NA
EPI_ISL_2106736	Rajasthan	2020-09-19	20A	B.1.36	GH	Others	NA
EPI_ISL_2106737	Rajasthan	2020-09-19	20B	B.1.1	GR	Others	NA
EPI_ISL_2106738	Rajasthan	2020-09-19	20A	B.1.36.8	GH	Others	NA
EPI_ISL_2106739	Rajasthan	2020-09-19	20A	B.1.36.8	GH	Others	NA
EPI_ISL_2132672	West_Bengal	2021-01-11	20B	B.1.1	GR	Others	NA
EPI_ISL_2132675	West_Bengal	2020-12-01	20A	B.1.36	GH	Others	NA
EPI_ISL_2132676	West_Bengal	2021-01-21	20A	B.1.540	G	Others	NA
EPI_ISL_2132677	West_Bengal	2020-12-01	20B	B.1.1.216	GR	Others	NA
EPI_ISL_2132678	Mizoram	2020-12-29	20A	B.1.36	GH	Others	NA
EPI_ISL_2132680	West_Bengal	2021-02-10	20B	B.1.1	GR	Others	NA
EPI_ISL_2132681	West_Bengal	2021-02-06	20B	B.1.1	GR	Others	NA
EPI_ISL_2132683	West_Bengal	2021-02-09	20A	B.1.36	GH	Others	NA
EPI_ISL_2132685	West_Bengal	2021-02-13	20B	B.1.1.216	GR	Others	NA
EPI_ISL_2132687	West_Bengal	2021-01-30	20B	B.1.1	GR	Others	NA
EPI_ISL_2132690	West_Bengal	2020-09-01	20A	B.1	G	Others	NA
EPI_ISL_2132691	West_Bengal	2020-09-01	20A	B.1	G	Others	NA
EPI_ISL_2157000	Telangana	2021-04-17	21A	B.1.617.2	GV	Delta	VOC
EPI_ISL_2157001	Telangana	2021-04-17	21A	B.1.617.2	G	Delta	VOC
EPI_ISL_2157005	Telangana	2021-04-17	21A	B.1.617.1	G	Kappa	VOI
EPI_ISL_2157006	Telangana	2021-04-17	21A	B.1.617.1	G	Kappa	VOI
EPI_ISL_2157008	Telangana	2021-04-17	21A	B.1.617.1	G	Kappa	VOI
EPI_ISL_2157010	Telangana	2021-04-18	21A	B.1.617.2	G	Delta	VOC
EPI_ISL_2157012	Telangana	2021-04-18	20I/501Y.V1	B.1.1	G	Others	NA
EPI_ISL_2157013	Telangana	2021-04-18	20A	B.1.1	G	Others	NA
EPI_ISL_2157014	Telangana	2021-04-18	21A	B.1.617.1	G	Kappa	VOI
EPI_ISL_2157016	Telangana	2021-04-18	21A	B.1.617.1	G	Kappa	VOI
EPI_ISL_2157017	Telangana	2021-04-18	21A	B.1.617.2	G	Delta	VOC
EPI_ISL_2157019	Telangana	2021-03-18	21A	B.1.459	G	Others	NA
EPI_ISL_2189590	Gujarat	2021-03-31	21A	B.1.617.1	G	Kappa	VOI
EPI_ISL_2189591	Gujarat	2021-03-24	20B	B.1.1.216	GR	Others	NA
EPI_ISL_2189592	Gujarat	2021-03-24	21A	B.1.617.1	G	Kappa	VOI
EPI_ISL_2189593	Gujarat	2021-03-26	20I/501Y.V1	B.1.1.7	GRY	Alpha	VOC
EPI_ISL_2189594	Gujarat	2021-04-01	20I/501Y.V1	B.1.1.7	GRY	Alpha	VOC
EPI_ISL_2189595	Gujarat	2021-03-24	20A	B.1.36	GH	Others	NA
EPI_ISL_2189596	Gujarat	2021-03-24	21A	B.1.617.2	G	Delta	VOC
EPI_ISL_2189597	Gujarat	2021-03-26	20I/501Y.V1	B.1.1.7	GRY	Alpha	VOC
EPI_ISL_2189598	Gujarat	2021-03-31	20I/501Y.V1	B.1.1.7	GRY	Alpha	VOC
EPI_ISL_2225600	Delhi	2020-12-10	20B	B.1.1.216	GR	Others	NA
EPI_ISL_2272477	Delhi	2021	21A	B.1.617.2	G	Delta	VOC
EPI_ISL_2272479	Delhi	2021	21A	B.1.617.2	G	Delta	VOC
EPI_ISL_2272480	Delhi	2021	21A	B.1.617.2	G	Delta	VOC
EPI_ISL_2272481	Delhi	2021	21A	B.1.617.2	G	Delta	VOC
EPI_ISL_2272482	West_Bengal	2021	21A	B.1.617.1	G	Kappa	VOI
EPI_ISL_2272483	West_Bengal	2021	21A	B.1.617.2	G	Delta	VOC
EPI_ISL_2272484	West_Bengal	2021	21A	B.1.617.2	G	Delta	VOC
EPI_ISL_2272485	West_Bengal	2021	21A	B.1.617.1	G	Kappa	VOI
EPI_ISL_2272486	West_Bengal	2021	21A	B.1.617.2	G	Delta	VOC
EPI_ISL_2272487	West_Bengal	2021	21A	B.1.617.2	G	Delta	VOC
EPI_ISL_2272488	West_Bengal	2021	21A	B.1.617.1	G	Kappa	VOI
EPI_ISL_2272489	West_Bengal	2021	21A	B.1.617.2	G	Delta	VOC
EPI_ISL_2272490	Maharashtra	2021	20A	B.1.36	GH	Others	NA
EPI_ISL_2272491	Tamil_Nadu	2021	21A	B.1.617.1	G	Kappa	VOI
EPI_ISL_2272492	Madhya_Pradesh	2021	21A	B.1	G	Others	NA
EPI_ISL_2272493	Madhya_Pradesh	2021	21A	B.1	G	Others	NA
EPI_ISL_2272494	Madhya_Pradesh	2021	21A	B.1.617.2	G	Delta	VOC
EPI_ISL_2272495	Madhya_Pradesh	2021	21A	B.1.617.2	G	Delta	VOC
EPI_ISL_2272496	Madhya_Pradesh	2021	21A	B.1	G	Others	NA
EPI_ISL_2272834	Puducherry	2021-04-23	21A	B.1.617.2	G	Delta	VOC
EPI_ISL_2272835	Puducherry	2021-04-23	21A	B.1.617.2	G	Delta	VOC
EPI_ISL_2272836	Puducherry	2021-04-23	21A	B.1.617.2	G	Delta	VOC
EPI_ISL_2272838	Puducherry	2021-04-23	21A	B.1.617.2	G	Delta	VOC
EPI_ISL_2272839	Puducherry	2021-04-24	21A	B.1.617.2	G	Delta	VOC
EPI_ISL_2272840	Puducherry	2021-04-24	21A	B.1.617.2	G	Delta	VOC
EPI_ISL_2272841	Puducherry	2021-04-24	21A	B.1.617.2	G	Delta	VOC
EPI_ISL_2272842	Puducherry	2021-04-24	20I/501Y.V1	B.1.1.7	GR	Alpha	VOC
EPI_ISL_2272843	Puducherry	2021-04-24	21A	B.1.617.2	G	Delta	VOC
EPI_ISL_2272844	Puducherry	2021-04-24	21A	B.1.617.2	G	Delta	VOC
EPI_ISL_2272845	Puducherry	2021-04-26	21A	B.1.617.2	G	Delta	VOC
EPI_ISL_2272846	Puducherry	2021-04-26	21A	B.1.617.2	G	Delta	VOC
EPI_ISL_2272849	Puducherry	2021-04-26	21A	B.1.617.2	G	Delta	VOC
EPI_ISL_2272850	Puducherry	2021-04-26	21A	B.1.617.2	G	Delta	VOC
EPI_ISL_2272851	Puducherry	2021-04-27	21A	B.1.617.2	G	Delta	VOC
EPI_ISL_2272852	Puducherry	2021-04-28	21A	B.1.617.2	G	Delta	VOC
EPI_ISL_2272853	Puducherry	2021-04-28	21A	B.1.617.2	G	Delta	VOC
EPI_ISL_2272854	Puducherry	2021-04-28	21A	B.1.617.2	G	Delta	VOC
EPI_ISL_2272855	Puducherry	2021-05-03	21A	B.1.617.2	G	Delta	VOC
EPI_ISL_2272856	Puducherry	2021-04-20	21A	B.1.617.2	G	Delta	VOC
EPI_ISL_2272857	Puducherry	2021-04-23	21A	B.1.617.2	G	Delta	VOC
EPI_ISL_2272858	Puducherry	2021-04-24	21A	B.1.617.2	G	Delta	VOC
EPI_ISL_2272859	Puducherry	2021-04-26	21A	B.1.617.2	G	Delta	VOC
EPI_ISL_2272860	Puducherry	2021-04-26	21A	B.1.617.2	G	Delta	VOC
EPI_ISL_2272861	Puducherry	2021-04-28	21A	B.1.617.2	G	Delta	VOC
EPI_ISL_2272862	Puducherry	2021-04-20	21A	B.1.617.2	G	Delta	VOC
EPI_ISL_2272863	Puducherry	2021-04-20	21A	B.1.617.2	G	Delta	VOC
EPI_ISL_2272864	Puducherry	2021-04-21	21A	B.1.617.2	G	Delta	VOC
EPI_ISL_2272865	Puducherry	2021-04-23	21A	B.1.617.2	G	Delta	VOC
EPI_ISL_2272866	Puducherry	2021-04-23	21A	B.1.617.2	G	Delta	VOC
EPI_ISL_2272868	Puducherry	2021-04-26	21A	B.1.617.2	G	Delta	VOC
EPI_ISL_2272869	Puducherry	2021-04-26	21A	B.1.617.2	G	Delta	VOC
EPI_ISL_2272870	Puducherry	2021-04-27	21A	B.1.617.2	G	Delta	VOC
EPI_ISL_2272871	Puducherry	2021-04-29	21A	B.1.617.2	G	Delta	VOC
EPI_ISL_2272872	Tamil_Nadu	2021-04-30	21A	B.1.617.2	G	Delta	VOC
EPI_ISL_2272873	Puducherry	2021-05-03	21A	B.1.617.2	G	Delta	VOC
EPI_ISL_2272875	Puducherry	2021-04-22	21A	B.1.617.1	G	Kappa	VOI
EPI_ISL_2272876	Puducherry	2021-04-27	21A	B.1.617.2	G	Delta	VOC
EPI_ISL_2272877	Puducherry	2021-04-28	21A	B.1.617.2	G	Delta	VOC
EPI_ISL_2272878	Puducherry	2021-04-18	21A	B.1.617.2	G	Delta	VOC
EPI_ISL_2272879	Andhra_Pradesh	2021-04-19	21A	B.1.617.2	G	Delta	VOC
EPI_ISL_2272880	Puducherry	2021-04-20	21A	B.1.617.1	G	Kappa	VOI
EPI_ISL_2272882	Puducherry	2021-04-29	21A	B.1.617.2	G	Delta	VOC
EPI_ISL_2272883	Puducherry	2021-05-03	21A	B.1.617.2	G	Delta	VOC
EPI_ISL_2272884	Puducherry	2021-05-03	21A	B.1.617.2	G	Delta	VOC
EPI_ISL_2272885	Puducherry	2021-05-03	21A	B.1.617.2	G	Delta	VOC
EPI_ISL_2272886	Puducherry	2021-04-24	21A	B.1.617.2	G	Delta	VOC
EPI_ISL_2272887	Puducherry	2021-04-26	21A	B.1.617.2	G	Delta	VOC
EPI_ISL_2272888	Puducherry	2021-04-28	21A	B.1.617.2	G	Delta	VOC
EPI_ISL_1838100	Maharashtra	2021-04-06	21A	B.1.617.1	G	Kappa	VOI
EPI_ISL_1838102	Maharashtra	2021-04-06	21A	B.1.617.1	G	Kappa	VOI
EPI_ISL_1838106	Maharashtra	2021-04-06	21A	B.1	G	Others	NA
EPI_ISL_1838109	Maharashtra	2021-04-06	21A	B.1.617.2	G	Delta	VOC
EPI_ISL_1838114	Maharashtra	2021-04-06	21A	B.1.617.2	G	Delta	VOC
EPI_ISL_1838117	Maharashtra	2021-04-06	21A	B.1.617.1	G	Kappa	VOI
EPI_ISL_1838119	Maharashtra	2021-04-06	21A	B.1.617.1	G	Kappa	VOI
EPI_ISL_1838122	Maharashtra	2021-04-06	21A	B.1.617.1	G	Kappa	VOI
EPI_ISL_1838123	Maharashtra	2021-04-03	21A	B.1	G	Others	NA
EPI_ISL_1838125	Maharashtra	2021-04-03	21A	B.1.617.2	G	Delta	VOC
EPI_ISL_1838131	Maharashtra	2021-03-15	21A	B.1.617.3	G	Others	NA
EPI_ISL_1838132	Maharashtra	2021-03-15	21A	B.1.617.1	G	Kappa	VOI
EPI_ISL_1838134	Maharashtra	2021-03-15	21A	B.1.617.2	G	Delta	VOC
EPI_ISL_1838136	Maharashtra	2021-03-15	21A	B.1.617.1	G	Kappa	VOI
EPI_ISL_1838140	Maharashtra	2021-03-15	20I/501Y.V1	B.1.1.7	GR	Alpha	VOC
EPI_ISL_1838142	Maharashtra	2021-03-15	20B	B.1.1.306	GR	Others	NA
EPI_ISL_1838143	Maharashtra	2021-03-15	21A	B.1.617.1	G	Kappa	VOI
EPI_ISL_1838148	Maharashtra	2021-03-17	21A	B.1.617.1	G	Kappa	VOI
EPI_ISL_1838151	Maharashtra	2021-03-17	21A	B.1.617.2	G	Delta	VOC
EPI_ISL_1838152	Maharashtra	2021-03-17	21A	B.1.617.1	G	Kappa	VOI
EPI_ISL_1838155	Maharashtra	2021-03-17	21A	B.1.617.1	G	Kappa	VOI
EPI_ISL_1838156	Maharashtra	2021-03-17	21A	B.1.617.1	G	Kappa	VOI
EPI_ISL_1838158	Maharashtra	2021-03-17	21A	B.1.617.1	G	Kappa	VOI
EPI_ISL_1838159	Maharashtra	2021-03-17	21A	B.1.617.1	G	Kappa	VOI
EPI_ISL_1838168	Maharashtra	2021-03-19	21A	B.1.617.1	G	Kappa	VOI
EPI_ISL_1838173	Maharashtra	2021-03-19	21A	B.1.617.1	G	Kappa	VOI
EPI_ISL_1838176	Maharashtra	2021-03-19	20B	B.1.1	GR	Others	NA
EPI_ISL_1838179	Maharashtra	2021-03-20	21A	B.1.617.1	G	Kappa	VOI
EPI_ISL_1838543	Andhra_Pradesh	2021-03-26	20I/501Y.V1	B.1.1.7	GR	Alpha	VOC
EPI_ISL_1838547	Andhra_Pradesh	2021-03-26	21A	B.1.617.1	G	Kappa	VOI
EPI_ISL_1838548	Andhra_Pradesh	2021-03-26	20I/501Y.V1	B.1.1.7	GR	Alpha	VOC
EPI_ISL_1838577	Andhra_Pradesh	2021-03-26	21A	B.1.617.1	G	Kappa	VOI
EPI_ISL_1838578	Andhra_Pradesh	2021-03-26	20I/501Y.V1	B.1.1.7	GR	Alpha	VOC
EPI_ISL_1838580	Andhra_Pradesh	2021-03-26	20I/501Y.V1	B.1.1.7	GR	Alpha	VOC
EPI_ISL_1838581	Andhra_Pradesh	2021-03-26	21A	B.1.617.1	G	Kappa	VOI
EPI_ISL_1838583	Andhra_Pradesh	2021-03-26	21A	B.1.617.1	G	Kappa	VOI
EPI_ISL_1838588	Andhra_Pradesh	2021-03-26	20A	B.1.36.29	GH	Others	NA
EPI_ISL_1838593	Andhra_Pradesh	2021-03-31	20I/501Y.V1	B.1.1.7	GR	Alpha	VOC
EPI_ISL_1838594	Andhra_Pradesh	2021-03-31	21A	B.1.617.1	G	Kappa	VOI
EPI_ISL_1841300	Maharashtra	2020-11-25	20B	B.1.1.216	GR	Others	NA
EPI_ISL_1841301	Maharashtra	2020-11-25	20B	B.1.1	GR	Others	NA
EPI_ISL_1841302	Maharashtra	2020-11-24	20B	B.1.1.326	GR	Others	NA
EPI_ISL_1841303	Maharashtra	2020-11-25	20A	B.1.36.29	GH	Others	NA
EPI_ISL_1841304	Maharashtra	2020-11-26	20A	B.1.36	GH	Others	NA
EPI_ISL_1841305	Maharashtra	2021-03-05	20A	B.1.36.29	GH	Others	NA
EPI_ISL_1841306	Maharashtra	2021-03-06	21A	B.1.617.1	G	Kappa	VOI
EPI_ISL_1841307	Maharashtra	2021-03-06	21A	B.1.617.1	G	Kappa	VOI
EPI_ISL_1841308	Maharashtra	2021-03-06	21A	B.1.617.1	G	Kappa	VOI
EPI_ISL_1841309	Maharashtra	2021-03-20	21A	B.1.617.1	G	Kappa	VOI
EPI_ISL_1841310	Maharashtra	2021-03-20	21A	B.1.617.1	G	Kappa	VOI
EPI_ISL_1841311	Maharashtra	2021-03-20	21A	B.1.617.1	G	Kappa	VOI
EPI_ISL_1841312	Maharashtra	2021-03-20	21A	B.1.617.1	G	Kappa	VOI
EPI_ISL_1841313	Maharashtra	2021-03-20	21A	B.1.617.1	G	Kappa	VOI
EPI_ISL_1841314	Maharashtra	2021-03-06	21A	B.1.617.1	G	Kappa	VOI
EPI_ISL_1841315	Maharashtra	2021-03-06	21A	B.1.617.1	G	Kappa	VOI
EPI_ISL_1841316	Maharashtra	2021-03-06	21A	B.1.617.1	G	Kappa	VOI
EPI_ISL_1841317	Maharashtra	2021-03-20	21A	B.1.617.2	G	Delta	VOC
EPI_ISL_1841318	Maharashtra	2021-03-18	21A	B.1.617.2	G	Delta	VOC
EPI_ISL_1841319	Maharashtra	2021-03-05	20A	B.1.36.29	GH	Others	NA
EPI_ISL_1841320	Maharashtra	2021-03-06	21A	B.1.617.1	G	Kappa	VOI
EPI_ISL_1841321	Maharashtra	2021-03-17	20B	B.1.1.216	GR	Others	NA
EPI_ISL_1841322	Maharashtra	2021-02-06	20A	B.1.36	GH	Others	NA
EPI_ISL_1841323	Maharashtra	2021-02-19	20B	B.1.1.306	GR	Others	NA
EPI_ISL_1841324	Maharashtra	2021-03-30	20A	B.1.1.306	GR	Others	NA
EPI_ISL_1841326	Maharashtra	2021-03-08	20A	B.1.1.306	GR	Others	NA
EPI_ISL_1841328	Maharashtra	2021-03-29	21A	B.1.617.1	G	Kappa	VOI
EPI_ISL_1841329	Maharashtra	2021-03-24	21A	B.1.617.1	G	Kappa	VOI
EPI_ISL_1841334	Maharashtra	2021-03-17	21A	B.1.617.1	G	Kappa	VOI
EPI_ISL_1841335	Maharashtra	2021-03-09	21A	B.1.617.1	G	Kappa	VOI
EPI_ISL_1841336	Maharashtra	2021-03-29	21A	B.1.617.1	G	Kappa	VOI
EPI_ISL_1841337	Maharashtra	2021-03-29	21A	B.1.617.1	G	Kappa	VOI
EPI_ISL_1841338	Maharashtra	2021-03-29	21A	B.1.617.1	G	Kappa	VOI
EPI_ISL_1841339	Maharashtra	2021-03-15	21A	B.1.617.1	G	Kappa	VOI
EPI_ISL_1841340	Maharashtra	2021-03-17	21A	B.1.617.1	G	Kappa	VOI
EPI_ISL_1841341	Maharashtra	2021-03-17	21A	B.1.617.1	G	Kappa	VOI
EPI_ISL_1841342	Maharashtra	2021-03-14	21A	B.1.617.1	G	Kappa	VOI
EPI_ISL_1841343	Maharashtra	2021-03-30	21A	B.1.617.1	G	Kappa	VOI
EPI_ISL_1841344	Maharashtra	2021-02-22	21A	B.1.617.1	G	Kappa	VOI
EPI_ISL_1841345	Maharashtra	2021-03-16	21A	B.1.617.1	G	Kappa	VOI
EPI_ISL_1841346	Maharashtra	2021-03-01	21A	B.1.617.1	G	Kappa	VOI
EPI_ISL_1841347	Maharashtra	2021-03-12	21A	B.1.617.1	G	Kappa	VOI
EPI_ISL_1841348	Maharashtra	2021-03-30	21A	B.1.617.1	G	Kappa	VOI
EPI_ISL_1841349	Maharashtra	2021-03-20	21A	B.1.617.1	G	Kappa	VOI
EPI_ISL_1928500	Maharashtra	2021-04-02	21A	B.1.617.1	G	Kappa	VOI
EPI_ISL_1928502	Maharashtra	2021-04-02	20B	B.1.1.464	GR	Others	NA
EPI_ISL_1928503	Maharashtra	2021-04-05	21A	B.1.617.1	G	Kappa	VOI
EPI_ISL_1928505	Maharashtra	2021-04-06	20A	B.1.1.306	GR	Others	NA
EPI_ISL_1928506	Gujarat	2021-04-06	21A	B.1.617.2	G	Delta	VOC
EPI_ISL_1928507	Gujarat	2021-04-07	21A	B.1.617.2	G	Delta	VOC
EPI_ISL_1928509	Gujarat	2021-04-07	21A	B.1.617.2	G	Delta	VOC
EPI_ISL_1928522	Maharashtra	2021-04-17	21A	B.1.617.2	G	Delta	VOC
EPI_ISL_1928525	Maharashtra	2021-04-17	21A	B.1.617.2	G	Delta	VOC
EPI_ISL_2001116	Gujarat	2020-12-21	20A	B.1.36	GH	Others	NA
EPI_ISL_2001117	Gujarat	2020-12-15	20A	B.1.36	GH	Others	NA
EPI_ISL_2001118	Gujarat	2020-12-15	20A	B.1.36	GH	Others	NA
EPI_ISL_2001119	Gujarat	2020-12-16	20A	B.1.36.8	GH	Others	NA
EPI_ISL_2001120	Gujarat	2020-12-16	20A	B.1.36.8	GH	Others	NA
EPI_ISL_2001121	Gujarat	2021-03-12	21A	B.1.617.1	G	Kappa	VOI
EPI_ISL_2001122	Gujarat	2021-03-12	21A	B.1.153	G	Others	NA
EPI_ISL_2001123	Gujarat	2021-03-12	21A	B.1.617.1	G	Kappa	VOI
EPI_ISL_2001124	Gujarat	2021-03-16	21A	B.1.617.1	G	Kappa	VOI
EPI_ISL_2001125	Gujarat	2021-03-17	21A	B.1.617.1	G	Kappa	VOI
EPI_ISL_2001126	Gujarat	2021-03-17	21A	B.1.153	G	Others	NA
EPI_ISL_2001127	Gujarat	2021-03-20	20I/501Y.V1	B.1.1.7	GRY	Alpha	VOC
EPI_ISL_2001128	Gujarat	2021-03-20	20I/501Y.V1	B.1.1.7	GRY	Alpha	VOC
EPI_ISL_2001129	Gujarat	2021-03-20	20I/501Y.V1	B.1.1.7	GRY	Alpha	VOC
EPI_ISL_2001130	Gujarat	2021-03-21	21A	B.1.617.1	G	Kappa	VOI
EPI_ISL_2001131	Gujarat	2021-03-21	21A	B.1.153	G	Others	NA
EPI_ISL_2001132	Gujarat	2021-03-21	20I/501Y.V1	B.1.1.7	GRY	Alpha	VOC
EPI_ISL_2001133	Gujarat	2021-03-21	20I/501Y.V1	B.1.1.7	GRY	Alpha	VOC
EPI_ISL_2001134	Gujarat	2021-03-21	20I/501Y.V1	B.1.1.7	GRY	Alpha	VOC
EPI_ISL_2001135	Gujarat	2021-03-22	21A	B.1	G	Others	NA
EPI_ISL_2001136	Gujarat	2021-03-22	20A	B.1	G	Others	NA
EPI_ISL_2001137	Gujarat	2021-03-22	21A	B.1.617.1	G	Kappa	VOI
EPI_ISL_2001138	Gujarat	2021-03-22	21A	B.1.153	G	Others	NA
EPI_ISL_2001139	Gujarat	2021-03-22	21A	B.1.617.2	G	Delta	VOC
EPI_ISL_2001140	Gujarat	2021-03-22	21A	B.1.153	G	Others	NA
EPI_ISL_2001141	Gujarat	2021-03-22	20H/501Y.V2	B.1.351	GH	Beta	VOC
EPI_ISL_2001142	Gujarat	2021-03-22	20H/501Y.V2	B.1.351	GH	Beta	VOC
EPI_ISL_2001143	Gujarat	2021-03-22	21A	B.1.617.2	G	Delta	VOC
EPI_ISL_2001144	Gujarat	2021-03-22	21A	B.1.617.2	G	Delta	VOC
EPI_ISL_2001145	Gujarat	2021-03-22	20I/501Y.V1	B.1.1.7	GRY	Alpha	VOC
EPI_ISL_2001146	Gujarat	2021-03-22	20I/501Y.V1	B.1.1.7	GRY	Alpha	VOC
EPI_ISL_2001147	Gujarat	2021-03-22	20I/501Y.V1	B.1.1.7	GRY	Alpha	VOC
EPI_ISL_2001148	Gujarat	2021-03-22	20I/501Y.V1	B.1.1.7	GRY	Alpha	VOC
EPI_ISL_2001149	Gujarat	2020-12-19	20A	B.1.36	GH	Others	NA
EPI_ISL_2001160	Gujarat	2021-02-03	20A	B.1.36.29	GH	Others	NA
EPI_ISL_2001161	Gujarat	2021-02-03	20A	B.1.36	GH	Others	NA
EPI_ISL_2001162	Gujarat	2021-02-02	20H/501Y.V2	B.1.351	GH	Beta	VOC
EPI_ISL_2001163	Gujarat	2021-02-03	20A	B.1.36.10	G	Others	NA
EPI_ISL_2001164	Gujarat	2021-02-03	20A	B.1	GH	Others	NA
EPI_ISL_2001165	Gujarat	2021-02-06	20I/501Y.V1	B.1.1.7	GRY	Alpha	VOC
EPI_ISL_2001166	Delhi	2021-02-16	20I/501Y.V1	B.1.1.7	GRY	Alpha	VOC
EPI_ISL_2001167	Delhi	2021-02-16	20I/501Y.V1	B.1.1.7	GRY	Alpha	VOC
EPI_ISL_2001168	Gujarat	2021-02-19	20I/501Y.V1	B.1.1.7	GRY	Alpha	VOC
EPI_ISL_2001169	Gujarat	2021-02-19	20I/501Y.V1	B.1.1.7	GRY	Alpha	VOC
EPI_ISL_2013598	Gujarat	2021-02-20	20I/501Y.V1	B.1.1.7	GRY	Alpha	VOC
EPI_ISL_2100635	Delhi	2021-04-20	21A	B.1.617.2	G	Delta	VOC
EPI_ISL_2100636	Delhi	2021-04-22	21A	B.1.617.2	G	Delta	VOC
EPI_ISL_2100637	Delhi	2021-04-22	21A	B.1.617.2	G	Delta	VOC
EPI_ISL_2100643	Delhi	2021-04-24	21A	B.1.617.2	G	Delta	VOC
EPI_ISL_2100645	Delhi	2021-04-25	21A	B.1.617.2	G	Delta	VOC
EPI_ISL_2100646	Delhi	2021-04-26	21A	B.1.617.2	G	Delta	VOC
EPI_ISL_2100647	Delhi	2021-04-26	21A	B.1.617.2	G	Delta	VOC
EPI_ISL_2100648	Delhi	2021-04-26	21A	B.1.617.2	G	Delta	VOC
EPI_ISL_2100650	Delhi	2021-04-27	21A	B.1.617.2	G	Delta	VOC
EPI_ISL_2100651	Delhi	2021-04-27	21A	B.1.617.2	G	Delta	VOC
EPI_ISL_2100652	Delhi	2021-04-27	21A	B.1.617.2	G	Delta	VOC
EPI_ISL_2100655	Delhi	2021-04-29	21A	B.1.617.2	G	Delta	VOC
EPI_ISL_2100656	Delhi	2021-04-29	21A	B.1.617.2	G	Delta	VOC
EPI_ISL_2100658	Delhi	2021-04-29	21A	B.1.617.2	G	Delta	VOC
EPI_ISL_2100659	Delhi	2021-04-29	21A	B.1.617.2	G	Delta	VOC
EPI_ISL_2100660	Delhi	2021-04-26	21A	B.1.617.2	G	Delta	VOC
EPI_ISL_2100662	Delhi	2021-04-27	21A	B.1.617.2	G	Delta	VOC
EPI_ISL_2100664	Delhi	2021-04-28	21A	B.1.617.2	G	Delta	VOC
EPI_ISL_2100665	Delhi	2021-04-28	21A	B.1.617.2	G	Delta	VOC
EPI_ISL_2100668	Delhi	2021-04-24	21A	B.1	G	Others	NA
EPI_ISL_2106770	Rajasthan	2020-09-23	20B	B.1.1.216	GR	Others	NA
EPI_ISL_2106771	Rajasthan	2020-09-23	20A	B.1.36	GH	Others	NA
EPI_ISL_2106772	Rajasthan	2020-09-23	20A	B.1	G	Others	NA
EPI_ISL_2106773	Rajasthan	2020-09-23	20A	B.1	G	Others	NA
EPI_ISL_2106774	Rajasthan	2020-09-23	20B	B.1.1.216	GR	Others	NA
EPI_ISL_2106775	Rajasthan	2020-09-23	20A	B.1.36	GH	Others	NA
EPI_ISL_2106776	Rajasthan	2020-09-23	20A	B.1.36	GH	Others	NA
EPI_ISL_2106777	Rajasthan	2020-09-23	20B	B.1.1.216	GR	Others	NA
EPI_ISL_2106778	Rajasthan	2020-09-23	20A	B.1.36	GH	Others	NA
EPI_ISL_2106779	Rajasthan	2020-09-23	20A	B.1	G	Others	NA
EPI_ISL_2106780	Rajasthan	2020-09-23	20A	B.1.36	GH	Others	NA
EPI_ISL_2106781	Rajasthan	2020-09-23	20B	B.1.1	GR	Others	NA
EPI_ISL_2106782	Rajasthan	2020-09-23	20A	B.1.210	G	Others	NA
EPI_ISL_2106783	Rajasthan	2020-09-24	19B	A.21	S	Others	NA
EPI_ISL_2106784	Rajasthan	2020-09-24	20B	B.1.1.216	GR	Others	NA
EPI_ISL_2106785	Rajasthan	2020-09-24	20A	B.1.36	GH	Others	NA
EPI_ISL_2106786	Rajasthan	2020-09-24	20A	B.1.36	GH	Others	NA
EPI_ISL_2106787	Rajasthan	2020-09-24	20B	B.1.1	GR	Others	NA
EPI_ISL_2106788	Rajasthan	2020-09-24	20B	B.1.1.306	GR	Others	NA
EPI_ISL_2106789	Rajasthan	2020-09-25	20A	B.1.36	GH	Others	NA
EPI_ISL_2106790	Rajasthan	2020-09-25	20A	B.1	G	Others	NA
EPI_ISL_2106791	Rajasthan	2020-09-25	20B	B.1.1.306	GR	Others	NA
EPI_ISL_2106792	Rajasthan	2020-09-25	20B	B.1.1.216	GR	Others	NA
EPI_ISL_2106793	Rajasthan	2020-09-27	20B	B.1.1.306	GR	Others	NA
EPI_ISL_2106794	Rajasthan	2020-09-27	20B	B.1.1	GR	Others	NA
EPI_ISL_2106795	Rajasthan	2020-09-28	20A	B.1.36.17	GH	Others	NA
EPI_ISL_2106796	Rajasthan	2020-09-29	20A	B.1.36.8	GH	Others	NA
EPI_ISL_2106797	Rajasthan	2020-09-29	20B	B.1.1	GR	Others	NA
EPI_ISL_2106798	Rajasthan	2020-09-29	20B	B.1.1	GR	Others	NA
EPI_ISL_2106799	Rajasthan	2020-10-01	20B	B.1.1	GR	Others	NA
EPI_ISL_2151317	Karnataka	2021	21A	B.1.617.2	G	Delta	VOC
EPI_ISL_2151318	Karnataka	2021	21A	B.1.617.2	G	Delta	VOC
EPI_ISL_2151319	Karnataka	2021	21A	B.1.617.2	G	Delta	VOC
EPI_ISL_2151321	Karnataka	2021	21A	B.1.617.2	G	Delta	VOC
EPI_ISL_2151322	Karnataka	2021	21A	B.1.617.2	G	Delta	VOC
EPI_ISL_2151323	Karnataka	2021	21A	B.1.617.2	G	Delta	VOC
EPI_ISL_2151324	Karnataka	2021	21A	B.1.617.2	G	Delta	VOC
EPI_ISL_2151325	Karnataka	2021	20A	B.1	G	Others	NA
EPI_ISL_2151326	Karnataka	2021	21A	B.1.617.2	G	Delta	VOC
EPI_ISL_2151328	Karnataka	2021	21A	B.1.617.2	G	Delta	VOC
EPI_ISL_2151329	Karnataka	2021	21A	B.1.617.2	G	Delta	VOC
EPI_ISL_2151330	Karnataka	2021	21A	B.1.617.2	G	Delta	VOC
EPI_ISL_2151332	Karnataka	2021	21A	B.1.617.1	G	Kappa	VOI
EPI_ISL_2151333	Karnataka	2021	21A	B.1.617.2	G	Delta	VOC
EPI_ISL_2151334	Karnataka	2021	20I/501Y.V1	B.1.1.7	GR	Alpha	VOC
EPI_ISL_2162450	Maharashtra	2021-03-29	21A	B.1.617.1	G	Kappa	VOI
EPI_ISL_2162457	Maharashtra	2021-03-31	21A	B.1.617.1	G	Kappa	VOI
EPI_ISL_2162461	Maharashtra	2021-03-30	21A	B.1.617.2	G	Delta	VOC
EPI_ISL_2189568	Gujarat	2021-03-10	20B	B.1.1.306	GR	Others	NA
EPI_ISL_2189569	Gujarat	2021-03-24	20A	B.1.36	GH	Others	NA
EPI_ISL_2189570	Gujarat	2021-03-24	20I/501Y.V1	B.1.1.7	GRY	Alpha	VOC
EPI_ISL_2189572	Gujarat	2021-03-26	21A	B.1.617.2	G	Delta	VOC
EPI_ISL_2189573	Gujarat	2021-03-26	20I/501Y.V1	B.1.1.7	GRY	Alpha	VOC
EPI_ISL_2189574	Gujarat	2021-04-01	20I/501Y.V1	B.1.1.7	GRY	Alpha	VOC
EPI_ISL_2189575	Gujarat	2021-03-24	20B	B.1.1.306	GR	Others	NA
EPI_ISL_2189576	Gujarat	2021-03-24	20I/501Y.V1	B.1.1.7	GRY	Alpha	VOC
EPI_ISL_2189577	Gujarat	2021-03-26	20I/501Y.V1	B.1.1.7	GRY	Alpha	VOC
EPI_ISL_2189578	Gujarat	2021-03-27	20A	B.1.1.306	GR	Others	NA
EPI_ISL_2189579	Gujarat	2021-04-01	20A	B.1.36	GH	Others	NA
EPI_ISL_2189580	Gujarat	2021-03-24	20B	B.1.1.216	GR	Others	NA
EPI_ISL_2189581	Gujarat	2021-03-24	20A	B.1.36.8	GH	Others	NA
EPI_ISL_2189582	Gujarat	2021-03-24	21A	B.1.617.1	G	Kappa	VOI
EPI_ISL_2189583	Gujarat	2021-03-31	20I/501Y.V1	B.1.1.7	GRY	Alpha	VOC
EPI_ISL_2189584	Gujarat	2021-04-01	20A	B.1.36.29	GH	Others	NA
EPI_ISL_2189585	Gujarat	2021-03-24	20B	B.1.1.216	GR	Others	NA
EPI_ISL_2189586	Gujarat	2021-03-24	20I/501Y.V1	B.1.1.7	GRY	Alpha	VOC
EPI_ISL_2189587	Gujarat	2021-03-24	21A	B.1.617.1	G	Kappa	VOI
EPI_ISL_2189588	Gujarat	2021-03-26	20I/501Y.V1	B.1.1.7	GR	Alpha	VOC
EPI_ISL_2189589	Gujarat	2021-03-26	20I/501Y.V1	B.1.1.7	GRY	Alpha	VOC
EPI_ISL_2225632	Maharashtra	2021-04-10	21A	B.1.617.2	G	Delta	VOC
EPI_ISL_2225681	Maharashtra	2021-04-09	21A	B.1.617.2	G	Delta	VOC
EPI_ISL_2225696	Maharashtra	2021-04-14	21A	B.1.617.1	G	Kappa	VOI
EPI_ISL_2233667	Punjab	2021-04-02	21A	B.1.617.2	G	Delta	VOC
EPI_ISL_2272800	Tamil_Nadu	2021-04-28	21A	B.1.617.2	G	Delta	VOC
EPI_ISL_2272802	Puducherry	2021-04-29	21A	B.1.617.2	G	Delta	VOC
EPI_ISL_2272803	Puducherry	2021-04-29	21A	B.1.617.2	G	Delta	VOC
EPI_ISL_2272804	Puducherry	2021-05-01	21A	B.1.617.2	G	Delta	VOC
EPI_ISL_2272805	Puducherry	2021-05-02	21A	B.1.617.2	G	Delta	VOC
EPI_ISL_2272808	Puducherry	2021-05-02	21A	B.1.617.2	G	Delta	VOC
EPI_ISL_2272809	Puducherry	2021-05-03	21A	B.1.617.2	G	Delta	VOC
EPI_ISL_2272810	Puducherry	2021-05-03	21A	B.1.617.2	G	Delta	VOC
EPI_ISL_2272813	Puducherry	2021-04-16	20I/501Y.V1	B.1.1.7	GR	Alpha	VOC
EPI_ISL_2272814	Puducherry	2021-04-16	21A	B.1.617.2	G	Delta	VOC
EPI_ISL_2272815	Puducherry	2021-04-16	21A	B.1.617.2	G	Delta	VOC
EPI_ISL_2272816	Puducherry	2021-04-17	20I/501Y.V1	B.1.1.7	GR	Alpha	VOC
EPI_ISL_2272817	Puducherry	2021-04-17	21A	B.1.617.2	G	Delta	VOC
EPI_ISL_2272818	Puducherry	2021-04-17	21A	B.1.617.1	G	Kappa	VOI
EPI_ISL_2272819	Puducherry	2021-04-17	21A	B.1.617.2	G	Delta	VOC
EPI_ISL_2272820	Puducherry	2021-04-18	21A	B.1.617.2	G	Delta	VOC
EPI_ISL_2272821	Puducherry	2021-04-18	21A	B.1.617.2	G	Delta	VOC
EPI_ISL_2272889	Tamil_Nadu	2021-05-01	21A	B.1.617.2	G	Delta	VOC
EPI_ISL_2272891	Puducherry	2021-04-15	20I/501Y.V1	B.1.1.7	GR	Alpha	VOC
EPI_ISL_2272892	Tamil_Nadu	2021-04-19	20I/501Y.V1	B.1.1.7	GR	Alpha	VOC
EPI_ISL_2272893	Puducherry	2021-04-15	21A	B.1.617.2	G	Delta	VOC
EPI_ISL_2272894	Puducherry	2021-04-15	20I/501Y.V1	B.1.1.7	GR	Alpha	VOC
EPI_ISL_2272895	Puducherry	2021-04-15	21A	B.1.617.2	G	Delta	VOC
EPI_ISL_2272896	Puducherry	2021-04-15	21A	B.1.617.1	G	Kappa	VOI
EPI_ISL_2272897	Puducherry	2021-04-16	21A	B.1.617.2	G	Delta	VOC
EPI_ISL_2272899	Puducherry	2021-04-16	21A	B.1.617.2	G	Delta	VOC
EPI_ISL_1818586	Karnataka	2021-03-18	21A	B.1.617.1	G	Kappa	VOI
EPI_ISL_1818590	Karnataka	2021-03-23	21A	B.1	G	Others	NA
EPI_ISL_1818594	Karnataka	2021-03-23	20I/501Y.V1	B.1.1.7	GR	Alpha	VOC
EPI_ISL_1818595	Karnataka	2021-03-22	20I/501Y.V1	B.1.1.7	GR	Alpha	VOC
EPI_ISL_1818598	Karnataka	2021-03-24	20I/501Y.V1	B.1.1.7	GR	Alpha	VOC
EPI_ISL_1838162	Maharashtra	2021-03-16	21A	B.1.617.1	G	Kappa	VOI
EPI_ISL_1838164	Maharashtra	2021-03-17	21A	B.1.617.1	G	Kappa	VOI
EPI_ISL_1838165	Maharashtra	2021-03-17	21A	B.1.617.1	G	Kappa	VOI
EPI_ISL_1838169	Maharashtra	2021-03-19	21A	B.1.617.1	G	Kappa	VOI
EPI_ISL_1838185	Maharashtra	2021-03-20	21A	B.1.617.1	G	Kappa	VOI
EPI_ISL_1838186	Maharashtra	2021-03-20	21A	B.1.617.1	G	Kappa	VOI
EPI_ISL_1838188	Maharashtra	2021-03-20	21A	B.1.617.1	G	Kappa	VOI
EPI_ISL_1838189	Maharashtra	2021-03-20	21A	B.1.393	G	Others	NA
EPI_ISL_1838194	Maharashtra	2021-03-20	21A	B.1.617.2	G	Delta	VOC
EPI_ISL_1838195	Maharashtra	2021-03-20	21A	B.1.617.1	G	Kappa	VOI
EPI_ISL_1838198	Maharashtra	2021-03-20	21A	B.1.617.1	G	Kappa	VOI
EPI_ISL_1841330	Maharashtra	2021-03-05	21A	B.1.617.1	G	Kappa	VOI
EPI_ISL_1841331	Maharashtra	2021-03-20	21A	B.1.617.1	G	Kappa	VOI
EPI_ISL_1841332	Maharashtra	2021-03-29	21A	B.1.617.1	G	Kappa	VOI
EPI_ISL_1841333	Maharashtra	2021-03-20	21A	B.1.617.1	G	Kappa	VOI
EPI_ISL_1841350	Maharashtra	2021-03-20	21A	B.1.617.1	G	Kappa	VOI
EPI_ISL_1841351	Maharashtra	2021-03-29	21A	B.1.617.1	G	Kappa	VOI
EPI_ISL_1841352	Maharashtra	2021-03-20	21A	B.1.617.1	G	Kappa	VOI
EPI_ISL_1841353	Maharashtra	2021-03-22	21A	B.1.617.1	G	Kappa	VOI
EPI_ISL_1841354	Maharashtra	2021-04	21A	B.1.617.1	G	Kappa	VOI
EPI_ISL_1841355	Maharashtra	2021-03-13	21A	B.1.617.2	G	Delta	VOC
EPI_ISL_1841356	Maharashtra	2021-03-29	21A	B.1.617.2	G	Delta	VOC
EPI_ISL_1841357	Maharashtra	2021-03-31	21A	B.1.617.2	G	Delta	VOC
EPI_ISL_1841358	Maharashtra	2021-03-21	20I/501Y.V1	B.1.1.7	GRY	Alpha	VOC
EPI_ISL_1841359	Maharashtra	2021-03-01	20I/501Y.V1	B.1.1.7	GRY	Alpha	VOC
EPI_ISL_1841360	Maharashtra	2021-03-29	20I/501Y.V1	B.1.1.7	GRY	Alpha	VOC
EPI_ISL_1841361	Maharashtra	2021-03-30	20I/501Y.V1	B.1.1.7	GRY	Alpha	VOC
EPI_ISL_1841362	Maharashtra	2021-03-30	20I/501Y.V1	B.1.1.7	GRY	Alpha	VOC
EPI_ISL_1841363	Maharashtra	2021-03-30	20I/501Y.V1	B.1.1.7	GRY	Alpha	VOC
EPI_ISL_1841364	Maharashtra	2021-03-09	21A	B.1.617.1	G	Kappa	VOI
EPI_ISL_1841365	Maharashtra	2021-03-06	21A	B.1.617.2	G	Delta	VOC
EPI_ISL_1841366	Maharashtra	2021-03-06	21A	B.1.617.2	G	Delta	VOC
EPI_ISL_1841369	Maharashtra	2021-03-27	21A	B.1.617.1	G	Kappa	VOI
EPI_ISL_1841370	Maharashtra	2021-04-05	21A	B.1.617.2	G	Delta	VOC
EPI_ISL_1841372	Maharashtra	2021-04-23	21A	B.1.617.2	G	Delta	VOC
EPI_ISL_1841373	Maharashtra	2021-04-24	21A	B.1.617.2	G	Delta	VOC
EPI_ISL_1841375	Maharashtra	2021-04-23	21A	B.1.617.2	G	Delta	VOC
EPI_ISL_1841377	Maharashtra	2021-03-08	21A	B.1.617.1	G	Kappa	VOI
EPI_ISL_1841378	Maharashtra	2021-03-12	21A	B.1.617.1	G	Kappa	VOI
EPI_ISL_1841379	Maharashtra	2021-03-10	21A	B.1.617.1	G	Kappa	VOI
EPI_ISL_1841380	Maharashtra	2021-03-06	21A	B.1.617.1	G	Kappa	VOI
EPI_ISL_1841381	Maharashtra	2021-03-11	21A	B.1.617.1	G	Kappa	VOI
EPI_ISL_1841382	Maharashtra	2021-03-11	21A	B.1.617.2	G	Delta	VOC
EPI_ISL_1841383	Maharashtra	2021-03-12	21A	B.1.617.2	G	Delta	VOC
EPI_ISL_1970100	Delhi	2021-04-03	21A	B.1.617.2	G	Delta	VOC
EPI_ISL_1970102	Delhi	2021-04-07	21A	B.1.617.2	G	Delta	VOC
EPI_ISL_1970105	Delhi	2021-04-06	21A	B.1.617.2	G	Delta	VOC
EPI_ISL_1970109	Delhi	2021-04-07	21A	B.1.617.2	G	Delta	VOC
EPI_ISL_1970111	Delhi	2021-04-06	21A	B.1.617.2	G	Delta	VOC
EPI_ISL_1970114	Delhi	2021-04-05	21A	B.1.617.2	G	Delta	VOC
EPI_ISL_1970115	Delhi	2021-04-04	21A	B.1.617.1	G	Kappa	VOI
EPI_ISL_1970117	Jammu_and_Kashmir	2021-04-04	20I/501Y.V1	B.1.1.7	GRY	Alpha	VOC
EPI_ISL_1970118	Jammu_and_Kashmir	2021-04-04	21A	B.1.617.1	G	Kappa	VOI
EPI_ISL_1970122	Jammu_and_Kashmir	2021-04-05	20I/501Y.V1	B.1.1.7	GRY	Alpha	VOC
EPI_ISL_1970123	Jammu_and_Kashmir	2021-04-05	20I/501Y.V1	B.1.1.7	GRY	Alpha	VOC
EPI_ISL_1970127	Jammu_and_Kashmir	2021-04-06	21A	B.1.617.1	G	Kappa	VOI
EPI_ISL_1970131	Jammu_and_Kashmir	2021-04-06	20I/501Y.V1	B.1.1.7	GRY	Alpha	VOC
EPI_ISL_1970138	Jammu_and_Kashmir	2021-04-07	21A	B.1.617.1	G	Kappa	VOI
EPI_ISL_1970144	Delhi	2021-03-30	21A	B.1.617.1	G	Kappa	VOI
EPI_ISL_1970145	Delhi	2021-03-31	20I/501Y.V1	B.1.1.7	GRY	Alpha	VOC
EPI_ISL_1970146	Delhi	2021-03-31	20I/501Y.V1	B.1.1.7	GRY	Alpha	VOC
EPI_ISL_1970147	Delhi	2021-03-31	21A	B.1.617.1	G	Kappa	VOI
EPI_ISL_1970148	Delhi	2021-04-01	20I/501Y.V1	B.1.1.7	GRY	Alpha	VOC
EPI_ISL_1970149	Delhi	2021-04-01	21A	B.1.617.2	G	Delta	VOC
EPI_ISL_1970150	Delhi	2021-04-01	20I/501Y.V1	B.1.1.7	GRY	Alpha	VOC
EPI_ISL_1970151	Delhi	2021-04-01	21A	B.1.617.1	G	Kappa	VOI
EPI_ISL_1970152	Delhi	2021-04-01	20I/501Y.V1	B.1.1.7	GRY	Alpha	VOC
EPI_ISL_1970156	Delhi	2021-04-02	21A	B.1.617.1	G	Kappa	VOI
EPI_ISL_1970157	Delhi	2021-04-02	21A	B.1.617.2	G	Delta	VOC
EPI_ISL_1970158	Delhi	2021-04-02	21A	B.1.617.2	G	Delta	VOC
EPI_ISL_1970159	Delhi	2021-04-01	21A	B.1.617.2	G	Delta	VOC
EPI_ISL_1970160	Delhi	2021-04-02	21A	B.1.617.2	G	Delta	VOC
EPI_ISL_1970161	Delhi	2021-04-02	20I/501Y.V1	B.1.1.7	GRY	Alpha	VOC
EPI_ISL_1970162	Delhi	2021-04-03	20I/501Y.V1	B.1.1.7	GRY	Alpha	VOC
EPI_ISL_1970163	Delhi	2021-04-03	21A	B.1.617.2	G	Delta	VOC
EPI_ISL_1970164	Delhi	2021-04-03	21A	B.1.617.2	G	Delta	VOC
EPI_ISL_1970165	Delhi	2021-04-03	21A	B.1.617.1	G	Kappa	VOI
EPI_ISL_1970166	Delhi	2021-04-03	20I/501Y.V1	B.1.1.7	GRY	Alpha	VOC
EPI_ISL_1970167	Delhi	2021-04-03	20I/501Y.V1	B.1.1.7	GRY	Alpha	VOC
EPI_ISL_1970168	Delhi	2021-04-04	21A	B.1.617.2	G	Delta	VOC
EPI_ISL_1970169	Delhi	2021-04-04	21A	B.1.617.2	G	Delta	VOC
EPI_ISL_1970175	Himachal_Pradesh	2021-04-03	20I/501Y.V1	B.1.1.7	GRY	Alpha	VOC
EPI_ISL_1970178	Himachal_Pradesh	2021-04-03	20I/501Y.V1	B.1.1.7	GRY	Alpha	VOC
EPI_ISL_1970179	Himachal_Pradesh	2021-04-03	21A	B.1.617.2	G	Delta	VOC
EPI_ISL_1970530	Maharashtra	2021-04-26	21A	B.1.617.2	G	Delta	VOC
EPI_ISL_1970531	Maharashtra	2021-04-26	21A	B.1.617.2	G	Delta	VOC
EPI_ISL_1970532	Maharashtra	2021-04-26	21A	B.1.617.3	G	Others	NA
EPI_ISL_1970533	Maharashtra	2021-04-26	21A	B.1.617.1	G	Kappa	VOI
EPI_ISL_1970534	Maharashtra	2021-04-26	21A	B.1.617.2	G	Delta	VOC
EPI_ISL_1970535	Maharashtra	2021-04-26	21A	B.1.617.1	G	Kappa	VOI
EPI_ISL_1970536	Maharashtra	2021-04-03	21A	B.1.617.2	G	Delta	VOC
EPI_ISL_1970537	Maharashtra	2021-04-19	21A	B.1.617.1	G	Kappa	VOI
EPI_ISL_1970538	Maharashtra	2021-04-07	21A	B.1.617.2	G	Delta	VOC
EPI_ISL_1970539	Maharashtra	2021-04-19	21A	B.1.617.1	G	Kappa	VOI
EPI_ISL_1970540	Maharashtra	2021-04-16	21A	B.1.617.2	G	Delta	VOC
EPI_ISL_1970541	Maharashtra	2021-04-20	21A	B.1.617.2	G	Delta	VOC
EPI_ISL_1970542	Maharashtra	2021-04-21	21A	B.1.617.2	G	Delta	VOC
EPI_ISL_1970543	Maharashtra	2021-04-27	21A	B.1.617.2	G	Delta	VOC
EPI_ISL_1970544	Maharashtra	2021-04-29	21A	B.1.617.2	G	Delta	VOC
EPI_ISL_1970545	Maharashtra	2021-04-30	21A	B.1.617.2	G	Delta	VOC
EPI_ISL_1970546	Maharashtra	2021-04-30	21A	B.1.617.2	G	Delta	VOC
EPI_ISL_2000674	Kerala	2021-03-24	20A	B.1.1.306	GR	Others	NA
EPI_ISL_2000676	Kerala	2021-03-27	20I/501Y.V1	B.1.1.7	GR	Alpha	VOC
EPI_ISL_2000679	Kerala	2021-03-12	20B	B.1.1	GR	Others	NA
EPI_ISL_2001150	Gujarat	2020-12-19	20A	B.1.36	GH	Others	NA
EPI_ISL_2001151	Gujarat	2020-12-15	20A	B.1.36	GH	Others	NA
EPI_ISL_2001152	Gujarat	2020-12-15	20A	B.1.36	GH	Others	NA
EPI_ISL_2001153	Gujarat	2021-01-07	20I/501Y.V1	B.1.1.7	GRY	Alpha	VOC
EPI_ISL_2001154	Gujarat	2021-02-01	20A	B.1.36.29	GH	Others	NA
EPI_ISL_2001155	Gujarat	2021-02-01	20A	B.1.36.29	GH	Others	NA
EPI_ISL_2001156	Gujarat	2021-02-02	20H/501Y.V2	B.1.351	GH	Beta	VOC
EPI_ISL_2001157	Gujarat	2021-02-02	20H/501Y.V2	B.1.351	GH	Beta	VOC
EPI_ISL_2001158	Gujarat	2021-02-02	20H/501Y.V2	B.1.351	GH	Beta	VOC
EPI_ISL_2001159	Gujarat	2021-02-02	20H/501Y.V2	B.1.351	GH	Beta	VOC
EPI_ISL_2100200	Tamil_Nadu	2020-05-25	20B	B.1.1.201	GR	Others	NA
EPI_ISL_2100202	Tamil_Nadu	2021-03-02	20I/501Y.V1	B.1.1.7	GR	Alpha	VOC
EPI_ISL_2100203	Tamil_Nadu	2020-05-23	20B	B.1.1.46	GR	Others	NA
EPI_ISL_2100204	Tamil_Nadu	2020-05-14	20B	B.1	O	Others	NA
EPI_ISL_2100207	Tamil_Nadu	2020-05-14	20B	B.1	O	Others	NA
EPI_ISL_2100208	Tamil_Nadu	2021-01-13	20A	B.1.36	GH	Others	NA
EPI_ISL_2100209	Tamil_Nadu	2020-05-25	20B	B.1.1	GR	Others	NA
EPI_ISL_2100210	Tamil_Nadu	2020-05-24	20B	B.1	O	Others	NA
EPI_ISL_2100211	Tamil_Nadu	2020-05-14	20B	B.1.1	GR	Others	NA
EPI_ISL_2100212	Tamil_Nadu	2021-04-12	20I/501Y.V1	B.1.1.7	GR	Alpha	VOC
EPI_ISL_2100213	Tamil_Nadu	2020-05-25	20B	B.1.1	GR	Others	NA
EPI_ISL_2100214	Tamil_Nadu	2020-05-24	20B	B.1	O	Others	NA
EPI_ISL_2100216	Tamil_Nadu	2021-04-09	21A	B.1.617.2	G	Delta	VOC
EPI_ISL_2100217	Tamil_Nadu	2020-05-25	20B	B.1.1	GR	Others	NA
EPI_ISL_2100218	Tamil_Nadu	2020-05-23	20B	B.1.1.46	GR	Others	NA
EPI_ISL_2100670	Delhi	2021-04-26	21A	B.1	G	Others	NA
EPI_ISL_2100671	Delhi	2021-04-27	21A	B.1.617.2	G	Delta	VOC
EPI_ISL_2100672	Delhi	2021-04-29	21A	B.1.617.2	G	Delta	VOC
EPI_ISL_2100679	Delhi	2021-04-29	21A	B.1.617.2	G	Delta	VOC
EPI_ISL_2100681	Delhi	2021-04-29	21A	B.1.617.2	G	Delta	VOC
EPI_ISL_2100682	Delhi	2021-04-29	21A	B.1.617.2	G	Delta	VOC
EPI_ISL_2100687	Delhi	2021-04-29	21A	B.1.617.2	G	Delta	VOC
EPI_ISL_2100693	Delhi	2021-04-29	20A	B.1	O	Others	NA
EPI_ISL_2106800	Rajasthan	2020-09-30	20A	B.1	G	Others	NA
EPI_ISL_2106801	Rajasthan	2020-09-30	20B	B.1.1	GR	Others	NA
EPI_ISL_2106802	Rajasthan	2020-09-30	20B	B.1.1.44	GR	Others	NA
EPI_ISL_2106803	Rajasthan	2020-10-01	20B	B.1.1	GR	Others	NA
EPI_ISL_2106804	Rajasthan	2020-10-01	20A	B.1	G	Others	NA
EPI_ISL_2106805	Rajasthan	2020-10-01	20A	B.1.36	GH	Others	NA
EPI_ISL_2106806	Rajasthan	2020-10-01	20B	B.1.1	GR	Others	NA
EPI_ISL_2106807	Rajasthan	2020-10-01	20A	B.1.36	GH	Others	NA
EPI_ISL_2106808	Rajasthan	2020-10-01	20B	B.1.1.216	GR	Others	NA
EPI_ISL_2106809	Rajasthan	2020-10-01	20B	B.1.1.216	GR	Others	NA
EPI_ISL_2106840	Rajasthan	2020-10-07	20A	B.1.36	GH	Others	NA
EPI_ISL_2106841	Rajasthan	2020-10-07	20B	B.1.1.354	GR	Others	NA
EPI_ISL_2106842	Rajasthan	2020-10-07	20B	B.1.1.306	GR	Others	NA
EPI_ISL_2106843	Rajasthan	2020-10-07	20B	B.1.1	GR	Others	NA
EPI_ISL_2106844	Rajasthan	2020-10-07	20A	B.1	G	Others	NA
EPI_ISL_2106845	Rajasthan	2020-10-08	20B	B.1.1.326	GR	Others	NA
EPI_ISL_2106846	Rajasthan	2020-10-08	20B	B.1.1	GR	Others	NA
EPI_ISL_2106850	Rajasthan	2020-10-08	20A	B.1.36	GH	Others	NA
EPI_ISL_2106851	Rajasthan	2020-10-08	20A	B.1.36.8	GH	Others	NA
EPI_ISL_2106852	Rajasthan	2020-10-08	20B	B.1.1.216	GR	Others	NA
EPI_ISL_2106853	Rajasthan	2020-10-08	20B	B.1.1.44	GR	Others	NA
EPI_ISL_2106854	Rajasthan	2020-10-08	20A	B.1.210	G	Others	NA
EPI_ISL_2106855	Rajasthan	2020-10-08	20A	B.1.36	GH	Others	NA
EPI_ISL_2106856	Rajasthan	2020-10-08	20B	B.1.1	GR	Others	NA
EPI_ISL_2106857	Rajasthan	2020-10-08	20A	B.1.36	GH	Others	NA
EPI_ISL_2106858	Rajasthan	2020-10-08	20B	B.1.1.44	GR	Others	NA
EPI_ISL_2106859	Rajasthan	2020-10-09	20A	B.1.36.8	GH	Others	NA
EPI_ISL_2106860	Rajasthan	2020-10-09	20B	B.1.1	GR	Others	NA
EPI_ISL_2106861	Rajasthan	2020-10-09	20B	B.1.1.326	GR	Others	NA
EPI_ISL_2106862	Rajasthan	2020-10-09	20B	B.1.1.10	GR	Others	NA
EPI_ISL_2106863	Rajasthan	2020-10-09	20A	B.1.36	GH	Others	NA
EPI_ISL_2106864	Rajasthan	2020-10-10	20B	B.1.1.46	GR	Others	NA
EPI_ISL_2106865	Rajasthan	2020-10-10	20B	B.1.1.157	GR	Others	NA
EPI_ISL_2106866	Rajasthan	2020-10-10	20A	B.1	G	Others	NA
EPI_ISL_2106867	Rajasthan	2020-10-10	20B	B.1.1.216	GR	Others	NA
EPI_ISL_2106868	Rajasthan	2020-10-09	20B	B.1.1.46	GR	Others	NA
EPI_ISL_2106869	Rajasthan	2020-10-09	20B	B.1.1.101	GR	Others	NA
EPI_ISL_2106870	Rajasthan	2020-10-09	20A	B.1.36	GH	Others	NA
EPI_ISL_2106871	Rajasthan	2020-10-12	20B	B.1.1.44	GR	Others	NA
EPI_ISL_2106872	Rajasthan	2020-10-12	20B	B.1.1.216	GR	Others	NA
EPI_ISL_2106873	Rajasthan	2020-10-12	20A	B.1	G	Others	NA
EPI_ISL_2106874	Rajasthan	2020-10-21	20B	B.1.1	GR	Others	NA
EPI_ISL_2106875	Rajasthan	2020-10-21	20B	B.1.1	GR	Others	NA
EPI_ISL_2106876	Rajasthan	2020-10-21	20A	B.1.36	GH	Others	NA
EPI_ISL_2106877	Rajasthan	2020-10-21	20B	B.1.1	GR	Others	NA
EPI_ISL_2106878	Rajasthan	2020-10-21	20A	B.1.36	GH	Others	NA
EPI_ISL_2106879	Rajasthan	2020-10-21	20B	B.1.1	GR	Others	NA
EPI_ISL_2106880	Rajasthan	2020-10-21	20A	B.1.36	GH	Others	NA
EPI_ISL_2106881	Rajasthan	2020-10-21	20A	B.1.36	GH	Others	NA
EPI_ISL_2106882	Rajasthan	2020-10-22	20B	B.1.1	GR	Others	NA
EPI_ISL_2106883	Rajasthan	2020-10-22	20A	B.1.145	G	Others	NA
EPI_ISL_2106884	Rajasthan	2020-10-22	20B	B.1.1	GR	Others	NA
EPI_ISL_2106885	Rajasthan	2020-10-22	20A	B.1.36	GH	Others	NA
EPI_ISL_2106886	Rajasthan	2020-10-22	20A	B.1.36	GH	Others	NA
EPI_ISL_2106887	Rajasthan	2020-10-22	20A	B.1.36	GH	Others	NA
EPI_ISL_2106888	Rajasthan	2020-10-22	20B	B.1.1	GR	Others	NA
EPI_ISL_2106889	Rajasthan	2020-10-22	20B	B.1.1	GR	Others	NA
EPI_ISL_2157152	Telangana	2021-04-23	20I/501Y.V1	B.1.1.7	G	Alpha	VOC
EPI_ISL_2157153	Telangana	2021-04-23	20H/501Y.V2	B.1.351	GH	Beta	VOC
EPI_ISL_2157154	Telangana	2021-04-23	21A	B.1.617.2	G	Delta	VOC
EPI_ISL_2157161	Telangana	2021-04-28	20B	B.1.1	GR	Others	NA
EPI_ISL_2157166	Telangana	2021-05-03	20A	B.1.525	G	Eta	VOI
EPI_ISL_2157169	Telangana	2021-05-05	20B	B.1.1	GR	Others	NA
EPI_ISL_2231600	Andhra_Pradesh	2021-03-08	20I/501Y.V1	B.1.1	G	Others	NA
EPI_ISL_2231601	Andhra_Pradesh	2021-04-20	21A	B.1.617.2	G	Delta	VOC
EPI_ISL_2231603	Andhra_Pradesh	2021-03-05	20A	B.1.36.29	GH	Others	NA
EPI_ISL_2231604	Andhra_Pradesh	2021-03-05	20A	B.1.36.29	GH	Others	NA
EPI_ISL_2231605	Andhra_Pradesh	2021-04-15	21A	B.1.617.2	G	Delta	VOC
EPI_ISL_2231607	Andhra_Pradesh	2021-04-20	21A	B.1.617.2	G	Delta	VOC
EPI_ISL_2231608	Andhra_Pradesh	2021-04-17	21A	B.1.617.2	G	Delta	VOC
EPI_ISL_2231609	Andhra_Pradesh	2021-04-20	21A	B.1.617.2	G	Delta	VOC
EPI_ISL_2231612	Andhra_Pradesh	2021-04-16	21A	B.1.617.2	G	Delta	VOC
EPI_ISL_2231613	Andhra_Pradesh	2021-04-20	20I/501Y.V1	B.1.1.7	GR	Alpha	VOC
EPI_ISL_2231614	Andhra_Pradesh	2021-04-20	21A	B.1.617.2	G	Delta	VOC
EPI_ISL_2231615	Andhra_Pradesh	2021-04-20	21A	B.1.617.2	G	Delta	VOC
EPI_ISL_2231616	Andhra_Pradesh	2021-04-20	21A	B.1.617.2	G	Delta	VOC
EPI_ISL_2231619	Andhra_Pradesh	2021-04-20	21A	B.1.617.1	G	Kappa	VOI
EPI_ISL_2231620	Andhra_Pradesh	2021-03-05	20A	B.1.525	G	Eta	VOI
EPI_ISL_2231621	Andhra_Pradesh	2021-03-31	21A	B.1.617.1	G	Kappa	VOI
EPI_ISL_2231622	Andhra_Pradesh	2021-04-16	21A	B.1.617.1	G	Kappa	VOI
EPI_ISL_2231623	Andhra_Pradesh	2021-04-20	20I/501Y.V1	B.1.1.7	GR	Alpha	VOC
EPI_ISL_2231627	Andhra_Pradesh	2021-04-15	21A	B.1.617.2	G	Delta	VOC
EPI_ISL_2231650	Andhra_Pradesh	2021-04-19	21A	B.1.617.2	G	Delta	VOC
EPI_ISL_2231651	Andhra_Pradesh	2021-04-19	21A	B.1.617.2	G	Delta	VOC
EPI_ISL_2231653	Andhra_Pradesh	2021-04-19	21A	B.1.617.1	G	Kappa	VOI
EPI_ISL_2231656	Andhra_Pradesh	2021-04-19	21A	B.1.617.2	G	Delta	VOC
EPI_ISL_2231671	Andhra_Pradesh	2021-03-31	21A	B.1.617.1	G	Kappa	VOI
EPI_ISL_2231672	Andhra_Pradesh	2021-04-20	21A	B.1.617.2	G	Delta	VOC
EPI_ISL_2231673	Andhra_Pradesh	2021-03-31	21A	B.1.617.1	G	Kappa	VOI
EPI_ISL_2231674	Andhra_Pradesh	2021-03-31	21A	B.1.617.1	G	Kappa	VOI
EPI_ISL_2231675	Andhra_Pradesh	2021-04-20	20I/501Y.V1	B.1.1.7	GR	Alpha	VOC
EPI_ISL_2231677	Andhra_Pradesh	2021-04-20	21A	B.1.617.2	G	Delta	VOC
EPI_ISL_2231678	Andhra_Pradesh	2021-04-20	21A	B.1.617.2	G	Delta	VOC
EPI_ISL_2231679	Andhra_Pradesh	2021-04-20	21A	B.1.617.1	G	Kappa	VOI
EPI_ISL_2231680	Andhra_Pradesh	2021-04-15	21A	B.1.617.2	G	Delta	VOC
EPI_ISL_2231681	Andhra_Pradesh	2021-04-17	21A	B.1.617.2	G	Delta	VOC
EPI_ISL_2231684	Andhra_Pradesh	2021-04-20	21A	B.1.617.2	G	Delta	VOC
EPI_ISL_2231685	Andhra_Pradesh	2021-04-20	21A	B.1.617.2	G	Delta	VOC
EPI_ISL_2231687	Andhra_Pradesh	2021-04-20	21A	B.1.617.2	G	Delta	VOC
EPI_ISL_2231690	Andhra_Pradesh	2021-04-16	21A	B.1.617.2	G	Delta	VOC
EPI_ISL_2231691	Andhra_Pradesh	2021-04-17	21A	B.1.617.2	G	Delta	VOC
EPI_ISL_2231692	Andhra_Pradesh	2021-03-03	20A	B.1	GH	Others	NA
EPI_ISL_2231693	Andhra_Pradesh	2021-04-16	21A	B.1.617.1	G	Kappa	VOI
EPI_ISL_2231695	Andhra_Pradesh	2021-04-15	21A	B.1.617.2	G	Delta	VOC
EPI_ISL_2231696	Andhra_Pradesh	2021-04-20	21A	B.1.617.2	G	Delta	VOC
EPI_ISL_2272824	Puducherry	2021-04-20	21A	B.1.617.2	G	Delta	VOC
EPI_ISL_2272825	Puducherry	2021-04-20	20I/501Y.V1	B.1.1.7	GR	Alpha	VOC
EPI_ISL_2272826	Puducherry	2021-04-20	21A	B.1.617.1	G	Kappa	VOI
EPI_ISL_2272827	Puducherry	2021-04-20	21A	B.1.617.2	G	Delta	VOC
EPI_ISL_2272828	Puducherry	2021-04-22	21A	B.1.617.2	G	Delta	VOC
EPI_ISL_2272829	Puducherry	2021-04-23	21A	B.1.617.2	G	Delta	VOC
EPI_ISL_2272831	Puducherry	2021-04-23	21A	B.1.617.2	G	Delta	VOC
EPI_ISL_2272832	Puducherry	2021-04-23	21A	B.1.617.2	G	Delta	VOC
EPI_ISL_2272833	Puducherry	2021-04-23	21A	B.1.617.2	G	Delta	VOC
EPI_ISL_1838212	Maharashtra	2021-04-05	21A	B.1.617.1	G	Kappa	VOI
EPI_ISL_1838214	Maharashtra	2021-04-05	21A	B.1.617.1	G	Kappa	VOI
EPI_ISL_1838217	Maharashtra	2021-04-05	21A	B.1.617.2	G	Delta	VOC
EPI_ISL_1838604	Andhra_Pradesh	2021-04-01	21A	B.1.617.2	G	Delta	VOC
EPI_ISL_1838605	Andhra_Pradesh	2021-04-01	21A	B.1.617.1	G	Kappa	VOI
EPI_ISL_1838610	Andhra_Pradesh	2021-04-01	21A	B.1.393	G	Others	NA
EPI_ISL_1838613	Andhra_Pradesh	2021-04-01	21A	B.1.617.2	G	Delta	VOC
EPI_ISL_1838615	Andhra_Pradesh	2021-04-01	21A	B.1.617.1	G	Kappa	VOI
EPI_ISL_1838616	Andhra_Pradesh	2021-04-01	21A	B.1.617.1	G	Kappa	VOI
EPI_ISL_1838617	Andhra_Pradesh	2021-04-01	20A	B.1.36.29	GH	Others	NA
EPI_ISL_1838618	Andhra_Pradesh	2021-04-01	21A	B.1.617.1	G	Kappa	VOI
EPI_ISL_1838619	Andhra_Pradesh	2021-04-01	20I/501Y.V1	B.1.1.7	GR	Alpha	VOC
EPI_ISL_1838620	Andhra_Pradesh	2021-04-01	20I/501Y.V1	B.1.1.7	GR	Alpha	VOC
EPI_ISL_1838621	Andhra_Pradesh	2021-04-01	20I/501Y.V1	B.1.1.7	GR	Alpha	VOC
EPI_ISL_1838622	Andhra_Pradesh	2021-04-01	20I/501Y.V1	B.1.1.7	GR	Alpha	VOC
EPI_ISL_1838623	Andhra_Pradesh	2021-04-01	20A	B.1	GH	Others	NA
EPI_ISL_1838626	Andhra_Pradesh	2021-04-01	21A	B.1.617.1	G	Kappa	VOI
EPI_ISL_1838629	Andhra_Pradesh	2021-04-01	20A	B.1.36.29	GH	Others	NA
EPI_ISL_1838631	Andhra_Pradesh	2021-04-01	20B	B.1.1.354	GR	Others	NA
EPI_ISL_1838635	Andhra_Pradesh	2021-04-01	21A	B.1.617.1	G	Kappa	VOI
EPI_ISL_1838636	Andhra_Pradesh	2021-04-01	20I/501Y.V1	B.1.1.7	GR	Alpha	VOC
EPI_ISL_1838638	Andhra_Pradesh	2021-04-01	21A	B.1.617.2	G	Delta	VOC
EPI_ISL_1838640	Andhra_Pradesh	2021-04-01	20A	B.1.36.29	GH	Others	NA
EPI_ISL_1838652	Andhra_Pradesh	2021-04-07	21A	B.1.617.1	G	Kappa	VOI
EPI_ISL_1838654	Andhra_Pradesh	2021-04-07	21A	B.1.617.1	G	Kappa	VOI
EPI_ISL_1838655	Andhra_Pradesh	2021-04-07	21A	B.1.617.3	G	Others	NA
EPI_ISL_1838658	Andhra_Pradesh	2021-04-07	20I/501Y.V1	B.1.1.7	GR	Alpha	VOC
EPI_ISL_1838663	Andhra_Pradesh	2021-04-07	20I/501Y.V1	B.1.1.7	GR	Alpha	VOC
EPI_ISL_1838664	Andhra_Pradesh	2021-04-07	20I/501Y.V1	B.1.1.7	GR	Alpha	VOC
EPI_ISL_1838668	Andhra_Pradesh	2021-04-07	20I/501Y.V1	B.1.1.7	GR	Alpha	VOC
EPI_ISL_1838669	Andhra_Pradesh	2021-04-07	20I/501Y.V1	B.1.1.7	GR	Alpha	VOC
EPI_ISL_1838670	Andhra_Pradesh	2021-04-07	21A	B.1.617.1	G	Kappa	VOI
EPI_ISL_1838675	Andhra_Pradesh	2021-04-07	21A	B.1.617.1	G	Kappa	VOI
EPI_ISL_1838696	Andhra_Pradesh	2021-04-12	20I/501Y.V1	B.1.1	GR	Others	NA
EPI_ISL_1838697	Andhra_Pradesh	2021-04-12	20B	B.1.1	GR	Others	NA
EPI_ISL_1838699	Andhra_Pradesh	2021-04-12	20B	B.1.1	GR	Others	NA
EPI_ISL_1928571	Gujarat	2021-04-18	21A	B.1.617.2	G	Delta	VOC
EPI_ISL_1928572	Gujarat	2021-04-18	21A	B.1.617.2	G	Delta	VOC
EPI_ISL_1928573	Gujarat	2021-04-18	21A	B.1.617.2	G	Delta	VOC
EPI_ISL_1928575	Gujarat	2021-04-18	21A	B.1.617.2	G	Delta	VOC
EPI_ISL_1928576	Gujarat	2021-04-18	21A	B.1	G	Others	NA
EPI_ISL_1928578	Gujarat	2021-04-18	21A	B.1.617.2	G	Delta	VOC
EPI_ISL_1928584	Maharashtra	2021-04-19	21A	B.1.617.2	G	Delta	VOC
EPI_ISL_1928587	Gujarat	2021-04-19	20I/501Y.V1	B.1.1.7	GR	Alpha	VOC
EPI_ISL_1928588	Gujarat	2021-04-19	21A	B.1.617.2	G	Delta	VOC
EPI_ISL_1928592	Gujarat	2021-04-19	21A	B.1.617.2	G	Delta	VOC
EPI_ISL_1928596	Maharashtra	2021-04-20	21A	B.1.617.2	G	Delta	VOC
EPI_ISL_1928598	Maharashtra	2021-04-20	21A	B.1.617.2	G	Delta	VOC
EPI_ISL_1928599	Gujarat	2021-04-20	21A	B.1.617.2	G	Delta	VOC
EPI_ISL_1928631	Gujarat	2021-04-22	21A	B.1.617.2	G	Delta	VOC
EPI_ISL_1928633	Maharashtra	2021-04-23	21A	B.1.617.2	G	Delta	VOC
EPI_ISL_1928635	Maharashtra	2021-04-23	21A	B.1.617.2	G	Delta	VOC
EPI_ISL_1928636	Maharashtra	2021-04-23	21A	B.1.617.2	G	Delta	VOC
EPI_ISL_1928639	Gujarat	2021-04-23	21A	B.1.617.2	G	Delta	VOC
EPI_ISL_1928641	Gujarat	2021-04-23	21A	B.1.617.2	G	Delta	VOC
EPI_ISL_1928645	Maharashtra	2021-04-24	21A	B.1.617.2	G	Delta	VOC
EPI_ISL_1928650	Maharashtra	2021-04-24	21A	B.1.617.2	G	Delta	VOC
EPI_ISL_1970090	Delhi	2021-04-01	21A	B.1.617.1	G	Kappa	VOI
EPI_ISL_1970091	Delhi	2021-04-04	21A	B.1.617.1	G	Kappa	VOI
EPI_ISL_1970094	Delhi	2021-04-05	21A	B.1.617.2	G	Delta	VOC
EPI_ISL_1970095	Delhi	2021-04-05	21A	B.1.617.2	G	Delta	VOC
EPI_ISL_1970096	Himachal_Pradesh	2021-03-18	20I/501Y.V1	B.1.1.7	GRY	Alpha	VOC
EPI_ISL_1970099	Delhi	2021-04-03	21A	B.1.617.2	G	Delta	VOC
EPI_ISL_1970170	Delhi	2021-04-04	21A	B.1.617.2	G	Delta	VOC
EPI_ISL_1970171	Delhi	2021-04-03	21A	B.1.617.2	G	Delta	VOC
EPI_ISL_1970172	Himachal_Pradesh	2021-04-03	21A	B.1.617.2	G	Delta	VOC
EPI_ISL_1970173	Himachal_Pradesh	2021-04-03	21A	B.1.617.1	G	Kappa	VOI
EPI_ISL_1970174	Himachal_Pradesh	2021-04-03	21A	B.1.617.1	G	Kappa	VOI
EPI_ISL_1970180	Chandigarh	2020-12-15	20A	B.1.36	GH	Others	NA
EPI_ISL_1970181	Chandigarh	2020-12-25	20B	B.1.1.216	GR	Others	NA
EPI_ISL_1970182	Chandigarh	2020-12-14	20B	B.1.1.216	GR	Others	NA
EPI_ISL_1970183	Chandigarh	2020-12-18	20B	B.1.1.419	GR	Others	NA
EPI_ISL_1970184	Chandigarh	2020-12-22	20B	B.1.1.216	GR	Others	NA
EPI_ISL_1970185	Chandigarh	2020-12-17	20A	B.1.36	GH	Others	NA
EPI_ISL_1970186	Chandigarh	2020-12-22	20A	B.1.36	GH	Others	NA
EPI_ISL_1970187	Chandigarh	2020-12-22	20B	B.1.1.216	GR	Others	NA
EPI_ISL_1970188	Chandigarh	2020-12-19	20A	B.1.36	GH	Others	NA
EPI_ISL_1970189	Chandigarh	2020-12-22	20A	B.1.36	GH	Others	NA
EPI_ISL_1970190	Chandigarh	2020-12-19	20A	B.1.540	G	Others	NA
EPI_ISL_1970191	Chandigarh	2020-12-19	20B	B.1.1.306	GR	Others	NA
EPI_ISL_1970192	Chandigarh	2020-12-11	20A	B.1.36	GH	Others	NA
EPI_ISL_1970193	Chandigarh	2020-12-11	20A	B.1.36	GH	Others	NA
EPI_ISL_1970195	Chandigarh	2020-12-11	20B	B.1.1.101	GR	Others	NA
EPI_ISL_1970196	Chandigarh	2020-12-11	20A	B.1.36	GH	Others	NA
EPI_ISL_1970197	Chandigarh	2020-12-11	20A	B.1.36	GH	Others	NA
EPI_ISL_1970198	Chandigarh	2020-12-13	20B	B.1.1.216	GR	Others	NA
EPI_ISL_1970199	Chandigarh	2020-12-13	20A	B.1.36	GH	Others	NA
EPI_ISL_2099708	Himachal_Pradesh	2020-11-25	20A	B.1.36	GH	Others	NA
EPI_ISL_2099712	Himachal_Pradesh	2020-07-12	20A	B.1.36	GH	Others	NA
EPI_ISL_2099713	Himachal_Pradesh	2020-11-24	20B	B.1.1.216	GR	Others	NA
EPI_ISL_2099714	Himachal_Pradesh	2020-11-24	20A	B.1.36	GH	Others	NA
EPI_ISL_2099720	Himachal_Pradesh	2020-12-17	20A	B.1.36	GH	Others	NA
EPI_ISL_2099721	Himachal_Pradesh	2020-12-18	20A	B.1.36	GH	Others	NA
EPI_ISL_2099722	Himachal_Pradesh	2020-12-18	20B	B.1.1.216	GR	Others	NA
EPI_ISL_2099723	Himachal_Pradesh	2020-11-23	20A	B.1.36	GH	Others	NA
EPI_ISL_2099726	Himachal_Pradesh	2020-11-25	20A	B.1.36	GH	Others	NA
EPI_ISL_2099727	Himachal_Pradesh	2020-11-24	20B	B.1.1.132	GR	Others	NA
EPI_ISL_2099728	Himachal_Pradesh	2020-11-24	20B	B.1.1.132	GR	Others	NA
EPI_ISL_2099732	Himachal_Pradesh	2020-08-12	20A	B.1.36	GH	Others	NA
EPI_ISL_2099733	Himachal_Pradesh	2020-11-25	20B	B.1.1.216	GR	Others	NA
EPI_ISL_2099735	Himachal_Pradesh	2020-11-25	20A	B.1.36	GH	Others	NA
EPI_ISL_2099736	Himachal_Pradesh	2020-08-12	20B	B.1.1.274	GR	Others	NA
EPI_ISL_2099737	Himachal_Pradesh	2020-12-12	20A	B.1.36	GH	Others	NA
EPI_ISL_2099738	Himachal_Pradesh	2020-12-12	20A	B.1.36	GH	Others	NA
EPI_ISL_2099739	Himachal_Pradesh	2020-12-12	20A	B.1.36	GH	Others	NA
EPI_ISL_2099740	Himachal_Pradesh	2020-12-12	20B	B.1.1	GR	Others	NA
EPI_ISL_2099741	Himachal_Pradesh	2020-12-17	20B	B.1.1.216	GR	Others	NA
EPI_ISL_2099742	Himachal_Pradesh	2020-12-17	20A	B.1.36	GH	Others	NA
EPI_ISL_2099743	Himachal_Pradesh	2020-12-18	20B	B.1.1.216	GR	Others	NA
EPI_ISL_2099744	Himachal_Pradesh	2020-12-19	20B	B.1.1.216	GR	Others	NA
EPI_ISL_2099745	Himachal_Pradesh	2020-12-16	20A	B.1.36	GH	Others	NA
EPI_ISL_2099746	Himachal_Pradesh	2020-12-19	20A	B.1.36	GH	Others	NA
EPI_ISL_2099747	Himachal_Pradesh	2020-12-16	20A	B.1.36	GH	Others	NA
EPI_ISL_2099748	Himachal_Pradesh	2020-12-15	20A	B.1.36	GH	Others	NA
EPI_ISL_2099749	Himachal_Pradesh	2020-12-16	20B	B.1.1.216	GR	Others	NA
EPI_ISL_2099750	Himachal_Pradesh	2020-10-12	20A	B.1.36	GH	Others	NA
EPI_ISL_2099751	Himachal_Pradesh	2020-10-12	20A	B.1.36	GH	Others	NA
EPI_ISL_2099752	Himachal_Pradesh	2020-12-16	20B	B.1.1.216	GR	Others	NA
EPI_ISL_2099753	Himachal_Pradesh	2020-11-12	20B	B.1.1.216	GR	Others	NA
EPI_ISL_2099754	Himachal_Pradesh	2020-11-12	20A	B.1.36	GH	Others	NA
EPI_ISL_2099755	Himachal_Pradesh	2020-11-12	20A	B.1.36.38	GH	Others	NA
EPI_ISL_2099759	Himachal_Pradesh	2020-11-12	20B	B.1.1.216	GR	Others	NA
EPI_ISL_2099760	Himachal_Pradesh	2020-12-12	20B	B.1.1.216	GR	Others	NA
EPI_ISL_2099761	Himachal_Pradesh	2020-12-16	20B	B.1.1.216	GR	Others	NA
EPI_ISL_2099762	Himachal_Pradesh	2020-12-12	20A	B.1.36	GH	Others	NA
EPI_ISL_2099763	Himachal_Pradesh	2020-11-12	20A	B.1.36	GH	Others	NA
EPI_ISL_2099764	Himachal_Pradesh	2020-11-30	20B	B.1.1.216	GR	Others	NA
EPI_ISL_2099765	Himachal_Pradesh	2020-11-30	20B	B.1.1	GR	Others	NA
EPI_ISL_2099767	Himachal_Pradesh	2020-11-27	20A	B.1	G	Others	NA
EPI_ISL_2099769	Delhi	2021-02	20I/501Y.V1	B.1.1.7	GR	Alpha	VOC
EPI_ISL_2099770	Maharashtra	2021-02	20A	B.1.36.29	GH	Others	NA
EPI_ISL_2100700	Delhi	2021-04-29	21A	B.1.617.1	G	Kappa	VOI
EPI_ISL_2105576	Delhi	2021-04-23	21A	B.1.617.2	G	Delta	VOC
EPI_ISL_2106810	Rajasthan	2020-10-01	20A	B.1.36.8	GH	Others	NA
EPI_ISL_2106811	Rajasthan	2020-10-01	20A	B.1.36	GH	Others	NA
EPI_ISL_2106812	Rajasthan	2020-10-01	20A	B.1	G	Others	NA
EPI_ISL_2106813	Rajasthan	2020-10-02	20A	B.1	G	Others	NA
EPI_ISL_2106814	Rajasthan	2020-10-02	20B	B.1.1	GR	Others	NA
EPI_ISL_2106815	Rajasthan	2020-10-02	20B	B.1.1	GR	Others	NA
EPI_ISL_2106816	Rajasthan	2020-10-03	20B	B.1.1	GR	Others	NA
EPI_ISL_2106817	Rajasthan	2020-10-03	20B	B.1.1	GR	Others	NA
EPI_ISL_2106818	Rajasthan	2020-10-04	20B	B.1.1	GR	Others	NA
EPI_ISL_2106819	Rajasthan	2020-10-04	20B	B.1.1.216	GR	Others	NA
EPI_ISL_2106820	Rajasthan	2020-10-04	20A	B.1	G	Others	NA
EPI_ISL_2106821	Rajasthan	2020-10-04	19B	A.21	S	Others	NA
EPI_ISL_2106822	Rajasthan	2020-10-05	20B	B.1.1	GR	Others	NA
EPI_ISL_2106823	Rajasthan	2020-10-05	20A	B.1	G	Others	NA
EPI_ISL_2106824	Rajasthan	2020-10-05	20A	B.1	G	Others	NA
EPI_ISL_2106825	Rajasthan	2020-10-05	20B	B.1.1.326	GR	Others	NA
EPI_ISL_2106826	Rajasthan	2020-10-05	20B	B.1.1.306	GR	Others	NA
EPI_ISL_2106827	Rajasthan	2020-10-05	20A	B.1.36.8	GH	Others	NA
EPI_ISL_2106828	Rajasthan	2020-10-05	20B	B.1.1.306	GR	Others	NA
EPI_ISL_2106829	Rajasthan	2020-10-06	20A	B.1	G	Others	NA
EPI_ISL_2106830	Rajasthan	2020-10-06	20B	B.1.1	GR	Others	NA
EPI_ISL_2106831	Rajasthan	2020-10-06	20A	B.1.36	GH	Others	NA
EPI_ISL_2106832	Rajasthan	2020-10-06	20A	B.1.36	GH	Others	NA
EPI_ISL_2106833	Rajasthan	2020-10-07	20A	B.1	G	Others	NA
EPI_ISL_2106834	Rajasthan	2020-10-07	20B	B.1.1.44	GR	Others	NA
EPI_ISL_2106835	Rajasthan	2020-10-07	20B	B.1.1.44	GR	Others	NA
EPI_ISL_2106836	Rajasthan	2020-10-07	20B	B.1.1.44	GR	Others	NA
EPI_ISL_2106837	Rajasthan	2020-10-07	20B	B.1.1.44	GR	Others	NA
EPI_ISL_2106838	Rajasthan	2020-10-07	20A	B.1.569	G	Others	NA
EPI_ISL_2106839	Rajasthan	2020-10-07	20A	B.1.36	GH	Others	NA
EPI_ISL_2106847	Rajasthan	2020-10-08	20B	B.1.1	GR	Others	NA
EPI_ISL_2106848	Rajasthan	2020-10-08	20B	B.1.1	GR	Others	NA
EPI_ISL_2106849	Rajasthan	2020-10-08	20A	B.1	G	Others	NA
EPI_ISL_2151073	Sikkim	2021-01-04	20A	B.1.36	GH	Others	NA
EPI_ISL_2151074	Sikkim	2021-01-04	20A	B.1.36	GH	Others	NA
EPI_ISL_2151075	Sikkim	2021-01-07	20B	B.1.1.216	GR	Others	NA
EPI_ISL_2151077	Sikkim	2021-01-14	20A	B.1.36.18	GH	Others	NA
EPI_ISL_2151079	Sikkim	2021-01-16	20B	B.1.1.216	GR	Others	NA
EPI_ISL_2151081	Sikkim	2021-01-18	20A	B.1.36	GH	Others	NA
EPI_ISL_2151082	Sikkim	2021-02-19	20I/501Y.V1	B.1.1.7	GRY	Alpha	VOC
EPI_ISL_2151083	Sikkim	2021-02-21	20I/501Y.V1	B.1.1.7	GRY	Alpha	VOC
EPI_ISL_2151085	Sikkim	2021-03-06	20I/501Y.V1	B.1.1.7	GRY	Alpha	VOC
EPI_ISL_2151086	Sikkim	2021-03-09	20I/501Y.V1	B.1.1.7	GRY	Alpha	VOC
EPI_ISL_2151087	Sikkim	2021-03-12	20I/501Y.V1	B.1.1.7	GRY	Alpha	VOC
EPI_ISL_2151089	Sikkim	2021-03-26	20A	B.1.36	GH	Others	NA
EPI_ISL_2151091	Sikkim	2021-03-16	21A	B.1.617.1	G	Kappa	VOI
EPI_ISL_2151092	Sikkim	2021-03-20	20A	B.1.36.22	GH	Others	NA
EPI_ISL_2151093	Sikkim	2021-03-22	20A	B.1.36.22	GH	Others	NA
EPI_ISL_2151094	Sikkim	2021-03-26	20I/501Y.V1	B.1.1.7	GRY	Alpha	VOC
EPI_ISL_2151095	Sikkim	2021-03-26	20I/501Y.V1	B.1.1.7	GRY	Alpha	VOC
EPI_ISL_2151096	Sikkim	2021-03-26	21A	B.1.617.2	G	Delta	VOC
EPI_ISL_2151098	Sikkim	2021-03-29	21A	B.1.617.2	G	Delta	VOC
EPI_ISL_2151099	Sikkim	2021-04-02	21A	B.1.617.2	G	Delta	VOC
EPI_ISL_2157104	Telangana	2021-04-21	21A	B.1.617.2	G	Delta	VOC
EPI_ISL_2157106	Telangana	2021-04-21	21A	B.1.617.2	G	Delta	VOC
EPI_ISL_2157111	Telangana	2021-04-22	21A	B.1.617.2	G	Delta	VOC
EPI_ISL_2157112	Telangana	2021-04-22	21A	B.1.617.2	G	Delta	VOC
EPI_ISL_2157121	Telangana	2021-04-23	21A	B.1.617.2	G	Delta	VOC
EPI_ISL_2157123	Telangana	2021-04-23	21A	B.1.617.2	G	Delta	VOC
EPI_ISL_2157130	Telangana	2021-04-23	21A	B.1.617.2	G	Delta	VOC
EPI_ISL_2189640	Gujarat	2021-04-02	20I/501Y.V1	B.1.1.7	GRY	Alpha	VOC
EPI_ISL_2189641	Gujarat	2021-04-02	21A	B.1.617.2	G	Delta	VOC
EPI_ISL_2189642	Gujarat	2021-04-06	21A	B.1.617.2	G	Delta	VOC
EPI_ISL_2189643	Gujarat	2021-04-10	21A	B.1.617.2	G	Delta	VOC
EPI_ISL_2189644	Gujarat	2021-04-10	21A	B.1.245	G	Others	NA
EPI_ISL_2189645	Gujarat	2021-04-10	21A	B.1.617.1	G	Kappa	VOI
EPI_ISL_2189647	Gujarat	2021-04-02	21A	B.1.617.1	G	Kappa	VOI
EPI_ISL_2189648	Gujarat	2021-04-10	21A	B.1.617.1	G	Kappa	VOI
EPI_ISL_2189649	Gujarat	2021-04-10	21A	B.1.617.2	G	Delta	VOC
EPI_ISL_2189650	Gujarat	2021-04-10	21A	B.1.617.2	G	Delta	VOC
EPI_ISL_2189651	Gujarat	2021-04-01	20I/501Y.V1	B.1.1.7	GRY	Alpha	VOC
EPI_ISL_2189652	Gujarat	2021-04-02	21A	B.1.617.2	G	Delta	VOC
EPI_ISL_2189653	Gujarat	2021-04-02	21A	B.1.617.1	G	Kappa	VOI
EPI_ISL_2189654	Gujarat	2021-04-02	21A	B.1.617.2	G	Delta	VOC
EPI_ISL_2189656	Gujarat	2021-04-10	21A	B.1.617.2	G	Delta	VOC
EPI_ISL_2189657	Gujarat	2021-04-10	21A	B.1.617.2	G	Delta	VOC
EPI_ISL_2189658	Gujarat	2021-04-10	21A	B.1.617.2	G	Delta	VOC
EPI_ISL_2189660	Gujarat	2021-04-02	21A	B.1.617.1	G	Kappa	VOI
EPI_ISL_2189661	Gujarat	2021-04-02	21A	B.1.617.1	G	Kappa	VOI
EPI_ISL_2189663	Gujarat	2021-04-10	21A	B.1.617.2	G	Delta	VOC
EPI_ISL_2189664	Gujarat	2021-04-10	21A	B.1.617.1	G	Kappa	VOI
EPI_ISL_2189665	Gujarat	2021-04-10	21A	B.1.617.1	G	Kappa	VOI
EPI_ISL_2189666	Gujarat	2021-04-02	21A	B.1.617.1	G	Kappa	VOI
EPI_ISL_2189667	Gujarat	2021-04-02	21A	B.1.617.1	G	Kappa	VOI
EPI_ISL_2189668	Gujarat	2021-04-02	21A	B.1.617.1	G	Kappa	VOI
EPI_ISL_2189669	Gujarat	2021-04-06	21A	B.1.617.2	G	Delta	VOC
EPI_ISL_2189670	Gujarat	2021-04-10	21A	B.1.617.2	G	Delta	VOC
EPI_ISL_2189671	Gujarat	2021-04-10	21A	B.1.617.1	G	Kappa	VOI
EPI_ISL_2189672	Gujarat	2021-04-10	21A	B.1.617.1	G	Kappa	VOI
EPI_ISL_2189673	Gujarat	2021-04-02	20I/501Y.V1	B.1.1.7	GRY	Alpha	VOC
EPI_ISL_2189674	Gujarat	2021-04-02	21A	B.1.617.1	G	Kappa	VOI
EPI_ISL_2189675	Gujarat	2021-04-02	20A	B.1.36	GH	Others	NA
EPI_ISL_2189676	Gujarat	2021-04-06	21A	B.1.617.2	G	Delta	VOC
EPI_ISL_2189677	Gujarat	2021-04-10	21A	B.1.617.1	G	Kappa	VOI
EPI_ISL_2189679	Gujarat	2021-04-10	21A	B.1.617.2	G	Delta	VOC
EPI_ISL_2189690	Gujarat	2021-04-10	21A	B.1.617.1	G	Kappa	VOI
EPI_ISL_2231590	Andhra_Pradesh	2021-04-17	21A	B.1.617.2	G	Delta	VOC
EPI_ISL_2231594	Andhra_Pradesh	2021-03-08	20I/501Y.V1	B.1.1	G	Others	NA
EPI_ISL_2231595	Andhra_Pradesh	2021-03-31	21A	B.1.617.1	G	Kappa	VOI
EPI_ISL_2231597	Andhra_Pradesh	2021-04-16	21A	B.1.617.2	G	Delta	VOC
EPI_ISL_2231598	Andhra_Pradesh	2021-04-15	21A	B.1.617.2	G	Delta	VOC
EPI_ISL_2231628	Andhra_Pradesh	2021-04-16	21A	B.1.617.2	G	Delta	VOC
EPI_ISL_2231631	Andhra_Pradesh	2021-03-03	20A	B.1.36.29	GH	Others	NA
EPI_ISL_2231632	Andhra_Pradesh	2021-04-17	21A	B.1.617.2	G	Delta	VOC
EPI_ISL_2231633	Andhra_Pradesh	2021-04-15	21A	B.1.617.2	G	Delta	VOC
EPI_ISL_2231634	Andhra_Pradesh	2021-04-17	21A	B.1.617.2	G	Delta	VOC
EPI_ISL_2231635	Andhra_Pradesh	2021-04-17	21A	B.1.617.2	G	Delta	VOC
EPI_ISL_2231636	Andhra_Pradesh	2021-04-15	21A	B.1.617.2	G	Delta	VOC
EPI_ISL_2231637	Andhra_Pradesh	2021-03-08	20A	B.1.36.29	GH	Others	NA
EPI_ISL_2231638	Andhra_Pradesh	2021-04-15	20I/501Y.V1	B.1.1.7	GR	Alpha	VOC
EPI_ISL_2231639	Andhra_Pradesh	2021-04-17	21A	B.1.617.2	G	Delta	VOC
EPI_ISL_2231640	Andhra_Pradesh	2021-04-15	21A	B.1.617.2	G	Delta	VOC
EPI_ISL_2231641	Andhra_Pradesh	2021-04-20	21A	B.1.617.2	G	Delta	VOC
EPI_ISL_2231642	Andhra_Pradesh	2021-04-17	21A	B.1.617.2	G	Delta	VOC
EPI_ISL_2231644	Andhra_Pradesh	2021-03-08	20A	B.1	G	Others	NA
EPI_ISL_2231647	Andhra_Pradesh	2021-04-19	21A	B.1.617.1	G	Kappa	VOI
EPI_ISL_2231649	Andhra_Pradesh	2021-04-19	21A	B.1.617.1	G	Kappa	VOI
EPI_ISL_2231654	Andhra_Pradesh	2021-04-19	21A	B.1.617.2	G	Delta	VOC
EPI_ISL_2231658	Andhra_Pradesh	2021-04-21	21A	B.1.617.1	G	Kappa	VOI
EPI_ISL_2231661	Andhra_Pradesh	2021-04-21	21A	B.1.617.3	G	Others	NA
EPI_ISL_2231665	Andhra_Pradesh	2021-04-21	21A	B.1.617.2	G	Delta	VOC
EPI_ISL_2231667	Andhra_Pradesh	2021-04-21	21A	B.1.617.2	G	Delta	VOC
EPI_ISL_2231669	Andhra_Pradesh	2021-04-15	21A	B.1.617.2	G	Delta	VOC
EPI_ISL_1818600	Karnataka	2021-03-24	20I/501Y.V1	B.1.1.7	GR	Alpha	VOC
EPI_ISL_1818617	Karnataka	2021-03-30	21A	B.1	G	Others	NA
EPI_ISL_1818622	Karnataka	2021-03-23	20B	B.1.560	G	Others	NA
EPI_ISL_1818630	Karnataka	2021-03-24	20A	B.1.36.29	GH	Others	NA
EPI_ISL_1818631	Karnataka	2021-03-25	20I/501Y.V1	B.1.1.7	GR	Alpha	VOC
EPI_ISL_1818634	Karnataka	2021-03-25	21A	B.1.617.1	G	Kappa	VOI
EPI_ISL_1818637	Karnataka	2021-03-25	20I/501Y.V1	B.1.1.7	GR	Alpha	VOC
EPI_ISL_1838200	Maharashtra	2021-04-05	21A	B.1.617.1	G	Kappa	VOI
EPI_ISL_1838205	Maharashtra	2021-04-05	21A	B.1.617.1	G	Kappa	VOI
EPI_ISL_1838207	Maharashtra	2021-04-05	21A	B.1.617.1	G	Kappa	VOI
EPI_ISL_1838209	Maharashtra	2021-04-05	21A	B.1.617.1	G	Kappa	VOI
EPI_ISL_1838219	Maharashtra	2021-04-05	21A	B.1.617.1	G	Kappa	VOI
EPI_ISL_1838220	Maharashtra	2021-04-05	21A	B.1.617.1	G	Kappa	VOI
EPI_ISL_1838222	Maharashtra	2021-04-05	20I/501Y.V1	B.1.1.7	GR	Alpha	VOC
EPI_ISL_1838225	Maharashtra	2021-04-05	21A	B.1.617.2	G	Delta	VOC
EPI_ISL_1838227	Maharashtra	2021-04-05	21A	B.1.617.1	G	Kappa	VOI
EPI_ISL_1838229	Maharashtra	2021-04-05	21A	B.1.617.2	G	Delta	VOC
EPI_ISL_1838230	Maharashtra	2021-04-05	21A	B.1.617.1	G	Kappa	VOI
EPI_ISL_1838234	Maharashtra	2021-04-05	21A	B.1.617.1	G	Kappa	VOI
EPI_ISL_1838235	Maharashtra	2021-04-05	21A	B.1.617.1	G	Kappa	VOI
EPI_ISL_1838237	Maharashtra	2021-04-05	21A	B.1.617.1	G	Kappa	VOI
EPI_ISL_1838241	Maharashtra	2021-04-05	21A	B.1.617.1	G	Kappa	VOI
EPI_ISL_1838253	Maharashtra	2021-03-27	20I/501Y.V1	B.1.1.7	GR	Alpha	VOC
EPI_ISL_1838256	Maharashtra	2021-03-27	21A	B.1.617.1	G	Kappa	VOI
EPI_ISL_1838259	Maharashtra	2021-03-31	21A	B.1	G	Others	NA
EPI_ISL_1838260	Maharashtra	2021-03-31	21A	B.1.617.2	G	Delta	VOC
EPI_ISL_1838262	Maharashtra	2021-03-31	21A	B.1.617.2	G	Delta	VOC
EPI_ISL_1838264	Maharashtra	2021-03-29	20A	B.1.465	GH	Others	NA
EPI_ISL_1838265	Maharashtra	2021-03-29	21A	B.1.617.2	G	Delta	VOC
EPI_ISL_1838267	Maharashtra	2021-03-26	21A	B.1.617.1	G	Kappa	VOI
EPI_ISL_1838271	Maharashtra	2021-03-30	21A	B.1.617.1	G	Kappa	VOI
EPI_ISL_1838272	Maharashtra	2021-04-01	20A	B.1	G	Others	NA
EPI_ISL_1838274	Maharashtra	2021-04-01	20I/501Y.V1	B.1.1.7	GR	Alpha	VOC
EPI_ISL_1838275	Maharashtra	2021-04-01	20A	B.1	G	Others	NA
EPI_ISL_1838277	Maharashtra	2021-04-01	20I/501Y.V1	B.1.1.7	GR	Alpha	VOC
EPI_ISL_1838280	Maharashtra	2021-04-01	21A	B.1.617.1	G	Kappa	VOI
EPI_ISL_1838282	Maharashtra	2021-04-01	21A	B.1.617.2	G	Delta	VOC
EPI_ISL_1838285	Maharashtra	2021-03-31	21A	B.1.617.2	G	Delta	VOC
EPI_ISL_1838287	Maharashtra	2021-03-31	21A	B.1.393	G	Others	NA
EPI_ISL_1838292	Maharashtra	2021-03-31	21A	B.1.617.2	G	Delta	VOC
EPI_ISL_1838293	Maharashtra	2021-03-31	21A	B.1	G	Others	NA
EPI_ISL_1838295	Maharashtra	2021-03-31	21A	B.1.617.1	G	Kappa	VOI
EPI_ISL_1838694	Andhra_Pradesh	2021-04-12	21A	B.1.617.2	G	Delta	VOC
EPI_ISL_1928602	Gujarat	2021-04-20	21A	B.1.617.2	G	Delta	VOC
EPI_ISL_1928605	Gujarat	2021-04-20	21A	B.1.617.2	G	Delta	VOC
EPI_ISL_1928608	Maharashtra	2021-04-21	21A	B.1.617.2	G	Delta	VOC
EPI_ISL_1928610	Maharashtra	2021-04-21	21A	B.1.422	G	Others	NA
EPI_ISL_1928620	Maharashtra	2021-04-22	21A	B.1.617.2	G	Delta	VOC
EPI_ISL_1928624	Maharashtra	2021-04-22	21A	B.1.617.2	G	Delta	VOC
EPI_ISL_1928629	Gujarat	2021-04-22	21A	B.1	G	Others	NA
EPI_ISL_1970203	Chandigarh	2020-12-08	20A	B.1.36	GH	Others	NA
EPI_ISL_1970500	Gujarat	2021-04-21	21A	B.1.617.2	G	Delta	VOC
EPI_ISL_1970501	Gujarat	2021-04-18	21A	B.1.617.2	G	Delta	VOC
EPI_ISL_1970502	Gujarat	2021-04-18	21A	B.1.617.2	G	Delta	VOC
EPI_ISL_1970503	Gujarat	2021-04-18	21A	B.1.617.2	G	Delta	VOC
EPI_ISL_1970504	Gujarat	2021-04-19	21A	B.1.617.2	G	Delta	VOC
EPI_ISL_1970505	Gujarat	2021-04-18	21A	B.1.617.2	G	Delta	VOC
EPI_ISL_1970506	Gujarat	2021-04-19	21A	B.1.617.2	G	Delta	VOC
EPI_ISL_1970507	Gujarat	2021-04-18	21A	B.1	G	Others	NA
EPI_ISL_1970508	Gujarat	2021-04-24	21A	B.1.617.2	G	Delta	VOC
EPI_ISL_1970511	Gujarat	2021-04-25	21A	B.1.617.2	G	Delta	VOC
EPI_ISL_1970512	Gujarat	2021-04-25	21A	B.1.617.2	G	Delta	VOC
EPI_ISL_1970513	Maharashtra	2021-04-20	21A	B.1.617.2	G	Delta	VOC
EPI_ISL_1970514	Maharashtra	2021-04-26	21A	B.1.617.2	G	Delta	VOC
EPI_ISL_1970515	Maharashtra	2021-04-26	21A	B.1.617.2	G	Delta	VOC
EPI_ISL_1970516	Maharashtra	2021-04-26	21A	B.1.617.1	G	Kappa	VOI
EPI_ISL_1970517	Maharashtra	2021-04-26	21A	B.1.617.2	G	Delta	VOC
EPI_ISL_1970518	Maharashtra	2021-04-26	21A	B.1.617.2	G	Delta	VOC
EPI_ISL_1970519	Maharashtra	2021-04-26	21A	B.1.617.2	G	Delta	VOC
EPI_ISL_1970520	Maharashtra	2021-04-26	21A	B.1.617.2	G	Delta	VOC
EPI_ISL_1970521	Maharashtra	2021-04-26	21A	B.1.617.1	G	Kappa	VOI
EPI_ISL_1970522	Maharashtra	2021-04-26	21A	B.1.617.2	G	Delta	VOC
EPI_ISL_1970523	Maharashtra	2021-04-26	21A	B.1.617.2	G	Delta	VOC
EPI_ISL_1970524	Maharashtra	2021-04-26	21A	B.1.617.2	G	Delta	VOC
EPI_ISL_1970525	Maharashtra	2021-04-26	21A	B.1.617.2	G	Delta	VOC
EPI_ISL_1970526	Maharashtra	2021-04-26	21A	B.1.617.2	G	Delta	VOC
EPI_ISL_1970527	Maharashtra	2021-04-26	21A	B.1.617.2	G	Delta	VOC
EPI_ISL_1970528	Maharashtra	2021-04-26	21A	B.1.617.1	G	Kappa	VOI
EPI_ISL_1970529	Maharashtra	2021-04-26	21A	B.1.617.2	G	Delta	VOC
EPI_ISL_2015619	Karnataka	2021-04	21A	B.1.617.2	G	Delta	VOC
EPI_ISL_2015620	Karnataka	2021-04	21A	B.1.617.2	G	Delta	VOC
EPI_ISL_2015621	Karnataka	2021-04	21A	B.1.617.2	G	Delta	VOC
EPI_ISL_2015622	Karnataka	2021-04	21A	B.1.617.2	G	Delta	VOC
EPI_ISL_2015623	Karnataka	2021-04	21A	B.1.617.2	G	Delta	VOC
EPI_ISL_2015624	Karnataka	2021-04	21A	B.1.617.2	G	Delta	VOC
EPI_ISL_2015625	Karnataka	2021-04	21A	B.1.617.1	G	Kappa	VOI
EPI_ISL_2015626	Karnataka	2021-04	21A	B.1.617.2	G	Delta	VOC
EPI_ISL_2015627	Karnataka	2021-04	21A	B.1.617.2	G	Delta	VOC
EPI_ISL_2015628	Karnataka	2021-04	21A	B.1.617.2	G	Delta	VOC
EPI_ISL_2015629	Karnataka	2021-04	21A	B.1	G	Others	NA
EPI_ISL_2015630	Karnataka	2021-04	21A	B.1.617.2	G	Delta	VOC
EPI_ISL_2015631	Karnataka	2021-04	21A	B.1.617.2	G	Delta	VOC
EPI_ISL_2015632	Karnataka	2021-04	21A	B.1.617.2	G	Delta	VOC
EPI_ISL_2015633	Karnataka	2021-04	21A	B.1.617.2	G	Delta	VOC
EPI_ISL_2015634	Karnataka	2021-04	21A	B.1.617.1	G	Kappa	VOI
EPI_ISL_2015635	Karnataka	2021-04	21A	B.1.617.2	G	Delta	VOC
EPI_ISL_2015636	Karnataka	2021-05	21A	B.1.617.2	G	Delta	VOC
EPI_ISL_2015637	Karnataka	2021-05	21A	B.1.617.2	G	Delta	VOC
EPI_ISL_2015638	Karnataka	2021-04	21A	B.1.617.2	G	Delta	VOC
EPI_ISL_2015639	Karnataka	2021-04	21A	B.1.617.2	G	Delta	VOC
EPI_ISL_2015640	Karnataka	2021-04	21A	B.1.617.2	G	Delta	VOC
EPI_ISL_2015641	Karnataka	2021-05	21A	B.1.617.2	G	Delta	VOC
EPI_ISL_2099702	Himachal_Pradesh	2020-11-25	20A	B.1.36	GH	Others	NA
EPI_ISL_2099703	Himachal_Pradesh	2020-11-25	20A	B.1.36.38	GH	Others	NA
EPI_ISL_2106890	Rajasthan	2020-10-22	20B	B.1.1	GR	Others	NA
EPI_ISL_2106891	Rajasthan	2020-10-22	20B	B.1.1	GR	Others	NA
EPI_ISL_2106892	Rajasthan	2020-10-22	20B	B.1.1	GR	Others	NA
EPI_ISL_2106893	Rajasthan	2020-10-22	20B	B.1.1	GR	Others	NA
EPI_ISL_2106894	Rajasthan	2020-10-22	20B	B.1.1	GR	Others	NA
EPI_ISL_2106895	Rajasthan	2020-10-22	20A	B.1	G	Others	NA
EPI_ISL_2106896	Rajasthan	2020-10-22	20A	B.1.36	GH	Others	NA
EPI_ISL_2106897	Rajasthan	2020-10-22	20B	B.1.1	GR	Others	NA
EPI_ISL_2106898	Rajasthan	2020-10-22	20B	B.1.1	GR	Others	NA
EPI_ISL_2106899	Rajasthan	2020-10-22	20B	B.1.1	GR	Others	NA
EPI_ISL_2106900	Rajasthan	2020-10-22	20B	B.1.1.294	GR	Others	NA
EPI_ISL_2106901	Rajasthan	2020-10-22	20A	B.1.36	GH	Others	NA
EPI_ISL_2106902	Rajasthan	2020-10-23	20A	B.1.36.8	GH	Others	NA
EPI_ISL_2106903	Rajasthan	2020-10-23	20B	B.1.1	GR	Others	NA
EPI_ISL_2106904	Rajasthan	2020-10-23	20B	B.1.1	GR	Others	NA
EPI_ISL_2106905	Rajasthan	2020-10-23	20B	B.1.1	GR	Others	NA
EPI_ISL_2106906	Rajasthan	2020-10-23	20A	B.1.36.8	GH	Others	NA
EPI_ISL_2106907	Rajasthan	2020-10-23	20A	B.1.36	GH	Others	NA
EPI_ISL_2106908	Rajasthan	2020-10-23	20B	B.1.1.44	GR	Others	NA
EPI_ISL_2106909	Rajasthan	2020-10-23	20B	B.1.1.216	GR	Others	NA
EPI_ISL_2106910	Rajasthan	2020-10-23	20B	B.1.1.216	GR	Others	NA
EPI_ISL_2106911	Rajasthan	2020-10-23	20A	B.1.36	GH	Others	NA
EPI_ISL_2106912	Rajasthan	2020-10-23	20A	B.1.36.8	GH	Others	NA
EPI_ISL_2106913	Rajasthan	2020-10-23	20B	B.1.1	GR	Others	NA
EPI_ISL_2106914	Rajasthan	2020-10-24	20A	B.1.36	GH	Others	NA
EPI_ISL_2106915	Rajasthan	2020-10-24	20A	B.1	G	Others	NA
EPI_ISL_2106916	Rajasthan	2020-10-24	20A	B.1.36	GH	Others	NA
EPI_ISL_2106917	Rajasthan	2020-10-24	20A	B.1.36.8	GH	Others	NA
EPI_ISL_2106918	Rajasthan	2020-10-26	20A	B.1.36.22	GH	Others	NA
EPI_ISL_2106919	Rajasthan	2020-10-26	20A	B.1	G	Others	NA
EPI_ISL_2106920	Rajasthan	2020-10-27	20A	B.1.36	GH	Others	NA
EPI_ISL_2106921	Rajasthan	2020-10-27	20A	B.1.36	GH	Others	NA
EPI_ISL_2106922	Rajasthan	2020-10-28	20B	B.1.1	GR	Others	NA
EPI_ISL_2106923	Rajasthan	2020-10-28	20B	B.1.1	GR	Others	NA
EPI_ISL_2106924	Rajasthan	2020-10-28	20A	B.1.36	GH	Others	NA
EPI_ISL_2106925	Rajasthan	2020-10-28	20A	B.1.564	G	Others	NA
EPI_ISL_2106926	Rajasthan	2020-10-28	20B	B.1.1	GR	Others	NA
EPI_ISL_2106927	Rajasthan	2020-10-29	20A	B.1.210	G	Others	NA
EPI_ISL_2106928	Rajasthan	2020-10-29	20B	B.1.1.216	GR	Others	NA
EPI_ISL_2106929	Rajasthan	2020-10-29	20B	B.1.1.216	GR	Others	NA
EPI_ISL_2132700	West_Bengal	2021-02-18	20A	B.1.538	G	Others	NA
EPI_ISL_2132701	West_Bengal	2021-02-20	20A	B.1.538	G	Others	NA
EPI_ISL_2132702	West_Bengal	2020-10-26	20A	B.1	G	Others	NA
EPI_ISL_2132703	West_Bengal	2020-10-26	20A	B.1	G	Others	NA
EPI_ISL_2132704	West_Bengal	2020-10-26	20A	B.1	G	Others	NA
EPI_ISL_2132707	West_Bengal	2021-03-09	20A	B.1.538	G	Others	NA
EPI_ISL_2132709	West_Bengal	2021-02-10	20A	B.1.36	GH	Others	NA
EPI_ISL_2132710	West_Bengal	2021-01-30	20B	B.1.1	GR	Others	NA
EPI_ISL_2132712	West_Bengal	2021-01-29	20B	B.1.1	GR	Others	NA
EPI_ISL_2132713	West_Bengal	2021-03-07	20B	B.1.1.164	GR	Others	NA
EPI_ISL_2132715	West_Bengal	2021-03-23	21A	B.1.617.3	G	Others	NA
EPI_ISL_2132721	West_Bengal	2021-03-14	21A	B.1.617.1	G	Kappa	VOI
EPI_ISL_2158591	Delhi	2020-10-09	20A	B.1.36	GH	Others	NA
EPI_ISL_2158592	Delhi	2020-10-09	20A	B.1.36	GH	Others	NA
EPI_ISL_2158593	Delhi	2020-10-08	20A	B.1.36	GH	Others	NA
EPI_ISL_2158595	Delhi	2020-12-13	20A	B.1.36	GH	Others	NA
EPI_ISL_2189600	Gujarat	2021-03-24	20A	B.1.36.8	GH	Others	NA
EPI_ISL_2189601	Gujarat	2021-03-26	21A	B.1.617.1	G	Kappa	VOI
EPI_ISL_2189602	Gujarat	2021-03-26	21A	B.1.617.1	G	Kappa	VOI
EPI_ISL_2189603	Gujarat	2021-03-26	21A	B.1.617.1	G	Kappa	VOI
EPI_ISL_2189604	Gujarat	2021-03-31	20I/501Y.V1	B.1.1.7	GRY	Alpha	VOC
EPI_ISL_2189606	Gujarat	2021-03-24	21A	B.1.617.1	G	Kappa	VOI
EPI_ISL_2189607	Gujarat	2021-03-26	21A	B.1.617.1	G	Kappa	VOI
EPI_ISL_2189610	Gujarat	2021-04-01	20B	B.1.1.216	GR	Others	NA
EPI_ISL_2189611	Gujarat	2021-03-24	20A	B.1.36	GH	Others	NA
EPI_ISL_2189612	Gujarat	2021-03-24	20I/501Y.V1	B.1.1.7	GRY	Alpha	VOC
EPI_ISL_2189613	Gujarat	2021-03-26	20I/501Y.V1	B.1.1.7	GRY	Alpha	VOC
EPI_ISL_2189614	Gujarat	2021-03-26	21A	B.1.617.1	G	Kappa	VOI
EPI_ISL_2189615	Gujarat	2021-03-26	20I/501Y.V1	B.1.1.7	GRY	Alpha	VOC
EPI_ISL_2189617	Gujarat	2021-04-01	20I/501Y.V1	B.1.1.7	GRY	Alpha	VOC
EPI_ISL_2189618	Gujarat	2021-03-24	20A	B.1.36.29	GH	Others	NA
EPI_ISL_2189619	Gujarat	2021-03-24	20I/501Y.V1	B.1.1.7	GRY	Alpha	VOC
EPI_ISL_2189620	Gujarat	2021-03-26	21A	B.1.617.1	G	Kappa	VOI
EPI_ISL_2189621	Gujarat	2021-03-26	21A	B.1.617.1	G	Kappa	VOI
EPI_ISL_2189622	Gujarat	2021-03-26	20I/501Y.V1	B.1.1.7	GRY	Alpha	VOC
EPI_ISL_2189623	Gujarat	2021-03-31	20I/501Y.V1	B.1.1.7	GRY	Alpha	VOC
EPI_ISL_2189624	Gujarat	2021-04-01	20I/501Y.V1	B.1.1.7	GRY	Alpha	VOC
EPI_ISL_2189625	Gujarat	2021-04-01	20I/501Y.V1	B.1.1.7	GRY	Alpha	VOC
EPI_ISL_2189626	Gujarat	2021-03-24	20A	B.1.36.8	GH	Others	NA
EPI_ISL_2189627	Gujarat	2021-03-24	21A	B.1.617.1	G	Kappa	VOI
EPI_ISL_2189629	Gujarat	2021-03-26	21A	B.1.617.1	G	Kappa	VOI
EPI_ISL_2189630	Gujarat	2021-03-26	21A	B.1.617.1	G	Kappa	VOI
EPI_ISL_2189633	Gujarat	2021-04-01	20I/501Y.V1	B.1.1.7	GRY	Alpha	VOC
EPI_ISL_2189635	Gujarat	2021-03-24	21A	B.1.617.1	G	Kappa	VOI
EPI_ISL_2189636	Gujarat	2021-03-26	21A	B.1.617.1	G	Kappa	VOI
EPI_ISL_2189638	Gujarat	2021-04-01	21A	B.1.617.2	G	Delta	VOC
EPI_ISL_2189639	Gujarat	2021-04-02	21A	B.1.617.2	G	Delta	VOC
EPI_ISL_2189680	Gujarat	2021-04-01	20I/501Y.V1	B.1.1.7	GRY	Alpha	VOC
EPI_ISL_2189681	Gujarat	2021-04-02	21A	B.1.617.1	G	Kappa	VOI
EPI_ISL_2189682	Gujarat	2021-04-06	21A	B.1.617.1	G	Kappa	VOI
EPI_ISL_2189683	Gujarat	2021-04-10	21A	B.1.617.1	G	Kappa	VOI
EPI_ISL_2189684	Gujarat	2021-04-10	21A	B.1.617.1	G	Kappa	VOI
EPI_ISL_2189687	Gujarat	2021-04-02	21A	B.1.617.1	G	Kappa	VOI
EPI_ISL_2189688	Gujarat	2021-04-02	20I/501Y.V1	B.1.1.7	GRY	Alpha	VOC
EPI_ISL_2189689	Gujarat	2021-04-10	21A	B.1.617.1	G	Kappa	VOI
EPI_ISL_2189691	Gujarat	2021-04-10	21A	B.1.617.2	G	Delta	VOC
EPI_ISL_2189693	Gujarat	2021-04-02	21A	B.1.617.1	G	Kappa	VOI
EPI_ISL_2189694	Gujarat	2021-04-02	21A	B.1.617.1	G	Kappa	VOI
EPI_ISL_2189695	Gujarat	2021-04-02	20B	B.1.1.216	GR	Others	NA
EPI_ISL_2189696	Gujarat	2021-04-10	21A	B.1.617.1	G	Kappa	VOI
EPI_ISL_2189698	Gujarat	2021-04-10	21A	B.1.617.2	G	Delta	VOC
EPI_ISL_2189699	Gujarat	2021-04-10	21A	B.1.617.2	G	Delta	VOC
EPI_ISL_2231599	Andhra_Pradesh	2021-04-17	21A	B.1.617.2	G	Delta	VOC
EPI_ISL_2231705	Andhra_Pradesh	2021-03-05	20A	B.1.36.29	GH	Others	NA
EPI_ISL_2231706	Andhra_Pradesh	2021-04-16	21A	B.1.617.2	G	Delta	VOC
EPI_ISL_2231711	Andhra_Pradesh	2021-04-15	21A	B.1.617.2	G	Delta	VOC
EPI_ISL_2231712	Andhra_Pradesh	2021-04-15	21A	B.1.617.2	G	Delta	VOC
EPI_ISL_2231713	Andhra_Pradesh	2021-04-16	21A	B.1.617.2	G	Delta	VOC
EPI_ISL_2231715	Andhra_Pradesh	2021-04-20	21A	B.1.617.1	G	Kappa	VOI
EPI_ISL_2231728	Andhra_Pradesh	2021-04-15	21A	B.1.617.2	G	Delta	VOC
EPI_ISL_2231731	Andhra_Pradesh	2021-03-03	20A	B.1.560	G	Others	NA
EPI_ISL_2231732	Andhra_Pradesh	2021-04-16	21A	B.1.617.2	G	Delta	VOC
EPI_ISL_2231734	Andhra_Pradesh	2021-04-20	21A	B.1.617.1	G	Kappa	VOI
EPI_ISL_2231735	Andhra_Pradesh	2021-04-20	20I/501Y.V1	B.1.1.7	GR	Alpha	VOC
EPI_ISL_2231738	Andhra_Pradesh	2021-04-20	21A	B.1.617.2	G	Delta	VOC
EPI_ISL_2231739	Andhra_Pradesh	2021-04-15	21A	B.1.617.2	G	Delta	VOC
EPI_ISL_2231743	Andhra_Pradesh	2021-03-31	21A	B.1.617.1	G	Kappa	VOI
EPI_ISL_2231745	Andhra_Pradesh	2021-03-08	20A	B.1	G	Others	NA
EPI_ISL_2231746	Andhra_Pradesh	2021-04-20	21A	B.1.617.2	G	Delta	VOC
EPI_ISL_2231747	Andhra_Pradesh	2021-04-20	21A	B.1.617.2	G	Delta	VOC
EPI_ISL_2231748	Andhra_Pradesh	2021-04-16	21A	B.1.617.2	G	Delta	VOC
EPI_ISL_2272900	Puducherry	2021-04-17	21A	B.1.617.2	G	Delta	VOC
EPI_ISL_2272901	Puducherry	2021-04-18	21A	B.1.617.2	G	Delta	VOC
EPI_ISL_2272902	Puducherry	2021-04-18	21A	B.1	G	Others	NA
EPI_ISL_2272903	Puducherry	2021-04-19	21A	B.1.617.2	G	Delta	VOC
EPI_ISL_2272904	Puducherry	2021-04-19	21A	B.1.617.2	G	Delta	VOC
EPI_ISL_2272905	Tamil_Nadu	2021-04-19	21A	B.1.617.2	G	Delta	VOC
EPI_ISL_2272907	Puducherry	2021-04-20	20I/501Y.V1	B.1.1.7	GR	Alpha	VOC
EPI_ISL_2272908	Puducherry	2021-04-20	21A	B.1.617.2	G	Delta	VOC
EPI_ISL_2272909	Puducherry	2021-04-20	21A	B.1.617.1	G	Kappa	VOI
EPI_ISL_2272910	Puducherry	2021-04-20	21A	B.1.617.2	G	Delta	VOC
EPI_ISL_2272911	Puducherry	2021-04-20	21A	B.1.617.2	G	Delta	VOC
EPI_ISL_2272912	Puducherry	2021-04-21	21A	B.1.617.2	G	Delta	VOC
EPI_ISL_2272913	Puducherry	2021-04-21	21A	B.1.617.2	G	Delta	VOC
EPI_ISL_2272914	Puducherry	2021-04-21	21A	B.1.617.2	G	Delta	VOC
EPI_ISL_2272915	Puducherry	2021-04-21	20I/501Y.V1	B.1.1.7	GR	Alpha	VOC
EPI_ISL_2272917	Puducherry	2021-04-21	21A	B.1.617.2	G	Delta	VOC
EPI_ISL_2272918	Puducherry	2021-04-21	21A	B.1.617.2	G	Delta	VOC
EPI_ISL_2272919	Tamil_Nadu	2021-04-22	21A	B.1.617.2	G	Delta	VOC
EPI_ISL_2272920	Puducherry	2021-04-22	21A	B.1.617.2	G	Delta	VOC
EPI_ISL_2272921	Tamil_Nadu	2021-04-22	21A	B.1.617.1	G	Kappa	VOI
EPI_ISL_2272923	Puducherry	2021-04-23	21A	B.1.617.2	G	Delta	VOC
EPI_ISL_2272924	Puducherry	2021-04-23	21A	B.1.617.2	G	Delta	VOC
EPI_ISL_2272925	Puducherry	2021-04-23	20H/501Y.V2	B.1.351	GH	Beta	VOC
EPI_ISL_2272926	Puducherry	2021-04-23	21A	B.1.617.2	G	Delta	VOC
EPI_ISL_2272927	Puducherry	2021-04-23	20I/501Y.V1	B.1.1.7	GR	Alpha	VOC
EPI_ISL_2272930	Tamil_Nadu	2021-04-24	20I/501Y.V1	B.1.1.7	GR	Alpha	VOC
EPI_ISL_2272931	Puducherry	2021-04-25	21A	B.1.617.1	G	Kappa	VOI
EPI_ISL_2272932	Puducherry	2021-04-25	21A	B.1.617.2	G	Delta	VOC
EPI_ISL_2272933	Puducherry	2021-04-25	21A	B.1.617.2	G	Delta	VOC
EPI_ISL_2272936	Puducherry	2021-04-26	21A	B.1.617.2	G	Delta	VOC
EPI_ISL_2272937	Tamil_Nadu	2021-04-26	21A	B.1.617.2	G	Delta	VOC
EPI_ISL_1838708	Andhra_Pradesh	2021-04-12	20I/501Y.V1	B.1.1	GR	Others	NA
EPI_ISL_1838711	Andhra_Pradesh	2021-04-12	21A	B.1.393	G	Others	NA
EPI_ISL_1838712	Andhra_Pradesh	2021-04-12	21A	B.1.617.2	G	Delta	VOC
EPI_ISL_1838716	Telangana	2021-03-08	20B	B.1.1.306	GR	Others	NA
EPI_ISL_1838718	Telangana	2021-03-08	20A	B.1.525	G	Eta	VOI
EPI_ISL_1838719	Telangana	2021-03-08	20A	B.1.525	G	Eta	VOI
EPI_ISL_1838722	Telangana	2021-03-08	20A	B.1.525	G	Eta	VOI
EPI_ISL_1838725	Telangana	2021-03-08	20H/501Y.V2	B.1.351	GH	Beta	VOC
EPI_ISL_1838729	Telangana	2021-03-08	20A	B.1	G	Others	NA
EPI_ISL_1838730	Telangana	2021-03-09	20I/501Y.V1	B.1.1.7	GR	Alpha	VOC
EPI_ISL_1838731	Telangana	2021-03-09	20H/501Y.V2	B.1.351	GH	Beta	VOC
EPI_ISL_1838732	Telangana	2021-03-09	20I/501Y.V1	B.1.1.7	GR	Alpha	VOC
EPI_ISL_1838733	Telangana	2021-03-09	20I/501Y.V1	B.1.1.7	GR	Alpha	VOC
EPI_ISL_1838736	Telangana	2021-03-10	20I/501Y.V1	B.1.1	GR	Others	NA
EPI_ISL_1838737	Telangana	2021-03-10	20H/501Y.V2	B.1.351	GH	Beta	VOC
EPI_ISL_1838738	Telangana	2021-03-10	20I/501Y.V1	B.1.1.7	GR	Alpha	VOC
EPI_ISL_1838739	Telangana	2021-03-10	20B	B.1.1	GR	Others	NA
EPI_ISL_1838740	Telangana	2021-03-13	20D	C.36	GR	Others	NA
EPI_ISL_1838744	Telangana	2021-03-15	19B	A	S	Others	NA
EPI_ISL_1838745	Telangana	2021-03-15	20I/501Y.V1	B.1.1.7	GR	Alpha	VOC
EPI_ISL_1838746	Telangana	2021-03-15	20B	B.1.1	GR	Others	NA
EPI_ISL_1838750	Telangana	2021-03-16	20H/501Y.V2	B.1.351	GH	Beta	VOC
EPI_ISL_1838755	Telangana	2021-03-16	20H/501Y.V2	B.1.351	GH	Beta	VOC
EPI_ISL_1908688	Delhi	2021-03-02	20B	B.1.1	GR	Others	NA
EPI_ISL_1908690	Delhi	2021-03-02	20G	B.1.2	GH	Others	NA
EPI_ISL_1908698	Delhi	2021-03-02	20I/501Y.V1	B.1.1.7	GRY	Alpha	VOC
EPI_ISL_1908700	Delhi	2021-03-03	20H/501Y.V2	B.1.351	GH	Beta	VOC
EPI_ISL_1908703	Delhi	2021-03-04	20I/501Y.V1	B.1.1.7	GRY	Alpha	VOC
EPI_ISL_1908705	Delhi	2021-03-04	20I/501Y.V1	B.1.1.7	GRY	Alpha	VOC
EPI_ISL_1908707	Delhi	2021-03-04	20I/501Y.V1	B.1.1.7	GRY	Alpha	VOC
EPI_ISL_1908708	Delhi	2021-03-04	20H/501Y.V2	B.1.351	GH	Beta	VOC
EPI_ISL_1908709	Delhi	2021-03-04	20I/501Y.V1	B.1.1.7	G	Alpha	VOC
EPI_ISL_1916277	Maharashtra	2020-12-01	20B	B.1.1.192	GR	Others	NA
EPI_ISL_1916278	Maharashtra	2020-12-04	20A	B.1.221	G	Others	NA
EPI_ISL_1916280	Maharashtra	2020-12-15	20A	B.1.36.8	GH	Others	NA
EPI_ISL_1916281	Maharashtra	2020-12-20	20A	B.1.36.22	GH	Others	NA
EPI_ISL_1916290	Maharashtra	2020-12-04	20B	B.1.1	GR	Others	NA
EPI_ISL_1916293	Maharashtra	2020-12-21	20A	B.1.36.29	GH	Others	NA
EPI_ISL_1916296	Maharashtra	2021-01-12	20B	B.1.1	GR	Others	NA
EPI_ISL_1970200	Chandigarh	2020-12-13	20B	B.1.1.216	GR	Others	NA
EPI_ISL_1970201	Chandigarh	2020-12-09	20A	B.1	GH	Others	NA
EPI_ISL_1970202	Chandigarh	2020-12-11	20A	B.1.36	GH	Others	NA
EPI_ISL_1970204	Chandigarh	2020-12-11	20A	B.1.36	GH	Others	NA
EPI_ISL_1970205	Chandigarh	2020-12-13	20A	B.1.36	GH	Others	NA
EPI_ISL_1970207	Uttarakhand	2021-04-06	20I/501Y.V1	B.1.1.7	GRY	Alpha	VOC
EPI_ISL_1970210	Uttarakhand	2021-04-05	20I/501Y.V1	B.1.1.7	GRY	Alpha	VOC
EPI_ISL_1970213	Uttarakhand	2021-04-03	20I/501Y.V1	B.1.1.7	GRY	Alpha	VOC
EPI_ISL_1970214	Uttarakhand	2021-04-03	20I/501Y.V1	B.1.1.7	GRY	Alpha	VOC
EPI_ISL_1970215	Uttarakhand	2021-04-03	21A	B.1.617.2	G	Delta	VOC
EPI_ISL_1970216	Delhi	2021-04-03	20I/501Y.V1	B.1.1.7	GRY	Alpha	VOC
EPI_ISL_1970217	Delhi	2021-04-03	21A	B.1.617.1	G	Kappa	VOI
EPI_ISL_1970218	Delhi	2021-04-06	20I/501Y.V1	B.1.1.7	GRY	Alpha	VOC
EPI_ISL_1970220	Delhi	2021-03-04	20I/501Y.V1	B.1.1.7	GRY	Alpha	VOC
EPI_ISL_1970221	Delhi	2021-03-04	21A	B.1.617.2	G	Delta	VOC
EPI_ISL_1970223	Delhi	2021-03-04	21A	B.1.617.2	G	Delta	VOC
EPI_ISL_1970224	Delhi	2021-03-04	21A	B.1.617.2	G	Delta	VOC
EPI_ISL_1970228	Delhi	2020-12-05	20A	B.1.177	G	Others	NA
EPI_ISL_1970229	Delhi	2020-12-06	20B	B.1.1.216	GR	Others	NA
EPI_ISL_1970230	Delhi	2020-12-06	20A	B.1.36	GH	Others	NA
EPI_ISL_1970232	Delhi	2020-12-13	20A	B.1.36	GH	Others	NA
EPI_ISL_1970233	Delhi	2021-01-12	20A	B.1.36	GH	Others	NA
EPI_ISL_1970235	Delhi	2021-04-05	20I/501Y.V1	B.1.1.7	GRY	Alpha	VOC
EPI_ISL_1970236	Delhi	2021-04-01	20I/501Y.V1	B.1.1.7	GRY	Alpha	VOC
EPI_ISL_1970237	Delhi	2021-04-02	21A	B.1.617.2	G	Delta	VOC
EPI_ISL_1970241	Delhi	2021-04-02	21A	B.1.617.2	G	Delta	VOC
EPI_ISL_1970243	Delhi	2021-04-02	21A	B.1.617.2	G	Delta	VOC
EPI_ISL_1970247	Delhi	2021-04-06	21A	B.1.617.2	G	Delta	VOC
EPI_ISL_1970248	Delhi	2021-04-05	20I/501Y.V1	B.1.1.7	GRY	Alpha	VOC
EPI_ISL_1970249	Delhi	2021-04-05	21A	B.1.617.2	G	Delta	VOC
EPI_ISL_1970250	Delhi	2021-04-05	21A	B.1.617.2	G	Delta	VOC
EPI_ISL_1970251	Delhi	2021-04-05	21A	B.1.617.2	G	Delta	VOC
EPI_ISL_1970252	Delhi	2021-04-05	20I/501Y.V1	B.1.1.7	GRY	Alpha	VOC
EPI_ISL_1970255	Uttarakhand	2021-03-23	21A	B.1.617.1	G	Kappa	VOI
EPI_ISL_1970256	Uttarakhand	2021-03-23	21A	B.1.617.1	G	Kappa	VOI
EPI_ISL_1970257	Chandigarh	2021-04-01	20I/501Y.V1	B.1.1.7	GRY	Alpha	VOC
EPI_ISL_1970258	Chandigarh	2021-04-01	20I/501Y.V1	B.1.1.7	GRY	Alpha	VOC
EPI_ISL_1970259	Chandigarh	2021-04-01	20I/501Y.V1	B.1.1.7	GRY	Alpha	VOC
EPI_ISL_1970260	Chandigarh	2021-04-02	20I/501Y.V1	B.1.1.7	GRY	Alpha	VOC
EPI_ISL_1970261	Chandigarh	2021-04-02	20I/501Y.V1	B.1.1.7	GRY	Alpha	VOC
EPI_ISL_1970262	Chandigarh	2021-04-02	20I/501Y.V1	B.1.1.7	GRY	Alpha	VOC
EPI_ISL_1970263	Chandigarh	2021-04-02	20I/501Y.V1	B.1.1.7	GRY	Alpha	VOC
EPI_ISL_1970264	Chandigarh	2021-04-03	20I/501Y.V1	B.1.1.7	GRY	Alpha	VOC
EPI_ISL_1970265	Chandigarh	2021-04-04	20I/501Y.V1	B.1.1.7	GRY	Alpha	VOC
EPI_ISL_1970266	Chandigarh	2021-04-05	20I/501Y.V1	B.1.1.7	GRY	Alpha	VOC
EPI_ISL_1970267	Chandigarh	2021-04-05	21A	B.1.617.2	G	Delta	VOC
EPI_ISL_1970268	Chandigarh	2021-04-05	20I/501Y.V1	B.1.1.7	GRY	Alpha	VOC
EPI_ISL_1970270	Delhi	2021-04-05	20I/501Y.V1	B.1.1.7	GRY	Alpha	VOC
EPI_ISL_1970271	Delhi	2021-04-07	20I/501Y.V1	B.1.1.7	GRY	Alpha	VOC
EPI_ISL_1970272	Delhi	2021-04-07	20I/501Y.V1	B.1.1.7	GRY	Alpha	VOC
EPI_ISL_1970273	Delhi	2021-04-07	21A	B.1.617.1	G	Kappa	VOI
EPI_ISL_1970274	Delhi	2021-04-07	21A	B.1.617.2	G	Delta	VOC
EPI_ISL_1970276	Delhi	2021-04-05	21A	B.1.617.2	G	Delta	VOC
EPI_ISL_1970277	Delhi	2021-04-05	21A	B.1.617.2	G	Delta	VOC
EPI_ISL_1970278	Delhi	2021-04-05	21A	B.1.617.2	G	Delta	VOC
EPI_ISL_1970279	Delhi	2021-04-05	21A	B.1.617.2	G	Delta	VOC
EPI_ISL_1970280	Delhi	2021-04-07	21A	B.1.617.1	G	Kappa	VOI
EPI_ISL_1970281	Delhi	2021-04-07	21A	B.1.617.2	G	Delta	VOC
EPI_ISL_1970282	Delhi	2021-04-07	20I/501Y.V1	B.1.1.7	GRY	Alpha	VOC
EPI_ISL_1970283	Delhi	2021-04-07	21A	B.1.617.1	G	Kappa	VOI
EPI_ISL_1970284	Delhi	2021-03-31	20I/501Y.V1	B.1.1.7	GRY	Alpha	VOC
EPI_ISL_1970285	Delhi	2021-04-01	21A	B.1.617.1	G	Kappa	VOI
EPI_ISL_1970287	Delhi	2021-04-04	21A	B.1.617.1	G	Kappa	VOI
EPI_ISL_1970288	Delhi	2021-04-11	21A	B.1.617.2	G	Delta	VOC
EPI_ISL_1970292	Delhi	2021-03-09	21A	B.1.617.1	G	Kappa	VOI
EPI_ISL_1970294	Delhi	2021-03-06	21A	B.1.617.1	G	Kappa	VOI
EPI_ISL_2017770	Gujarat	2021-04-20	21A	B.1.617.2	G	Delta	VOC
EPI_ISL_2017771	Gujarat	2021-04-20	21A	B.1.617.2	G	Delta	VOC
EPI_ISL_2017772	Gujarat	2021-04-20	21A	B.1.617.2	G	Delta	VOC
EPI_ISL_2017774	Gujarat	2021-04-20	21A	B.1.617.2	G	Delta	VOC
EPI_ISL_2017775	Gujarat	2021-04-21	21A	B.1.617.2	G	Delta	VOC
EPI_ISL_2017776	Gujarat	2021-04-18	21A	B.1.617.2	G	Delta	VOC
EPI_ISL_2017777	Gujarat	2021-04-18	21A	B.1.617.2	G	Delta	VOC
EPI_ISL_2017778	Gujarat	2021-04-19	21A	B.1.617.2	G	Delta	VOC
EPI_ISL_2017779	Gujarat	2021-04-21	21A	B.1.617.2	G	Delta	VOC
EPI_ISL_2017780	Gujarat	2021-04-21	21A	B.1.617.2	G	Delta	VOC
EPI_ISL_2017781	Gujarat	2021-04-21	21A	B.1.617.2	G	Delta	VOC
EPI_ISL_2017782	Gujarat	2021-04-21	20A	B.1	G	Others	NA
EPI_ISL_2020934	Gujarat	2021-04-10	21A	B.1.617.2	G	Delta	VOC
EPI_ISL_2020935	Gujarat	2021-04-10	21A	B.1.617.2	G	Delta	VOC
EPI_ISL_2020936	Gujarat	2021-04-10	21A	B.1.617.2	G	Delta	VOC
EPI_ISL_2020937	Gujarat	2021-04-10	21A	B.1.617.2	G	Delta	VOC
EPI_ISL_2020938	Gujarat	2021-04-10	21A	B.1.153	G	Others	NA
EPI_ISL_2020939	Gujarat	2021-04-10	21A	B.1.617.2	G	Delta	VOC
EPI_ISL_2020940	Gujarat	2021-04-10	21A	B.1.617.2	G	Delta	VOC
EPI_ISL_2020941	Gujarat	2021-04-10	21A	B.1.617.2	G	Delta	VOC
EPI_ISL_2020942	Gujarat	2021-04-10	21A	B.1.617.2	G	Delta	VOC
EPI_ISL_2020943	Gujarat	2021-04-10	21A	B.1.617.2	G	Delta	VOC
EPI_ISL_2020944	Gujarat	2021-04-10	21A	B.1.617.2	G	Delta	VOC
EPI_ISL_2020950	Gujarat	2021-04-10	21A	B.1.617.2	G	Delta	VOC
EPI_ISL_2020951	Gujarat	2021-04-10	21A	B.1.617.2	G	Delta	VOC
EPI_ISL_2020954	Gujarat	2021-04-10	21A	B.1.617.2	G	Delta	VOC
EPI_ISL_2020955	Gujarat	2021-04-10	21A	B.1.617.2	G	Delta	VOC
EPI_ISL_2099630	Himachal_Pradesh	2020-12-14	20A	B.1.36.7	GH	Others	NA
EPI_ISL_2099633	Himachal_Pradesh	2020-12-17	20A	B.1.36.8	GH	Others	NA
EPI_ISL_2099634	Himachal_Pradesh	2020-11-27	20A	B.1.36	GH	Others	NA
EPI_ISL_2099637	Himachal_Pradesh	2020-12-05	20B	B.1.1.216	GR	Others	NA
EPI_ISL_2099638	Himachal_Pradesh	2020-12-03	20A	B.1.36	GH	Others	NA
EPI_ISL_2099639	Himachal_Pradesh	2020-12-03	20A	B.1.36	GH	Others	NA
EPI_ISL_2099653	Himachal_Pradesh	2020-12-17	20B	B.1.1.216	GR	Others	NA
EPI_ISL_2099655	Himachal_Pradesh	2020-12-17	20A	B.1.36	GH	Others	NA
EPI_ISL_2099656	Himachal_Pradesh	2020-12-18	20B	B.1.1.216	GR	Others	NA
EPI_ISL_2099659	Himachal_Pradesh	2021-01-24	20A	B.1.36	GH	Others	NA
EPI_ISL_2099661	Himachal_Pradesh	2021-02-04	20A	B.1.36	GH	Others	NA
EPI_ISL_2099662	Himachal_Pradesh	2021-01-15	20B	B.1.1.216	GR	Others	NA
EPI_ISL_2099663	Himachal_Pradesh	2021-01-22	20A	B.1.36	GH	Others	NA
EPI_ISL_2099666	Himachal_Pradesh	2021-01-18	20A	B.1.36	GH	Others	NA
EPI_ISL_2099671	Himachal_Pradesh	2021-02-18	20A	B.1.36	GH	Others	NA
EPI_ISL_2099674	Himachal_Pradesh	2021-03-02	20A	B.1.36	GH	Others	NA
EPI_ISL_2099675	Himachal_Pradesh	2021-03-02	20A	B.1.36	GH	Others	NA
EPI_ISL_2099676	Himachal_Pradesh	2021-03-03	20A	B.1.36	GH	Others	NA
EPI_ISL_2099678	Himachal_Pradesh	2020-11-22	20A	B.1.36.8	GH	Others	NA
EPI_ISL_2099680	Himachal_Pradesh	2020-12-13	20A	B.1.36	GH	Others	NA
EPI_ISL_2099681	Himachal_Pradesh	2020-12-22	20B	B.1.1.216	GR	Others	NA
EPI_ISL_2099683	Himachal_Pradesh	2020-12-13	20B	B.1.1	GR	Others	NA
EPI_ISL_2099684	Himachal_Pradesh	2020-11-22	20A	B.1.36	GH	Others	NA
EPI_ISL_2099685	Himachal_Pradesh	2020-12-14	20A	B.1.36	GH	Others	NA
EPI_ISL_2099686	Himachal_Pradesh	2020-12-13	20B	B.1.1.216	GR	Others	NA
EPI_ISL_2099687	Himachal_Pradesh	2020-11-22	20A	B.1.36.29	GH	Others	NA
EPI_ISL_2099689	Himachal_Pradesh	2020-11-26	20A	B.1.36	GH	Others	NA
EPI_ISL_2099692	Himachal_Pradesh	2020-12-21	20A	B.1.36	GH	Others	NA
EPI_ISL_2099694	Himachal_Pradesh	2020-12-21	20A	B.1.36	GH	Others	NA
EPI_ISL_2099699	Himachal_Pradesh	2020-12-21	20A	B.1.36	GH	Others	NA
EPI_ISL_2106930	Rajasthan	2020-10-29	20A	B.1	G	Others	NA
EPI_ISL_2106931	Rajasthan	2020-10-29	20B	B.1.1.83	GR	Others	NA
EPI_ISL_2106932	Rajasthan	2020-10-29	20B	B.1.1.83	GR	Others	NA
EPI_ISL_2106933	Rajasthan	2020-10-29	20A	B.1.36	GH	Others	NA
EPI_ISL_2106934	Rajasthan	2020-10-30	20A	B.1.36	GH	Others	NA
EPI_ISL_2106935	Rajasthan	2020-10-30	20A	B.1.36	GH	Others	NA
EPI_ISL_2106936	Rajasthan	2020-10-31	20B	B.1.1.306	GR	Others	NA
EPI_ISL_2106938	Andhra_Pradesh	2021-02-24	20B	B.1.1	GR	Others	NA
EPI_ISL_2106939	Andhra_Pradesh	2021-02-25	20A	B.1.36.29	GH	Others	NA
EPI_ISL_2106940	Andhra_Pradesh	2021-02-26	20A	B.1.36.8	GH	Others	NA
EPI_ISL_2106941	Andhra_Pradesh	2021-02-27	20A	B.1.36.29	GH	Others	NA
EPI_ISL_2106943	Andhra_Pradesh	2021-03-01	20A	B.1.36.29	GH	Others	NA
EPI_ISL_2106944	Andhra_Pradesh	2021-03-02	20A	B.1.36.29	GH	Others	NA
EPI_ISL_2106947	Andhra_Pradesh	2021-03-05	20A	B.1.36.29	GH	Others	NA
EPI_ISL_2106948	Andhra_Pradesh	2021-03-06	20A	B.1.36.29	GH	Others	NA
EPI_ISL_2106950	Andhra_Pradesh	2021-03-08	20B	B.1.1.354	GR	Others	NA
EPI_ISL_2106951	Andhra_Pradesh	2021-03-09	20A	B.1	GH	Others	NA
EPI_ISL_2106953	Andhra_Pradesh	2021-03-12	20B	B.1.1	GR	Others	NA
EPI_ISL_2106954	Andhra_Pradesh	2021-03-13	20A	B.1	G	Others	NA
EPI_ISL_2106957	Andhra_Pradesh	2021-03-16	20A	B.1.36.29	GH	Others	NA
EPI_ISL_2106958	Andhra_Pradesh	2021-03-17	20A	B.1.36.29	GH	Others	NA
EPI_ISL_2106964	Andhra_Pradesh	2021-03-25	20A	B.1.36.29	GH	Others	NA
EPI_ISL_2106966	Andhra_Pradesh	2021-03-30	21A	B.1.617.1	G	Kappa	VOI
EPI_ISL_2106967	Andhra_Pradesh	2021-03-31	21A	B.1.393	G	Others	NA
EPI_ISL_2106968	Telangana	2021-04-03	20I/501Y.V1	B.1.1.7	GR	Alpha	VOC
EPI_ISL_2106970	Telangana	2021-04-06	20B	B.1.1	GR	Others	NA
EPI_ISL_2106973	Telangana	2021-04-18	20I/501Y.V1	B.1.1.7	GRY	Alpha	VOC
EPI_ISL_2131561	Maharashtra	2021-04-30	21A	B.1.617.2	G	Delta	VOC
EPI_ISL_2131562	Maharashtra	2021-04-30	21A	B.1.617.2	G	Delta	VOC
EPI_ISL_2131565	Maharashtra	2021-04-30	21A	B.1.617.2	G	Delta	VOC
EPI_ISL_2131567	Maharashtra	2021-05-02	21A	B.1.617.2	G	Delta	VOC
EPI_ISL_2131568	Maharashtra	2021-05-03	21A	B.1.617.2	G	Delta	VOC
EPI_ISL_2151166	Karnataka	2021	21A	B.1.617.2	G	Delta	VOC
EPI_ISL_2151167	Karnataka	2021	21A	B.1.617.1	G	Kappa	VOI
EPI_ISL_2151168	Karnataka	2021	20I/501Y.V1	B.1.1.7	GR	Alpha	VOC
EPI_ISL_2151169	Karnataka	2021	21A	B.1.617.2	G	Delta	VOC
EPI_ISL_2151174	Karnataka	2021	21A	B.1	G	Others	NA
EPI_ISL_2156853	Telangana	2021-04-13	21A	B.1.617.1	G	Kappa	VOI
EPI_ISL_2156857	Telangana	2021-04-13	21A	B.1.617.2	G	Delta	VOC
EPI_ISL_2156858	Telangana	2021-04-13	21A	B.1.617.2	G	Delta	VOC
EPI_ISL_2156859	Telangana	2021-04-13	21A	B.1.617.2	G	Delta	VOC
EPI_ISL_2156860	Telangana	2021-04-13	21A	B.1.617.2	G	Delta	VOC
EPI_ISL_2156861	Telangana	2021-04-13	21A	B.1.617.1	G	Kappa	VOI
EPI_ISL_2156862	Telangana	2021-04-14	21A	B.1.617.2	G	Delta	VOC
EPI_ISL_2156863	Telangana	2021-04-14	21A	B.1.617.2	G	Delta	VOC
EPI_ISL_2156864	Telangana	2021-04-14	21A	B.1.617.2	G	Delta	VOC
EPI_ISL_2156865	Telangana	2021-04-14	21A	B.1.617.2	G	Delta	VOC
EPI_ISL_2156866	Telangana	2021-04-14	21A	B.1.617.2	G	Delta	VOC
EPI_ISL_2156867	Telangana	2021-04-14	21A	B.1.617.2	G	Delta	VOC
EPI_ISL_2156869	Telangana	2021-04-14	21A	B.1.617.2	G	Delta	VOC
EPI_ISL_2158578	Delhi	2020-12-06	20A	B.1.36	GH	Others	NA
EPI_ISL_2158580	Delhi	2020-12-01	20A	B.1.36	GH	Others	NA
EPI_ISL_2158581	Delhi	2020-12-01	20A	B.1.36	GH	Others	NA
EPI_ISL_2158582	Delhi	2020-12-01	20A	B.1.36	GH	Others	NA
EPI_ISL_2158585	Delhi	2020-11-22	20A	B.1.36	GH	Others	NA
EPI_ISL_2158586	Delhi	2020-11-21	20A	B.1.36	GH	Others	NA
EPI_ISL_2189790	Maharashtra	2021-04-14	21A	B.1.617.1	G	Kappa	VOI
EPI_ISL_2189791	Maharashtra	2021-04-14	21A	B.1.617.2	G	Delta	VOC
EPI_ISL_2189792	Maharashtra	2021-04-14	21A	B.1.617.2	G	Delta	VOC
EPI_ISL_2189793	Maharashtra	2021-04-06	20I/501Y.V1	B.1.1.7	GRY	Alpha	VOC
EPI_ISL_2189794	Maharashtra	2021-04-06	21A	B.1.617.1	G	Kappa	VOI
EPI_ISL_2189797	Maharashtra	2021-04-14	21A	B.1.617.1	G	Kappa	VOI
EPI_ISL_2189798	Maharashtra	2021-04-14	21A	B.1.617.1	G	Kappa	VOI
EPI_ISL_2189799	Maharashtra	2021-04-14	21A	B.1.617.1	G	Kappa	VOI
EPI_ISL_2231702	Andhra_Pradesh	2021-04-20	21A	B.1.617.2	G	Delta	VOC
EPI_ISL_2231703	Andhra_Pradesh	2021-04-20	21A	B.1.617.2	G	Delta	VOC
EPI_ISL_2231716	Andhra_Pradesh	2021-04-20	21A	B.1.617.2	G	Delta	VOC
EPI_ISL_2231721	Andhra_Pradesh	2021-04-16	21A	B.1	G	Others	NA
EPI_ISL_2231724	Andhra_Pradesh	2021-03-08	20I/501Y.V1	B.1.1.7	GR	Alpha	VOC
EPI_ISL_2231725	Andhra_Pradesh	2021-03-08	20B	B.1.1	GR	Others	NA
EPI_ISL_2231726	Andhra_Pradesh	2021-04-16	21A	B.1.617.2	G	Delta	VOC
EPI_ISL_2231749	Andhra_Pradesh	2021-04-17	21A	B.1.617.1	G	Kappa	VOI
EPI_ISL_2231750	Andhra_Pradesh	2021-04-20	20A	B.1.617.2	G	Delta	VOC
EPI_ISL_2231752	Andhra_Pradesh	2021-04-16	21A	B.1.617.2	G	Delta	VOC
EPI_ISL_2231754	Andhra_Pradesh	2021-04-17	21A	B.1.617.2	G	Delta	VOC
EPI_ISL_2231757	Andhra_Pradesh	2021-04-19	21A	B.1.617.2	G	Delta	VOC
EPI_ISL_2231758	Andhra_Pradesh	2021-04-19	21A	B.1.617.1	G	Kappa	VOI
EPI_ISL_2231759	Andhra_Pradesh	2021-04-19	21A	B.1.617.2	G	Delta	VOC
EPI_ISL_2231760	Andhra_Pradesh	2021-04-19	21A	B.1.617.1	G	Kappa	VOI
EPI_ISL_2231761	Andhra_Pradesh	2021-04-19	21A	B.1.617.2	G	Delta	VOC
EPI_ISL_2231762	Andhra_Pradesh	2021-04-19	21A	B.1.617.1	G	Kappa	VOI
EPI_ISL_2231763	Andhra_Pradesh	2021-04-19	21A	B.1.617.1	G	Kappa	VOI
EPI_ISL_2231764	Andhra_Pradesh	2021-04-19	21A	B.1.617.1	G	Kappa	VOI
EPI_ISL_2231767	Andhra_Pradesh	2021-04-19	21A	B.1.617.2	G	Delta	VOC
EPI_ISL_2231769	Andhra_Pradesh	2021-04-21	21A	B.1	G	Others	NA
EPI_ISL_2231771	Andhra_Pradesh	2021-04-21	21A	B.1.617.1	G	Kappa	VOI
EPI_ISL_2231772	Andhra_Pradesh	2021-04-21	21A	B.1.617.2	G	Delta	VOC
EPI_ISL_2231773	Andhra_Pradesh	2021-04-21	21A	B.1.617.2	G	Delta	VOC
EPI_ISL_2231777	Andhra_Pradesh	2021-04-21	21A	B.1.617.2	G	Delta	VOC
EPI_ISL_2231779	Andhra_Pradesh	2021-04-21	21A	B.1.617.2	G	Delta	VOC
EPI_ISL_2231783	Andhra_Pradesh	2021-04-21	21A	B.1.617.1	G	Kappa	VOI
EPI_ISL_2231784	Andhra_Pradesh	2021-04-21	21A	B.1.617.2	G	Delta	VOC
EPI_ISL_2231792	Andhra_Pradesh	2021-03-08	20I/501Y.V1	B.1.1	G	Others	NA
EPI_ISL_2231794	Andhra_Pradesh	2021-03-08	21A	B.1.617.2	G	Delta	VOC
EPI_ISL_1838301	Maharashtra	2021-03-31	20A	B.1.617.2	G	Delta	VOC
EPI_ISL_1838309	Maharashtra	2021-03-31	21A	B.1.617.1	G	Kappa	VOI
EPI_ISL_1838312	Maharashtra	2021-03-31	21A	B.1.617.2	G	Delta	VOC
EPI_ISL_1838315	Maharashtra	2021-03-31	21A	B.1.617.2	G	Delta	VOC
EPI_ISL_1838318	Maharashtra	2021-03-31	21A	B.1.617.1	G	Kappa	VOI
EPI_ISL_1838322	Maharashtra	2021-03-31	21A	B.1.617.2	G	Delta	VOC
EPI_ISL_1838325	Maharashtra	2021-03-31	21A	B.1.617.1	G	Kappa	VOI
EPI_ISL_1838327	Maharashtra	2021-03-31	21A	B.1.617.2	G	Delta	VOC
EPI_ISL_1838333	Maharashtra	2021-03-31	21A	B.1.617.1	G	Kappa	VOI
EPI_ISL_1838337	Maharashtra	2021-03-31	21A	B.1.617.2	G	Delta	VOC
EPI_ISL_1838338	Maharashtra	2021-03-31	21A	B.1.617.1	G	Kappa	VOI
EPI_ISL_1838350	Andhra_Pradesh	2021-03-09	20I/501Y.V1	B.1.1.7	GR	Alpha	VOC
EPI_ISL_1838356	Andhra_Pradesh	2021-03-09	21A	B.1.617.1	G	Kappa	VOI
EPI_ISL_1838359	Andhra_Pradesh	2021-03-09	20I/501Y.V1	B.1.1.7	G	Alpha	VOC
EPI_ISL_1838741	Telangana	2021-03-13	20I/501Y.V1	B.1.1.7	GR	Alpha	VOC
EPI_ISL_1838748	Telangana	2021-03-15	20A	B.1.525	G	Eta	VOI
EPI_ISL_1838749	Telangana	2021-03-16	20A	B.1	G	Others	NA
EPI_ISL_1838761	Telangana	2021-03-16	21A	B.1.617.1	G	Kappa	VOI
EPI_ISL_1838762	Telangana	2021-03-16	20H/501Y.V2	B.1.351	GH	Beta	VOC
EPI_ISL_1838763	Telangana	2021-03-17	20A	B.1.36.29	GH	Others	NA
EPI_ISL_1838764	Telangana	2021-03-17	21A	B.1.617.1	G	Kappa	VOI
EPI_ISL_1838766	Telangana	2021-03-17	20I/501Y.V1	B.1.1.7	GR	Alpha	VOC
EPI_ISL_1838768	Telangana	2021-03-17	20A	B.1.525	G	Eta	VOI
EPI_ISL_1838769	Telangana	2021-03-17	20I/501Y.V1	B.1.1.7	GR	Alpha	VOC
EPI_ISL_1838770	Telangana	2021-03-18	20H/501Y.V2	B.1.351	GH	Beta	VOC
EPI_ISL_1838771	Telangana	2021-03-18	20B	B.1.1.326	GR	Others	NA
EPI_ISL_1838772	Telangana	2021-03-18	21A	B.1.617.3	G	Others	NA
EPI_ISL_1838774	Telangana	2021-03-18	20A	B.1.36.29	GH	Others	NA
EPI_ISL_1838775	Telangana	2021-03-18	20I/501Y.V1	B.1.1.7	GR	Alpha	VOC
EPI_ISL_1838776	Telangana	2021-03-18	21A	B.1.617.1	G	Kappa	VOI
EPI_ISL_1838777	Telangana	2021-03-18	21A	B.1.617.1	G	Kappa	VOI
EPI_ISL_1838778	Telangana	2021-03-18	21A	B.1.617.1	G	Kappa	VOI
EPI_ISL_1838779	Telangana	2021-03-18	21A	B.1.617.1	G	Kappa	VOI
EPI_ISL_1838780	Telangana	2021-03-18	21A	B.1.617.1	G	Kappa	VOI
EPI_ISL_1838785	Telangana	2021-03-24	20H/501Y.V2	B.1.351	GH	Beta	VOC
EPI_ISL_1838786	Telangana	2021-03-24	20A	B.1.525	G	Eta	VOI
EPI_ISL_1838787	Telangana	2021-03-24	21A	B.1.617.2	G	Delta	VOC
EPI_ISL_1838788	Telangana	2021-03-24	20H/501Y.V2	B.1.351	GH	Beta	VOC
EPI_ISL_1838789	Telangana	2021-03-24	20A	B.1.525	G	Eta	VOI
EPI_ISL_1838790	Telangana	2021-03-25	20I/501Y.V1	B.1.1.7	GR	Alpha	VOC
EPI_ISL_1838793	Telangana	2021-03-26	20A	B.1.393	G	Others	NA
EPI_ISL_1838795	Telangana	2021-03-26	20B	B.1.1	GR	Others	NA
EPI_ISL_1838798	Telangana	2021-03-26	20A	B.1.525	G	Eta	VOI
EPI_ISL_1838799	Telangana	2021-03-28	21A	B.1.617.1	G	Kappa	VOI
EPI_ISL_1908711	Delhi	2021-03-05	20I/501Y.V1	B.1.1.7	GRY	Alpha	VOC
EPI_ISL_1908712	Delhi	2021-03-05	20A	B.1.36	GH	Others	NA
EPI_ISL_1908715	Delhi	2021-03-05	20I/501Y.V1	B.1.1.7	G	Alpha	VOC
EPI_ISL_1908716	Delhi	2021-03-05	20I/501Y.V1	B.1.1.7	GRY	Alpha	VOC
EPI_ISL_1908718	Delhi	2021-03-06	20I/501Y.V1	B.1.1.7	GRY	Alpha	VOC
EPI_ISL_1908719	Delhi	2021-02-23	20I/501Y.V1	B.1.1.7	G	Alpha	VOC
EPI_ISL_1908725	Delhi	2021-03-08	21A	B.1.617.1	G	Kappa	VOI
EPI_ISL_1908726	Delhi	2021-03-06	20I/501Y.V1	B.1.1.7	GRY	Alpha	VOC
EPI_ISL_1908727	Delhi	2021-03-06	20I/501Y.V1	B.1.1.7	GRY	Alpha	VOC
EPI_ISL_1908728	Delhi	2021-03-07	20I/501Y.V1	B.1.1.7	GRY	Alpha	VOC
EPI_ISL_1908729	Delhi	2021-03-07	20I/501Y.V1	B.1.1.7	GRY	Alpha	VOC
EPI_ISL_1914581	Chhattisgarh	2021-03-03	20A	B.1.36.29	GH	Others	NA
EPI_ISL_1914584	Chhattisgarh	2021-03-04	21A	B.1.617.2	G	Delta	VOC
EPI_ISL_1914595	Chhattisgarh	2021-03-30	21A	B.1.617.2	G	Delta	VOC
EPI_ISL_1916305	Maharashtra	2021-01-02	20A	B.1.36.29	GH	Others	NA
EPI_ISL_1916306	Maharashtra	2021-01-07	20A	B.1.453	G	Others	NA
EPI_ISL_1916312	Maharashtra	2020-12-02	20A	B.1.36	GH	Others	NA
EPI_ISL_1916313	Maharashtra	2020-12-06	20A	B.1.569	G	Others	NA
EPI_ISL_1939850	Tamil_Nadu	2021-03-21	20I/501Y.V1	B.1.1.7	GR	Alpha	VOC
EPI_ISL_1939851	Tamil_Nadu	2021-03-21	20I/501Y.V1	B.1.1.7	GR	Alpha	VOC
EPI_ISL_1939852	Tamil_Nadu	2021-03-21	20I/501Y.V1	B.1.1.7	GR	Alpha	VOC
EPI_ISL_1939853	Tamil_Nadu	2021-03-21	20I/501Y.V1	B.1.1.7	GR	Alpha	VOC
EPI_ISL_1939854	Tamil_Nadu	2021-03-21	20I/501Y.V1	B.1.1.7	GR	Alpha	VOC
EPI_ISL_1939855	Tamil_Nadu	2021-03-21	20I/501Y.V1	B.1.1.7	GR	Alpha	VOC
EPI_ISL_1939856	Tamil_Nadu	2021-03-21	20I/501Y.V1	B.1.1.7	GR	Alpha	VOC
EPI_ISL_1939857	Tamil_Nadu	2021-03-04	20I/501Y.V1	B.1.1.7	GR	Alpha	VOC
EPI_ISL_1939858	Tamil_Nadu	2021-03-04	20I/501Y.V1	B.1.1.7	GR	Alpha	VOC
EPI_ISL_1939859	Tamil_Nadu	2021-03-22	20I/501Y.V1	B.1.1.7	GR	Alpha	VOC
EPI_ISL_1939860	Tamil_Nadu	2021-03-22	20I/501Y.V1	B.1.1.7	GR	Alpha	VOC
EPI_ISL_1939861	Tamil_Nadu	2021-03-20	20I/501Y.V1	B.1.1.7	GR	Alpha	VOC
EPI_ISL_1939862	Tamil_Nadu	2021-03-20	20I/501Y.V1	B.1.1.7	GR	Alpha	VOC
EPI_ISL_1939863	Puducherry	2021-03-26	20I/501Y.V1	B.1.1.7	GR	Alpha	VOC
EPI_ISL_1939864	Puducherry	2021-03-10	20H/501Y.V2	B.1.351	GH	Beta	VOC
EPI_ISL_1939865	Puducherry	2021-03-23	20I/501Y.V1	B.1.1.7	GR	Alpha	VOC
EPI_ISL_1939866	Puducherry	2021-03-24	20I/501Y.V1	B.1.1.7	GR	Alpha	VOC
EPI_ISL_1939867	Puducherry	2021-03-26	20I/501Y.V1	B.1.1.7	GR	Alpha	VOC
EPI_ISL_1939868	Puducherry	2021-03-27	20A	B.1.36.29	GH	Others	NA
EPI_ISL_1939869	Puducherry	2021-03-22	20I/501Y.V1	B.1.1.7	GR	Alpha	VOC
EPI_ISL_1939870	Puducherry	2021-03-14	20I/501Y.V1	B.1.1.7	GR	Alpha	VOC
EPI_ISL_1939871	Puducherry	2021-03-24	20I/501Y.V1	B.1.1.7	GR	Alpha	VOC
EPI_ISL_1939872	Puducherry	2021-03-20	20B	B.1.1.354	GR	Others	NA
EPI_ISL_1939873	Puducherry	2021-03-25	20I/501Y.V1	B.1.1.7	GR	Alpha	VOC
EPI_ISL_1939874	Puducherry	2021-03-09	20I/501Y.V1	B.1.1.7	GR	Alpha	VOC
EPI_ISL_1939875	Maharashtra	2021-03-22	20B	B.1.1.306	GR	Others	NA
EPI_ISL_1939876	Maharashtra	2021-03-22	20B	B.1.1.306	GR	Others	NA
EPI_ISL_1939877	Maharashtra	2021-03-22	20B	B.1.1.306	GR	Others	NA
EPI_ISL_1939878	Maharashtra	2021-03-22	21A	B.1.617.1	G	Kappa	VOI
EPI_ISL_1939880	Maharashtra	2021-03-22	21A	B.1.617.1	G	Kappa	VOI
EPI_ISL_1939881	Maharashtra	2021-03-22	21A	B.1.617.1	G	Kappa	VOI
EPI_ISL_1939882	Maharashtra	2021-03-22	21A	B.1.617.1	G	Kappa	VOI
EPI_ISL_1939883	Maharashtra	2021-03-22	21A	B.1.617.1	G	Kappa	VOI
EPI_ISL_1939887	Maharashtra	2021-03-22	21A	B.1.617.1	G	Kappa	VOI
EPI_ISL_1939888	Maharashtra	2021-03-22	21A	B.1.617.1	G	Kappa	VOI
EPI_ISL_1939889	Maharashtra	2021-03-22	21A	B.1.393	G	Others	NA
EPI_ISL_1939891	Maharashtra	2021-03-22	21A	B.1.617.3	G	Others	NA
EPI_ISL_1939892	Maharashtra	2021-03-22	21A	B.1.617.1	G	Kappa	VOI
EPI_ISL_1939893	Maharashtra	2021-03-22	21A	B.1.617.1	G	Kappa	VOI
EPI_ISL_1939894	Maharashtra	2021-03-22	20A	B.1.36	GH	Others	NA
EPI_ISL_1939895	Maharashtra	2021-03-22	20A	B.1.36	GH	Others	NA
EPI_ISL_1939896	Maharashtra	2021-03-22	20A	B.1	G	Others	NA
EPI_ISL_1939897	Maharashtra	2021-03-22	20B	B.1.1.306	GR	Others	NA
EPI_ISL_1939898	Maharashtra	2021-03-22	20A	B.1.36.17	GH	Others	NA
EPI_ISL_1939899	Maharashtra	2021-03-22	20A	B.1	G	Others	NA
EPI_ISL_2017750	Gujarat	2021-04-03	21A	B.1.617.1	G	Kappa	VOI
EPI_ISL_2017751	Gujarat	2021-04-03	20A	B.1	G	Others	NA
EPI_ISL_2017752	Gujarat	2021-04-02	20B	B.1.1	GR	Others	NA
EPI_ISL_2017753	Gujarat	2021-04-02	20B	B.1.1	GR	Others	NA
EPI_ISL_2017754	Gujarat	2021-04-06	21A	B.1.617.1	G	Kappa	VOI
EPI_ISL_2017755	Gujarat	2021-04-06	21A	B.1.617.1	G	Kappa	VOI
EPI_ISL_2017756	Gujarat	2021-04-06	20A	B.1.36	GH	Others	NA
EPI_ISL_2017757	Gujarat	2021-04-07	21A	B.1.617.2	G	Delta	VOC
EPI_ISL_2017758	Gujarat	2021-04-07	21A	B.1.1	G	Others	NA
EPI_ISL_2017759	Gujarat	2021-04-13	20B	B.1.1	GR	Others	NA
EPI_ISL_2017760	Gujarat	2021-04-13	20B	B.1.1	GR	Others	NA
EPI_ISL_2017761	Gujarat	2021-04-14	21A	B.1.617.2	G	Delta	VOC
EPI_ISL_2017762	Gujarat	2021-04-14	21A	B.1.617.2	G	Delta	VOC
EPI_ISL_2017763	Gujarat	2021-04-02	21A	B.1.617.2	G	Delta	VOC
EPI_ISL_2017764	Gujarat	2021-04-02	21A	B.1.617.2	G	Delta	VOC
EPI_ISL_2017765	Gujarat	2021-04-19	21A	B.1.617.2	G	Delta	VOC
EPI_ISL_2017766	Gujarat	2021-04-20	21A	B.1.617.2	G	Delta	VOC
EPI_ISL_2017767	Gujarat	2021-04-19	21A	B.1.617.2	G	Delta	VOC
EPI_ISL_2017768	Gujarat	2021-04-20	21A	B.1.617.2	G	Delta	VOC
EPI_ISL_2017769	Gujarat	2021-04-20	21A	B.1.617.2	G	Delta	VOC
EPI_ISL_2017783	Gujarat	2021-04-22	21A	B.1.617.2	G	Delta	VOC
EPI_ISL_2017784	Gujarat	2021-04-22	21A	B.1.617.2	G	Delta	VOC
EPI_ISL_2017785	Gujarat	2021-04-22	21A	B.1.617.2	G	Delta	VOC
EPI_ISL_2017786	Gujarat	2021-04-22	21A	B.1.617.2	G	Delta	VOC
EPI_ISL_2017787	Gujarat	2021-04-22	21A	B.1.617.2	G	Delta	VOC
EPI_ISL_2017788	Gujarat	2021-04-23	21A	B.1.617.2	G	Delta	VOC
EPI_ISL_2017789	Gujarat	2021-04-23	21A	B.1.617.2	G	Delta	VOC
EPI_ISL_2020930	Gujarat	2021-04-10	21A	B.1.617.2	G	Delta	VOC
EPI_ISL_2020931	Gujarat	2021-04-10	21A	B.1.617.2	G	Delta	VOC
EPI_ISL_2020932	Gujarat	2021-04-10	21A	B.1.617.2	G	Delta	VOC
EPI_ISL_2020933	Gujarat	2021-04-10	21A	B.1.617.2	G	Delta	VOC
EPI_ISL_2020945	Gujarat	2021-04-10	21A	B.1.617.2	G	Delta	VOC
EPI_ISL_2020946	Gujarat	2021-04-10	21A	B.1.617.2	G	Delta	VOC
EPI_ISL_2020947	Gujarat	2021-04-10	21A	B.1.617.2	G	Delta	VOC
EPI_ISL_2020948	Gujarat	2021-04-10	21A	B.1.617.2	G	Delta	VOC
EPI_ISL_2020949	Gujarat	2021-04-10	21A	B.1.153	G	Others	NA
EPI_ISL_2020952	Gujarat	2021-04-10	21A	B.1.617.2	G	Delta	VOC
EPI_ISL_2020953	Gujarat	2021-04-10	21A	B.1.617.2	G	Delta	VOC
EPI_ISL_2020956	Gujarat	2021-04-10	21A	B.1.153	G	Others	NA
EPI_ISL_2020957	Gujarat	2021-04-10	21A	B.1.617.2	G	Delta	VOC
EPI_ISL_2020958	Gujarat	2021-04-10	21A	B.1.153	G	Others	NA
EPI_ISL_2020959	Gujarat	2021-04-11	21A	B.1.617.2	G	Delta	VOC
EPI_ISL_2020960	Gujarat	2021-04-11	21A	B.1.153	G	Others	NA
EPI_ISL_2098715	Chhattisgarh	2021-04-01	21A	B.1.617.2	G	Delta	VOC
EPI_ISL_2098721	Chhattisgarh	2021-04-02	21A	B.1.617.2	G	Delta	VOC
EPI_ISL_2098722	Chhattisgarh	2021-03-31	21A	B.1.617.2	G	Delta	VOC
EPI_ISL_2099600	Himachal_Pradesh	2020-12-04	20A	B.1.36	GH	Others	NA
EPI_ISL_2099601	Himachal_Pradesh	2020-12-04	20A	B.1.36.8	GH	Others	NA
EPI_ISL_2099602	Himachal_Pradesh	2020-12-05	20A	B.1.36	GH	Others	NA
EPI_ISL_2099603	Himachal_Pradesh	2020-12-05	20A	B.1.36	GH	Others	NA
EPI_ISL_2099604	Himachal_Pradesh	2020-12-05	20A	B.1.36	GH	Others	NA
EPI_ISL_2099605	Himachal_Pradesh	2020-12-05	20A	B.1.36	GH	Others	NA
EPI_ISL_2099606	Himachal_Pradesh	2020-11-24	20A	B.1.36	GH	Others	NA
EPI_ISL_2099607	Himachal_Pradesh	2020-11-23	20A	B.1.36	GH	Others	NA
EPI_ISL_2099608	Himachal_Pradesh	2020-11-24	20A	B.1.36	GH	Others	NA
EPI_ISL_2099609	Himachal_Pradesh	2020-11-24	20B	B.1.1.216	GR	Others	NA
EPI_ISL_2099611	Himachal_Pradesh	2020-11-25	20A	B.1.36	GH	Others	NA
EPI_ISL_2099612	Himachal_Pradesh	2020-11-25	20A	B.1.36	GH	Others	NA
EPI_ISL_2099613	Himachal_Pradesh	2020-11-25	20A	B.1.36	GH	Others	NA
EPI_ISL_2099614	Himachal_Pradesh	2020-11-26	20A	B.1.36	GH	Others	NA
EPI_ISL_2099615	Himachal_Pradesh	2020-11-26	20B	B.1.1	GR	Others	NA
EPI_ISL_2099616	Himachal_Pradesh	2020-11-25	20A	B.1.36.8	GH	Others	NA
EPI_ISL_2099617	Himachal_Pradesh	2020-11-25	20A	B.1.36	GH	Others	NA
EPI_ISL_2099618	Himachal_Pradesh	2020-11-26	20A	B.1.36	GH	Others	NA
EPI_ISL_2099621	Himachal_Pradesh	2020-11-26	20B	B.1.1	GR	Others	NA
EPI_ISL_2099622	Himachal_Pradesh	2020-11-26	20A	B.1.36	GH	Others	NA
EPI_ISL_2099623	Himachal_Pradesh	2020-11-26	20B	B.1.1.216	GR	Others	NA
EPI_ISL_2099624	Himachal_Pradesh	2020-12-01	20A	B.1.36	GH	Others	NA
EPI_ISL_2099625	Himachal_Pradesh	2020-12-02	20A	B.1.36	GH	Others	NA
EPI_ISL_2099641	Himachal_Pradesh	2020-12-05	20B	B.1.1.216	GR	Others	NA
EPI_ISL_2099642	Himachal_Pradesh	2020-12-05	20A	B.1.540	G	Others	NA
EPI_ISL_2099643	Himachal_Pradesh	2020-12-09	20B	B.1.1	GR	Others	NA
EPI_ISL_2099645	Himachal_Pradesh	2020-12-14	20A	B.1.36	GH	Others	NA
EPI_ISL_2099647	Himachal_Pradesh	2020-12-14	20B	B.1.1.216	GR	Others	NA
EPI_ISL_2107059	Maharashtra	2021-03-24	21A	B.1.617.1	G	Kappa	VOI
EPI_ISL_2131572	Maharashtra	2021-05-04	21A	B.1.617.2	G	Delta	VOC
EPI_ISL_2151161	Karnataka	2021	20I/501Y.V1	B.1.1.7	GR	Alpha	VOC
EPI_ISL_2151164	Karnataka	2021	21A	B.1.459	G	Others	NA
EPI_ISL_2151180	Karnataka	2021	21A	B.1.617.2	G	Delta	VOC
EPI_ISL_2151181	Karnataka	2021	21A	B.1.617.2	G	Delta	VOC
EPI_ISL_2151182	Karnataka	2021	21A	B.1.617.1	G	Kappa	VOI
EPI_ISL_2151185	Karnataka	2021	21A	B.1.617.2	G	Delta	VOC
EPI_ISL_2151191	Karnataka	2021	21A	B.1.617.2	G	Delta	VOC
EPI_ISL_2151194	Karnataka	2021	21A	B.1.617.2	G	Delta	VOC
EPI_ISL_2151196	Karnataka	2021	21A	B.1.617.1	G	Kappa	VOI
EPI_ISL_2151197	Karnataka	2021	21A	B.1.617.2	G	Delta	VOC
EPI_ISL_2151198	Karnataka	2021	21A	B.1.617.2	G	Delta	VOC
EPI_ISL_2151199	Karnataka	2021	21A	B.1.617.2	G	Delta	VOC
EPI_ISL_2156850	Telangana	2021-04-13	21A	B.1.617.2	G	Delta	VOC
EPI_ISL_2156851	Telangana	2021-04-13	21A	B.1.617.2	G	Delta	VOC
EPI_ISL_2156852	Telangana	2021-04-13	21A	B.1.617.2	G	Delta	VOC
EPI_ISL_2156854	Telangana	2021-04-13	21A	B.1.617.1	G	Kappa	VOI
EPI_ISL_2156855	Telangana	2021-04-13	21A	B.1.617.1	G	Kappa	VOI
EPI_ISL_2156856	Telangana	2021-04-13	21A	B.1.617.2	G	Delta	VOC
EPI_ISL_2156870	Telangana	2021-04-14	21A	B.1.617.2	G	Delta	VOC
EPI_ISL_2156871	Telangana	2021-04-14	21A	B.1.393	G	Others	NA
EPI_ISL_2156872	Telangana	2021-04-14	21A	B.1.393	G	Others	NA
EPI_ISL_2156873	Telangana	2021-04-14	21A	B.1.393	G	Others	NA
EPI_ISL_2156874	Telangana	2021-04-14	21A	B.1.617.2	G	Delta	VOC
[truncated: 9,865 more rows]
