# Supplementary material for: Circulation and Evolution of SARS-CoV-2 in India: Let the Data Speak
Source: Viruses. 2021 Nov 8;13(11):2238. doi: 10.3390/v13112238 (PMC8619538; doi:10.3390/v13112238)
Supplement: Supplementary file 1 [file viruses-13-02238-s001.zip › Supplementary file 4.xlsx]

## Sheet: Dataset_3
Accession ID	Isolation state	Collection Date	Nextclade	Pangolin	GISAID	WHO	VOI/VOC
EPI_ISL_1192077	Andhra Pradesh	2020-06	20B	B.1.1.46	GR	Others	NA
EPI_ISL_1192078	Andhra Pradesh	2020-06	20B	B.1.1.46	GR	Others	NA
EPI_ISL_1192079	Himachal Pradesh	2020-08	20A	B.1.36	GH	Others	NA
EPI_ISL_1372007	Odisha	2020-12-21	20A	B.1	G	Others	NA
EPI_ISL_1380415	Telangana	2020-12-19	20A	B.1.36.29	GH	Others	NA
EPI_ISL_1380416	Telangana	2020-12-19	20B	B.1.1	GR	Others	NA
EPI_ISL_1380418	Telangana	2020-12-19	20A	B.1.36.29	GH	Others	NA
EPI_ISL_1380419	Telangana	2020-12-19	20A	B.1.36.29	GH	Others	NA
EPI_ISL_1380424	Telangana	2020-12-19	20A	B.1.36.29	GH	Others	NA
EPI_ISL_1380425	Telangana	2020-12-19	20A	B.1	G	Others	NA
EPI_ISL_1380426	Telangana	2020-12-20	20A	B.1.36.29	GH	Others	NA
EPI_ISL_1380429	Telangana	2020-12-20	20A	B.1.36.29	GH	Others	NA
EPI_ISL_1380430	Telangana	2020-12-20	20B	B.1.1.216	GR	Others	NA
EPI_ISL_1380433	Telangana	2020-12-20	20A	B.1.36.29	GH	Others	NA
EPI_ISL_1380435	Telangana	2020-12-20	20A	B.1.36.29	GH	Others	NA
EPI_ISL_1380436	Telangana	2020-12-20	20B	B.1.1	GR	Others	NA
EPI_ISL_1380437	Telangana	2020-12-20	20A	B.1.36.29	GH	Others	NA
EPI_ISL_1380439	Telangana	2020-12-22	20A	B.1.36.29	GH	Others	NA
EPI_ISL_1380441	Telangana	2020-12-22	20A	B.1.36.29	GH	Others	NA
EPI_ISL_1380442	Telangana	2020-12-22	20A	B.1.36.29	GH	Others	NA
EPI_ISL_1380443	Telangana	2020-12-22	20A	B.1.36.29	GH	Others	NA
EPI_ISL_1380444	Telangana	2020-12-22	20A	B.1	G	Others	NA
EPI_ISL_1380445	Telangana	2020-12-22	20B	B.1.1	GR	Others	NA
EPI_ISL_1380447	Telangana	2020-12-22	20B	B.1.1.216	GR	Others	NA
EPI_ISL_1380448	Telangana	2020-12-22	20B	B.1.1.216	GR	Others	NA
EPI_ISL_1380452	Telangana	2020-12-22	20A	B.1.36.29	GH	Others	NA
EPI_ISL_1380453	Telangana	2020-12-22	20B	B.1.1.216	GR	Others	NA
EPI_ISL_1380454	Telangana	2020-12-22	20B	B.1.1.216	GR	Others	NA
EPI_ISL_1380456	Telangana	2020-12-22	20A	B.1.36.29	GH	Others	NA
EPI_ISL_1380457	Telangana	2020-12-22	20B	B.1.1	GR	Others	NA
EPI_ISL_1380458	Telangana	2020-12-22	20A	B.1.36.29	GH	Others	NA
EPI_ISL_1380459	Telangana	2020-12-23	20A	B.1.36.29	GH	Others	NA
EPI_ISL_1380460	Telangana	2020-12-23	20A	B.1.36.29	GH	Others	NA
EPI_ISL_1380461	Telangana	2020-12-23	20A	B.1.36.29	GH	Others	NA
EPI_ISL_1380462	Telangana	2020-12-23	20A	B.1.36.29	GH	Others	NA
EPI_ISL_1380464	Telangana	2020-12-24	20A	B.1.36.29	GH	Others	NA
EPI_ISL_1380465	Telangana	2020-12-24	20A	B.1.36.29	GH	Others	NA
EPI_ISL_1380466	Telangana	2020-12-24	20A	B.1.36.29	GH	Others	NA
EPI_ISL_1380468	Telangana	2020-12-24	20A	B.1.36.29	GH	Others	NA
EPI_ISL_1380469	Telangana	2020-12-25	20A	B.1.36.29	GH	Others	NA
EPI_ISL_1380472	Telangana	2020-12-25	20B	B.1.1.216	GR	Others	NA
EPI_ISL_1380476	Telangana	2020-12-25	20A	B.1.36.29	GH	Others	NA
EPI_ISL_1380479	Telangana	2020-12-25	20A	B.1.36.29	GH	Others	NA
EPI_ISL_1380480	Telangana	2020-12-25	20A	B.1.36.29	GH	Others	NA
EPI_ISL_1380481	Telangana	2020-12-25	20B	B.1.1.326	GR	Others	NA
EPI_ISL_1380483	Telangana	2020-12-25	20A	B.1.36.29	GH	Others	NA
EPI_ISL_1380486	Telangana	2020-12-25	20B	B.1	GR	Others	NA
EPI_ISL_1380487	Telangana	2020-12-26	20A	B.1.36.29	GH	Others	NA
EPI_ISL_1380488	Telangana	2020-12-26	20A	B.1.36.29	GH	Others	NA
EPI_ISL_1380489	Telangana	2020-12-26	20A	B.1.36.29	GH	Others	NA
EPI_ISL_1380491	Andhra Pradesh	2020-12-29	20A	B.1.36.29	GH	Others	NA
EPI_ISL_1380498	Telangana	2020-12-30	20A	B.1.36.29	GH	Others	NA
EPI_ISL_1419200	West Bengal	2020-09-03	20B	B.1.1	GR	Others	NA
EPI_ISL_1419201	West Bengal	2020-09-02	20A	B.1.540	G	Others	NA
EPI_ISL_1419205	West Bengal	2021-01-10	20B	B.1.1.416	GR	Others	NA
EPI_ISL_1419206	West Bengal	2021-01-11	20A	B.1.36.8	GH	Others	NA
EPI_ISL_1419207	West Bengal	2021-01-11	20B	B.1.1	GR	Others	NA
EPI_ISL_1419208	West Bengal	2021-01-12	20A	B.1.36	GH	Others	NA
EPI_ISL_1419209	West Bengal	2021-01-12	20B	B.1.1.216	GR	Others	NA
EPI_ISL_1419211	West Bengal	2021-01-12	20B	B.1.1	GR	Others	NA
EPI_ISL_1419212	West Bengal	2021-01-14	20A	B.1.36	GH	Others	NA
EPI_ISL_1419213	West Bengal	2021-01-15	20B	B.1.1	GR	Others	NA
EPI_ISL_1419215	West Bengal	2021-01-16	20B	B.1.1	GR	Others	NA
EPI_ISL_1419216	West Bengal	2021-01-16	20B	B.1.1	GR	Others	NA
EPI_ISL_1419217	West Bengal	2021-01-22	20B	B.1.1	GR	Others	NA
EPI_ISL_1419218	West Bengal	2021-01-25	20A	B.1.36	GH	Others	NA
EPI_ISL_1419222	West Bengal	2021-01-02	20A	B.1	G	Others	NA
EPI_ISL_1419224	West Bengal	2021-01-02	20B	B.1.1	GR	Others	NA
EPI_ISL_1419226	West Bengal	2020-12-17	20B	B.1.1	GR	Others	NA
EPI_ISL_1419227	West Bengal	2020-12-16	20B	B.1.1.216	GR	Others	NA
EPI_ISL_1708371	Karnataka	2020-09-27	20B	B.1.1.194	GR	Others	NA
EPI_ISL_1708375	Karnataka	2020-09-28	20B	B.1.1.46	GR	Others	NA
EPI_ISL_1708377	Karnataka	2020-09-28	20B	B.1.1	GR	Others	NA
EPI_ISL_1708400	Karnataka	2020-10-08	20B	B.1.1.291	GR	Others	NA
EPI_ISL_1708402	Karnataka	2020-10-10	20B	B.1.1	GR	Others	NA
EPI_ISL_1708404	Karnataka	2020-10-13	20A	B.1.36.29	GH	Others	NA
EPI_ISL_1708405	Karnataka	2020-10-13	20B	B.1.1	GR	Others	NA
EPI_ISL_1708406	Karnataka	2020-10-13	20B	B.1.1.46	GR	Others	NA
EPI_ISL_1708407	Karnataka	2020-10-13	20A	B.1.36.29	GH	Others	NA
EPI_ISL_1708408	Karnataka	2020-10-13	20A	B.1.36.29	GH	Others	NA
EPI_ISL_1708409	Karnataka	2020-10-15	20A	B.1.36.29	GH	Others	NA
EPI_ISL_1708410	Karnataka	2020-10-17	20A	B.1.36.29	GH	Others	NA
EPI_ISL_1708411	Karnataka	2020-10-20	20B	B.1.1.46	GR	Others	NA
EPI_ISL_1708412	Karnataka	2020-10-20	20B	B.1.1	GR	Others	NA
EPI_ISL_1708414	Karnataka	2020-10-28	20A	B.1.36.29	GH	Others	NA
EPI_ISL_1708415	Karnataka	2020-10-29	20A	B.1.36.29	GH	Others	NA
EPI_ISL_1708416	Karnataka	2020-11-01	20B	B.1.1	GR	Others	NA
EPI_ISL_1708418	Karnataka	2020-11-03	20B	B.1.1	GR	Others	NA
EPI_ISL_1708420	Karnataka	2020-11-04	20B	B.1.1	GR	Others	NA
EPI_ISL_1708422	Karnataka	2020-11-05	20B	B.1.1.306	GR	Others	NA
EPI_ISL_1708424	Karnataka	2020-11-08	20A	B.1.36.29	GH	Others	NA
EPI_ISL_1708425	Karnataka	2020-11-08	20A	B.1.36.29	GH	Others	NA
EPI_ISL_1708426	Karnataka	2020-11-09	20B	B.1.1	GR	Others	NA
EPI_ISL_1708427	Karnataka	2020-11-09	20B	B.1.1.46	GR	Others	NA
EPI_ISL_1708428	Karnataka	2020-11-12	20A	B.1.36.29	GH	Others	NA
EPI_ISL_1708429	Karnataka	2020-11-18	20A	B.1.36.29	GH	Others	NA
EPI_ISL_1708430	Karnataka	2020-11-18	20A	B.1.36.29	GH	Others	NA
EPI_ISL_1708431	Karnataka	2020-12-02	20A	B.1.404	G	Others	NA
EPI_ISL_1708432	Karnataka	2020-12-05	20A	B.1.36.29	GH	Others	NA
EPI_ISL_1708433	Karnataka	2020-12-06	20A	B.1.36.29	GH	Others	NA
EPI_ISL_1708434	Karnataka	2020-12-09	20A	B.1.36	GH	Others	NA
EPI_ISL_1708435	Karnataka	2020-12-10	20A	B.1.36.29	GH	Others	NA
EPI_ISL_1708440	Karnataka	2020-12-14	20A	B.1.36.29	GH	Others	NA
EPI_ISL_1708443	Karnataka	2020-12-15	20B	B.1.1.194	GR	Others	NA
EPI_ISL_1708444	Karnataka	2020-12-19	20A	B.1.36.29	GH	Others	NA
EPI_ISL_1708446	Andhra Pradesh	2020-12-28	20A	B.1.36.39	GH	Others	NA
EPI_ISL_1708448	Karnataka	2020-12-31	20B	B.1.1.354	GR	Others	NA
EPI_ISL_1708449	Tamil Nadu	2021-01-01	20A	B.1.36.29	GH	Others	NA
EPI_ISL_1708451	Tamil Nadu	2021-01-01	20B	B.1.1.354	GR	Others	NA
EPI_ISL_1708453	Tamil Nadu	2021-01-01	20B	B.1.1.354	GR	Others	NA
EPI_ISL_1708454	Tamil Nadu	2021-01-01	20A	B.1.36.29	GH	Others	NA
EPI_ISL_1708455	Tamil Nadu	2021-01-01	20A	B.1.36.29	GH	Others	NA
EPI_ISL_1708456	Tamil Nadu	2021-01-01	20B	R.1	GR	Others	NA
EPI_ISL_1708457	Tamil Nadu	2021-01-01	20A	B.1.524	G	Others	NA
EPI_ISL_1708459	Tamil Nadu	2021-01-01	20A	B.1.36.29	GH	Others	NA
EPI_ISL_1708462	Andhra Pradesh	2021-01-05	20A	B.1.36.29	GH	Others	NA
EPI_ISL_1708465	Tamil Nadu	2021-01-20	20I/501Y.V1	B.1.1.7	GR	Alpha	VOC
EPI_ISL_1708466	Tamil Nadu	2021-01-20	20I/501Y.V1	B.1.1.7	GR	Alpha	VOC
EPI_ISL_1708467	Tamil Nadu	2021-01-20	20I/501Y.V1	B.1.1.7	GR	Alpha	VOC
EPI_ISL_1708468	Tamil Nadu	2021-01-20	20I/501Y.V1	B.1.1.7	GR	Alpha	VOC
EPI_ISL_508453	West Bengal	2020-05-24	20A	B.1	G	Others	NA
EPI_ISL_508454	West Bengal	2020-05-24	20A	B.1.36	GH	Others	NA
EPI_ISL_508456	West Bengal	2020-05-24	20A	B.1.210	G	Others	NA
EPI_ISL_508457	West Bengal	2020-05-28	20A	B.1	G	Others	NA
EPI_ISL_508460	West Bengal	2020-05-25	20B	B.1.1.306	GR	Others	NA
EPI_ISL_508463	West Bengal	2020-05-26	20B	B.1.1.306	GR	Others	NA
EPI_ISL_508464	West Bengal	2020-05-20	20B	B.1.1.306	GR	Others	NA
EPI_ISL_508465	West Bengal	2020-05-20	20B	B.1.1.306	GR	Others	NA
EPI_ISL_508468	West Bengal	2020-05-26	20A	B.1.210	G	Others	NA
EPI_ISL_508469	West Bengal	2020-05-20	20B	B.1.1.306	GR	Others	NA
EPI_ISL_508471	West Bengal	2020-05-26	20B	B.1.1.306	GR	Others	NA
EPI_ISL_508475	West Bengal	2020-05-26	20A	B.1.210	G	Others	NA
EPI_ISL_508482	West Bengal	2020-06-02	20A	B.1.210	G	Others	NA
EPI_ISL_508483	West Bengal	2020-06-03	20A	B.1	G	Others	NA
EPI_ISL_508487	West Bengal	2020-06-10	20A	B.1.540	G	Others	NA
EPI_ISL_508489	Haryana	2020-06-12	20A	B.1.36	GH	Others	NA
EPI_ISL_508490	Haryana	2020-06-17	20B	B.1.1.216	GR	Others	NA
EPI_ISL_508491	Haryana	2020-06-17	20A	B.1.36	GH	Others	NA
EPI_ISL_508492	Haryana	2020-06-17	20A	B.1.36	GH	Others	NA
EPI_ISL_508493	Haryana	2020-06-17	20A	B.1.36	GH	Others	NA
EPI_ISL_508495	Delhi	2020-06-17	20A	B.1.36	GH	Others	NA
EPI_ISL_508496	Haryana	2020-06-14	20A	B.1.36	GH	Others	NA
EPI_ISL_508497	Haryana	2020-06-17	20A	B.1.36	GH	Others	NA
EPI_ISL_508498	Haryana	2020-06-19	19A	B.6	O	Others	NA
EPI_ISL_508499	Haryana	2020-06-19	20A	B.1.36	GH	Others	NA
EPI_ISL_539617	Telangana	2020-08-14	20B	B.1.1.326	GR	Others	NA
EPI_ISL_700204	Maharashtra	2020-08-29	20B	B.1.1.216	GR	Others	NA
EPI_ISL_700205	Maharashtra	2020-08-29	20B	B.1.1.306	GR	Others	NA
EPI_ISL_857395	NS	2021-01-11	20A	B.1.36	GH	Others	NA
EPI_ISL_910031	Telangana	2020-08-26	20B	B.1.1.326	GR	Others	NA
EPI_ISL_910033	Telangana	2020-08-26	20B	B.1.1.216	GR	Others	NA
EPI_ISL_910034	Telangana	2020-08-26	20B	B.1.1.306	GR	Others	NA
EPI_ISL_910035	Telangana	2020-08-26	20B	B.1.1.306	GR	Others	NA
EPI_ISL_910036	Telangana	2020-08-26	20C	B.1.369	GH	Others	NA
EPI_ISL_910037	Telangana	2020-08-27	20B	B.1.1.326	GR	Others	NA
EPI_ISL_910038	Telangana	2020-08-27	20B	B.1.1.326	GR	Others	NA
EPI_ISL_910039	Telangana	2020-08-27	20B	B.1.1.326	GR	Others	NA
EPI_ISL_910040	Telangana	2020-08-27	20B	B.1.1.326	GR	Others	NA
EPI_ISL_910041	Telangana	2020-08-27	20B	B.1.1.306	GR	Others	NA
EPI_ISL_910042	Telangana	2020-08-26	20B	B.1.1.326	GR	Others	NA
EPI_ISL_910043	Telangana	2020-08-27	20B	B.1.1.306	GR	Others	NA
EPI_ISL_910044	Telangana	2020-08-27	20B	B.1.1.326	GR	Others	NA
EPI_ISL_910047	Telangana	2020-08-27	20A	B.1.36.8	GH	Others	NA
EPI_ISL_910048	Telangana	2020-08-27	20B	B.1.1.306	GR	Others	NA
EPI_ISL_1192080	Andhra Pradesh	2020-08	20A	B.1.36.29	GH	Others	NA
EPI_ISL_1192081	Andhra Pradesh	2020-08	20A	B.1.36.29	GH	Others	NA
EPI_ISL_1192082	Andhra Pradesh	2020-06	20A	B.1.36.29	GH	Others	NA
EPI_ISL_1192083	Andhra Pradesh	2020-06	20A	B.1.36.29	GH	Others	NA
EPI_ISL_1192084	Andhra Pradesh	2020-08	20A	B.1.36.29	GH	Others	NA
EPI_ISL_1192085	Telangana	2020-05	20A	B.1.36.29	GH	Others	NA
EPI_ISL_1192086	Telangana	2020-07	20A	B.1.548	GH	Others	NA
EPI_ISL_1192087	Telangana	2020-07	20A	B.1.36.29	GH	Others	NA
EPI_ISL_1192089	Telangana	2020-08	20A	B.1.36.29	GH	Others	NA
EPI_ISL_1192090	Telangana	2020-09	20A	B.1.36.29	GH	Others	NA
EPI_ISL_1192091	Telangana	2020-04	20B	B.1.1.326	GR	Others	NA
EPI_ISL_1192092	Himachal Pradesh	2020-08	20A	B.1.36	GH	Others	NA
EPI_ISL_1192093	Andhra Pradesh	2020-08	20B	B.1.1	GR	Others	NA
EPI_ISL_1192094	Andhra Pradesh	2020-06	20B	B.1.1.306	GR	Others	NA
EPI_ISL_1192095	Andhra Pradesh	2020	20A	B.1	G	Others	NA
EPI_ISL_1192096	Telangana	2020-04	20B	B.1.1.326	GR	Others	NA
EPI_ISL_1192097	Telangana	2020-07	20A	B.1	GH	Others	NA
EPI_ISL_1192098	Himachal Pradesh	2020-08	20B	B.1.1	GR	Others	NA
EPI_ISL_1192099	Himachal Pradesh	2020-08	20B	B.1.1	GR	Others	NA
EPI_ISL_1380403	Telangana	2020-12-15	20A	B.1.36.29	GH	Others	NA
EPI_ISL_1380404	Telangana	2020-12-15	20A	B.1.36.29	GH	Others	NA
EPI_ISL_1380405	Telangana	2020-12-15	20B	B.1.1.306	GR	Others	NA
EPI_ISL_1380406	Telangana	2020-12-15	20A	B.1.36.29	GH	Others	NA
EPI_ISL_1380407	Telangana	2020-12-15	20A	B.1.36.29	GH	Others	NA
EPI_ISL_1380409	Telangana	2020-12-17	20A	B.1.36.29	GH	Others	NA
EPI_ISL_1380414	Telangana	2020-12-17	20A	B.1	G	Others	NA
EPI_ISL_1380423	Telangana	2020-12-19	20A	B.1.36.29	GH	Others	NA
EPI_ISL_1419230	West Bengal	2020-12-01	20B	B.1.1	GR	Others	NA
EPI_ISL_1419232	West Bengal	2020-12-01	20A	B.1.36	GH	Others	NA
EPI_ISL_1419234	West Bengal	2021-02-01	20B	B.1.1.216	GR	Others	NA
EPI_ISL_1419236	West Bengal	2020-12-17	20B	B.1.1.25	GR	Others	NA
EPI_ISL_1419239	West Bengal	2020-12-17	20A	B.1	GV	Others	NA
EPI_ISL_1419240	West Bengal	2020-12-18	20B	B.1.1	GR	Others	NA
EPI_ISL_1419243	West Bengal	2020-12-01	20A	B.1.36	GH	Others	NA
EPI_ISL_1419246	West Bengal	2020-12-01	20A	B.1.2	G	Others	NA
EPI_ISL_1419247	West Bengal	2020-12-13	20B	B.1.1.216	GR	Others	NA
EPI_ISL_1419248	West Bengal	2020-12-13	20B	B.1.1	GR	Others	NA
EPI_ISL_1419249	West Bengal	2020-12-12	20B	B.1.1.216	GR	Others	NA
EPI_ISL_1419260	West Bengal	2020-09-29	20A	B.1	G	Others	NA
EPI_ISL_1419261	West Bengal	2020-10-01	20A	B.1	G	Others	NA
EPI_ISL_1419262	West Bengal	2020-10-01	20B	B.1.1.216	GR	Others	NA
EPI_ISL_1419263	West Bengal	2020-10-01	20A	B.1	G	Others	NA
EPI_ISL_1419264	West Bengal	2020-10-01	20B	B.1.1	GR	Others	NA
EPI_ISL_1419265	West Bengal	2020-10-01	20B	B.1.1	GR	Others	NA
EPI_ISL_1419266	West Bengal	2020-10-01	20A	B.1.540	G	Others	NA
EPI_ISL_1419269	West Bengal	2020-10-01	20A	B.1	G	Others	NA
EPI_ISL_1543996	Maharashtra	2021-02-23	20B	B.1.1.306	GR	Others	NA
EPI_ISL_1543999	Maharashtra	2021-02-24	20A	B.1.36.29	GH	Others	NA
EPI_ISL_1708351	Karnataka	2020-09-17	20B	B.1.1	GR	Others	NA
EPI_ISL_1708353	Karnataka	2020-09-20	20B	B.1.1	GR	Others	NA
EPI_ISL_1708355	Karnataka	2020-09-21	20B	B.1.1	GR	Others	NA
EPI_ISL_1708356	Karnataka	2020-09-21	20B	B.1.1	GR	Others	NA
EPI_ISL_1708357	Karnataka	2020-09-22	20B	B.1.1	GR	Others	NA
EPI_ISL_1708358	Karnataka	2020-09-23	20B	B.1.1.326	GR	Others	NA
EPI_ISL_1708359	Karnataka	2020-09-24	20B	B.1.1	GR	Others	NA
EPI_ISL_1708360	Karnataka	2020-09-24	20A	B.1.36.29	GH	Others	NA
EPI_ISL_1708361	Karnataka	2020-09-24	20A	B.1.36.29	GH	Others	NA
EPI_ISL_1708362	Karnataka	2020-09-26	20B	B.1.1	GR	Others	NA
EPI_ISL_1708363	Karnataka	2020-09-26	20B	B.1.1.46	GR	Others	NA
EPI_ISL_1708365	Karnataka	2020-09-27	20A	B.1.36	GH	Others	NA
EPI_ISL_1708367	Karnataka	2020-09-27	20B	B.1.1.46	GR	Others	NA
EPI_ISL_1708368	Karnataka	2020-09-27	20B	B.1	GR	Others	NA
EPI_ISL_1708383	Karnataka	2020-10-03	20A	B.1.36	GH	Others	NA
EPI_ISL_1708384	Karnataka	2020-10-03	20B	B.1.1	GR	Others	NA
EPI_ISL_1708385	Karnataka	2020-10-03	20B	B.1.1.231	GR	Others	NA
EPI_ISL_1708386	Karnataka	2020-10-05	20B	B.1.1	GR	Others	NA
EPI_ISL_1708388	Karnataka	2020-10-06	20A	B.1.36.29	GH	Others	NA
EPI_ISL_1708389	Karnataka	2020-10-06	20B	B.1.1.46	GR	Others	NA
EPI_ISL_1708390	Karnataka	2020-10-06	20B	B.1.1	GR	Others	NA
EPI_ISL_1708392	Karnataka	2020-10-06	20B	B.1.1.46	GR	Others	NA
EPI_ISL_1708393	Karnataka	2020-10-07	20B	B.1.1.46	GR	Others	NA
EPI_ISL_1708394	Karnataka	2020-10-07	20B	B.1.1	GR	Others	NA
EPI_ISL_1708396	Karnataka	2020-10-08	20B	B.1.1.194	GR	Others	NA
EPI_ISL_1708397	Karnataka	2020-10-08	20B	B.1.1.194	GR	Others	NA
EPI_ISL_1708398	Karnataka	2020-10-08	20B	B.1.1.354	GR	Others	NA
EPI_ISL_413522	Maharashtra	2020-01-27	19A	B	L	Others	NA
EPI_ISL_413523	Maharashtra	2020-01-31	19B	B	S	Others	NA
EPI_ISL_539618	Telangana	2020-08-16	20B	B.1.1.326	GR	Others	NA
EPI_ISL_539619	Telangana	2020-08-19	20B	B.1.1.326	GR	Others	NA
EPI_ISL_539620	Telangana	2020-08-09	20B	B.1.1.326	GR	Others	NA
EPI_ISL_539621	Telangana	2020-08-09	20B	B.1.1.326	GR	Others	NA
EPI_ISL_539622	Telangana	2020-08-09	20B	B.1.1.326	GR	Others	NA
EPI_ISL_539624	Telangana	2020-08-09	20B	B.1.1.326	GR	Others	NA
EPI_ISL_539625	Telangana	2020-08-09	20B	B.1.1.326	GR	Others	NA
EPI_ISL_539627	Telangana	2020-08-14	20B	B.1.1.326	GR	Others	NA
EPI_ISL_539629	Telangana	2020-08-14	20B	B.1.1.326	GR	Others	NA
EPI_ISL_539633	Telangana	2020-08-12	20B	B.1.1.326	GR	Others	NA
EPI_ISL_539636	Telangana	2020-08-13	20B	B.1.1.326	GR	Others	NA
EPI_ISL_539639	Telangana	2020-08-15	20B	B.1.1.326	GR	Others	NA
EPI_ISL_539640	Telangana	2020-08-14	20B	B.1.1.326	GR	Others	NA
EPI_ISL_539641	Telangana	2020-08-12	20B	B.1.1.326	GR	Others	NA
EPI_ISL_539642	Telangana	2020-08-19	20B	B.1.1.326	GR	Others	NA
EPI_ISL_539643	Telangana	2020-08-09	20B	B.1.1.326	GR	Others	NA
EPI_ISL_539645	Telangana	2020-08-10	20B	B.1.1.326	GR	Others	NA
EPI_ISL_539649	Telangana	2020-08-12	20B	B.1.1.326	GR	Others	NA
EPI_ISL_700207	Maharashtra	2020-08-31	20B	B.1.1.306	GR	Others	NA
EPI_ISL_700208	Maharashtra	2020-08-31	20A	B.1.210	G	Others	NA
EPI_ISL_700212	Maharashtra	2020-08-31	20B	B.1.1.306	GR	Others	NA
EPI_ISL_700214	Maharashtra	2020-08-31	20B	B.1.1.306	GR	Others	NA
EPI_ISL_700215	Maharashtra	2020-08-31	20B	B.1.1.306	GR	Others	NA
EPI_ISL_700224	Maharashtra	2020-09-02	20B	B.1.1.306	GR	Others	NA
EPI_ISL_700225	Maharashtra	2020-09-03	20B	B.1.1.306	GR	Others	NA
EPI_ISL_700238	Maharashtra	2020-09-08	20B	B.1.1.306	GR	Others	NA
EPI_ISL_700239	Maharashtra	2020-09-08	20A	B.1	GH	Others	NA
EPI_ISL_700241	Maharashtra	2020-09-08	20A	B.1.36	GH	Others	NA
EPI_ISL_700250	Maharashtra	2020-09-09	20B	B.1.1.306	GR	Others	NA
EPI_ISL_700254	Maharashtra	2020-09-10	20B	B.1.1.306	GR	Others	NA
EPI_ISL_700255	Maharashtra	2020-09-11	20A	B.1.210	G	Others	NA
EPI_ISL_700257	Maharashtra	2020-09-11	20B	B.1.1.306	GR	Others	NA
EPI_ISL_700262	Maharashtra	2020-09-11	20B	B.1.1.306	GR	Others	NA
EPI_ISL_700264	Maharashtra	2020-09-11	20A	B.1	G	Others	NA
EPI_ISL_700269	Maharashtra	2020-09-12	20A	B.1.210	G	Others	NA
EPI_ISL_700271	Maharashtra	2020-09-13	20A	B.1.210	G	Others	NA
EPI_ISL_700275	Maharashtra	2020-09-14	20A	B.1.36	GH	Others	NA
EPI_ISL_700280	Maharashtra	2020-09-14	20B	B.1.1.306	GR	Others	NA
EPI_ISL_700284	Maharashtra	2020-09-14	20B	B.1.1.306	GR	Others	NA
EPI_ISL_700298	Maharashtra	2020-09-18	20B	B.1.1.306	GR	Others	NA
EPI_ISL_700299	Maharashtra	2020-09-18	20A	B.1.36	GH	Others	NA
EPI_ISL_1061417	NS	2020-03-10	19A	B.4	O	Others	NA
EPI_ISL_1419250	West Bengal	2021-02-02	20A	B.1.618	G	Others	NA
EPI_ISL_1419254	West Bengal	2020-11-04	20A	B.1	G	Others	NA
EPI_ISL_1419257	West Bengal	2020-09-30	20A	B.1.36	GH	Others	NA
EPI_ISL_1419258	West Bengal	2020-09-30	20A	B.1	G	Others	NA
EPI_ISL_1419259	West Bengal	2020-09-30	20B	B.1.1.306	GR	Others	NA
EPI_ISL_1419271	West Bengal	2020-10-01	20A	B.1.36	GH	Others	NA
EPI_ISL_1419272	West Bengal	2020-10-20	20B	B.1.1.25	GR	Others	NA
EPI_ISL_1419273	West Bengal	2020-10-20	20B	B.1.1	GR	Others	NA
EPI_ISL_1419274	West Bengal	2020-10-20	20A	B.1	G	Others	NA
EPI_ISL_1419277	West Bengal	2020-10-20	20A	B.1	G	Others	NA
EPI_ISL_1419280	West Bengal	2020-10-20	20A	B.1	G	Others	NA
EPI_ISL_1419281	West Bengal	2020-10-20	20A	B.1	G	Others	NA
EPI_ISL_1419282	West Bengal	2020-10-21	20A	B.1.1	G	Others	NA
EPI_ISL_1419283	West Bengal	2020-10-21	20A	B.1.1	G	Others	NA
EPI_ISL_1419285	West Bengal	2020-10-21	20B	B.1.1.216	GR	Others	NA
EPI_ISL_1419287	West Bengal	2020-10-21	20A	B.1.36	GH	Others	NA
EPI_ISL_1419288	West Bengal	2020-10-21	20A	B.1.36.18	GH	Others	NA
EPI_ISL_1419290	West Bengal	2020-10-26	20B	B.1.1.25	GR	Others	NA
EPI_ISL_1419294	West Bengal	2020-11-05	20A	B.1.540	G	Others	NA
EPI_ISL_1419298	West Bengal	2021-02-13	20B	B.1.1.25	GR	Others	NA
EPI_ISL_1419300	West Bengal	2020-09-02	20B	B.1.1.216	GR	Others	NA
EPI_ISL_1419301	West Bengal	2020-09-02	20A	B.1	G	Others	NA
EPI_ISL_1419321	West Bengal	2020-09-03	20A	B.1.36	GH	Others	NA
EPI_ISL_1419322	West Bengal	2020-09-03	20A	B.1	G	Others	NA
EPI_ISL_1419323	West Bengal	2020-09-03	20A	B.1	G	Others	NA
EPI_ISL_1419325	West Bengal	2020-09-03	20A	B.1.36	GH	Others	NA
EPI_ISL_1419326	West Bengal	2020-09-03	20A	B.1.36	GH	Others	NA
EPI_ISL_1419327	West Bengal	2020-09-03	20A	B.1.36	GH	Others	NA
EPI_ISL_1419329	West Bengal	2020-09-03	20A	B.1.540	G	Others	NA
EPI_ISL_508350	West Bengal	2020-04-25	20A	B.1	G	Others	NA
EPI_ISL_508352	West Bengal	2020-04-25	19A	B.6	O	Others	NA
EPI_ISL_508353	West Bengal	2020-04-25	20A	B.1	G	Others	NA
EPI_ISL_508354	West Bengal	2020-04-25	20A	B.1	G	Others	NA
EPI_ISL_508355	West Bengal	2020-04-25	19B	A.9	S	Others	NA
EPI_ISL_508357	West Bengal	2020-04-27	20A	B.1	G	Others	NA
EPI_ISL_508358	West Bengal	2020-04-27	20A	B.1.540	G	Others	NA
EPI_ISL_508359	West Bengal	2020-04-28	20A	B.1.540	G	Others	NA
EPI_ISL_508362	West Bengal	2020-05-01	20A	B.1	G	Others	NA
EPI_ISL_508363	West Bengal	2020-05-01	20A	B.1	G	Others	NA
EPI_ISL_508365	West Bengal	2020-05-02	20A	B.1.540	G	Others	NA
EPI_ISL_508370	West Bengal	2020-05-04	20A	B.1	G	Others	NA
EPI_ISL_508371	West Bengal	2020-05-04	20A	B.1	G	Others	NA
EPI_ISL_508372	West Bengal	2020-05-04	20A	B.1	G	Others	NA
EPI_ISL_508374	West Bengal	2020-05-04	20A	B.1	G	Others	NA
EPI_ISL_508375	West Bengal	2020-05-04	20A	B.1	G	Others	NA
EPI_ISL_508376	West Bengal	2020-03-31	20A	B.1	G	Others	NA
EPI_ISL_508377	West Bengal	2020-05-05	20A	B.1	G	Others	NA
EPI_ISL_508378	West Bengal	2020-05-05	20A	B.1	G	Others	NA
EPI_ISL_508379	West Bengal	2020-05-06	20A	B.1.540	G	Others	NA
EPI_ISL_508381	West Bengal	2020-05-06	20A	B.1	G	Others	NA
EPI_ISL_508382	West Bengal	2020-05-07	19B	A.9	S	Others	NA
EPI_ISL_508383	West Bengal	2020-05-07	20A	B.1	G	Others	NA
EPI_ISL_508384	West Bengal	2020-05-07	20A	B.1	G	Others	NA
EPI_ISL_508385	West Bengal	2020-04-03	19B	A.9	S	Others	NA
EPI_ISL_508386	West Bengal	2020-05-07	19B	A.9	S	Others	NA
EPI_ISL_508387	West Bengal	2020-05-09	20A	B.1	G	Others	NA
EPI_ISL_508388	West Bengal	2020-05-12	20A	B.1	G	Others	NA
EPI_ISL_508389	West Bengal	2020-05-12	20A	B.1.540	G	Others	NA
EPI_ISL_508391	West Bengal	2020-05-12	20A	B.1	G	Others	NA
EPI_ISL_508392	West Bengal	2020-05-14	20A	B.1	G	Others	NA
EPI_ISL_508394	West Bengal	2020-04-03	19B	A.9	S	Others	NA
EPI_ISL_508395	West Bengal	2020-05-14	20A	B.1	G	Others	NA
EPI_ISL_508396	West Bengal	2020-05-14	20A	B.1	G	Others	NA
EPI_ISL_508397	West Bengal	2020-05-14	20A	B.1	G	Others	NA
EPI_ISL_508398	West Bengal	2020-05-19	20A	B.1	G	Others	NA
EPI_ISL_508399	West Bengal	2020-05-19	20A	B.1	G	Others	NA
EPI_ISL_508502	Haryana	2020-06-14	20B	B.1.1.306	GR	Others	NA
EPI_ISL_508503	Haryana	2020-06-22	20A	B.1.36	GH	Others	NA
EPI_ISL_508505	Haryana	2020-06-14	20A	B.1.36	GH	Others	NA
EPI_ISL_508506	Haryana	2020-05-12	20A	B.1.36	GH	Others	NA
EPI_ISL_508507	Haryana	2020-06-14	20A	B.1.36	GH	Others	NA
EPI_ISL_539650	Telangana	2020-08-12	20B	B.1.1.326	GR	Others	NA
EPI_ISL_539653	Telangana	2020-08-13	20B	B.1.1.326	GR	Others	NA
EPI_ISL_539655	Telangana	2020-08-12	20B	B.1.1.326	GR	Others	NA
EPI_ISL_539656	Telangana	2020-08-15	20B	B.1.1.326	GR	Others	NA
EPI_ISL_539658	Telangana	2020-08-19	20B	B.1.1.326	GR	Others	NA
EPI_ISL_539659	Telangana	2020-08-19	20B	B.1.1.326	GR	Others	NA
EPI_ISL_539663	Telangana	2020-08-11	20B	B.1.1.326	GR	Others	NA
EPI_ISL_539666	Telangana	2020-08-13	20B	B.1.1.326	GR	Others	NA
EPI_ISL_539667	Telangana	2020-08-10	20B	B.1.1.354	GR	Others	NA
EPI_ISL_539668	Telangana	2020-08-10	20B	B.1.1.354	GR	Others	NA
EPI_ISL_539669	Telangana	2020-08-13	20B	B.1.1	GR	Others	NA
EPI_ISL_539670	Telangana	2020-08-12	20B	B.1.1.326	GR	Others	NA
EPI_ISL_539671	Telangana	2020-08-13	20B	B.1.1.326	GR	Others	NA
EPI_ISL_539673	Telangana	2020-08-19	20B	B.1.1.326	GR	Others	NA
EPI_ISL_539674	Telangana	2020-08-13	20B	B.1.1.326	GR	Others	NA
EPI_ISL_539675	Telangana	2020-08-16	20B	B.1.1.326	GR	Others	NA
EPI_ISL_539677	Telangana	2020-08-10	20B	B.1.1.326	GR	Others	NA
EPI_ISL_539678	Telangana	2020-08-13	20B	B.1.1.326	GR	Others	NA
EPI_ISL_539679	Telangana	2020-08-09	20B	B.1.1.326	GR	Others	NA
EPI_ISL_539680	Telangana	2020-08-10	20B	B.1.1.326	GR	Others	NA
EPI_ISL_539682	Telangana	2020-08-14	20B	B.1.1.326	GR	Others	NA
EPI_ISL_539683	Telangana	2020-08-10	20B	B.1.1.306	GR	Others	NA
EPI_ISL_539686	Telangana	2020-08-12	20B	B.1.1.306	GR	Others	NA
EPI_ISL_539693	Telangana	2020-08-13	20B	B.1.1.306	GR	Others	NA
EPI_ISL_539694	Telangana	2020-08-11	20B	B.1.1.306	GR	Others	NA
EPI_ISL_539695	Telangana	2020-08-13	20B	B.1.1.306	GR	Others	NA
EPI_ISL_700290	Maharashtra	2020-09-15	20B	B.1.1.306	GR	Others	NA
EPI_ISL_700292	Maharashtra	2020-09-16	20A	B.1	G	Others	NA
EPI_ISL_910100	Telangana	2020-08-30	20B	B.1.1.326	GR	Others	NA
EPI_ISL_910101	Telangana	2020-08-30	20B	B.1.1.326	GR	Others	NA
EPI_ISL_910103	Telangana	2020-08-30	20B	B.1.1.326	GR	Others	NA
EPI_ISL_910104	Telangana	2020-08-30	20A	B.1.36.8	GH	Others	NA
EPI_ISL_910106	Telangana	2020-08-30	20A	B.1.36.29	GH	Others	NA
EPI_ISL_910107	Telangana	2020-08-30	20B	B.1.1.326	GR	Others	NA
EPI_ISL_910134	Telangana	2020-09-08	20B	B.1.1.306	GR	Others	NA
EPI_ISL_910142	Telangana	2020-09-08	20B	B.1.1.326	GR	Others	NA
EPI_ISL_910144	Telangana	2020-09-08	20B	B.1.1.326	GR	Others	NA
EPI_ISL_910145	Telangana	2020-09-09	20B	B.1.1.326	GR	Others	NA
EPI_ISL_910146	Telangana	2020-09-09	20B	B.1.1.326	GR	Others	NA
EPI_ISL_910147	Telangana	2020-09-09	20A	B.1.36.29	GH	Others	NA
EPI_ISL_910148	Telangana	2020-09-09	20B	B.1.1.306	GR	Others	NA
EPI_ISL_910149	Telangana	2020-09-09	20B	B.1.1.326	GR	Others	NA
EPI_ISL_910150	Telangana	2020-09-09	20B	B.1.1.326	GR	Others	NA
EPI_ISL_910151	Telangana	2020-09-09	20B	B.1.1.326	GR	Others	NA
EPI_ISL_910153	Telangana	2020-09-09	20A	B.1.36.29	GH	Others	NA
EPI_ISL_910154	Telangana	2020-09-09	20A	B.1.36.29	GH	Others	NA
EPI_ISL_910155	Telangana	2020-09-09	20B	B.1.1.326	GR	Others	NA
EPI_ISL_910156	Telangana	2020-09-09	20B	B.1.1.326	GR	Others	NA
EPI_ISL_910157	Telangana	2020-09-09	20B	B.1.1	GR	Others	NA
EPI_ISL_910159	Telangana	2020-09-09	20B	B.1.1.306	GR	Others	NA
EPI_ISL_910160	Telangana	2020-09-09	20B	B.1.1.306	GR	Others	NA
EPI_ISL_910161	Telangana	2020-09-10	20B	B.1.1.306	GR	Others	NA
EPI_ISL_910162	Telangana	2020-09-10	20B	B.1.1.326	GR	Others	NA
EPI_ISL_910164	Telangana	2020-09-10	20B	B.1.1.326	GR	Others	NA
EPI_ISL_910165	Telangana	2020-09-10	20B	B.1.1.326	GR	Others	NA
EPI_ISL_910166	Telangana	2020-09-10	20B	B.1.1.326	GR	Others	NA
EPI_ISL_910167	Telangana	2020-09-10	20B	B.1.1.326	GR	Others	NA
EPI_ISL_910168	Telangana	2020-09-11	20A	B.1.36.29	GH	Others	NA
EPI_ISL_910169	Telangana	2020-09-11	20B	B.1.1.326	GR	Others	NA
EPI_ISL_1055768	Maharashtra	2020-03-19	20B	B.1.1	GR	Others	NA
EPI_ISL_1380338	Telangana	2020-12-08	20A	B.1.36.29	GH	Others	NA
EPI_ISL_1380339	Telangana	2020-12-08	20B	B.1.1	GR	Others	NA
EPI_ISL_1380340	Telangana	2020-12-08	20A	B.1.36.29	GH	Others	NA
EPI_ISL_1380341	Telangana	2020-12-08	20A	B.1.36.29	GH	Others	NA
EPI_ISL_1380342	Telangana	2020-12-08	20A	B.1.36.29	GH	Others	NA
EPI_ISL_1380343	Telangana	2020-12-09	20B	B.1.1.306	GR	Others	NA
EPI_ISL_1380346	Telangana	2020-12-09	20A	B.1.36.29	GH	Others	NA
EPI_ISL_1380347	Telangana	2020-12-09	20A	B.1.36.29	GH	Others	NA
EPI_ISL_1380348	Telangana	2020-12-09	20A	B.1.36.29	GH	Others	NA
EPI_ISL_1380349	Telangana	2020-12-09	20A	B.1.36.29	GH	Others	NA
EPI_ISL_1380350	Telangana	2020-12-09	20A	B.1.36.29	GH	Others	NA
EPI_ISL_1380351	Telangana	2020-12-09	20A	B.1.36.29	GH	Others	NA
EPI_ISL_1380352	Telangana	2020-12-09	20A	B.1.36.29	GH	Others	NA
EPI_ISL_1380353	Telangana	2020-12-09	20A	B.1.36.29	GH	Others	NA
EPI_ISL_1380354	Telangana	2020-12-10	20A	B.1.36.29	GH	Others	NA
EPI_ISL_1380355	Telangana	2020-12-10	20A	B.1.36.29	GH	Others	NA
EPI_ISL_1380356	Telangana	2020-12-10	20B	B.1.1	GR	Others	NA
EPI_ISL_1380357	Telangana	2020-12-10	20A	B.1.36.29	GH	Others	NA
EPI_ISL_1380359	Telangana	2020-12-10	20B	B.1.1.306	GR	Others	NA
EPI_ISL_1380360	Telangana	2020-12-10	20A	B.1.36.29	GH	Others	NA
EPI_ISL_1380361	Telangana	2020-12-10	20A	B.1.36.29	GH	Others	NA
EPI_ISL_1380362	Telangana	2020-12-10	20B	B.1.1.326	GR	Others	NA
EPI_ISL_1380363	Telangana	2020-12-10	20B	B.1.1.326	GR	Others	NA
EPI_ISL_1380364	Telangana	2020-12-10	20A	B.1.36.29	GH	Others	NA
EPI_ISL_1380367	Telangana	2020-12-10	20B	B.1.1.101	GR	Others	NA
EPI_ISL_1380368	Telangana	2020-12-10	20A	B.1.36.29	GH	Others	NA
EPI_ISL_1380369	Telangana	2020-12-10	20A	B.1.36.29	GH	Others	NA
EPI_ISL_1380370	Telangana	2020-12-10	20B	B.1.1	GR	Others	NA
EPI_ISL_1380371	Telangana	2020-12-11	20A	B.1.36.29	GH	Others	NA
EPI_ISL_1380372	Telangana	2020-12-11	20A	B.1.36.29	GH	Others	NA
EPI_ISL_1380373	Telangana	2020-12-11	20A	B.1.36.29	GH	Others	NA
EPI_ISL_1380374	Telangana	2020-12-11	20A	B.1.36.29	GH	Others	NA
EPI_ISL_1380375	Telangana	2020-12-11	20A	B.1.36.29	GH	Others	NA
EPI_ISL_1380376	Telangana	2020-12-11	20A	B.1.36.29	GH	Others	NA
EPI_ISL_1380379	Telangana	2020-12-11	20A	B.1.36.29	GH	Others	NA
EPI_ISL_1380383	Telangana	2020-12-12	20A	B.1.36.29	GH	Others	NA
EPI_ISL_1380387	Telangana	2020-12-12	20A	B.1.36.29	GH	Others	NA
EPI_ISL_1380388	Telangana	2020-12-12	20A	B.1.36.29	GH	Others	NA
EPI_ISL_1380391	Telangana	2020-12-13	20A	B.1.36.29	GH	Others	NA
EPI_ISL_1380393	Telangana	2020-12-13	20A	B.1.36.29	GH	Others	NA
EPI_ISL_1380394	Telangana	2020-12-13	20B	B.1.1.216	GR	Others	NA
EPI_ISL_1419310	West Bengal	2020-09-02	20A	B.1.540	G	Others	NA
EPI_ISL_1419312	West Bengal	2020-09-03	20A	B.1	G	Others	NA
EPI_ISL_1419314	West Bengal	2020-09-02	20A	B.1.36	GH	Others	NA
EPI_ISL_1419318	West Bengal	2020-09-03	20A	B.1.577	G	Others	NA
EPI_ISL_1419319	West Bengal	2020-09-03	20B	B.1.1	GR	Others	NA
EPI_ISL_1419331	West Bengal	2020-09-03	20A	B.1.36	GH	Others	NA
EPI_ISL_1419334	West Bengal	2020-09-03	20A	B.1	G	Others	NA
EPI_ISL_1419336	West Bengal	2020-09-03	20A	B.1.36	GH	Others	NA
EPI_ISL_1419339	West Bengal	2020-09-03	20A	B.1.540	G	Others	NA
EPI_ISL_1419342	West Bengal	2020-09-03	20A	B.1.36	GH	Others	NA
EPI_ISL_1419343	West Bengal	2020-09-03	20A	B.1.540	G	Others	NA
EPI_ISL_1419346	West Bengal	2020-09-03	20A	B.1.36	GH	Others	NA
EPI_ISL_1662410	Chhattisgarh	2021-02-15	20A	B.1.617.1	G	Kappa	VOI
EPI_ISL_1662411	Chhattisgarh	2021-02-15	20A	B.1.36	GH	Others	NA
EPI_ISL_1662412	Chhattisgarh	2021-02-17	20A	B.1	G	Others	NA
EPI_ISL_1662413	Chhattisgarh	2021-02-17	20A	B.1	G	Others	NA
EPI_ISL_1662414	Chhattisgarh	2021-02-17	20A	B.1.36	GH	Others	NA
EPI_ISL_1662415	Chhattisgarh	2021-02-18	20A	B.1.36.17	GH	Others	NA
EPI_ISL_1662416	Chhattisgarh	2021-02-18	20A	B.1.560	G	Others	NA
EPI_ISL_1662417	Chhattisgarh	2021-02-20	20B	B.1.560	G	Others	NA
EPI_ISL_1662418	Chhattisgarh	2021-02-22	20A	B.1.36	G	Others	NA
EPI_ISL_1662419	Chhattisgarh	2021-02-22	20A	B.1	G	Others	NA
EPI_ISL_1662420	Chhattisgarh	2021-02-22	20A	B.1.617.1	G	Kappa	VOI
EPI_ISL_1662421	Chhattisgarh	2021-02-22	20A	B.1	G	Others	NA
EPI_ISL_1662422	Odisha	2021-03-24	20A	B.1	G	Others	NA
EPI_ISL_1662423	Odisha	2021-03-24	20A	B.1	G	Others	NA
EPI_ISL_1662424	Odisha	2021-03-25	20I/501Y.V1	B.1	G	Others	NA
EPI_ISL_1662425	Odisha	2021-03-25	20A	B.1	G	Others	NA
EPI_ISL_1662426	Odisha	2021-03-25	20A	B.1	G	Others	NA
EPI_ISL_1662427	Odisha	2021-03-25	20A	B.1.617.1	G	Kappa	VOI
EPI_ISL_1662428	Odisha	2021-03-25	20A	B.1	G	Others	NA
EPI_ISL_1662430	Odisha	2021-03-25	20A	B.1	G	Others	NA
EPI_ISL_1662431	Odisha	2021-03-25	20A	B.1.617.1	G	Kappa	VOI
EPI_ISL_1662432	Odisha	2021-03-25	20A	B.1.36.10	G	Others	NA
EPI_ISL_1662434	Odisha	2021-03-25	20I/501Y.V1	B.1	G	Others	NA
EPI_ISL_1662435	Odisha	2021-03-25	20A	B.1	G	Others	NA
EPI_ISL_1662436	Odisha	2021-03-25	20A	B.1.222	G	Others	NA
EPI_ISL_1662437	Odisha	2021-03-25	20A	B.1	G	Others	NA
EPI_ISL_1662439	Odisha	2021-03-25	20A	B.1	G	Others	NA
EPI_ISL_1662441	Odisha	2021-03-25	20A	B.1	G	Others	NA
EPI_ISL_1662442	Odisha	2021-03-25	20A	B.1	G	Others	NA
EPI_ISL_1662443	Odisha	2021-03-25	20A	B.1	G	Others	NA
EPI_ISL_1662444	Odisha	2021-03-26	20A	B.1	G	Others	NA
EPI_ISL_1662445	Odisha	2021-03-18	20A	B.1.222	G	Others	NA
EPI_ISL_1662447	Odisha	2021-03-18	20A	B.1.617.2	G	Delta	VOC
EPI_ISL_1662448	Odisha	2021-03-18	20A	B.1.222	G	Others	NA
EPI_ISL_1662450	Odisha	2021-03-18	20A	B.1	G	Others	NA
EPI_ISL_1662451	Odisha	2021-03-18	20A	B.1.617.2	G	Delta	VOC
EPI_ISL_1662452	Odisha	2021-03-18	20A	B.1	G	Others	NA
EPI_ISL_1662454	Odisha	2021-03-19	20A	B.1	G	Others	NA
EPI_ISL_1662455	Odisha	2021-03-18	20A	B.1	G	Others	NA
EPI_ISL_1662456	Odisha	2021-03-19	20A	B.1	G	Others	NA
EPI_ISL_1662457	Odisha	2021-03-19	20A	B.1	G	Others	NA
EPI_ISL_1662459	Odisha	2021-03-19	20A	B.1.36.10	G	Others	NA
EPI_ISL_1708330	Karnataka	2020-09-05	20B	B.1.1.46	GR	Others	NA
EPI_ISL_1708331	Karnataka	2020-09-06	20B	B.1.1.46	GR	Others	NA
EPI_ISL_1708332	Karnataka	2020-09-06	20B	B.1.1.46	GR	Others	NA
EPI_ISL_1708334	Karnataka	2020-09-08	20B	B.1.1	GR	Others	NA
EPI_ISL_1708335	Karnataka	2020-09-09	20A	B.1.36.29	GH	Others	NA
EPI_ISL_1708336	Karnataka	2020-09-12	20B	B.1.1.46	GR	Others	NA
EPI_ISL_1708337	Karnataka	2020-09-12	20A	B.1.36	GH	Others	NA
EPI_ISL_1708338	Karnataka	2020-09-13	20B	B.1.1	GR	Others	NA
EPI_ISL_1708339	Karnataka	2020-09-13	20A	B.1.36.29	GH	Others	NA
EPI_ISL_1708346	Karnataka	2020-09-15	20B	B.1.1	GR	Others	NA
EPI_ISL_447050	Gujarat	2020-04-29	20A	B.1.36.8	GH	Others	NA
EPI_ISL_447052	Gujarat	2020-05-02	20A	B.1	G	Others	NA
EPI_ISL_447053	Gujarat	2020-04-29	20A	B.1	GH	Others	NA
EPI_ISL_508330	Karnataka	2020-06-03	20A	B.1	G	Others	NA
EPI_ISL_508331	Karnataka	2020-06-20	20B	B.1.1	GR	Others	NA
EPI_ISL_508332	Karnataka	2020-05-27	20A	B.1.36.8	GH	Others	NA
EPI_ISL_508335	Karnataka	2020-06-17	20B	B.1.1.46	GR	Others	NA
EPI_ISL_508336	Karnataka	2020-06-20	20B	B.1.1.46	GR	Others	NA
EPI_ISL_508337	Karnataka	2020-06-19	20B	B.1.1.46	GR	Others	NA
EPI_ISL_508338	West Bengal	2020-03-30	20A	B.1.540	G	Others	NA
EPI_ISL_508339	West Bengal	2020-04-14	20A	B.1	G	Others	NA
EPI_ISL_508340	West Bengal	2020-04-14	20A	B.1	G	Others	NA
EPI_ISL_508341	West Bengal	2020-04-20	20A	B.1	G	Others	NA
EPI_ISL_508342	West Bengal	2020-04-20	20A	B.1	G	Others	NA
EPI_ISL_508343	West Bengal	2020-04-21	20A	B.1.540	G	Others	NA
EPI_ISL_508344	West Bengal	2020-04-21	19B	A.9	S	Others	NA
EPI_ISL_508345	West Bengal	2020-04-24	20A	B.1	G	Others	NA
EPI_ISL_508346	West Bengal	2020-04-24	20A	B.1	G	Others	NA
EPI_ISL_508347	West Bengal	2020-04-24	20A	B.1	G	Others	NA
EPI_ISL_508348	West Bengal	2020-04-24	20A	B.1	G	Others	NA
EPI_ISL_508349	West Bengal	2020-03-30	20A	B.1.540	G	Others	NA
EPI_ISL_508360	West Bengal	2020-04-28	20A	B.1	G	Others	NA
EPI_ISL_508364	West Bengal	2020-05-01	20A	B.1	G	Others	NA
EPI_ISL_508366	West Bengal	2020-05-03	20A	B.1.540	G	Others	NA
EPI_ISL_508367	West Bengal	2020-05-03	20A	B.1	G	Others	NA
EPI_ISL_508369	West Bengal	2020-05-04	20A	B.1	G	Others	NA
EPI_ISL_528809	Andhra Pradesh	2020-05-29	20B	B.1.1.8	GR	Others	NA
EPI_ISL_528812	Telangana	2020-05-24	20B	B.1.1	GR	Others	NA
EPI_ISL_528816	Telangana	2020-05-23	20B	B.1.1.8	GR	Others	NA
EPI_ISL_528821	Telangana	2020-05-23	20A	B.1.210	G	Others	NA
EPI_ISL_528823	Telangana	2020-07-14	20B	B.1.1.326	GR	Others	NA
EPI_ISL_528827	Telangana	2020-07-14	20B	B.1.1.306	GR	Others	NA
EPI_ISL_528828	Telangana	2020-07-14	20B	B.1.1.306	GR	Others	NA
EPI_ISL_528833	Telangana	2020-07-14	20B	B.1.1.326	GR	Others	NA
EPI_ISL_528834	Telangana	2020-07-14	20C	B.1.369	GH	Others	NA
EPI_ISL_528835	Telangana	2020-07-14	20B	B.1.1.326	GR	Others	NA
EPI_ISL_528838	Telangana	2020-07-14	20B	B.1.1.306	GR	Others	NA
EPI_ISL_528839	Telangana	2020-07-14	20B	B.1.1.326	GR	Others	NA
EPI_ISL_528840	Telangana	2020-07-14	20B	B.1.1.306	GR	Others	NA
EPI_ISL_528841	Telangana	2020-07-14	20B	B.1.1.326	GR	Others	NA
EPI_ISL_528842	Telangana	2020-07-15	20B	B.1.1.326	GR	Others	NA
EPI_ISL_528844	Telangana	2020-07-15	20B	B.1.1.340	GR	Others	NA
EPI_ISL_528845	Telangana	2020-07-15	20B	B.1.1.326	GR	Others	NA
EPI_ISL_528846	Telangana	2020-07-15	20B	B.1.1.306	GR	Others	NA
EPI_ISL_528847	Telangana	2020-07-15	20B	B.1.1.326	GR	Others	NA
EPI_ISL_528848	Telangana	2020-07-15	20B	B.1.1.306	GR	Others	NA
EPI_ISL_910109	Telangana	2020-08-30	20B	B.1.1.326	GR	Others	NA
EPI_ISL_910110	Telangana	2020-08-30	20B	B.1.1.326	GR	Others	NA
EPI_ISL_910112	Telangana	2020-09-02	20B	B.1.1.306	GR	Others	NA
EPI_ISL_910116	Telangana	2020-08-31	20B	B.1.1.326	GR	Others	NA
EPI_ISL_910117	Telangana	2020-08-31	20B	B.1.1.326	GR	Others	NA
EPI_ISL_910118	Telangana	2020-08-31	20B	B.1.1.306	GR	Others	NA
EPI_ISL_910120	Telangana	2020-08-31	20A	B.1.36.29	GH	Others	NA
EPI_ISL_910122	Telangana	2020-08-31	20A	B.1.36.8	GH	Others	NA
EPI_ISL_910125	Telangana	2020-09-03	20A	B.1	G	Others	NA
EPI_ISL_910127	Telangana	2020-09-03	20A	B.1.36.29	GH	Others	NA
EPI_ISL_910129	Telangana	2020-09-08	20B	B.1.1.326	GR	Others	NA
EPI_ISL_1055770	Maharashtra	2020-03-28	20A	B.1.210	G	Others	NA
EPI_ISL_1055785	Maharashtra	2020-03-29	20A	B.1.210	G	Others	NA
EPI_ISL_1055788	Maharashtra	2020-04-07	20A	B.1.210	G	Others	NA
EPI_ISL_1055789	Maharashtra	2020-04-15	20A	B.1.210	G	Others	NA
EPI_ISL_1380300	Telangana	2020-11-19	20A	B.1.36.29	GH	Others	NA
EPI_ISL_1380301	Telangana	2020-11-19	20A	B.1.36	GH	Others	NA
EPI_ISL_1380303	Telangana	2020-12-02	20A	B.1.36.29	GH	Others	NA
EPI_ISL_1380305	Telangana	2020-12-02	20A	B.1.36.29	GH	Others	NA
EPI_ISL_1380306	Telangana	2020-12-02	20A	B.1.36.29	GH	Others	NA
EPI_ISL_1380307	Telangana	2020-12-02	20A	B.1.36.29	GH	Others	NA
EPI_ISL_1380318	Telangana	2020-12-05	20A	B.1.36	GH	Others	NA
EPI_ISL_1380320	Telangana	2020-12-05	20A	B.1.36.29	GH	Others	NA
EPI_ISL_1380322	Telangana	2020-12-05	20A	B.1.36.29	GH	Others	NA
EPI_ISL_1380324	Telangana	2020-12-06	20B	B.1.1.326	GR	Others	NA
EPI_ISL_1380325	Telangana	2020-12-06	20A	B.1.36.29	GH	Others	NA
EPI_ISL_1380326	Telangana	2020-12-06	20A	B.1.36.29	GH	Others	NA
EPI_ISL_1380329	Telangana	2020-12-06	20B	B.1.1	GR	Others	NA
EPI_ISL_1380331	Telangana	2020-12-08	20A	B.1.36.29	GH	Others	NA
EPI_ISL_1380332	Telangana	2020-12-08	20A	B.1.36.29	GH	Others	NA
EPI_ISL_1380334	Telangana	2020-12-08	20A	B.1.36.29	GH	Others	NA
EPI_ISL_1419352	West Bengal	2021-02-23	20B	B.1.1.101	GR	Others	NA
EPI_ISL_1419365	West Bengal	2020-10-26	20A	B.1	G	Others	NA
EPI_ISL_1419366	West Bengal	2020-10-26	20B	B.1.1	GR	Others	NA
EPI_ISL_1419369	West Bengal	2020-10-26	20A	B.1	G	Others	NA
EPI_ISL_1419381	West Bengal	2020-10-27	20A	B.1.36	GH	Others	NA
EPI_ISL_1419382	West Bengal	2020-10-27	20B	B.1.1	GR	Others	NA
EPI_ISL_1419383	West Bengal	2020-10-27	20A	B.1.540	G	Others	NA
EPI_ISL_1419384	West Bengal	2020-10-27	20A	B.1.540	G	Others	NA
EPI_ISL_1419386	West Bengal	2020-10-27	20A	B.1	G	Others	NA
EPI_ISL_1662400	Chhattisgarh	2021-02-08	20A	B.1.36.10	G	Others	NA
EPI_ISL_1662401	Chhattisgarh	2021-03-10	20B	B.1.1.216	G	Others	NA
EPI_ISL_1662402	Chhattisgarh	2021-02-10	20A	B.1	G	Others	NA
EPI_ISL_1662403	Chhattisgarh	2021-02-10	20A	B.1	G	Others	NA
EPI_ISL_1662404	Chhattisgarh	2021-02-11	20A	B.1	G	Others	NA
EPI_ISL_1662405	Chhattisgarh	2021-02-11	20A	B.1	GH	Others	NA
EPI_ISL_1662406	Chhattisgarh	2021-02-11	20A	B.1.36.29	GH	Others	NA
EPI_ISL_1662407	Chhattisgarh	2021-02-11	20A	B.1.36.17	GH	Others	NA
EPI_ISL_1662408	Chhattisgarh	2021-02-13	20A	B.1.36	GH	Others	NA
EPI_ISL_1662409	Chhattisgarh	2021-02-15	20A	B.1	G	Others	NA
EPI_ISL_1662460	Odisha	2021-03-19	20A	B.1	G	Others	NA
EPI_ISL_1662461	Odisha	2021-03-19	20A	B.1	G	Others	NA
EPI_ISL_1662462	Odisha	2021-03-19	20A	B.1	G	Others	NA
EPI_ISL_1662463	Odisha	2021-03-19	20A	B.1	G	Others	NA
EPI_ISL_1708322	Karnataka	2021-01-02	20A	B.1.36.29	GH	Others	NA
EPI_ISL_1708323	Karnataka	2021-01-11	20A	B.1.36.29	GH	Others	NA
EPI_ISL_1708324	Karnataka	2021-01-17	20B	B.1.1.46	GR	Others	NA
EPI_ISL_1708325	Karnataka	2021-01-18	20A	B.1.36.29	GH	Others	NA
EPI_ISL_1708327	Karnataka	2021-01-19	20A	B.1.36.29	GH	Others	NA
EPI_ISL_1708328	Karnataka	2021-01-23	20B	B.1.1.306	GR	Others	NA
EPI_ISL_1708329	Karnataka	2020-09-05	20B	B.1.1	GR	Others	NA
EPI_ISL_1708340	Karnataka	2020-09-13	20B	B.1.1.46	GR	Others	NA
EPI_ISL_1708341	Karnataka	2020-09-14	20A	B.1.36	GH	Others	NA
EPI_ISL_1708343	Karnataka	2020-09-15	20B	B.1.1	GR	Others	NA
EPI_ISL_1708344	Karnataka	2020-09-15	20B	B.1.1	GR	Others	NA
EPI_ISL_1708347	Karnataka	2020-09-15	20B	B.1.1.354	GR	Others	NA
EPI_ISL_1708348	Karnataka	2020-09-15	20B	B.1.1.354	GR	Others	NA
EPI_ISL_1710598	Maharashtra	2021-03-04	20A	B.1.36.29	GH	Others	NA
EPI_ISL_424361	NS	2020-03-10	19A	B.4	O	Others	NA
EPI_ISL_424362	NS	2020-03-10	20A	B.1	G	Others	NA
EPI_ISL_424365	NS	2020-03-17	20A	B.1	G	Others	NA
EPI_ISL_435050	Gujarat	2020-04-13	20A	B.1	G	Others	NA
EPI_ISL_435051	Gujarat	2020-04-13	20C	B.1	GH	Others	NA
EPI_ISL_435053	Gujarat	2020-04-07	20A	B.1	G	Others	NA
EPI_ISL_447030	Gujarat	2020-05-03	20A	B.1	G	Others	NA
EPI_ISL_447033	Gujarat	2020-05-03	20A	B.1.36.8	GH	Others	NA
EPI_ISL_447036	Gujarat	2020-05-03	20A	B.1	GH	Others	NA
EPI_ISL_447037	Gujarat	2020-05-03	20A	B.1	GH	Others	NA
EPI_ISL_447038	Gujarat	2020-05-03	20A	B.1	G	Others	NA
EPI_ISL_447039	Gujarat	2020-05-03	20A	B.1.36.8	GH	Others	NA
EPI_ISL_447040	Gujarat	2020-05-03	20A	B.1.36.8	GH	Others	NA
EPI_ISL_447041	Gujarat	2020-05-03	20A	B.1	GH	Others	NA
EPI_ISL_447043	Gujarat	2020-05-03	20A	B.1.36.8	GH	Others	NA
EPI_ISL_447044	Gujarat	2020-05-03	20A	B.1.36.8	GH	Others	NA
EPI_ISL_447045	Gujarat	2020-05-03	20A	B.1.36.8	GH	Others	NA
EPI_ISL_447046	Gujarat	2020-05-04	20A	B.1.36.8	GH	Others	NA
EPI_ISL_447048	Gujarat	2020-04-27	20A	B.1.36.8	GH	Others	NA
EPI_ISL_447049	Gujarat	2020-04-29	20A	B.1.36.8	GH	Others	NA
EPI_ISL_455478	Odisha	2020-04-09	20A	B.1	GH	Others	NA
EPI_ISL_486669	Karnataka	2020	20B	B.1.1.46	GR	Others	NA
EPI_ISL_486670	Karnataka	2020	20B	B.1.1.46	GR	Others	NA
EPI_ISL_508400	West Bengal	2020-05-17	20A	B.1	G	Others	NA
EPI_ISL_508401	West Bengal	2020-05-17	20A	B.1	G	Others	NA
EPI_ISL_508402	West Bengal	2020-05-17	20A	B.1	G	Others	NA
EPI_ISL_508403	West Bengal	2020-05-17	20A	B.1	G	Others	NA
EPI_ISL_508404	West Bengal	2020-05-17	20A	B.1	G	Others	NA
EPI_ISL_508405	West Bengal	2020-05-19	20A	B.1	G	Others	NA
EPI_ISL_508408	West Bengal	2020-05-20	20A	B.1	G	Others	NA
EPI_ISL_508409	West Bengal	2020-05-20	20A	B.1	G	Others	NA
EPI_ISL_508410	West Bengal	2020-05-20	20A	B.1	G	Others	NA
EPI_ISL_508411	West Bengal	2020-05-24	20A	B.1	G	Others	NA
EPI_ISL_508412	West Bengal	2020-05-24	20A	B.1	G	Others	NA
EPI_ISL_508413	West Bengal	2020-05-24	20A	B.1	G	Others	NA
EPI_ISL_508414	West Bengal	2020-05-24	20A	B.1	G	Others	NA
EPI_ISL_508415	Delhi	2020-06-16	20A	B.1.36	GH	Others	NA
EPI_ISL_508416	Delhi	2020-06-18	20B	B.1.1	GR	Others	NA
EPI_ISL_508418	Delhi	2020-06-20	20A	B.1.36	GH	Others	NA
EPI_ISL_508419	Uttar Pradesh	2020-06-27	20A	B.1.36	GH	Others	NA
EPI_ISL_508420	Delhi	2020-06-18	20A	B.1.36	GH	Others	NA
EPI_ISL_508422	Delhi	2020-06-18	20A	B.1.36	GH	Others	NA
EPI_ISL_508423	Maharashtra	2020-04-29	20A	B.1	G	Others	NA
EPI_ISL_508424	Maharashtra	2020-05-01	19A	B.6.6	O	Others	NA
EPI_ISL_508427	Maharashtra	2020-05-15	20B	B.1.1.101	GR	Others	NA
EPI_ISL_508428	Uttar Pradesh	2020-05-17	20A	B.1.210	G	Others	NA
EPI_ISL_508429	Maharashtra	2020-05-21	20B	B.1.1.306	GR	Others	NA
EPI_ISL_508430	Maharashtra	2020-05-21	20B	B.1.1.306	GR	Others	NA
EPI_ISL_508431	Maharashtra	2020-05-23	20B	B.1.1.306	GR	Others	NA
EPI_ISL_508432	Maharashtra	2020-05-23	20B	B.1.1.306	GR	Others	NA
EPI_ISL_508434	Odisha	2020-05-26	19B	A	S	Others	NA
EPI_ISL_508435	Maharashtra	2020-05-25	20B	B.1.1.306	GR	Others	NA
EPI_ISL_508436	Maharashtra	2020-05-29	20B	B.1.1.306	GR	Others	NA
EPI_ISL_508437	Maharashtra	2020-06-04	20A	B.1.36	GH	Others	NA
EPI_ISL_508439	Maharashtra	2020-04-27	19A	B.6	O	Others	NA
EPI_ISL_508444	West Bengal	2020-05-02	20A	B.1	G	Others	NA
EPI_ISL_528849	Telangana	2020-07-15	20B	B.1.1.326	GR	Others	NA
EPI_ISL_528851	Telangana	2020-07-14	20B	B.1.1.340	GR	Others	NA
EPI_ISL_528852	Telangana	2020-07-14	20B	B.1.1.306	GR	Others	NA
EPI_ISL_528853	Telangana	2020-07-14	20B	B.1.1.306	GR	Others	NA
EPI_ISL_528854	Telangana	2020-07-14	20B	B.1.1.306	GR	Others	NA
EPI_ISL_528855	Telangana	2020-07-14	20B	B.1.1.306	GR	Others	NA
EPI_ISL_528858	Telangana	2020-07-14	20B	B.1.1.326	GR	Others	NA
EPI_ISL_528861	Telangana	2020-07-14	20B	B.1.1.340	GR	Others	NA
EPI_ISL_528862	Telangana	2020-07-14	20B	B.1.1.326	GR	Others	NA
EPI_ISL_528863	Telangana	2020-07-14	20B	B.1.1.306	GR	Others	NA
EPI_ISL_528865	Telangana	2020-07-14	20B	B.1.1.326	GR	Others	NA
EPI_ISL_528868	Telangana	2020-07-14	20B	B.1.1.326	GR	Others	NA
EPI_ISL_528869	Telangana	2020-07-14	20B	B.1.1.326	GR	Others	NA
EPI_ISL_700300	Maharashtra	2020-09-18	20B	B.1.1.306	GR	Others	NA
EPI_ISL_700310	Maharashtra	2020-09-22	20B	B.1.1.306	GR	Others	NA
EPI_ISL_700313	Odisha	2020-09-24	20B	B.1.1	GR	Others	NA
EPI_ISL_700315	Maharashtra	2020-09-24	20B	B.1.1.306	GR	Others	NA
EPI_ISL_700319	Maharashtra	2020-09-25	20B	B.1.1.216	GR	Others	NA
EPI_ISL_700321	Maharashtra	2020-09-25	20A	B.1.210	G	Others	NA
EPI_ISL_700322	Maharashtra	2020-09-25	20A	B.1.36.16	GH	Others	NA
EPI_ISL_826274	Gujarat	2020-10-24	20A	B.1.36.8	GH	Others	NA
EPI_ISL_871790	Uttar Pradesh	2020-08-25	20A	B.1.36	GH	Others	NA
EPI_ISL_910053	Telangana	2020-08-27	20A	B.1.36.29	GH	Others	NA
EPI_ISL_910054	Telangana	2020-08-27	20B	B.1.1.306	GR	Others	NA
EPI_ISL_910057	Telangana	2020-08-27	20B	B.1.1.306	GR	Others	NA
EPI_ISL_910058	Telangana	2020-08-27	20B	B.1.1.306	GR	Others	NA
EPI_ISL_910060	Telangana	2020-08-28	20B	B.1.1.306	GR	Others	NA
EPI_ISL_910064	Telangana	2020-08-28	20A	B.1.195	G	Others	NA
EPI_ISL_910065	Telangana	2020-08-28	20B	B.1.1.326	GR	Others	NA
EPI_ISL_910067	Telangana	2020-08-28	20B	B.1.1.306	GR	Others	NA
EPI_ISL_910069	Telangana	2020-08-28	20B	B.1.1.326	GR	Others	NA
EPI_ISL_910088	Telangana	2020-08-29	20B	B.1.1.326	GR	Others	NA
EPI_ISL_910089	Telangana	2020-08-29	20B	B.1.1.326	GR	Others	NA
EPI_ISL_910090	Telangana	2020-08-29	20B	B.1.1.306	GR	Others	NA
EPI_ISL_910091	Telangana	2020-08-29	20B	B.1.1.306	GR	Others	NA
EPI_ISL_910094	Telangana	2020-08-29	20B	B.1.1.326	GR	Others	NA
EPI_ISL_910095	Telangana	2020-08-29	20B	B.1.1.326	GR	Others	NA
EPI_ISL_910097	Telangana	2020-08-30	20B	B.1.1.326	GR	Others	NA
EPI_ISL_910099	Telangana	2020-08-30	20B	B.1.1.306	GR	Others	NA
EPI_ISL_1063890	Odisha	2020-11-03	20B	B.1.1	GR	Others	NA
EPI_ISL_1063891	Odisha	2020-12-24	20B	B.1.1.216	GR	Others	NA
EPI_ISL_1063892	Odisha	2020-12-25	20B	B.1.1.216	GR	Others	NA
EPI_ISL_1063893	Odisha	2020-11-03	20B	B.1.1	GR	Others	NA
EPI_ISL_1063894	Odisha	2020-11-05	20B	B.1.1	GR	Others	NA
EPI_ISL_1063895	Odisha	2020-11-03	20B	B.1.1	GR	Others	NA
EPI_ISL_1063897	Odisha	2020-12-10	20B	B.1.1	GR	Others	NA
EPI_ISL_1063898	Odisha	2020-12-10	20B	B.1.1	GR	Others	NA
EPI_ISL_1380270	Telangana	2020-11-12	20A	B.1.36.29	GH	Others	NA
EPI_ISL_1380271	Telangana	2020-11-12	20A	B.1.36.29	GH	Others	NA
EPI_ISL_1380272	Telangana	2020-11-12	20B	B.1.1	GR	Others	NA
EPI_ISL_1380273	Telangana	2020-11-12	20B	B.1.1.326	GR	Others	NA
EPI_ISL_1380274	Telangana	2020-11-13	20A	B.1.36.29	GH	Others	NA
EPI_ISL_1380279	Telangana	2020-11-13	20B	B.1.1.326	GR	Others	NA
EPI_ISL_1380280	Telangana	2020-11-14	20A	B.1.36.29	GH	Others	NA
EPI_ISL_1380282	Telangana	2020-11-14	20B	B.1.1.326	GR	Others	NA
EPI_ISL_1380285	Telangana	2020-11-17	20B	B.1.1	GR	Others	NA
EPI_ISL_1380286	Telangana	2020-11-17	20A	B.1.36.29	GH	Others	NA
EPI_ISL_1380287	Telangana	2020-11-17	20A	B.1.36	GH	Others	NA
EPI_ISL_1380288	Telangana	2020-11-17	20A	B.1.36.29	GH	Others	NA
EPI_ISL_1380289	Telangana	2020-11-18	20B	B.1.1	GR	Others	NA
EPI_ISL_1380291	Telangana	2020-11-18	20A	B.1.36.29	GH	Others	NA
EPI_ISL_1380292	Telangana	2020-11-18	20A	B.1.36.29	GH	Others	NA
EPI_ISL_1380294	Telangana	2020-11-18	20B	B.1.1.306	GR	Others	NA
EPI_ISL_1380295	Telangana	2020-11-18	20A	B.1.36.29	GH	Others	NA
EPI_ISL_1380296	Telangana	2020-11-18	20A	B.1.36.29	GH	Others	NA
EPI_ISL_1380297	Telangana	2020-11-18	20A	B.1.36.29	GH	Others	NA
EPI_ISL_1380298	Telangana	2020-11-19	20A	B.1.36.29	GH	Others	NA
EPI_ISL_1380299	Telangana	2020-11-19	20B	B.1.1.306	GR	Others	NA
EPI_ISL_1419414	West Bengal	2021-03-10	20I/501Y.V1	B.1.1.7	GRY	Alpha	VOC
EPI_ISL_1419429	West Bengal	2021-01-02	20B	B.1.1	GR	Others	NA
EPI_ISL_1419430	West Bengal	2021-01-29	20B	B.1.1	GR	Others	NA
EPI_ISL_1419431	West Bengal	2021-01-30	20B	B.1.1	GR	Others	NA
EPI_ISL_1419433	West Bengal	2021-01-02	20B	B.1.1	GR	Others	NA
EPI_ISL_1419436	West Bengal	2021-01-27	20A	B.1.36.18	GH	Others	NA
EPI_ISL_1419439	West Bengal	2020-12-18	20A	B.1	G	Others	NA
EPI_ISL_1419440	West Bengal	2020-12-01	20A	B.1.36	GH	Others	NA
EPI_ISL_1419441	West Bengal	2021-01-22	20A	B.1.36	GH	Others	NA
EPI_ISL_1419443	West Bengal	2021-01-23	20A	B.1.36.18	GH	Others	NA
EPI_ISL_1419444	West Bengal	2021-01-21	20A	B.1.618	G	Others	NA
EPI_ISL_1419446	West Bengal	2020-12-31	20B	B.1.1.216	GR	Others	NA
EPI_ISL_1419448	West Bengal	2021-01-19	20B	B.1.1	GR	Others	NA
EPI_ISL_1419451	West Bengal	2021-01-20	20B	B.1.1.216	GR	Others	NA
EPI_ISL_1419457	West Bengal	2021-01-25	20A	B.1.36	GH	Others	NA
EPI_ISL_1419458	West Bengal	2021-01-01	20B	B.1.1	GR	Others	NA
EPI_ISL_1419463	West Bengal	2021-01-25	20B	B.1.1.25	GR	Others	NA
EPI_ISL_1419467	West Bengal	2021-01-28	20B	B.1.1	GR	Others	NA
EPI_ISL_1419468	West Bengal	2021-01-20	20B	B.1.1	GR	Others	NA
EPI_ISL_420543	NS	2020-03-03	20A	B.1	G	Others	NA
EPI_ISL_420553	NS	2020-03-03	20A	B.1	G	Others	NA
EPI_ISL_486398	Karnataka	2020-04-25	19A	B.6	O	Others	NA
EPI_ISL_508211	Maharashtra	2020-06-17	20B	B.1.1.306	GR	Others	NA
EPI_ISL_508212	Maharashtra	2020-06-17	20B	B.1.1.306	GR	Others	NA
EPI_ISL_508214	Maharashtra	2020-06-17	20B	B.1.1.306	GR	Others	NA
EPI_ISL_508215	Maharashtra	2020-06-17	20B	B.1.1.306	GR	Others	NA
EPI_ISL_508216	Maharashtra	2020-06-17	20B	B.1.1.306	GR	Others	NA
EPI_ISL_508217	Maharashtra	2020-06-17	20B	B.1.1.306	GR	Others	NA
EPI_ISL_508221	Maharashtra	2020-06-16	20B	B.1.1.306	GR	Others	NA
EPI_ISL_508223	Maharashtra	2020-06-17	20B	B.1.1.306	GR	Others	NA
EPI_ISL_508224	Maharashtra	2020-06-17	20B	B.1.1.306	GR	Others	NA
EPI_ISL_508225	Maharashtra	2020-06-20	20B	B.1.1.306	GR	Others	NA
EPI_ISL_508226	Maharashtra	2020-06-20	20B	B.1.1.306	GR	Others	NA
EPI_ISL_508227	Maharashtra	2020-06-20	20B	B.1.1.306	GR	Others	NA
EPI_ISL_508228	Maharashtra	2020-06-20	20B	B.1.1.306	GR	Others	NA
EPI_ISL_508229	Maharashtra	2020-06-20	20B	B.1.1.306	GR	Others	NA
EPI_ISL_508233	Maharashtra	2020-06-20	20B	B.1.1.306	GR	Others	NA
EPI_ISL_508234	Maharashtra	2020-06-17	20B	B.1.1.306	GR	Others	NA
EPI_ISL_508236	Maharashtra	2020-06-20	20B	B.1.1.306	GR	Others	NA
EPI_ISL_508237	Maharashtra	2020-06-20	20B	B.1.1.306	GR	Others	NA
EPI_ISL_508238	Maharashtra	2020-06-20	20B	B.1.1.306	GR	Others	NA
EPI_ISL_508239	Maharashtra	2020-06-20	20B	B.1.1.306	GR	Others	NA
EPI_ISL_508241	Maharashtra	2020-06-20	20B	B.1.1.306	GR	Others	NA
EPI_ISL_508242	Maharashtra	2020-06-20	20B	B.1.1.306	GR	Others	NA
EPI_ISL_508243	Maharashtra	2020-06-20	20B	B.1.1.306	GR	Others	NA
EPI_ISL_508245	Maharashtra	2020-06-20	20B	B.1.1.306	GR	Others	NA
EPI_ISL_508247	Maharashtra	2020-06-20	20B	B.1.1.306	GR	Others	NA
EPI_ISL_508248	Maharashtra	2020-06-20	20B	B.1.1.306	GR	Others	NA
EPI_ISL_508250	Maharashtra	2020-06-20	20B	B.1.1.306	GR	Others	NA
EPI_ISL_508251	Maharashtra	2020-06-20	20B	B.1.1.306	GR	Others	NA
EPI_ISL_508254	Maharashtra	2020-06-17	20B	B.1.1.306	GR	Others	NA
EPI_ISL_508257	Maharashtra	2020-06-20	20B	B.1.1.306	GR	Others	NA
EPI_ISL_508258	Maharashtra	2020-06-20	20B	B.1.1.306	GR	Others	NA
EPI_ISL_508259	Maharashtra	2020-06-18	20B	B.1.1.306	GR	Others	NA
EPI_ISL_508264	Maharashtra	2020-06-17	20B	B.1.1.306	GR	Others	NA
EPI_ISL_508265	Maharashtra	2020-06-18	20B	B.1.1.306	GR	Others	NA
EPI_ISL_508267	Maharashtra	2020-06-18	20B	B.1.1.306	GR	Others	NA
EPI_ISL_508270	Maharashtra	2020-06-18	20B	B.1.1.306	GR	Others	NA
EPI_ISL_508271	Maharashtra	2020-06-18	20B	B.1.1.306	GR	Others	NA
EPI_ISL_508272	Maharashtra	2020-06-18	20B	B.1.1.306	GR	Others	NA
EPI_ISL_508274	Maharashtra	2020-06-17	20B	B.1.1.306	GR	Others	NA
EPI_ISL_508275	Maharashtra	2020-06-18	20B	B.1.1.306	GR	Others	NA
EPI_ISL_508278	Maharashtra	2020-06-18	20B	B.1.1.306	GR	Others	NA
EPI_ISL_508280	Maharashtra	2020-06-18	20B	B.1.1.306	GR	Others	NA
EPI_ISL_508281	Maharashtra	2020-06-18	20B	B.1.1.306	GR	Others	NA
EPI_ISL_508282	Maharashtra	2020-06-15	20B	B.1.1.306	GR	Others	NA
EPI_ISL_508283	Maharashtra	2020-06-15	20B	B.1.1.306	GR	Others	NA
EPI_ISL_508287	Karnataka	2020-06-19	20B	B.1.1.46	GR	Others	NA
EPI_ISL_508288	Karnataka	2020-06-20	20B	B.1.1	GR	Others	NA
EPI_ISL_511899	West Bengal	2020-05-26	20A	B.1	G	Others	NA
EPI_ISL_910073	Telangana	2020-08-28	20B	B.1.1.326	GR	Others	NA
EPI_ISL_910074	Telangana	2020-08-29	20B	B.1.1.306	GR	Others	NA
EPI_ISL_910076	Telangana	2020-08-29	20B	B.1.1.306	GR	Others	NA
EPI_ISL_910077	Telangana	2020-08-29	20C	B.1.369	GH	Others	NA
EPI_ISL_910078	Telangana	2020-08-29	20B	B.1.1.326	GR	Others	NA
EPI_ISL_910079	Telangana	2020-08-29	20B	B.1.1.306	GR	Others	NA
EPI_ISL_910080	Telangana	2020-08-29	20B	B.1.1.326	GR	Others	NA
EPI_ISL_910081	Telangana	2020-08-29	20A	B.1.36.8	GH	Others	NA
EPI_ISL_910082	Telangana	2020-08-29	20B	B.1.1.326	GR	Others	NA
EPI_ISL_910084	Telangana	2020-08-29	20B	B.1.1.306	GR	Others	NA
EPI_ISL_910085	Telangana	2020-08-29	20B	B.1.1.326	GR	Others	NA
EPI_ISL_910208	Telangana	2020-09-17	20B	B.1.1.306	GR	Others	NA
EPI_ISL_910209	Telangana	2020-09-17	20B	B.1.1.306	GR	Others	NA
EPI_ISL_910211	Telangana	2020-09-18	20B	B.1.1.306	GR	Others	NA
EPI_ISL_910212	Telangana	2020-09-18	20B	B.1.1.306	GR	Others	NA
EPI_ISL_910214	Telangana	2020-09-18	20A	B.1.36.8	GH	Others	NA
EPI_ISL_910215	Telangana	2020-09-19	20A	B.1.36.29	GH	Others	NA
EPI_ISL_910217	Telangana	2020-09-19	20B	B.1.1.306	GR	Others	NA
EPI_ISL_910219	Telangana	2020-09-19	20B	B.1.1.326	GR	Others	NA
EPI_ISL_910220	Telangana	2020-09-19	20A	B.1.36.29	GH	Others	NA
EPI_ISL_910225	Telangana	2020-09-20	20A	B.1.36.29	GH	Others	NA
EPI_ISL_910228	Telangana	2020-09-21	20B	B.1.1.306	GR	Others	NA
EPI_ISL_910233	Telangana	2020-09-22	20B	B.1.1.326	GR	Others	NA
EPI_ISL_910237	Telangana	2020-09-22	20B	B.1.1.326	GR	Others	NA
EPI_ISL_910238	Telangana	2020-09-22	20A	B.1.36.29	GH	Others	NA
EPI_ISL_910239	Telangana	2020-09-22	20A	B.1.36.29	GH	Others	NA
EPI_ISL_910240	Telangana	2020-09-22	20A	B.1.36.29	GH	Others	NA
EPI_ISL_910241	Telangana	2020-09-23	20B	B.1.1.326	GR	Others	NA
EPI_ISL_910243	Telangana	2020-09-24	20B	B.1.1.326	GR	Others	NA
EPI_ISL_910244	Telangana	2020-09-24	20B	B.1.1.326	GR	Others	NA
EPI_ISL_910246	Telangana	2020-09-24	20B	B.1.1.326	GR	Others	NA
EPI_ISL_910247	Telangana	2020-09-24	20B	B.1.1.306	GR	Others	NA
EPI_ISL_910250	Telangana	2020-09-24	20B	B.1.1	GR	Others	NA
EPI_ISL_910254	Telangana	2020-09-25	20B	B.1.1.326	GR	Others	NA
EPI_ISL_910257	Telangana	2020-09-25	20B	B.1.1.306	GR	Others	NA
EPI_ISL_910259	Telangana	2020-09-25	20B	B.1.1.306	GR	Others	NA
EPI_ISL_910266	Telangana	2020-09-26	20A	B.1.36.29	GH	Others	NA
EPI_ISL_910267	Telangana	2020-09-26	20B	B.1.1.326	GR	Others	NA
EPI_ISL_910269	Telangana	2020-09-26	20A	B.1.36.29	GH	Others	NA
EPI_ISL_910274	Telangana	2020-09-28	20B	B.1.1.306	GR	Others	NA
EPI_ISL_910275	Telangana	2020-09-28	20B	B.1.1.326	GR	Others	NA
EPI_ISL_910279	Telangana	2020-09-28	20A	B.1.540	G	Others	NA
EPI_ISL_910282	Telangana	2020-09-29	20B	B.1.1.326	GR	Others	NA
EPI_ISL_910283	Telangana	2020-09-29	20B	B.1.1.306	GR	Others	NA
EPI_ISL_910285	Telangana	2020-09-29	20A	B.1.36.29	GH	Others	NA
EPI_ISL_910286	Telangana	2020-09-29	20B	B.1.1.326	GR	Others	NA
EPI_ISL_1055383	Maharashtra	2020-03-10	20A	B.1.210	G	Others	NA
EPI_ISL_1055384	Maharashtra	2020-03-19	19A	B.6.6	O	Others	NA
EPI_ISL_1063850	Odisha	2020-12-21	20B	B.1.1.274	GR	Others	NA
EPI_ISL_1063854	Odisha	2021-01-02	20A	B.1.36	GH	Others	NA
EPI_ISL_1063855	Odisha	2020-12-16	20A	B.1.36	GH	Others	NA
EPI_ISL_1063857	Odisha	2021-01-22	20A	B.1.36	GH	Others	NA
EPI_ISL_1063859	Odisha	2021-01-21	20B	B.1.1	GR	Others	NA
EPI_ISL_1063860	Odisha	2021-01-19	20B	B.1.1	GR	Others	NA
EPI_ISL_1063862	Odisha	2020-11-03	20B	B.1.1.216	GR	Others	NA
EPI_ISL_1063864	Odisha	2020-11-03	20B	B.1.1	GR	Others	NA
EPI_ISL_1063866	Odisha	2020-11-03	20B	B.1.1	GR	Others	NA
EPI_ISL_1063867	Odisha	2020-11-03	20B	B.1.1	GR	Others	NA
EPI_ISL_1380202	Telangana	2020-10-16	20A	B.1.195	G	Others	NA
EPI_ISL_1380203	Telangana	2020-10-16	20B	B.1.1	GR	Others	NA
EPI_ISL_1380207	Telangana	2020-10-16	20A	B.1.36.29	GH	Others	NA
EPI_ISL_1380208	Telangana	2020-10-16	20B	B.1.1	GR	Others	NA
EPI_ISL_1380209	Telangana	2020-10-16	20A	B.1.36.29	GH	Others	NA
EPI_ISL_1380210	Telangana	2020-10-16	20A	B.1.36.29	GH	Others	NA
EPI_ISL_1380213	Telangana	2020-10-17	20A	B.1.36.29	GH	Others	NA
EPI_ISL_1380214	Telangana	2020-10-17	20B	B.1.1.306	GR	Others	NA
EPI_ISL_1380217	Telangana	2020-10-17	20A	B.1.36.29	GH	Others	NA
EPI_ISL_1380218	Telangana	2020-10-17	20A	B.1.36.29	GH	Others	NA
EPI_ISL_1380220	Telangana	2020-11-01	20A	B.1.36.29	GH	Others	NA
EPI_ISL_1380221	Telangana	2020-11-01	20A	B.1.195	G	Others	NA
EPI_ISL_1380222	Telangana	2020-11-01	20A	B.1.36.29	GH	Others	NA
EPI_ISL_1380223	Telangana	2020-11-01	20A	B.1.36	GH	Others	NA
EPI_ISL_1380224	Telangana	2020-11-01	20A	B.1.36.29	GH	Others	NA
EPI_ISL_1380226	Telangana	2020-11-01	20A	B.1.36.29	GH	Others	NA
EPI_ISL_1380227	Telangana	2020-11-01	20B	B.1.1.326	GR	Others	NA
EPI_ISL_1380228	Telangana	2020-11-03	20C	B.1.369	GH	Others	NA
EPI_ISL_1380229	Telangana	2020-11-03	20A	B.1.36.29	GH	Others	NA
EPI_ISL_1380230	Telangana	2020-11-03	20A	B.1.36.29	GH	Others	NA
EPI_ISL_1380233	Telangana	2020-11-03	20A	B.1.36.29	GH	Others	NA
EPI_ISL_1380234	Telangana	2020-11-03	20A	B.1.36.29	GH	Others	NA
EPI_ISL_1380235	Telangana	2020-11-03	20A	B.1.36.29	GH	Others	NA
EPI_ISL_1380236	Telangana	2020-11-03	20A	B.1.36.29	GH	Others	NA
EPI_ISL_1380237	Telangana	2020-11-04	20A	B.1.36.29	GH	Others	NA
EPI_ISL_1380238	Telangana	2020-11-04	20B	B.1.1	GR	Others	NA
EPI_ISL_1380239	Telangana	2020-11-04	20A	B.1.36.29	GH	Others	NA
EPI_ISL_1380241	Telangana	2020-11-04	20B	B.1.1	GR	Others	NA
EPI_ISL_1380242	Telangana	2020-11-04	20A	B.1.36.29	GH	Others	NA
EPI_ISL_1380243	Telangana	2020-11-04	20B	B.1.1.306	GR	Others	NA
EPI_ISL_1380244	Telangana	2020-11-05	20B	B.1.1.326	GR	Others	NA
EPI_ISL_1380245	Telangana	2020-11-05	20A	B.1.36.29	GH	Others	NA
EPI_ISL_1380250	Telangana	2020-11-05	20B	B.1.1.10	GR	Others	NA
EPI_ISL_1380251	Telangana	2020-11-06	20A	B.1.36.29	GH	Others	NA
EPI_ISL_1380253	Telangana	2020-11-06	20A	B.1.36.29	GH	Others	NA
EPI_ISL_1380254	Telangana	2020-11-06	20B	B.1.1.174	GR	Others	NA
EPI_ISL_1380255	Telangana	2020-11-06	20A	B.1.36.29	GH	Others	NA
EPI_ISL_1380257	Telangana	2020-11-07	20A	B.1.36.29	GH	Others	NA
EPI_ISL_1380258	Telangana	2020-11-08	20B	B.1.1.326	GR	Others	NA
EPI_ISL_1380259	Telangana	2020-11-08	20A	B.1.36.29	GH	Others	NA
EPI_ISL_1380260	Telangana	2020-11-08	20A	B.1.36.29	G	Others	NA
EPI_ISL_1380261	Telangana	2020-11-08	20A	B.1.36.29	GH	Others	NA
EPI_ISL_1380262	Telangana	2020-11-08	20B	B.1.1	GR	Others	NA
EPI_ISL_1380265	Telangana	2020-11-08	20A	B.1.36.29	GH	Others	NA
EPI_ISL_1380266	Telangana	2020-11-08	20B	B.1.1.326	GR	Others	NA
EPI_ISL_1380267	Telangana	2020-11-10	20A	B.1.36.29	GH	Others	NA
EPI_ISL_1380268	Telangana	2020-11-10	20A	B.1.36.29	GH	Others	NA
EPI_ISL_1380275	Telangana	2020-11-13	20A	B.1.36.29	GH	Others	NA
EPI_ISL_1380276	Telangana	2020-11-13	20A	B.1.36.29	GH	Others	NA
EPI_ISL_1380278	Telangana	2020-11-13	20B	B.1.1.306	GR	Others	NA
EPI_ISL_1419472	West Bengal	2021-01-27	20B	B.1.1.25	GR	Others	NA
EPI_ISL_1419475	West Bengal	2021-01-25	20B	B.1.1	GR	Others	NA
EPI_ISL_1419477	West Bengal	2020-12-24	20B	B.1.1	GR	Others	NA
EPI_ISL_1419478	West Bengal	2021-01-27	20B	B.1.1	GR	Others	NA
EPI_ISL_1419480	West Bengal	2021-01-27	20B	B.1.1	GR	Others	NA
EPI_ISL_1419485	West Bengal	2021-02-16	20A	B.1.618	G	Others	NA
EPI_ISL_1419486	West Bengal	2020-11-04	20A	B.1.36	GH	Others	NA
EPI_ISL_1419488	West Bengal	2020-11-05	20A	B.1.36	GH	Others	NA
EPI_ISL_444460	Gujarat	2020-04-30	20A	B.1	G	Others	NA
EPI_ISL_444461	Gujarat	2020-04-29	20A	B.1.36.8	GH	Others	NA
EPI_ISL_444462	Gujarat	2020-04-29	20A	B.1.145	G	Others	NA
EPI_ISL_444463	Gujarat	2020-04-29	20A	B.1	G	Others	NA
EPI_ISL_444467	Gujarat	2020-04-29	20A	B.1	GH	Others	NA
EPI_ISL_444480	Gujarat	2020-04-30	20A	B.1	GH	Others	NA
EPI_ISL_444482	Gujarat	2020-05-02	20A	B.1	GH	Others	NA
EPI_ISL_444483	Gujarat	2020-05-02	20A	B.1	G	Others	NA
EPI_ISL_444486	Gujarat	2020-05-04	20A	B.1.36.8	GH	Others	NA
EPI_ISL_450321	Maharashtra	2020-04-04	19A	B.6	O	Others	NA
EPI_ISL_450324	Maharashtra	2020-03-26	19B	A	S	Others	NA
EPI_ISL_450325	Maharashtra	2020-03-17	20A	B.1	G	Others	NA
EPI_ISL_450327	Telangana	2020-04-01	19A	B.6	O	Others	NA
EPI_ISL_450328	Telangana	2020-04-01	19A	B.6	O	Others	NA
EPI_ISL_450332	Telangana	2020-04-01	19A	B.6	O	Others	NA
EPI_ISL_508290	Karnataka	2020-06-21	20B	B.1.1	GR	Others	NA
EPI_ISL_508291	Karnataka	2020-06-15	20B	B.1.1.46	GR	Others	NA
EPI_ISL_508292	Karnataka	2020-06-18	19A	B.6	O	Others	NA
EPI_ISL_508295	Karnataka	2020-06-20	20B	B.1.1.46	GR	Others	NA
EPI_ISL_508296	Karnataka	2020-06-15	20B	B.1.1.46	GR	Others	NA
EPI_ISL_508297	Karnataka	2020-06-17	20B	B.1.1.46	GR	Others	NA
EPI_ISL_508298	Karnataka	2020-06-21	20B	B.1.1.46	GR	Others	NA
EPI_ISL_508299	Karnataka	2020-06-17	20B	B.1.1.46	GR	Others	NA
EPI_ISL_508312	Karnataka	2020-06-20	20B	B.1.1.46	GR	Others	NA
EPI_ISL_508313	Karnataka	2020-06-15	20B	B.1.1.46	GR	Others	NA
EPI_ISL_508315	Karnataka	2020-06-10	20B	B.1.1.46	GR	Others	NA
EPI_ISL_508316	Karnataka	2020-06-15	20B	B.1.1	GR	Others	NA
EPI_ISL_508318	Karnataka	2020-06-17	20B	B.1.1.46	GR	Others	NA
EPI_ISL_508321	Karnataka	2020-06-15	20B	B.1.1.46	GR	Others	NA
EPI_ISL_508322	Karnataka	2020-06-17	20B	B.1.1.46	GR	Others	NA
EPI_ISL_508323	Karnataka	2020-06-15	20B	B.1.1	GR	Others	NA
EPI_ISL_508324	Karnataka	2020-05-09	20A	B.1.36.8	GH	Others	NA
EPI_ISL_508325	Karnataka	2020-06-03	19A	B.6	O	Others	NA
EPI_ISL_508327	Karnataka	2020-06-03	20B	B.1.1.46	GR	Others	NA
EPI_ISL_539483	Punjab	2020-04-27	19A	B.6	O	Others	NA
EPI_ISL_539486	Punjab	2020-04-30	19A	B.6	O	Others	NA
EPI_ISL_539487	Punjab	2020-05-30	19A	B.6	O	Others	NA
EPI_ISL_577679	Maharashtra	2020-09-28	20B	B.1.1.306	GR	Others	NA
EPI_ISL_577680	Maharashtra	2020-09-28	20B	B.1.1.306	GR	Others	NA
EPI_ISL_577681	Maharashtra	2020-09-28	20B	B.1.1.306	GR	Others	NA
EPI_ISL_577683	Maharashtra	2020-09-28	20A	B.1.36.8	GH	Others	NA
EPI_ISL_577689	Maharashtra	2020-09-28	20B	B.1.1.306	GR	Others	NA
EPI_ISL_577692	Maharashtra	2020-09-29	20B	B.1.1.306	GR	Others	NA
EPI_ISL_577695	Maharashtra	2020-09-29	20B	B.1.1.306	GR	Others	NA
EPI_ISL_577712	Maharashtra	2020-09-29	20A	B.1	G	Others	NA
EPI_ISL_577718	Maharashtra	2020-09	20A	B.1	G	Others	NA
EPI_ISL_577720	Maharashtra	2020-09-25	20B	B.1.1.306	GR	Others	NA
EPI_ISL_577722	Maharashtra	2020-09-26	20A	B.1.36	GH	Others	NA
EPI_ISL_577723	Maharashtra	2020-09-26	20B	B.1.1.306	GR	Others	NA
EPI_ISL_577727	Maharashtra	2020-09-08	20A	B.1.36	GH	Others	NA
EPI_ISL_577732	Maharashtra	2020-09	20A	B.1	G	Others	NA
EPI_ISL_577733	Maharashtra	2020-09	20B	B.1.1.306	GR	Others	NA
EPI_ISL_825034	Gujarat	2020-11-20	20A	B.1.36	GH	Others	NA
EPI_ISL_825035	Gujarat	2020-11-19	20A	B.1.36	GH	Others	NA
EPI_ISL_825036	Gujarat	2020-12-03	20A	B.1.36	GH	Others	NA
EPI_ISL_825037	Gujarat	2020-11-10	20A	B.1	G	Others	NA
EPI_ISL_825038	Gujarat	2020-11-10	20A	B.1	G	Others	NA
EPI_ISL_825039	Gujarat	2020-11-10	20A	B.1	G	Others	NA
EPI_ISL_825040	Gujarat	2020-11-10	20A	B.1	G	Others	NA
EPI_ISL_825041	Gujarat	2020-11-10	20A	B.1	G	Others	NA
EPI_ISL_825042	Gujarat	2020-11-24	20A	B.1.36	GH	Others	NA
EPI_ISL_825050	Gujarat	2020-12-24	20I/501Y.V1	B.1.1.7	GRY	Alpha	VOC
EPI_ISL_825054	Gujarat	2020-12-25	20I/501Y.V1	B.1.1.7	GR	Alpha	VOC
EPI_ISL_825057	Gujarat	2020-12-24	20B	B.1.1.306	GR	Others	NA
EPI_ISL_825058	Gujarat	2020-12-24	20B	B.1.1.306	GR	Others	NA
EPI_ISL_825060	Gujarat	2020-12-26	20I/501Y.V1	B.1.1.7	GRY	Alpha	VOC
EPI_ISL_825061	Gujarat	2020-12-29	20A	B.1.36.8	GH	Others	NA
EPI_ISL_825062	Gujarat	2020-12-29	20A	B.1.36.8	GH	Others	NA
EPI_ISL_825063	Gujarat	2020-12-30	20A	B.1.36.8	GH	Others	NA
EPI_ISL_910201	Telangana	2020-09-16	20B	B.1.1.306	GR	Others	NA
EPI_ISL_910203	Telangana	2020-09-16	20B	B.1.1.306	GR	Others	NA
EPI_ISL_910204	Telangana	2020-09-16	20B	B.1.1.306	GR	Others	NA
EPI_ISL_1063806	Odisha	2021-01-21	20A	B.1.36.29	GH	Others	NA
EPI_ISL_1063807	Odisha	2020-12-20	20B	B.1.1.74	GR	Others	NA
EPI_ISL_1063808	Odisha	2020-11-09	20B	B.1.1.231	GR	Others	NA
EPI_ISL_1063809	Odisha	2020-12-18	20A	B.1	G	Others	NA
EPI_ISL_1063812	Odisha	2021-01-26	20A	B.1.36	GH	Others	NA
EPI_ISL_1063813	Odisha	2020-08-10	20B	B.1.1	GR	Others	NA
EPI_ISL_1063815	Odisha	2021-01-23	20A	B.1.36.29	GH	Others	NA
EPI_ISL_1063818	Odisha	2020-10-27	20B	B.1.1.46	GR	Others	NA
EPI_ISL_1063820	Odisha	2020-07-03	20B	B.1.1.101	GR	Others	NA
EPI_ISL_1063821	Odisha	2020-07-03	20B	B.1.1.116	GR	Others	NA
EPI_ISL_1063822	Odisha	2020-07-03	20B	B.1.1	GR	Others	NA
EPI_ISL_1063826	Odisha	2020-08-11	20B	B.1.1.306	GR	Others	NA
EPI_ISL_1063827	Odisha	2020-08-11	20B	B.1.1.306	GR	Others	NA
EPI_ISL_1063829	Odisha	2020-08-11	20B	B.1.1.46	GR	Others	NA
EPI_ISL_1063831	Odisha	2020-08-11	20B	B.1.1.46	GR	Others	NA
EPI_ISL_1063834	Odisha	2020-08-10	20B	B.1.1	GR	Others	NA
EPI_ISL_1063835	Odisha	2020-09-10	20B	B.1.1	GR	Others	NA
EPI_ISL_1063836	Odisha	2020-08-10	20B	B.1.1	GR	Others	NA
EPI_ISL_1063837	Odisha	2020-08-11	20B	B.1.1	GR	Others	NA
EPI_ISL_1063838	Odisha	2020-08-11	20B	B.1.1	GR	Others	NA
EPI_ISL_1063839	Odisha	2020-08-11	20B	B.1.1	GR	Others	NA
EPI_ISL_1063840	Odisha	2020-12-16	20B	B.1.1.274	GR	Others	NA
EPI_ISL_1063841	Odisha	2020-12-17	20B	B.1.1.216	GR	Others	NA
EPI_ISL_1063843	Odisha	2020-12-17	20B	B.1.1	GR	Others	NA
EPI_ISL_1063845	Odisha	2020-12-18	20B	B.1.1	GR	Others	NA
EPI_ISL_1063868	Odisha	2020-11-03	20B	B.1.1	GR	Others	NA
EPI_ISL_1063869	Odisha	2020-11-08	20B	B.1.1	GR	Others	NA
EPI_ISL_1063870	Odisha	2020-11-08	20B	B.1.1.216	GR	Others	NA
EPI_ISL_1063871	Odisha	2020-11-08	20B	B.1.1.46	GR	Others	NA
EPI_ISL_1063872	Odisha	2020-11-08	20B	B.1.1.216	GR	Others	NA
EPI_ISL_1063873	Odisha	2020-11-17	20C	B.1.369	G	Others	NA
EPI_ISL_1063874	Odisha	2020-11-17	20B	B.1.1	GR	Others	NA
EPI_ISL_1063875	Odisha	2020-11-17	20B	B.1.1	GR	Others	NA
EPI_ISL_1063876	Odisha	2020-11-17	20B	B.1.1	GR	Others	NA
EPI_ISL_1063877	Odisha	2021-01-23	20B	B.1.1.46	GR	Others	NA
EPI_ISL_1063878	Odisha	2020-11-02	20B	B.1.1	GR	Others	NA
EPI_ISL_1063879	Odisha	2020-11-09	20B	B.1.1	GR	Others	NA
EPI_ISL_1063880	Odisha	2020-11-09	20B	B.1.1	GR	Others	NA
EPI_ISL_1063881	Odisha	2020-11-09	20B	B.1.1	GR	Others	NA
EPI_ISL_1063882	Odisha	2020-11-09	20B	B.1.1	GR	Others	NA
EPI_ISL_1063884	Odisha	2020-11-09	20B	B.1.1	GR	Others	NA
EPI_ISL_1063885	Odisha	2020-11-09	20B	B.1.1.306	GR	Others	NA
EPI_ISL_1063886	Odisha	2020-11-09	20B	B.1.1	GR	Others	NA
EPI_ISL_1063887	Odisha	2020-11-10	20A	B.1	G	Others	NA
EPI_ISL_1063888	Odisha	2020-11-02	20B	B.1.1	GR	Others	NA
EPI_ISL_1063889	Odisha	2020-11-03	20B	B.1.1	GR	Others	NA
EPI_ISL_1380181	Telangana	2020-10-13	20A	B.1.36.29	GH	Others	NA
EPI_ISL_1380183	Telangana	2020-10-13	20B	B.1.1.326	GR	Others	NA
EPI_ISL_1380186	Telangana	2020-10-13	20A	B.1.195	G	Others	NA
EPI_ISL_1380190	Telangana	2020-10-14	20B	B.1.1.326	GR	Others	NA
EPI_ISL_1380193	Telangana	2020-10-14	20A	B.1.36.29	GH	Others	NA
EPI_ISL_1380194	Telangana	2020-10-15	20A	B.1.36.29	GH	Others	NA
EPI_ISL_1380196	Telangana	2020-10-15	20B	B.1.1.326	GR	Others	NA
EPI_ISL_1380198	Telangana	2020-10-15	20B	B.1.1.326	GR	Others	NA
EPI_ISL_1419490	West Bengal	2020-09-30	20A	B.1.540	G	Others	NA
EPI_ISL_1419491	West Bengal	2020-10-01	20A	B.1.540	G	Others	NA
EPI_ISL_1419492	West Bengal	2020-10-01	20A	B.1.36	GH	Others	NA
EPI_ISL_1419493	West Bengal	2020-10-01	20A	B.1.540	G	Others	NA
EPI_ISL_1419495	West Bengal	2020-11-05	20A	B.1.540	G	Others	NA
EPI_ISL_1419496	West Bengal	2021-02-12	20B	B.1.1.306	GR	Others	NA
EPI_ISL_1419511	West Bengal	2021-02-23	20A	B.1.618	G	Others	NA
EPI_ISL_1419523	West Bengal	2021-02-02	20B	B.1.1.216	GR	Others	NA
EPI_ISL_1419525	West Bengal	2021-02-13	20A	B.1.36.29	GH	Others	NA
EPI_ISL_1419526	West Bengal	2021-02-13	20B	B.1.1.216	GR	Others	NA
EPI_ISL_1419529	West Bengal	2021-02-18	20A	B.1.36	GH	Others	NA
EPI_ISL_1419546	West Bengal	2021-02-19	20B	B.1.1.216	GR	Others	NA
EPI_ISL_1419566	West Bengal	2021-02-22	20B	B.1.1.306	GR	Others	NA
EPI_ISL_1708502	Tamil Nadu	2021-02-24	20I/501Y.V1	B.1.1.7	GR	Alpha	VOC
EPI_ISL_1708503	Tamil Nadu	2021-02-24	20I/501Y.V1	B.1.1.7	GR	Alpha	VOC
EPI_ISL_444458	Gujarat	2020-04-26	20A	B.1.145	G	Others	NA
EPI_ISL_444459	Gujarat	2020-04-30	20A	B.1.36.8	GH	Others	NA
EPI_ISL_444464	Gujarat	2020-04-29	20A	B.1.36.8	GH	Others	NA
EPI_ISL_444465	Gujarat	2020-04-29	20A	B.1.36.8	GH	Others	NA
EPI_ISL_444468	Gujarat	2020-04-29	20A	B.1	G	Others	NA
EPI_ISL_444469	Gujarat	2020-04-29	20A	B.1.36.8	GH	Others	NA
EPI_ISL_444470	Gujarat	2020-04-29	20A	B.1	GH	Others	NA
EPI_ISL_444473	Gujarat	2020-04-29	20A	B.1	G	Others	NA
EPI_ISL_444474	Gujarat	2020-04-29	20A	B.1	GH	Others	NA
EPI_ISL_444475	Gujarat	2020-04-29	20A	B.1.145	G	Others	NA
EPI_ISL_444476	Gujarat	2020-04-29	20A	B.1.36.8	GH	Others	NA
EPI_ISL_444477	Gujarat	2020-04-29	20A	B.1	G	Others	NA
EPI_ISL_508156	Uttarakhand	2020-06-01	20A	B.1.210	G	Others	NA
EPI_ISL_508158	Uttarakhand	2020-05-29	20A	B.1.210	G	Others	NA
EPI_ISL_508159	Uttarakhand	2020-05-22	20B	B.1.1	GR	Others	NA
EPI_ISL_508160	Uttarakhand	2020-06-06	20A	B.1.36	GH	Others	NA
EPI_ISL_508162	Uttarakhand	2020-05-24	20B	B.1.1.306	GR	Others	NA
EPI_ISL_508163	Uttarakhand	2020-05-27	20B	B.1.1.306	GR	Others	NA
EPI_ISL_508164	Uttarakhand	2020-05-27	20A	B.1.36	GH	Others	NA
EPI_ISL_508165	Uttarakhand	2020-05-23	20A	B.1.210	G	Others	NA
EPI_ISL_508166	Uttarakhand	2020-05-30	20A	B.1.210	G	Others	NA
EPI_ISL_508168	Uttar Pradesh	2020-06-02	20A	B.1.36	GH	Others	NA
EPI_ISL_508169	Uttarakhand	2020-05-21	20A	B.1.210	G	Others	NA
EPI_ISL_508300	Karnataka	2020-05-19	20B	B.1.1	GR	Others	NA
EPI_ISL_508301	Karnataka	2020-06-21	20A	B.1	G	Others	NA
EPI_ISL_508302	Karnataka	2020-06-15	20B	B.1.1	GR	Others	NA
EPI_ISL_508303	Karnataka	2020-06-06	20B	B.1.1.201	GR	Others	NA
EPI_ISL_508304	Karnataka	2020-06-17	20B	B.1.1.46	GR	Others	NA
EPI_ISL_508305	Karnataka	2020-05-26	20B	B.1.1	GR	Others	NA
EPI_ISL_508306	Karnataka	2020-06-20	20B	B.1.1.46	GR	Others	NA
EPI_ISL_508307	Karnataka	2020-06-17	20B	B.1.1	GR	Others	NA
EPI_ISL_511900	West Bengal	2020-03-31	19A	B.6.6	O	Others	NA
EPI_ISL_511901	West Bengal	2020-04-05	19B	A.9	S	Others	NA
EPI_ISL_511904	West Bengal	2020-05-14	20A	B.1	G	Others	NA
EPI_ISL_511905	West Bengal	2020-05-17	20A	B.1.540	G	Others	NA
EPI_ISL_511906	West Bengal	2020-05-19	20A	B.1	G	Others	NA
EPI_ISL_511907	West Bengal	2020-05-24	20A	B.1	G	Others	NA
EPI_ISL_511908	Uttarakhand	2020-05-27	20B	B.1.1.306	GR	Others	NA
EPI_ISL_511927	Maharashtra	2020-06-06	20A	B.1.36	GH	Others	NA
EPI_ISL_511928	Haryana	2020-06-10	20B	B.1.1	GR	Others	NA
EPI_ISL_511930	Maharashtra	2020-06-17	20B	B.1.1.306	GR	Others	NA
EPI_ISL_511933	Maharashtra	2020-06-20	20B	B.1.1.306	GR	Others	NA
EPI_ISL_511935	Maharashtra	2020-06-16	20B	B.1.1.306	GR	Others	NA
EPI_ISL_541725	Maharashtra	2020-06-04	20B	B.1.1.306	GR	Others	NA
EPI_ISL_541728	Maharashtra	2020-06-10	20B	B.1.1.306	GR	Others	NA
EPI_ISL_541747	Maharashtra	2020-06-25	20B	B.1.1.306	GR	Others	NA
EPI_ISL_577704	Maharashtra	2020-09-11	20B	B.1.1.306	GR	Others	NA
EPI_ISL_577705	Maharashtra	2020-09-14	20B	B.1.1.306	GR	Others	NA
EPI_ISL_577709	Maharashtra	2020-09-28	20B	B.1.1.306	GR	Others	NA
EPI_ISL_577710	Maharashtra	2020-09-28	20B	B.1.1.306	GR	Others	NA
EPI_ISL_862051	Uttar Pradesh	2021-01-04	20B	B.1.1.216	GR	Others	NA
EPI_ISL_910171	Telangana	2020-09-11	20B	B.1.1.306	GR	Others	NA
EPI_ISL_910172	Telangana	2020-09-11	20B	B.1.1.306	GR	Others	NA
EPI_ISL_910173	Telangana	2020-09-11	20A	B.1.36.8	GH	Others	NA
EPI_ISL_910176	Telangana	2020-09-11	20B	B.1.1.326	GR	Others	NA
EPI_ISL_910180	Telangana	2020-09-12	20B	B.1.1.306	GR	Others	NA
EPI_ISL_910181	Telangana	2020-09-12	20B	B.1.1.326	GR	Others	NA
EPI_ISL_910182	Telangana	2020-09-12	20A	B.1.36.8	GH	Others	NA
EPI_ISL_910183	Telangana	2020-09-13	20B	B.1.1.306	GR	Others	NA
EPI_ISL_910184	Telangana	2020-09-13	20B	B.1.1.326	GR	Others	NA
EPI_ISL_910185	Telangana	2020-09-13	20B	B.1.1.326	GR	Others	NA
EPI_ISL_910187	Telangana	2020-09-13	20A	B.1.36.29	GH	Others	NA
EPI_ISL_910188	Telangana	2020-09-13	20B	B.1.1.216	GR	Others	NA
EPI_ISL_910189	Telangana	2020-09-13	20B	B.1.1.306	GR	Others	NA
EPI_ISL_910190	Telangana	2020-09-13	20B	B.1.1.326	GR	Others	NA
EPI_ISL_910191	Telangana	2020-09-14	20B	B.1.1.326	GR	Others	NA
EPI_ISL_910193	Telangana	2020-09-14	20B	B.1.1.306	GR	Others	NA
EPI_ISL_910194	Telangana	2020-09-14	20B	B.1.1.306	GR	Others	NA
EPI_ISL_910195	Telangana	2020-09-14	20A	B.1.36.29	GH	Others	NA
EPI_ISL_910196	Telangana	2020-09-14	20B	B.1.1.326	GR	Others	NA
EPI_ISL_910197	Telangana	2020-09-15	20A	B.1.36.29	GH	Others	NA
EPI_ISL_1072020	Chandigarh	2020-08-25	20A	B.1.36	GH	Others	NA
EPI_ISL_1081834	Maharashtra	2020-05-21	20A	B.1.210	G	Others	NA
EPI_ISL_1081835	Maharashtra	2020-06-10	20A	B.1.210	G	Others	NA
EPI_ISL_1357706	West Bengal	2021-03-09	20A	B.1.617.1	G	Kappa	VOI
EPI_ISL_1380100	Telangana	2020-10-03	20A	B.1.36.29	GH	Others	NA
EPI_ISL_1380105	Telangana	2020-10-04	20B	B.1.1	GR	Others	NA
EPI_ISL_1380106	Telangana	2020-10-04	20A	B.1.36.29	GH	Others	NA
EPI_ISL_1380108	Telangana	2020-10-04	20B	B.1.1.306	GR	Others	NA
EPI_ISL_1380109	Telangana	2020-10-04	20B	B.1.1.326	GR	Others	NA
EPI_ISL_1380111	Telangana	2020-10-04	20B	B.1.1.306	GR	Others	NA
EPI_ISL_1380112	Telangana	2020-10-04	20B	B.1.1.306	GR	Others	NA
EPI_ISL_1380113	Telangana	2020-10-04	20B	B.1.1.326	GR	Others	NA
EPI_ISL_1380115	Telangana	2020-10-06	20B	B.1.1.306	GR	Others	NA
EPI_ISL_1380116	Telangana	2020-10-06	20B	B.1.1	GR	Others	NA
EPI_ISL_1380118	Telangana	2020-10-06	20B	B.1.1.326	GR	Others	NA
EPI_ISL_1380120	Telangana	2020-10-06	20B	B.1.1.326	GR	Others	NA
EPI_ISL_1380121	Telangana	2020-10-06	20B	B.1.1	GR	Others	NA
EPI_ISL_1380123	Telangana	2020-10-06	20B	B.1.1	GR	Others	NA
EPI_ISL_1380125	Telangana	2020-10-06	20A	B.1.36.29	GH	Others	NA
EPI_ISL_1380127	Telangana	2020-10-06	20A	B.1.36.29	GH	Others	NA
EPI_ISL_1380129	Telangana	2020-10-06	20A	B.1.36	GH	Others	NA
EPI_ISL_1380131	Telangana	2020-10-07	20A	B.1.36.29	GH	Others	NA
EPI_ISL_1380134	Telangana	2020-10-07	20A	B.1.36.29	GH	Others	NA
EPI_ISL_1380138	Telangana	2020-10-07	20A	B.1.36.29	GH	Others	NA
EPI_ISL_1380140	Telangana	2020-10-07	20B	B.1.1.46	GR	Others	NA
EPI_ISL_1380145	Telangana	2020-10-08	20A	B.1.36.29	GH	Others	NA
EPI_ISL_1380146	Telangana	2020-10-08	20A	B.1.36.29	GH	Others	NA
EPI_ISL_1380147	Telangana	2020-10-08	20A	B.1.36.29	GH	Others	NA
EPI_ISL_1380148	Telangana	2020-10-08	20B	B.1.1.306	GR	Others	NA
EPI_ISL_1380150	Telangana	2020-10-08	20B	B.1.1	GR	Others	NA
EPI_ISL_1380151	Telangana	2020-10-08	20B	B.1.1.306	GR	Others	NA
EPI_ISL_1380153	Telangana	2020-10-09	20A	B.1.36.29	GH	Others	NA
EPI_ISL_1380158	Telangana	2020-10-09	20B	B.1.1.326	GR	Others	NA
EPI_ISL_1380159	Telangana	2020-10-09	20A	B.1.36.29	GH	Others	NA
EPI_ISL_1380160	Telangana	2020-10-09	20B	B.1.1	GR	Others	NA
EPI_ISL_1380161	Telangana	2020-10-09	20A	B.1.36	GH	Others	NA
EPI_ISL_1380166	Telangana	2020-10-11	20A	B.1.36.29	GH	Others	NA
EPI_ISL_1380171	Telangana	2020-10-11	20A	B.1.36.29	GH	Others	NA
EPI_ISL_1380172	Telangana	2020-10-11	20B	B.1.1.306	GR	Others	NA
EPI_ISL_1380173	Telangana	2020-10-11	20B	B.1.1.306	GR	Others	NA
EPI_ISL_1419503	West Bengal	2020-08-31	20A	B.1	G	Others	NA
EPI_ISL_1419504	West Bengal	2020-08-31	20B	B.1.1.25	GR	Others	NA
EPI_ISL_1419505	West Bengal	2020-08-31	20A	B.1	G	Others	NA
EPI_ISL_1419507	West Bengal	2020-09-03	20A	B.1	G	Others	NA
EPI_ISL_1419509	West Bengal	2020-09-03	20A	B.1	G	Others	NA
EPI_ISL_1419558	West Bengal	2021-02-21	20B	B.1.1.216	GR	Others	NA
EPI_ISL_1419586	West Bengal	2020-10-21	20A	B.1	G	Others	NA
EPI_ISL_1547802	Maharashtra	2021-03-10	20A	B.1.617.1	G	Kappa	VOI
EPI_ISL_1547804	Maharashtra	2021-03-12	20A	B.1.36.29	GH	Others	NA
EPI_ISL_1547805	Maharashtra	2021-03-13	20A	B.1.617.1	G	Kappa	VOI
EPI_ISL_1708474	Karnataka	2021-02-11	20B	B.1.1	GR	Others	NA
EPI_ISL_1708475	Karnataka	2021-02-11	20B	B.1.1.354	GR	Others	NA
EPI_ISL_1708481	Karnataka	2021-02-11	20B	B.1.1.354	GR	Others	NA
EPI_ISL_1708482	Karnataka	2021-02-11	20B	B.1.1.354	GR	Others	NA
EPI_ISL_1708483	Karnataka	2021-02-11	20A	B.1.560	G	Others	NA
EPI_ISL_1708485	Karnataka	2021-02-11	20B	B.1.1	GR	Others	NA
EPI_ISL_1708486	Karnataka	2021-02-11	20A	B.1.560	G	Others	NA
EPI_ISL_1708489	Karnataka	2021-02-11	20B	B.1.1	GR	Others	NA
EPI_ISL_1708490	Karnataka	2021-02-11	20B	B.1.1	GR	Others	NA
EPI_ISL_1708493	Karnataka	2021-02-11	20A	B.1.560	G	Others	NA
EPI_ISL_1708494	Karnataka	2021-02-11	20B	B.1.1	GR	Others	NA
EPI_ISL_1708496	Karnataka	2021-02-11	20A	B.1.149	G	Others	NA
EPI_ISL_1708501	Tamil Nadu	2021-02-24	20I/501Y.V1	B.1.1.7	GR	Alpha	VOC
EPI_ISL_437440	Gujarat	2020-04-26	20A	B.1	GH	Others	NA
EPI_ISL_437444	Gujarat	2020-04-26	19A	B.6	O	Others	NA
EPI_ISL_437445	Gujarat	2020-04-26	20A	B.1.36.8	GH	Others	NA
EPI_ISL_437446	Gujarat	2020-04-26	20A	B.1.36.8	GH	Others	NA
EPI_ISL_437452	Gujarat	2020-04-26	20A	B.1.36.8	GH	Others	NA
EPI_ISL_437453	Gujarat	2020-04-26	19A	B.6	L	Others	NA
EPI_ISL_455311	Odisha	2020-05-07	19B	B	O	Others	NA
EPI_ISL_486400	Karnataka	2020-05-03	19A	B.4.7	O	Others	NA
EPI_ISL_486408	Karnataka	2020-05-10	19A	B.6	O	Others	NA
EPI_ISL_486409	Karnataka	2020-05-10	19A	B.6	O	Others	NA
EPI_ISL_508170	Uttarakhand	2020-05-22	20A	B.1	GH	Others	NA
EPI_ISL_508171	Uttarakhand	2020-05-21	20B	B.1.1.101	GR	Others	NA
EPI_ISL_508172	Uttarakhand	2020-05-30	20A	B.1.36	GH	Others	NA
EPI_ISL_508174	Uttarakhand	2020-06-01	20B	B.1.1.306	GR	Others	NA
EPI_ISL_508175	Uttarakhand	2020-06-29	20A	B.1.36	GH	Others	NA
EPI_ISL_508176	Uttarakhand	2020-05-26	20A	B.1.36	GH	Others	NA
EPI_ISL_508177	Uttarakhand	2020-06-01	20A	B.1.36	GH	Others	NA
EPI_ISL_508178	Uttarakhand	2020-05-29	20B	B.1.1	GR	Others	NA
EPI_ISL_508181	Uttarakhand	2020-06-02	19B	A	S	Others	NA
EPI_ISL_508182	Uttarakhand	2020-06-08	20A	B.1.36	GH	Others	NA
EPI_ISL_508183	Uttarakhand	2020-05-28	20A	B.1.210	G	Others	NA
EPI_ISL_508184	Uttarakhand	2020-06-01	20B	B.1.1	GR	Others	NA
EPI_ISL_508185	Uttarakhand	2020-05-28	20B	B.1.1.306	GR	Others	NA
EPI_ISL_508187	Uttarakhand	2020-05-28	20B	B.1.1.306	GR	Others	NA
EPI_ISL_508189	Uttarakhand	2020-05-23	19A	B.6	O	Others	NA
EPI_ISL_508191	Uttarakhand	2020-06-01	20B	B.1.1	GR	Others	NA
EPI_ISL_508194	Uttarakhand	2020-05-21	20A	B.1.210	G	Others	NA
EPI_ISL_508195	Uttarakhand	2020-06-03	20A	B.1.36	GH	Others	NA
EPI_ISL_508196	Uttarakhand	2020-05-22	20A	B.1.36	GH	Others	NA
EPI_ISL_508197	Uttarakhand	2020-06-09	20B	B.1.1	GR	Others	NA
EPI_ISL_508198	Uttarakhand	2020-06-09	20B	B.1.1	GR	Others	NA
EPI_ISL_541690	Maharashtra	2020-07-18	20B	B.1.1.306	GR	Others	NA
EPI_ISL_541695	Maharashtra	2020-07-26	20B	B.1.1.306	GR	Others	NA
EPI_ISL_577645	Maharashtra	2020-09-16	20B	B.1.1.306	GR	Others	NA
EPI_ISL_577648	Maharashtra	2020-09-14	20B	B.1.1.306	GR	Others	NA
EPI_ISL_577649	Maharashtra	2020-09-23	20B	B.1.1.306	GR	Others	NA
EPI_ISL_577651	Maharashtra	2020-09-21	20B	B.1.1.306	GR	Others	NA
EPI_ISL_577652	Maharashtra	2020-09-22	20B	B.1.1.306	GR	Others	NA
EPI_ISL_577663	Maharashtra	2020-09-12	20B	B.1.1.306	GR	Others	NA
EPI_ISL_825141	Karnataka	2020-12-23	20B	B.1.1.216	GR	Others	NA
EPI_ISL_910300	Telangana	2020-07-29	20B	B.1.1.201	GR	Others	NA
EPI_ISL_910306	Telangana	2020-07-18	20B	B.1.1.326	GR	Others	NA
EPI_ISL_910309	Telangana	2020-07-20	20B	B.1.1.326	GR	Others	NA
EPI_ISL_910312	Telangana	2020-07-22	20B	B.1.1.326	GR	Others	NA
EPI_ISL_910313	Telangana	2020-07-22	20B	B.1.1.306	GR	Others	NA
EPI_ISL_910315	Telangana	2020-07-23	20B	B.1.1	GR	Others	NA
EPI_ISL_910316	Telangana	2020-07-23	20B	B.1.1.306	GR	Others	NA
EPI_ISL_910318	Telangana	2020-07-23	20B	B.1.1.306	GR	Others	NA
EPI_ISL_910319	Telangana	2020-07-24	20B	B.1.1.306	GR	Others	NA
EPI_ISL_910321	Telangana	2020-07-25	20B	B.1.1.326	GR	Others	NA
EPI_ISL_910323	Telangana	2020-07-26	20B	B.1.1.306	GR	Others	NA
EPI_ISL_995185	Karnataka	2020-12-31	20A	B.1.36.29	GH	Others	NA
EPI_ISL_1073002	Jammu and Kashmir	2020-05-28	20A	B.1.36	GH	Others	NA
EPI_ISL_1073009	Jammu and Kashmir	2020-06-09	20A	B.1.36	GH	Others	NA
EPI_ISL_1073013	Jammu and Kashmir	2020-06-06	20A	B.1	GH	Others	NA
EPI_ISL_1073016	Jammu and Kashmir	2020-06-24	20A	B.1.36	GH	Others	NA
EPI_ISL_1073017	Jammu and Kashmir	2020-05-29	19A	B.6	O	Others	NA
EPI_ISL_1073020	Jammu and Kashmir	2020-08-24	20A	B.1.36	GH	Others	NA
EPI_ISL_1073022	Jammu and Kashmir	2020-08-24	20A	B.1.36	GH	Others	NA
EPI_ISL_1176351	Manipur	2020-07	20B	B.1.1	GR	Others	NA
EPI_ISL_1176353	Manipur	2020-07	20B	B.1.1.306	GR	Others	NA
EPI_ISL_1176354	Manipur	2020-07	20B	B.1.1	GR	Others	NA
EPI_ISL_1380068	Telangana	2020-10-01	20A	B.1.36.29	GH	Others	NA
EPI_ISL_1380081	Telangana	2020-10-02	20A	B.1	G	Others	NA
EPI_ISL_1380087	Telangana	2020-10-02	20A	B.1.36.29	GH	Others	NA
EPI_ISL_1380088	Telangana	2020-10-02	20B	B.1.1	GR	Others	NA
EPI_ISL_1380091	Telangana	2020-10-03	20A	B.1.36.29	GH	Others	NA
EPI_ISL_1380093	Telangana	2020-10-03	20A	B.1.36.29	GH	Others	NA
EPI_ISL_1380096	Telangana	2020-10-03	20B	B.1.1.306	GR	Others	NA
EPI_ISL_1380097	Telangana	2020-10-03	20B	B.1.1.326	GR	Others	NA
EPI_ISL_1380099	Telangana	2020-10-03	20B	B.1.1	GR	Others	NA
EPI_ISL_1419630	West Bengal	2021-03-10	20A	B.1.618	G	Others	NA
EPI_ISL_1419638	West Bengal	2021-03-04	20B	B.1.1.216	GR	Others	NA
EPI_ISL_1419647	West Bengal	2021-03-04	20A	B.1.618	G	Others	NA
EPI_ISL_1419648	West Bengal	2021-03-06	20B	B.1.1.101	GR	Others	NA
EPI_ISL_1419651	West Bengal	2020-09-02	20A	B.1.36	GH	Others	NA
EPI_ISL_1419657	West Bengal	2021-01-30	20A	B.1.36	GH	Others	NA
EPI_ISL_1419658	West Bengal	2021-01-20	20A	B.1	G	Others	NA
EPI_ISL_1419661	West Bengal	2021-01-19	20A	B.1	G	Others	NA
EPI_ISL_1419662	West Bengal	2021-01-25	20B	B.1.1.25	GR	Others	NA
EPI_ISL_1419664	West Bengal	2021-01-26	20B	B.1.1.216	GR	Others	NA
EPI_ISL_1419665	West Bengal	2021-01-29	20A	B.1	G	Others	NA
EPI_ISL_1419666	West Bengal	2021-01-29	20A	B.1	G	Others	NA
EPI_ISL_1419669	West Bengal	2021-02-01	20B	B.1.1.216	GR	Others	NA
EPI_ISL_1419671	West Bengal	2021-02-04	20B	B.1.1.216	GR	Others	NA
EPI_ISL_1419674	West Bengal	2021-02-06	20B	B.1.1.216	GR	Others	NA
EPI_ISL_1419677	West Bengal	2021-02-13	20B	B.1.1	GR	Others	NA
EPI_ISL_1419678	West Bengal	2021-02-15	20B	B.1.1	GR	Others	NA
EPI_ISL_1419680	West Bengal	2020-11-03	20A	B.1	G	Others	NA
EPI_ISL_1419681	West Bengal	2021-02-14	20B	B.1.1	GR	Others	NA
EPI_ISL_1419692	West Bengal	2021-01-30	20B	B.1.1.141	GR	Others	NA
EPI_ISL_1419693	West Bengal	2021-01-12	20B	B.1.1	GR	Others	NA
EPI_ISL_1419695	West Bengal	2021-01-14	20A	B.1.618	G	Others	NA
EPI_ISL_1544003	Maharashtra	2021-02-25	20A	B.1.36	GH	Others	NA
EPI_ISL_1544004	Maharashtra	2021-02-25	20A	B.1.36	GH	Others	NA
EPI_ISL_1544042	Maharashtra	2021-02-26	20A	B.1.617.1	G	Kappa	VOI
EPI_ISL_1589767	West Bengal	2021-03-17	20I/501Y.V1	B.1.1.7	GRY	Alpha	VOC
EPI_ISL_1589769	West Bengal	2021-02-25	20I/501Y.V1	B.1.1.7	GRY	Alpha	VOC
EPI_ISL_1589775	West Bengal	2021-03-07	20I/501Y.V1	B.1.1.7	GRY	Alpha	VOC
EPI_ISL_1589778	West Bengal	2021-02-26	20I/501Y.V1	B.1.1.7	GRY	Alpha	VOC
EPI_ISL_1589779	West Bengal	2021-03-10	20I/501Y.V1	B.1.1.7	GRY	Alpha	VOC
EPI_ISL_458089	Gujarat	2020-05-24	20A	B.1.523	GH	Others	NA
EPI_ISL_458090	Gujarat	2020-05-24	20A	B.1.36.8	GH	Others	NA
EPI_ISL_458091	Gujarat	2020-05-24	20A	B.1.36.8	GH	Others	NA
EPI_ISL_458092	Gujarat	2020-05-24	20A	B.1.36.8	GH	Others	NA
EPI_ISL_458093	Gujarat	2020-05-24	20A	B.1.36	G	Others	NA
EPI_ISL_458095	Gujarat	2020-05-24	20A	B.1.36	GH	Others	NA
EPI_ISL_458096	Gujarat	2020-05-24	20A	B.1	G	Others	NA
EPI_ISL_458097	Gujarat	2020-05-24	20A	B.1.36.8	GH	Others	NA
EPI_ISL_458099	Gujarat	2020-05-24	20A	B.1.36.8	GH	Others	NA
EPI_ISL_477205	Karnataka	2020-05-26	20B	B.1.1.46	GR	Others	NA
EPI_ISL_477207	Karnataka	2020-05-29	20A	B.1	GH	Others	NA
EPI_ISL_477208	Karnataka	2020-06-01	19A	B.6	O	Others	NA
EPI_ISL_477210	Karnataka	2020-06-02	20A	B.1.36.8	GH	Others	NA
EPI_ISL_477211	Karnataka	2020-06-02	20A	B.1.36.8	GH	Others	NA
EPI_ISL_477233	Karnataka	2020-06-16	20B	B.1.1.46	GR	Others	NA
EPI_ISL_477237	Karnataka	2020-06-16	20A	B.1.36	GH	Others	NA
EPI_ISL_477238	Karnataka	2020-06-16	20B	B.1.1.46	GR	Others	NA
EPI_ISL_477239	Karnataka	2020-06-17	20A	B.1.36	GH	Others	NA
EPI_ISL_477242	Karnataka	2020-06-17	20B	B.1.1.46	GR	Others	NA
EPI_ISL_477246	Karnataka	2020-05-02	19A	B.6	O	Others	NA
EPI_ISL_495025	Gujarat	2020-07-04	20A	B.1	G	Others	NA
EPI_ISL_495026	Gujarat	2020-06-05	20A	B.1.143	G	Others	NA
EPI_ISL_495027	Gujarat	2020-06-15	20A	B.1.113	GH	Others	NA
EPI_ISL_495028	Gujarat	2020-06-15	20B	B.1.1	GR	Others	NA
EPI_ISL_495029	Gujarat	2020-06-15	20A	B.1	G	Others	NA
EPI_ISL_495030	Gujarat	2020-06-15	20A	B.1	G	Others	NA
EPI_ISL_495035	Gujarat	2020-06-15	20A	B.1.143	G	Others	NA
EPI_ISL_495036	Gujarat	2020-06-15	20A	B.1.143	G	Others	NA
EPI_ISL_495037	Gujarat	2020-06-15	20A	B.1.113	G	Others	NA
EPI_ISL_495038	Gujarat	2020-06-15	20A	B.1.143	G	Others	NA
EPI_ISL_495039	Gujarat	2020-06-15	20A	B.1.143	G	Others	NA
EPI_ISL_495040	Gujarat	2020-06-15	20A	B.1.113	G	Others	NA
EPI_ISL_495041	Gujarat	2020-06-15	20A	B.1.247	G	Others	NA
EPI_ISL_495042	Gujarat	2020-06-15	20A	B.1	GH	Others	NA
EPI_ISL_495043	Gujarat	2020-06-15	20A	B.1.247	GH	Others	NA
EPI_ISL_495044	Gujarat	2020-06-15	20A	B.1.36.8	GH	Others	NA
EPI_ISL_495045	Gujarat	2020-06-15	20A	B.1.36.8	GH	Others	NA
EPI_ISL_495068	Gujarat	2020-06-08	20A	B.1	G	Others	NA
EPI_ISL_495069	Gujarat	2020-06-08	20A	B.1.36.8	GH	Others	NA
EPI_ISL_495070	Gujarat	2020-06-17	20A	B.1	G	Others	NA
EPI_ISL_495071	Gujarat	2020-06-17	20A	B.1	GH	Others	NA
EPI_ISL_495072	Gujarat	2020-06-17	20A	B.1.247	G	Others	NA
EPI_ISL_495073	Gujarat	2020-06-17	20A	B.1.247	GH	Others	NA
EPI_ISL_495074	Gujarat	2020-06-17	20A	B.1	G	Others	NA
EPI_ISL_495075	Gujarat	2020-06-17	20A	B.1	G	Others	NA
EPI_ISL_495076	Gujarat	2020-06-17	20A	B.1.36.10	GH	Others	NA
EPI_ISL_495077	Gujarat	2020-06-17	19B	A	S	Others	NA
EPI_ISL_495078	Gujarat	2020-06-17	20A	B.1	G	Others	NA
EPI_ISL_495079	Gujarat	2020-06-12	20A	B.1.36.8	GH	Others	NA
EPI_ISL_495080	Gujarat	2020-06-12	19A	B.1	G	Others	NA
EPI_ISL_508200	Uttarakhand	2020-06-09	20A	B.1.36	GH	Others	NA
EPI_ISL_508201	Uttarakhand	2020-06-09	20B	B.1.1.216	GR	Others	NA
EPI_ISL_508202	Uttar Pradesh	2020-06-09	20A	B.1.36	GH	Others	NA
EPI_ISL_508204	Uttarakhand	2020-05-30	20B	B.1.1.306	GR	Others	NA
EPI_ISL_508208	Maharashtra	2020-06-17	20B	B.1.1.306	GR	Others	NA
EPI_ISL_508209	Maharashtra	2020-06-17	20B	B.1.1.306	GR	Others	NA
EPI_ISL_577658	Maharashtra	2020-09-23	20B	B.1.1.306	GR	Others	NA
EPI_ISL_577659	Maharashtra	2020-09-18	20B	B.1.1.306	GR	Others	NA
EPI_ISL_577660	Maharashtra	2020-09-18	20B	B.1.1.101	GR	Others	NA
EPI_ISL_577662	Maharashtra	2020-09-18	20B	B.1.1.101	GR	Others	NA
EPI_ISL_751313	Delhi	2020-08	20A	B.1	GH	Others	NA
EPI_ISL_751316	Delhi	2020-08	20A	B.1.36.8	GH	Others	NA
EPI_ISL_910290	Telangana	2020-09-29	20B	B.1.1.326	GR	Others	NA
EPI_ISL_910291	Telangana	2020-09-29	20A	B.1.36.29	GH	Others	NA
EPI_ISL_910292	Telangana	2020-09-29	20B	B.1.1.306	GR	Others	NA
EPI_ISL_910293	Telangana	2020-09-29	20B	B.1.1.306	GR	Others	NA
EPI_ISL_910294	Telangana	2020-07-29	20B	B.1.1.306	GR	Others	NA
EPI_ISL_1357693	West Bengal	2021-03-01	20A	B.1.617.1	G	Kappa	VOI
EPI_ISL_1357699	West Bengal	2021-03-12	20A	B.1.617.1	G	Kappa	VOI
EPI_ISL_1419617	West Bengal	2021-03-01	20A	B.1.618	G	Others	NA
EPI_ISL_1419619	West Bengal	2021-03-02	20I/501Y.V1	B.1.1.7	GRY	Alpha	VOC
EPI_ISL_1419621	West Bengal	2021-03-02	20I/501Y.V1	B.1.1.7	GRY	Alpha	VOC
EPI_ISL_1419622	West Bengal	2021-02-22	20B	B.1.1.345	GR	Others	NA
EPI_ISL_1419623	West Bengal	2021-02-22	20I/501Y.V1	B.1.1.7	GRY	Alpha	VOC
EPI_ISL_1540455	Maharashtra	2021-02-18	20B	B.1.1.306	GR	Others	NA
EPI_ISL_1540457	Maharashtra	2021-02-24	20A	B.1.36.29	GH	Others	NA
EPI_ISL_1589744	West Bengal	2021-02-24	20A	B.1.36	GH	Others	NA
EPI_ISL_1589747	West Bengal	2021-03-13	20I/501Y.V1	B.1.1.7	GRY	Alpha	VOC
EPI_ISL_1589754	West Bengal	2021-03-10	20B	B.1.1.345	GR	Others	NA
EPI_ISL_1589756	West Bengal	2021-03-11	20B	B.1.1.345	GR	Others	NA
EPI_ISL_1589757	West Bengal	2021-03-03	20I/501Y.V1	B.1.1.7	GRY	Alpha	VOC
EPI_ISL_1589758	West Bengal	2021-03-19	20I/501Y.V1	B.1.1.7	GRY	Alpha	VOC
EPI_ISL_1589759	West Bengal	2021-03-20	20I/501Y.V1	B.1.1.7	GRY	Alpha	VOC
EPI_ISL_1589780	West Bengal	2021-03-28	20I/501Y.V1	B.1.1.7	GRY	Alpha	VOC
EPI_ISL_1589783	West Bengal	2021-03-21	20I/501Y.V1	B.1.1.7	GRY	Alpha	VOC
EPI_ISL_1589786	West Bengal	2021-02-18	20A	B.1.36	GH	Others	NA
EPI_ISL_1589798	West Bengal	2021-02-21	20A	B.1.618	G	Others	NA
EPI_ISL_1703922	Gujarat	2021-03-04	20B	B.1.1.306	GR	Others	NA
EPI_ISL_458030	Tamil Nadu	2020-04-26	20B	B.1.1	GR	Others	NA
EPI_ISL_458035	Tamil Nadu	2020-04-29	19A	B.6	O	Others	NA
EPI_ISL_458037	Tamil Nadu	2020-04-29	20B	B.1.1.201	GR	Others	NA
EPI_ISL_458039	Tamil Nadu	2020-05-06	20B	B.1.1.46	GR	Others	NA
EPI_ISL_458040	Tamil Nadu	2020-05-06	20B	B.1.1	GR	Others	NA
EPI_ISL_458041	Tamil Nadu	2020-05-06	20B	B.1.1.46	GR	Others	NA
EPI_ISL_458042	Tamil Nadu	2020-05-06	20B	B.1.1.46	GR	Others	NA
EPI_ISL_458043	Tamil Nadu	2020-05-06	20B	B.1.1.201	GR	Others	NA
EPI_ISL_458045	Telangana	2020-05-11	20B	B.1.1.8	GR	Others	NA
EPI_ISL_458046	Telangana	2020-05-11	20B	B.1.1.8	GR	Others	NA
EPI_ISL_458047	Telangana	2020-05-11	20B	B.1.1.8	GR	Others	NA
EPI_ISL_458049	Telangana	2020-05-11	20B	B.1.1.8	GR	Others	NA
EPI_ISL_458050	Telangana	2020-05-11	20B	B.1.1.8	GR	Others	NA
EPI_ISL_458051	Telangana	2020-05-12	20A	B.1.210	G	Others	NA
EPI_ISL_458052	Telangana	2020-05-12	20A	B.1.210	G	Others	NA
EPI_ISL_458053	Telangana	2020-05-12	20A	B.1.210	G	Others	NA
EPI_ISL_458054	Telangana	2020-05-13	20B	B.1.1.306	GR	Others	NA
EPI_ISL_458055	Telangana	2020-05-13	20B	B.1.1.306	GR	Others	NA
EPI_ISL_458056	Telangana	2020-05-13	20B	B.1.1.306	GR	Others	NA
EPI_ISL_458057	Telangana	2020-05-13	20B	B.1.1.306	GR	Others	NA
EPI_ISL_458058	Telangana	2020-05-13	20B	B.1.1.306	GR	Others	NA
EPI_ISL_458059	Telangana	2020-05-13	20B	B.1.1.340	GR	Others	NA
EPI_ISL_458060	Telangana	2020-05-13	20B	B.1.1.306	GR	Others	NA
EPI_ISL_458061	Telangana	2020-05-13	20B	B.1.1.306	GR	Others	NA
EPI_ISL_458062	Telangana	2020-04-20	19A	B.6.6	O	Others	NA
EPI_ISL_458063	Telangana	2020-04-20	19A	B.6.6	O	Others	NA
EPI_ISL_458064	Telangana	2020-05-11	20A	B.1.195	G	Others	NA
EPI_ISL_458067	Telangana	2020-04-15	19A	B.6	O	Others	NA
EPI_ISL_458068	Telangana	2020-04-14	19A	B.6	O	Others	NA
EPI_ISL_458070	Telangana	2020-04-12	19A	B.6	O	Others	NA
EPI_ISL_458071	Telangana	2020-04-01	19A	B.6	O	Others	NA
EPI_ISL_458086	Gujarat	2020-05-24	20A	B.1.36.8	GH	Others	NA
EPI_ISL_477183	Gujarat	2020-06-12	20A	B.1	G	Others	NA
EPI_ISL_495016	Gujarat	2020-06-18	20A	B.1.145	G	Others	NA
EPI_ISL_495017	Gujarat	2020-06-18	20A	B.1.36.8	GH	Others	NA
EPI_ISL_495018	Gujarat	2020-06-18	20A	B.1	G	Others	NA
EPI_ISL_495019	Gujarat	2020-06-18	20A	B.1.36.8	GH	Others	NA
EPI_ISL_495022	Gujarat	2020-06-30	20A	B.1.36.8	GH	Others	NA
EPI_ISL_495023	Gujarat	2020-07-02	20A	B.1	GH	Others	NA
EPI_ISL_495031	Gujarat	2020-06-15	20A	B.1	G	Others	NA
EPI_ISL_495032	Gujarat	2020-06-15	20A	B.1	G	Others	NA
EPI_ISL_495033	Gujarat	2020-06-15	20A	B.1.247	GH	Others	NA
EPI_ISL_495034	Gujarat	2020-06-15	20A	B.1	G	Others	NA
EPI_ISL_495046	Gujarat	2020-06-15	20A	B.1.36.8	GH	Others	NA
EPI_ISL_495047	Gujarat	2020-06-15	20A	B.1.113	GH	Others	NA
EPI_ISL_495048	Gujarat	2020-06-15	20A	B.1.113	GH	Others	NA
EPI_ISL_495049	Gujarat	2020-06-15	20B	B.1.247	G	Others	NA
EPI_ISL_495050	Gujarat	2020-06-15	20A	B.1.36.8	GH	Others	NA
EPI_ISL_495051	Gujarat	2020-06-15	20A	B.1.247	G	Others	NA
EPI_ISL_495052	Gujarat	2020-06-15	20A	B.1.143	G	Others	NA
EPI_ISL_495053	Gujarat	2020-06-15	20A	B.1.247	GH	Others	NA
EPI_ISL_495054	Gujarat	2020-06-15	20A	B.1.143	G	Others	NA
EPI_ISL_495055	Gujarat	2020-06-15	20A	B.1.113	GH	Others	NA
EPI_ISL_495056	Gujarat	2020-06-15	20A	B.1.36.8	GH	Others	NA
EPI_ISL_495057	Gujarat	2020-06-15	20A	B.1.36.8	GH	Others	NA
EPI_ISL_495058	Gujarat	2020-06-15	20A	B.1.143	G	Others	NA
EPI_ISL_495059	Gujarat	2020-06-15	20A	B.1.247	GH	Others	NA
EPI_ISL_495060	Gujarat	2020-06-15	20A	B.1	GH	Others	NA
EPI_ISL_495061	Gujarat	2020-06-15	20A	B.1.143	G	Others	NA
EPI_ISL_495062	Gujarat	2020-06-15	20A	B.1.113	G	Others	NA
EPI_ISL_495064	Gujarat	2020-06-19	20A	B.1.36.8	GH	Others	NA
EPI_ISL_495065	Gujarat	2020-06-20	20A	B.1	GH	Others	NA
EPI_ISL_495066	Gujarat	2020-06-20	20A	B.1.113	GH	Others	NA
EPI_ISL_495067	Gujarat	2020-06-08	20A	B.1	G	Others	NA
EPI_ISL_525419	Gujarat	2020-06-18	20A	B.1.36.8	GH	Others	NA
EPI_ISL_525420	Gujarat	2020-06-18	20A	B.1.36.10	GH	Others	NA
EPI_ISL_525422	Gujarat	2020-06-25	20A	B.1.36.8	GH	Others	NA
EPI_ISL_569859	West Bengal	2020-09-10	20A	B.1.36.18	GH	Others	NA
EPI_ISL_569860	West Bengal	2020-09-10	20A	B.1.36	GH	Others	NA
EPI_ISL_569861	West Bengal	2020-09-10	20A	B.1	O	Others	NA
EPI_ISL_569862	West Bengal	2020-09-10	20A	B.1.36	GH	Others	NA
EPI_ISL_569863	West Bengal	2020-08-04	19A	B	O	Others	NA
EPI_ISL_581500	West Bengal	2020-08-12	19A	B	L	Others	NA
EPI_ISL_581501	West Bengal	2020-08-12	20A	B.1.560	O	Others	NA
EPI_ISL_581503	West Bengal	2020-08-12	19A	B.1	O	Others	NA
EPI_ISL_1063627	Punjab	2020-04-17	20B	B.1.1	GR	Others	NA
EPI_ISL_1063774	Chandigarh	2020-04-27	20B	B.1.1	GR	Others	NA
EPI_ISL_1063775	Chandigarh	2020-04-28	20B	B.1.1	GR	Others	NA
EPI_ISL_1063776	Punjab	2020-05-01	19A	B.6	O	Others	NA
EPI_ISL_1063778	Punjab	2020-05-02	19A	B.6	O	Others	NA
EPI_ISL_1063779	Punjab	2020-05-02	19A	B.6	O	Others	NA
EPI_ISL_1063780	Chandigarh	2020-05-08	20B	B.1.1	GR	Others	NA
EPI_ISL_1063781	Chandigarh	2020-05-19	20B	B.1.1.216	GR	Others	NA
EPI_ISL_1063782	Chandigarh	2020-05-20	20A	B.1.36	GH	Others	NA
EPI_ISL_1063783	Chandigarh	2020-06-05	20A	B.1.36	GH	Others	NA
EPI_ISL_1419701	West Bengal	2020-12-01	20B	B.1.1	GR	Others	NA
EPI_ISL_1419702	West Bengal	2021-01-09	20B	B.1.1	GR	Others	NA
EPI_ISL_1419703	West Bengal	2021-01-10	20B	B.1.1.216	GR	Others	NA
EPI_ISL_1419707	West Bengal	2021-01-20	20A	B.1	G	Others	NA
EPI_ISL_1419708	West Bengal	2021-01-20	20B	B.1.1.25	GR	Others	NA
EPI_ISL_1419709	West Bengal	2021-01-20	20B	B.1.1.345	GR	Others	NA
EPI_ISL_1419725	West Bengal	2021-01-23	20B	B.1.1.216	GR	Others	NA
EPI_ISL_1419728	West Bengal	2021-01-27	20B	B.1.1.216	GR	Others	NA
EPI_ISL_1419756	West Bengal	2021-02-10	20B	B.1.1	GR	Others	NA
EPI_ISL_1419759	West Bengal	2021-02-13	20B	B.1.1	GR	Others	NA
EPI_ISL_1419760	West Bengal	2021-02-13	20B	B.1.1.216	GR	Others	NA
EPI_ISL_1419766	West Bengal	2021-02-17	20B	B.1.1.345	GR	Others	NA
EPI_ISL_1419774	West Bengal	2021-02-09	20B	B.1.1	GR	Others	NA
EPI_ISL_1419780	West Bengal	2021-03-12	20I/501Y.V1	B.1.1.7	GRY	Alpha	VOC
EPI_ISL_1419781	West Bengal	2021-03-13	20I/501Y.V1	B.1.1.7	GRY	Alpha	VOC
EPI_ISL_1419786	West Bengal	2020-12-01	20A	B.1.36	GH	Others	NA
EPI_ISL_1419791	West Bengal	2021-02-20	20A	B.1.618	G	Others	NA
EPI_ISL_1544110	Gujarat	2021-02-14	20A	B.1.36	GH	Others	NA
EPI_ISL_1544111	Gujarat	2021-02-15	20I/501Y.V1	B.1.1.7	GRY	Alpha	VOC
EPI_ISL_1544112	Gujarat	2021-02-23	20I/501Y.V1	B.1.1.7	GRY	Alpha	VOC
EPI_ISL_1544113	Gujarat	2021-02-25	20I/501Y.V1	B.1.1.7	GRY	Alpha	VOC
EPI_ISL_1544114	Madhya Pradesh	2021-02-28	20I/501Y.V1	B.1.1.7	GRY	Alpha	VOC
EPI_ISL_1544115	Gujarat	2021-03-01	20I/501Y.V1	B.1.1.7	GRY	Alpha	VOC
EPI_ISL_1544116	Gujarat	2021-03-01	20I/501Y.V1	B.1.1.7	GRY	Alpha	VOC
EPI_ISL_1544117	Gujarat	2021-03-02	20I/501Y.V1	B.1.1.7	GRY	Alpha	VOC
EPI_ISL_1544118	Gujarat	2020-12-18	20A	B.1.36	GH	Others	NA
EPI_ISL_1544119	Gujarat	2020-12-18	20A	B.1.36.8	GH	Others	NA
EPI_ISL_1544120	Gujarat	2020-12-18	20A	B.1.36.24	GH	Others	NA
EPI_ISL_1544121	Gujarat	2020-12-18	20A	B.1.36.24	GH	Others	NA
EPI_ISL_1544122	Gujarat	2020-12-16	20B	B.1.1.216	GR	Others	NA
EPI_ISL_1544123	Gujarat	2020-12-16	20A	B.1.36	GH	Others	NA
EPI_ISL_1544124	Gujarat	2020-12-16	20A	B.1.36	GH	Others	NA
EPI_ISL_1544126	Gujarat	2020-12-16	20A	B.1.36	GH	Others	NA
EPI_ISL_1544127	Gujarat	2020-12-16	20A	B.1.36	GH	Others	NA
EPI_ISL_1544128	Gujarat	2020-12-16	20A	B.1	G	Others	NA
EPI_ISL_1544129	Gujarat	2020-12-16	20A	B.1.36	GH	Others	NA
EPI_ISL_1544130	Gujarat	2020-12-17	20A	B.1.36	GH	Others	NA
EPI_ISL_1544131	Gujarat	2020-12-17	20A	B.1.36	GH	Others	NA
EPI_ISL_1544132	Gujarat	2020-12-17	20A	B.1.36.8	GH	Others	NA
EPI_ISL_1544133	Gujarat	2021-03-12	20A	B.1.36.29	GH	Others	NA
EPI_ISL_1544134	Gujarat	2021-03-12	20A	B.1.36.29	GH	Others	NA
EPI_ISL_1544135	Gujarat	2020-12-18	20A	B.1.36	GH	Others	NA
EPI_ISL_1544136	Gujarat	2020-12-18	20A	B.1.36	GH	Others	NA
EPI_ISL_1544137	Gujarat	2020-12-16	20A	B.1.36.8	GH	Others	NA
EPI_ISL_1544138	Gujarat	2020-12-16	20A	B.1.36	GH	Others	NA
EPI_ISL_1544139	Gujarat	2020-12-16	20A	B.1.36	GH	Others	NA
EPI_ISL_1544140	Gujarat	2020-12-16	20A	B.1.36	GH	Others	NA
EPI_ISL_1544141	Gujarat	2020-12-16	20A	B.1.36.8	GH	Others	NA
EPI_ISL_1544142	Gujarat	2020-11-24	20B	B.1.1	GR	Others	NA
EPI_ISL_1544143	Gujarat	2020-11-24	20B	B.1.1	GR	Others	NA
EPI_ISL_1544144	Gujarat	2020-11-24	20A	B.1.36.29	GH	Others	NA
EPI_ISL_1544145	Gujarat	2020-11-26	20B	B.1.1	GR	Others	NA
EPI_ISL_1544146	Gujarat	2020-11-26	20B	B.1.1.306	GR	Others	NA
EPI_ISL_1544147	Gujarat	2020-11-27	20B	B.1.1.306	GR	Others	NA
EPI_ISL_1544148	Gujarat	2020-11-27	20B	B.1.1.306	GR	Others	NA
EPI_ISL_1544149	Gujarat	2020-11-27	20G	B.1.2	GH	Others	NA
EPI_ISL_1544150	Gujarat	2020-11-27	20G	B.1.2	GH	Others	NA
EPI_ISL_1544153	Gujarat	2020-11-27	20A	B.1	G	Others	NA
EPI_ISL_1544154	Gujarat	2020-11-27	20A	B.1.153	G	Others	NA
EPI_ISL_1544155	Gujarat	2020-11-27	20A	B.1.36.29	GH	Others	NA
EPI_ISL_1544156	Gujarat	2020-11-27	20A	B.1.36.8	GH	Others	NA
EPI_ISL_1544157	Gujarat	2020-11-28	20A	B.1.36.8	GH	Others	NA
EPI_ISL_1544158	Gujarat	2020-12-06	20A	B.1.36	GH	Others	NA
EPI_ISL_1544159	Gujarat	2020-12-06	20A	B.1.36.9	GH	Others	NA
EPI_ISL_1544160	Gujarat	2020-12-08	20A	B.1	G	Others	NA
EPI_ISL_1544161	Gujarat	2020-12-08	20A	B.1.153	G	Others	NA
EPI_ISL_1544163	Gujarat	2020-12-09	20A	B.1.36	GH	Others	NA
EPI_ISL_1544164	Gujarat	2020-12-09	20A	B.1.36.8	GH	Others	NA
EPI_ISL_1544165	Gujarat	2020-12-09	20A	B.1.184	GH	Others	NA
EPI_ISL_1544168	Gujarat	2020-12-17	20A	B.1	G	Others	NA
EPI_ISL_1544169	Gujarat	2020-12-17	20A	B.1.36	GH	Others	NA
EPI_ISL_1589875	West Bengal	2021-03-18	20A	B.1.617.1	G	Kappa	VOI
EPI_ISL_1589878	West Bengal	2021-03-12	20A	B.1.617.1	G	Kappa	VOI
EPI_ISL_1589884	West Bengal	2021-03-22	20A	B.1.617.1	G	Kappa	VOI
EPI_ISL_1589887	West Bengal	2021-03-25	20A	B.1.617.1	G	Kappa	VOI
EPI_ISL_1589896	West Bengal	2021-03-27	20A	B.1.617.1	G	Kappa	VOI
EPI_ISL_476023	Madhya Pradesh	2020-03-31	19A	B.6	L	Others	NA
EPI_ISL_495162	Telangana	2020-05-11	20B	B.1.1.8	GR	Others	NA
EPI_ISL_495163	Telangana	2020-05-29	20B	B.1.1.306	GR	Others	NA
EPI_ISL_495164	Telangana	2020-06-02	20B	B.1.1.326	GR	Others	NA
EPI_ISL_495165	Telangana	2020-06-02	20B	B.1.1.326	GR	Others	NA
EPI_ISL_495171	Telangana	2020-06-04	20B	B.1.1.326	GR	Others	NA
EPI_ISL_495179	Telangana	2020-06-04	19A	B.6	O	Others	NA
EPI_ISL_495181	Telangana	2020-06-06	20B	B.1.1.306	GR	Others	NA
EPI_ISL_495182	Telangana	2020-06-06	20B	B.1.1.10	GR	Others	NA
EPI_ISL_495183	Telangana	2020-06-06	20B	B.1.1.326	GR	Others	NA
EPI_ISL_495184	Telangana	2020-06-06	20B	B.1.1.326	GR	Others	NA
EPI_ISL_495185	Telangana	2020-06-04	20B	B.1.1	GR	Others	NA
EPI_ISL_495187	Telangana	2020-06-06	20B	B.1.1.326	GR	Others	NA
EPI_ISL_495188	Telangana	2020-06-06	20B	B.1.1.306	GR	Others	NA
EPI_ISL_495189	Telangana	2020-06-06	20B	B.1.1.326	GR	Others	NA
EPI_ISL_495190	Telangana	2020-06-06	20B	B.1.1.326	GR	Others	NA
EPI_ISL_495191	Telangana	2020-06-07	20A	B.1.195	G	Others	NA
EPI_ISL_495192	Telangana	2020-06-04	20B	B.1.1.326	GR	Others	NA
EPI_ISL_495194	Telangana	2020-06-04	20B	B.1.1.326	GR	Others	NA
EPI_ISL_495195	Telangana	2020-06-08	20A	B.1.36	GH	Others	NA
EPI_ISL_495196	Telangana	2020-06-04	20B	B.1.1.306	GR	Others	NA
EPI_ISL_495198	Telangana	2020-06-08	20B	B.1.1.326	GR	Others	NA
EPI_ISL_514601	Gujarat	2020-06-25	20A	B.1.145	G	Others	NA
EPI_ISL_514602	Gujarat	2020-06-25	20A	B.1	G	Others	NA
EPI_ISL_514603	Gujarat	2020-06-25	20A	B.1.36.8	GH	Others	NA
EPI_ISL_515968	Karnataka	2020-05-16	20A	B.1.210	G	Others	NA
EPI_ISL_581449	West Bengal	2020-08-04	20B	B.1.1	O	Others	NA
EPI_ISL_581450	West Bengal	2020-08-12	20A	B.1	O	Others	NA
EPI_ISL_581451	West Bengal	2020-08-12	20A	B.1	O	Others	NA
EPI_ISL_581494	West Bengal	2020-08-12	19A	B.1	O	Others	NA
EPI_ISL_721630	Maharashtra	2020-07-22	20B	B.1.1.306	GR	Others	NA
EPI_ISL_721632	Maharashtra	2020-07-25	20B	B.1.1	GR	Others	NA
EPI_ISL_721633	Maharashtra	2020-07-26	20B	B.1.1.306	GR	Others	NA
EPI_ISL_721634	Maharashtra	2020-07-27	20B	B.1.1.306	GR	Others	NA
EPI_ISL_721635	Maharashtra	2020-07-27	20B	B.1.1	GR	Others	NA
EPI_ISL_721636	Maharashtra	2020-07-27	20B	B.1.1	GR	Others	NA
EPI_ISL_721643	Maharashtra	2020-06-23	20B	B.1.1.101	GR	Others	NA
EPI_ISL_721644	Maharashtra	2020-06-23	20B	B.1.1.306	GR	Others	NA
EPI_ISL_721647	Maharashtra	2020-07-11	20A	B.1.210	G	Others	NA
EPI_ISL_721648	Maharashtra	2020-07-13	20B	B.1.1.306	GR	Others	NA
EPI_ISL_721649	Maharashtra	2020-07-14	20B	B.1.1.306	GR	Others	NA
EPI_ISL_721653	Maharashtra	2020-07-22	20B	B.1.1.306	GR	Others	NA
EPI_ISL_721655	Maharashtra	2020-07-26	20B	B.1.1.306	GR	Others	NA
EPI_ISL_721657	Maharashtra	2020-06-05	20B	B.1.1.306	GR	Others	NA
EPI_ISL_721658	Maharashtra	2020-06-08	20B	B.1.1.57	GR	Others	NA
EPI_ISL_721659	Maharashtra	2020-06-19	20B	B.1.1.306	GR	Others	NA
EPI_ISL_721660	Maharashtra	2020-06-26	20B	B.1.1.306	GR	Others	NA
EPI_ISL_721661	Maharashtra	2020-06-26	20B	B.1.1.306	GR	Others	NA
EPI_ISL_721664	Maharashtra	2020-07-01	20B	B.1.1.306	GR	Others	NA
EPI_ISL_721665	Maharashtra	2020-07-01	20B	B.1.1.306	GR	Others	NA
EPI_ISL_721666	Maharashtra	2020-06-03	20A	B.1.210	G	Others	NA
EPI_ISL_721667	Maharashtra	2020-06-03	20A	B.1.210	G	Others	NA
EPI_ISL_944771	West Bengal	2020-10-27	20A	B.1.560	G	Others	NA
EPI_ISL_944772	West Bengal	2020-10-27	20A	B.1	O	Others	NA
EPI_ISL_944773	West Bengal	2020-10-27	20A	B.1	O	Others	NA
EPI_ISL_944775	West Bengal	2020-10-27	20A	B.1	G	Others	NA
EPI_ISL_944776	West Bengal	2020-10-27	20A	B.1	O	Others	NA
EPI_ISL_944781	West Bengal	2020-10-27	20A	B.1.560	G	Others	NA
EPI_ISL_944783	West Bengal	2020-10-27	19A	B.1	O	Others	NA
EPI_ISL_944784	West Bengal	2020-10-26	20A	B.1	O	Others	NA
EPI_ISL_944788	West Bengal	2020-10-26	20A	B.1	GH	Others	NA
EPI_ISL_944789	West Bengal	2020-10-26	20A	B.1	G	Others	NA
EPI_ISL_944791	West Bengal	2020-10-26	20A	B.1.560	G	Others	NA
EPI_ISL_1176333	Manipur	2020-07	20B	B.1.1	GR	Others	NA
EPI_ISL_1176334	Manipur	2020-07	20A	B.1.36	GH	Others	NA
EPI_ISL_1176335	Manipur	2020-07	20A	B.1.36	GH	Others	NA
EPI_ISL_1176336	Manipur	2020-07	20A	B.1.36	GH	Others	NA
EPI_ISL_1176339	Manipur	2020-07	20A	B.1.36	GH	Others	NA
EPI_ISL_1176341	Manipur	2020-08	20A	B.1.36	GH	Others	NA
EPI_ISL_1176342	Manipur	2020-08	20A	B.1.36	GH	Others	NA
EPI_ISL_1176343	Manipur	2020-08	20A	B.1.36	GH	Others	NA
EPI_ISL_1176344	Manipur	2020-08	20A	B.1.36	GH	Others	NA
EPI_ISL_1176345	Manipur	2020-08	20A	B.1.36	GH	Others	NA
EPI_ISL_1176346	Manipur	2020-08	20A	B.1.36	GH	Others	NA
EPI_ISL_1176347	Manipur	2020-08	20A	B.1.36	GH	Others	NA
EPI_ISL_1176348	Manipur	2020-07	20A	B.1.36	GH	Others	NA
EPI_ISL_1419710	West Bengal	2021-01-21	20B	B.1.1	GR	Others	NA
EPI_ISL_1419714	West Bengal	2021-01-24	20B	B.1.1.216	GR	Others	NA
EPI_ISL_1419720	West Bengal	2021-01-20	20A	B.1	G	Others	NA
EPI_ISL_1419722	West Bengal	2021-01-23	20A	B.1.36	GH	Others	NA
EPI_ISL_1419726	West Bengal	2021-01-22	20B	B.1.1	GR	Others	NA
EPI_ISL_1419733	West Bengal	2021-01-28	20B	B.1.1.216	GR	Others	NA
EPI_ISL_1419737	West Bengal	2021-01-30	20A	B.1.36	GH	Others	NA
EPI_ISL_1419738	West Bengal	2021-02-01	20A	B.1.618	G	Others	NA
EPI_ISL_1419741	West Bengal	2021-02-10	20B	B.1.1.216	GR	Others	NA
EPI_ISL_1419745	West Bengal	2021-02-12	20B	B.1.1	GR	Others	NA
EPI_ISL_1419746	West Bengal	2021-02-03	20A	B.1.36.29	GH	Others	NA
EPI_ISL_1419747	West Bengal	2021-02-03	20B	B.1.1	GR	Others	NA
EPI_ISL_1419806	West Bengal	2021-03-06	20B	B.1.1.345	GR	Others	NA
EPI_ISL_1419875	West Bengal	2021-01-20	20A	B	G	Others	NA
EPI_ISL_1419876	West Bengal	2021-01-20	20A	B	G	Others	NA
EPI_ISL_1419877	West Bengal	2021-01-29	20B	B.1.1.216	GR	Others	NA
EPI_ISL_1419880	West Bengal	2021-01-28	20B	B.1.1.216	GR	Others	NA
EPI_ISL_1419882	West Bengal	2021-01-30	20B	B.1.1.216	GR	Others	NA
EPI_ISL_1419883	West Bengal	2021-02-09	20B	B.1.1.216	GR	Others	NA
EPI_ISL_1419884	West Bengal	2021-02-09	20B	B.1.1.216	GR	Others	NA
EPI_ISL_1419885	West Bengal	2020-11-05	20B	B.1.1	GR	Others	NA
EPI_ISL_1419893	West Bengal	2021-03-02	20A	B.1.618	G	Others	NA
EPI_ISL_1419897	West Bengal	2021-01-21	20B	B.1.1	GR	Others	NA
EPI_ISL_1419898	West Bengal	2021-01-16	20B	B.1.1	GR	Others	NA
EPI_ISL_1544050	Maharashtra	2021-02-18	20B	B.1.1.306	GR	Others	NA
EPI_ISL_1544051	Maharashtra	2021-02-18	20A	B.1.36.29	GH	Others	NA
EPI_ISL_1544058	Maharashtra	2021-03-09	20A	B.1.36.29	GH	Others	NA
EPI_ISL_1544062	Maharashtra	2021-03-09	20B	B.1.1.306	GR	Others	NA
EPI_ISL_1544064	Maharashtra	2021-02-24	20A	B.1.617.1	G	Kappa	VOI
EPI_ISL_1544065	Maharashtra	2021-02-24	20A	B.1.617.1	G	Kappa	VOI
EPI_ISL_1544068	Maharashtra	2021-02-26	20A	B.1.617.1	G	Kappa	VOI
EPI_ISL_1589802	West Bengal	2021-03-03	20A	B.1.618	G	Others	NA
EPI_ISL_1589804	West Bengal	2021-03-11	20A	B.1.618	G	Others	NA
EPI_ISL_1589805	West Bengal	2021-03-07	20A	B.1.618	G	Others	NA
EPI_ISL_1589808	West Bengal	2021-03-23	20A	B.1.618	G	Others	NA
EPI_ISL_1589810	West Bengal	2021-03-04	20A	B.1.618	G	Others	NA
EPI_ISL_1589811	West Bengal	2021-03-11	20A	B.1.618	G	Others	NA
EPI_ISL_1589812	West Bengal	2021-03-09	20A	B.1.618	G	Others	NA
EPI_ISL_1589814	West Bengal	2021-03-11	20A	B.1.618	G	Others	NA
EPI_ISL_1589818	West Bengal	2021-03-11	20I/501Y.V1	B.1.1.7	GRY	Alpha	VOC
EPI_ISL_1589819	West Bengal	2021-03-11	20I/501Y.V1	B.1.1.7	GRY	Alpha	VOC
EPI_ISL_1589822	West Bengal	2021-02-28	20A	B.1.36.29	GH	Others	NA
EPI_ISL_1589857	West Bengal	2021-03-25	20A	B.1.617.1	G	Kappa	VOI
EPI_ISL_1589858	West Bengal	2021-02-27	20B	B.1.1.216	GR	Others	NA
EPI_ISL_455645	West Bengal	2020-04-03	19B	A.9	S	Others	NA
EPI_ISL_455646	West Bengal	2020-04-03	20A	B.1.540	G	Others	NA
EPI_ISL_455647	West Bengal	2020-04-19	20A	B.1	G	Others	NA
EPI_ISL_455648	West Bengal	2020-04-20	20A	B.1	G	Others	NA
EPI_ISL_455649	West Bengal	2020-04-20	19B	A.9	S	Others	NA
EPI_ISL_455650	West Bengal	2020-04-20	20A	B.1	G	Others	NA
EPI_ISL_455651	West Bengal	2020-04-21	20A	B.1	G	Others	NA
EPI_ISL_455652	West Bengal	2020-04-21	20A	B.1	G	Others	NA
EPI_ISL_455653	West Bengal	2020-04-21	20A	B.1	G	Others	NA
EPI_ISL_455654	West Bengal	2020-04-21	20A	B.1	G	Others	NA
EPI_ISL_455655	Rajasthan	2020-04-30	20A	B.1	G	Others	NA
EPI_ISL_455656	West Bengal	2020-04-30	19A	B.6.6	O	Others	NA
EPI_ISL_455657	West Bengal	2020-04-30	20A	B.1	G	Others	NA
EPI_ISL_455658	West Bengal	2020-04-30	19B	A	S	Others	NA
EPI_ISL_455660	West Bengal	2020-05-01	20A	B.1	G	Others	NA
EPI_ISL_455661	West Bengal	2020-05-01	20A	B.1	G	Others	NA
EPI_ISL_455662	West Bengal	2020-05-02	20A	B.1.540	G	Others	NA
EPI_ISL_455663	West Bengal	2020-05-02	20A	B.1	G	Others	NA
EPI_ISL_455665	West Bengal	2020-05-01	20A	B.1	G	Others	NA
EPI_ISL_455666	West Bengal	2020-05-01	20A	B.1	G	Others	NA
EPI_ISL_455667	West Bengal	2020-05-03	20A	B.1	G	Others	NA
EPI_ISL_455668	West Bengal	2020-05-05	20A	B.1	G	Others	NA
EPI_ISL_455669	West Bengal	2020-05-03	20A	B.1	G	Others	NA
EPI_ISL_455670	West Bengal	2020-05-03	20A	B.1	G	Others	NA
EPI_ISL_455671	West Bengal	2020-05-03	19B	A.9	S	Others	NA
EPI_ISL_455672	West Bengal	2020-05-03	20A	B.1	G	Others	NA
EPI_ISL_458100	Gujarat	2020-05-24	20A	B.1.36.8	GH	Others	NA
EPI_ISL_458101	Gujarat	2020-05-24	20A	B.1.36	GH	Others	NA
EPI_ISL_458102	Gujarat	2020-05-24	20A	B.1	GH	Others	NA
EPI_ISL_458103	Gujarat	2020-05-05	20A	B.1.36.8	GH	Others	NA
EPI_ISL_458104	Gujarat	2020-05-06	20A	B.1	G	Others	NA
EPI_ISL_458106	Gujarat	2020-05-16	20A	B.1	G	Others	NA
EPI_ISL_458107	Gujarat	2020-05-16	20A	B.1	G	Others	NA
EPI_ISL_458111	Gujarat	2020-05-17	20A	B.1.441	GH	Others	NA
EPI_ISL_458112	Gujarat	2020-05-18	20A	B.1.36.8	GH	Others	NA
EPI_ISL_458113	Gujarat	2020-05-18	20A	B.1.36.8	GH	Others	NA
EPI_ISL_461498	Gujarat	2020-05-27	20A	B.1	G	Others	NA
EPI_ISL_461499	Gujarat	2020-05-27	20A	B.1.36.8	GH	Others	NA
EPI_ISL_477249	Karnataka	2020-05-07	20A	B.1.210	G	Others	NA
EPI_ISL_477250	Karnataka	2020-05-07	20A	B.1.210	G	Others	NA
EPI_ISL_477254	Karnataka	2020	20A	B.1.36.8	GH	Others	NA
EPI_ISL_477256	Karnataka	2020-05-16	20A	B.1.36.8	GH	Others	NA
EPI_ISL_477258	Karnataka	2020-05-16	20A	B.1.36.8	GH	Others	NA
EPI_ISL_477261	Karnataka	2020-05-18	20A	B.1	GH	Others	NA
EPI_ISL_512058	Gujarat	2020-06-18	20A	B.1.36.8	GH	Others	NA
EPI_ISL_512059	Gujarat	2020-06-18	20A	B.1.36.8	GH	Others	NA
EPI_ISL_512060	Gujarat	2020-06-25	20A	B.1.36.8	GH	Others	NA
EPI_ISL_512063	Gujarat	2020-06-25	20A	B.1.36.8	GH	Others	NA
EPI_ISL_512064	Gujarat	2020-06-25	20A	B.1.36.8	GH	Others	NA
EPI_ISL_512065	Gujarat	2020-06-25	20A	B.1.36.8	GH	Others	NA
EPI_ISL_512066	Gujarat	2020-07-27	20A	B.1.36.8	GH	Others	NA
EPI_ISL_512067	Gujarat	2020-07-27	20A	B.1.36.8	GH	Others	NA
EPI_ISL_512068	Gujarat	2020-07-27	20A	B.1.36.8	GH	Others	NA
EPI_ISL_512069	Gujarat	2020-07-27	20A	B.1.36.8	GH	Others	NA
EPI_ISL_512070	Gujarat	2020-06-12	19B	A	S	Others	NA
EPI_ISL_512071	Gujarat	2020-06-12	19B	A	S	Others	NA
EPI_ISL_512072	Gujarat	2020-07-06	20A	B.1.36	GH	Others	NA
EPI_ISL_512073	Gujarat	2020-07-06	20A	B.1.36	GH	Others	NA
EPI_ISL_512074	Gujarat	2020-07-06	20A	B.1.36.8	GH	Others	NA
EPI_ISL_512075	Gujarat	2020-07-09	20A	B.1.247	GH	Others	NA
EPI_ISL_512076	Gujarat	2020-07-09	20A	B.1.36.8	GH	Others	NA
EPI_ISL_512077	Gujarat	2020-07-09	20A	B.1.247	GH	Others	NA
EPI_ISL_514604	Gujarat	2020-06-25	20A	B.1.36.8	GH	Others	NA
EPI_ISL_514605	Gujarat	2020-06-25	20A	B.1.36.8	GH	Others	NA
EPI_ISL_514606	Gujarat	2020-06-25	20A	B.1.36.8	GH	Others	NA
EPI_ISL_514607	Gujarat	2020-06-25	20A	B.1.36.8	GH	Others	NA
EPI_ISL_514610	Gujarat	2020-06-15	20A	B.1.143	G	Others	NA
EPI_ISL_514611	Gujarat	2020-06-05	20A	B.1.36.8	GH	Others	NA
EPI_ISL_514612	Gujarat	2020-06-05	20A	B.1.36.8	GH	Others	NA
EPI_ISL_515954	Karnataka	2020-05-09	19B	A	S	Others	NA
EPI_ISL_515958	Karnataka	2020-05-08	19A	B.6	O	Others	NA
EPI_ISL_515963	Karnataka	2020-05-12	19A	B.4.7	O	Others	NA
EPI_ISL_515966	Karnataka	2020-05-14	19A	B.4.7	O	Others	NA
EPI_ISL_515971	Karnataka	2020-05-16	20B	B.1.1	GR	Others	NA
EPI_ISL_515973	Karnataka	2020-05-16	20A	B.1.210	G	Others	NA
EPI_ISL_581496	West Bengal	2020-08-04	20A	B.1	O	Others	NA
EPI_ISL_581497	West Bengal	2020-08-04	19A	B.1	O	Others	NA
EPI_ISL_581499	West Bengal	2020-08-12	20A	B.1	O	Others	NA
EPI_ISL_605806	Delhi	2020-05-01	19A	B.6.6	O	Others	NA
EPI_ISL_605808	Delhi	2020-05-01	19A	B.6	O	Others	NA
EPI_ISL_605809	Delhi	2020-05-01	19A	B.6	O	Others	NA
EPI_ISL_605811	Delhi	2020-03-31	20B	B.1.1	GR	Others	NA
EPI_ISL_605812	Delhi	2020-03-31	20A	B.1	G	Others	NA
EPI_ISL_605814	Delhi	2020-04-06	20A	B.1.36	GH	Others	NA
EPI_ISL_605815	Delhi	2020-04-05	20A	B.1.36	GH	Others	NA
EPI_ISL_944762	West Bengal	2020-10-26	19A	B	O	Others	NA
EPI_ISL_944765	West Bengal	2020-10-27	20A	B.1	G	Others	NA
EPI_ISL_944769	West Bengal	2020-10-27	20A	B.1	O	Others	NA
EPI_ISL_1063494	Maharashtra	2020-04-20	20A	B.1	G	Others	NA
EPI_ISL_1231409	Tamil Nadu	2020-07	20B	B.1.1.46	GR	Others	NA
EPI_ISL_1231410	Tamil Nadu	2020-07	20B	B.1.1.46	GR	Others	NA
EPI_ISL_1231411	Tamil Nadu	2020-07	20B	B.1.1	GR	Others	NA
EPI_ISL_1231412	Tamil Nadu	2020-07	20B	B.1.1	GR	Others	NA
EPI_ISL_1231413	Tamil Nadu	2020-08	20B	B.1.1	GR	Others	NA
EPI_ISL_1231414	Tamil Nadu	2020-08	20B	B.1.1	GR	Others	NA
EPI_ISL_1231415	Tamil Nadu	2020-08	20B	B.1.1	GR	Others	NA
EPI_ISL_1231416	Tamil Nadu	2020-08	20B	B.1.1.201	GR	Others	NA
EPI_ISL_1231417	Tamil Nadu	2020-08	20B	B.1.1	GR	Others	NA
EPI_ISL_1231418	Tamil Nadu	2020-08	20B	B.1.1	GR	Others	NA
EPI_ISL_1231419	Madhya Pradesh	2020-03	20B	B.1.1.306	GR	Others	NA
EPI_ISL_1231420	Madhya Pradesh	2020-03	20A	B.1	G	Others	NA
EPI_ISL_1231421	Madhya Pradesh	2020-03	20A	B.1	G	Others	NA
EPI_ISL_1231422	Madhya Pradesh	2020-04	20A	B.1.36	GH	Others	NA
EPI_ISL_1231423	Madhya Pradesh	2020-04	20A	B.1	G	Others	NA
EPI_ISL_1231425	Madhya Pradesh	2020-04	19A	B.6.6	O	Others	NA
EPI_ISL_1231426	Madhya Pradesh	2020-05	20A	B.1	G	Others	NA
EPI_ISL_1231427	Madhya Pradesh	2020-05	20A	B.1	G	Others	NA
EPI_ISL_1231428	Madhya Pradesh	2020-05	20A	B.1	G	Others	NA
EPI_ISL_1231430	Madhya Pradesh	2020-06	20B	B.1.1.306	GR	Others	NA
EPI_ISL_1231431	Madhya Pradesh	2020-06	20A	B.1	G	Others	NA
EPI_ISL_1231432	Madhya Pradesh	2020-06	20A	B.1	G	Others	NA
EPI_ISL_1231433	Madhya Pradesh	2020-06	20A	B.1	G	Others	NA
EPI_ISL_1231434	Madhya Pradesh	2020-06	20A	B.1	G	Others	NA
EPI_ISL_1231435	Madhya Pradesh	2020-07	20A	B.1	G	Others	NA
EPI_ISL_1419813	West Bengal	2021-01-21	20A	B.1.36	GH	Others	NA
EPI_ISL_1419815	West Bengal	2020-11-03	20B	B.1.1.216	GR	Others	NA
EPI_ISL_1419817	West Bengal	2020-11-03	20A	B.1.36	GH	Others	NA
EPI_ISL_1419820	West Bengal	2020-09-30	20B	B.1.1.306	GR	Others	NA
EPI_ISL_1419821	West Bengal	2020-09-30	20A	B.1	G	Others	NA
EPI_ISL_1419823	West Bengal	2020-09-30	20B	B.1.1.216	GR	Others	NA
EPI_ISL_1419824	West Bengal	2020-09-30	20B	B.1.1.216	GR	Others	NA
EPI_ISL_1419825	West Bengal	2020-09-30	20A	B.1.36	GH	Others	NA
EPI_ISL_1419826	West Bengal	2020-09-30	20A	B.1	G	Others	NA
EPI_ISL_1419828	West Bengal	2020-09-30	20A	B.1.36.31	GH	Others	NA
EPI_ISL_1419830	West Bengal	2020-09-30	20A	B.1.36	GH	Others	NA
EPI_ISL_1419839	West Bengal	2020-10-21	20A	B.1.36	GH	Others	NA
EPI_ISL_1419842	West Bengal	2020-10-21	20B	B.1.1.216	GR	Others	NA
EPI_ISL_1419843	West Bengal	2020-10-21	20A	B.1.36	GH	Others	NA
EPI_ISL_1419849	West Bengal	2021-02-07	20B	B.1.1.174	GR	Others	NA
EPI_ISL_1419853	West Bengal	2021-02-17	20A	B.1.618	G	Others	NA
EPI_ISL_1419865	West Bengal	2020-10-20	20A	B.1.36	GH	Others	NA
EPI_ISL_1419900	West Bengal	2021-01-22	20B	B.1.1	GR	Others	NA
EPI_ISL_1419901	West Bengal	2020-12-17	20B	B.1.1	GR	Others	NA
EPI_ISL_1419903	West Bengal	2021-01-22	20B	B.1.1	GR	Others	NA
EPI_ISL_1419905	West Bengal	2021-01-29	20A	B.1.36	GH	Others	NA
EPI_ISL_1419909	West Bengal	2021-02-17	20B	B.1.1.345	GR	Others	NA
EPI_ISL_1589902	West Bengal	2021-03-22	20A	B.1.617.1	G	Kappa	VOI
EPI_ISL_1589904	West Bengal	2021-02-26	20A	B.1.617.1	G	Kappa	VOI
EPI_ISL_1589906	West Bengal	2021-03-24	20A	B.1.617.1	G	Kappa	VOI
EPI_ISL_1589910	West Bengal	2021-03-29	20A	B.1.617.1	G	Kappa	VOI
EPI_ISL_1589911	West Bengal	2021-03-29	20A	B.1.617.1	G	Kappa	VOI
EPI_ISL_1589914	West Bengal	2021-03-09	20A	B.1.617.1	G	Kappa	VOI
EPI_ISL_1589915	West Bengal	2021-03-10	20A	B.1.617.1	G	Kappa	VOI
EPI_ISL_1589919	West Bengal	2021-03-13	20A	B.1.617.1	G	Kappa	VOI
EPI_ISL_1589921	West Bengal	2021-03-08	20A	B.1.617.1	G	Kappa	VOI
EPI_ISL_1589925	West Bengal	2021-03-18	20A	B.1.617.1	G	Kappa	VOI
EPI_ISL_1589926	West Bengal	2021-03-19	20A	B.1.617.1	G	Kappa	VOI
EPI_ISL_1589928	West Bengal	2021-03-19	20A	B.1.617.1	G	Kappa	VOI
EPI_ISL_1589929	West Bengal	2021-03-13	20B	B.1.1.306	GR	Others	NA
EPI_ISL_1589932	West Bengal	2021-03-14	20A	B.1.617.1	G	Kappa	VOI
EPI_ISL_1589935	West Bengal	2021-03-12	20A	B.1.617.1	G	Kappa	VOI
EPI_ISL_1589940	West Bengal	2021-03-11	20A	B.1.617.1	G	Kappa	VOI
EPI_ISL_1589941	West Bengal	2021-03-19	20A	B.1.617.1	G	Kappa	VOI
EPI_ISL_1589946	West Bengal	2021-03-04	20B	B.1.1	GR	Others	NA
EPI_ISL_1589948	West Bengal	2021-03-04	20B	B.1.1	GR	Others	NA
EPI_ISL_1589949	West Bengal	2021-03-07	20B	B.1.1.216	GR	Others	NA
EPI_ISL_1589954	West Bengal	2021-02-28	20B	B.1.1.306	GR	Others	NA
EPI_ISL_1589957	West Bengal	2021-03-13	20B	B.1.1	GR	Others	NA
EPI_ISL_1589959	West Bengal	2021-03-14	20B	B.1.1.345	GR	Others	NA
EPI_ISL_1589962	West Bengal	2021-03-16	20A	B.1.36.22	GH	Others	NA
EPI_ISL_1589964	West Bengal	2021-03-13	20B	B.1.1.345	GR	Others	NA
EPI_ISL_1589965	West Bengal	2021-03-17	20B	B.1.1.216	GR	Others	NA
EPI_ISL_1589966	West Bengal	2021-03-09	20B	B.1.1	GR	Others	NA
EPI_ISL_1589967	West Bengal	2021-02-28	20B	B.1.1.216	GR	Others	NA
EPI_ISL_1589972	West Bengal	2021-03-05	20A	B.1.36	GH	Others	NA
EPI_ISL_1589976	West Bengal	2021-02-09	20A	B.1.36.18	GH	Others	NA
EPI_ISL_450781	Gujarat	2020-05-09	20A	B.1.210	G	Others	NA
EPI_ISL_450782	Gujarat	2020-04-11	20A	B.1	GH	Others	NA
EPI_ISL_450783	Gujarat	2020-04-11	20A	B.1.36.8	GH	Others	NA
EPI_ISL_450785	Gujarat	2020-05-10	20B	B.1.1.306	GR	Others	NA
EPI_ISL_450786	Gujarat	2020-05-10	20B	B.1.1.306	GR	Others	NA
EPI_ISL_450787	Gujarat	2020-05-11	19A	B.6.6	O	Others	NA
EPI_ISL_450788	Gujarat	2020-05-06	20A	B.1.145	G	Others	NA
EPI_ISL_461478	Gujarat	2020-05-02	20A	B.1.143	G	Others	NA
EPI_ISL_461479	Gujarat	2020-05-02	20A	B.1.143	G	Others	NA
EPI_ISL_461480	Gujarat	2020-05-02	20A	B.1	GH	Others	NA
EPI_ISL_461482	Gujarat	2020-04-27	19B	A	S	Others	NA
EPI_ISL_461484	Gujarat	2020-05-27	20A	B.1.36.8	GH	Others	NA
EPI_ISL_461485	Gujarat	2020-05-27	20A	B.1.36.8	GH	Others	NA
EPI_ISL_461486	Gujarat	2020-05-27	20A	B.1	G	Others	NA
EPI_ISL_461487	Gujarat	2020-05-27	20A	B.1.210	G	Others	NA
EPI_ISL_461488	Gujarat	2020-05-27	20A	B.1.36.8	GH	Others	NA
EPI_ISL_461489	Gujarat	2020-05-27	20A	B.1.36.8	GH	Others	NA
EPI_ISL_461490	Gujarat	2020-05-27	20A	B.1	G	Others	NA
EPI_ISL_461491	Gujarat	2020-05-27	20A	B.1.36	G	Others	NA
EPI_ISL_461492	Gujarat	2020-05-27	20A	B.1	GH	Others	NA
EPI_ISL_461493	Gujarat	2020-05-27	20A	B.1.210	G	Others	NA
EPI_ISL_461494	Gujarat	2020-05-27	20A	B.1	GH	Others	NA
EPI_ISL_461495	Gujarat	2020-05-27	20A	B.1.36.8	GH	Others	NA
EPI_ISL_461497	Gujarat	2020-05-27	20A	B.1	G	Others	NA
EPI_ISL_514581	Gujarat	2020-06-18	20A	B.1.247	GH	Others	NA
EPI_ISL_514582	Gujarat	2020-06-18	20A	B.1.36.8	GH	Others	NA
EPI_ISL_514583	Gujarat	2020-06-18	20A	B.1.36.8	GH	Others	NA
EPI_ISL_514584	Gujarat	2020-06-18	20A	B.1.36.8	GH	Others	NA
EPI_ISL_514585	Gujarat	2020-06-18	20A	B.1.36.8	GH	Others	NA
EPI_ISL_514586	Gujarat	2020-06-18	20A	B.1.36.8	GH	Others	NA
EPI_ISL_514587	Gujarat	2020-06-18	20A	B.1.36.8	GH	Others	NA
EPI_ISL_514588	Gujarat	2020-06-18	20A	B.1.36.8	GH	Others	NA
EPI_ISL_514589	Gujarat	2020-06-18	20A	B.1.36.8	GH	Others	NA
EPI_ISL_514590	Gujarat	2020-06-18	20A	B.1.36.8	GH	Others	NA
EPI_ISL_514593	Gujarat	2020-06-18	20A	B.1	G	Others	NA
EPI_ISL_514594	Gujarat	2020-06-18	20A	B.1.36.8	GH	Others	NA
EPI_ISL_514595	Gujarat	2020-06-18	20A	B.1.36.8	GH	Others	NA
EPI_ISL_514596	Gujarat	2020-06-18	20A	B.1.36.8	GH	Others	NA
EPI_ISL_514597	Gujarat	2020-06-18	20A	B.1.36.8	GH	Others	NA
EPI_ISL_514598	Gujarat	2020-06-18	20A	B.1.36.8	GH	Others	NA
EPI_ISL_514599	Gujarat	2020-06-18	20A	B.1	GH	Others	NA
EPI_ISL_700001	Madhya Pradesh	2020-07-22	20B	B.1.1.306	GR	Others	NA
EPI_ISL_700003	Maharashtra	2020-07-22	20B	B.1.1.306	GR	Others	NA
EPI_ISL_700004	Maharashtra	2020-07-22	20B	B.1.1.306	GR	Others	NA
EPI_ISL_700007	Maharashtra	2020-07-23	20A	B.1.210	G	Others	NA
EPI_ISL_700016	Maharashtra	2020-07-24	20B	B.1.1.306	GR	Others	NA
EPI_ISL_700021	Maharashtra	2020-07-24	20B	B.1.1.306	GR	Others	NA
EPI_ISL_700029	Maharashtra	2020-07-25	20B	B.1.1.306	GR	Others	NA
EPI_ISL_1063400	Maharashtra	2020-04-11	20A	B.1.210	G	Others	NA
EPI_ISL_1063401	Maharashtra	2020-04-17	20B	B.1.1.306	GR	Others	NA
EPI_ISL_1063403	Punjab	2020-03-18	20A	B.1	G	Others	NA
EPI_ISL_1063527	Maharashtra	2020-04-27	20B	B.1.1.306	GR	Others	NA
EPI_ISL_1063528	Punjab	2020-03-19	20A	B.1	G	Others	NA
EPI_ISL_1063529	Maharashtra	2020-04-29	20A	B.1.210	G	Others	NA
EPI_ISL_1063530	Punjab	2020-04-05	20B	B.1.1	GR	Others	NA
EPI_ISL_1063531	Maharashtra	2020-05-12	20A	B.1.210	G	Others	NA
EPI_ISL_1063532	Punjab	2020-04-05	20B	B.1.1	GR	Others	NA
EPI_ISL_1140052	Sikkim	2020-08	20A	B.1.36.18	GH	Others	NA
EPI_ISL_1140053	Sikkim	2020-08	20A	B.1.36.18	GH	Others	NA
EPI_ISL_1231390	Tamil Nadu	2020-04	20B	B.1.1	GR	Others	NA
EPI_ISL_1231392	Tamil Nadu	2020-05	20B	B.1.1	GR	Others	NA
EPI_ISL_1231393	Tamil Nadu	2020-05	20A	B.1.560	G	Others	NA
EPI_ISL_1231398	Tamil Nadu	2020-05	20B	B.1.1	GR	Others	NA
EPI_ISL_1544170	Gujarat	2020-12-11	20B	B.1.1.216	GR	Others	NA
EPI_ISL_1544172	Gujarat	2020-12-13	20A	B.1.36.8	GH	Others	NA
EPI_ISL_1544173	Gujarat	2020-12-14	20A	B.1.36.8	GH	Others	NA
EPI_ISL_1544174	Gujarat	2020-12-14	20A	B.1.36.8	GH	Others	NA
EPI_ISL_1544175	Gujarat	2020-12-14	20A	B.1.36.8	GH	Others	NA
EPI_ISL_1544176	Gujarat	2020-12-14	20A	B.1.36.8	GH	Others	NA
EPI_ISL_1544177	Gujarat	2020-12-09	20A	B.1.36	GH	Others	NA
EPI_ISL_1544178	Gujarat	2020-12-09	20A	B.1.36.9	GH	Others	NA
EPI_ISL_1544179	Gujarat	2020-11-25	20B	B.1.1.216	GR	Others	NA
EPI_ISL_1544180	Gujarat	2020-11-25	20A	B.1.36	GH	Others	NA
EPI_ISL_1544181	Gujarat	2020-11-24	20B	B.1.1.216	GR	Others	NA
EPI_ISL_1544182	Gujarat	2020-11-24	20B	B.1.1.216	GR	Others	NA
EPI_ISL_1544183	Gujarat	2020-11-28	20B	B.1.1.306	GR	Others	NA
EPI_ISL_1544184	Gujarat	2020-11-28	20A	B.1.36	G	Others	NA
EPI_ISL_1544185	Gujarat	2020-11-25	20B	B.1.1	GR	Others	NA
EPI_ISL_1544186	Gujarat	2020-11-29	20A	B.1.36	GH	Others	NA
EPI_ISL_1544187	Gujarat	2020-11-24	20B	B.1.1.306	GR	Others	NA
EPI_ISL_1544188	Gujarat	2020-11-24	20B	B.1.1.306	GR	Others	NA
EPI_ISL_1544189	Gujarat	2020-11-24	20A	B.1	G	Others	NA
EPI_ISL_1544190	Gujarat	2020-11-24	20A	B.1	G	Others	NA
EPI_ISL_1544191	Gujarat	2020-11-24	20B	B.1.1	GR	Others	NA
EPI_ISL_1544192	Gujarat	2020-11-24	20A	B.1.36	GH	Others	NA
EPI_ISL_1544193	Gujarat	2020-11-24	20A	B.1.36	GH	Others	NA
EPI_ISL_1544194	Gujarat	2020-11-24	20A	B.1.36	GH	Others	NA
EPI_ISL_1544195	Gujarat	2020-11-24	20A	B.1.36.9	GH	Others	NA
EPI_ISL_1647424	Maharashtra	2021-02	20A	B.1.36.29	GH	Others	NA
EPI_ISL_1647425	Maharashtra	2021-01	20A	B.1.36.29	GH	Others	NA
EPI_ISL_1647426	Maharashtra	2021-01	20B	B.1.1.306	GR	Others	NA
EPI_ISL_1647428	Maharashtra	2021-02	20A	B.1.36.24	GH	Others	NA
EPI_ISL_1647431	Maharashtra	2021-02	20A	B.1.36.29	GH	Others	NA
EPI_ISL_1647433	Maharashtra	2021-02	20A	B.1.36.29	GH	Others	NA
EPI_ISL_1647438	Maharashtra	2021-02	20A	B.1.36.29	GH	Others	NA
EPI_ISL_1647439	Maharashtra	2021-02	20A	B.1.36.29	GH	Others	NA
EPI_ISL_1647441	Maharashtra	2021-02	20A	B.1.36.29	GH	Others	NA
EPI_ISL_1647442	Maharashtra	2021-02	20A	B.1.36.29	GH	Others	NA
EPI_ISL_1647443	Maharashtra	2021-02	20B	B.1.1.306	GR	Others	NA
EPI_ISL_1647444	Maharashtra	2021-02	20A	B.1.36.29	GH	Others	NA
EPI_ISL_1647445	Maharashtra	2021-02	20A	B.1.36.29	GH	Others	NA
EPI_ISL_1647446	Maharashtra	2020-12	19B	A	O	Others	NA
EPI_ISL_1647447	Maharashtra	2021-01	20B	B.1.1.216	GR	Others	NA
EPI_ISL_1647448	Maharashtra	2021-01	20A	B.1.36.29	GH	Others	NA
EPI_ISL_1647449	Maharashtra	2021-01	20A	B.1.36.22	GH	Others	NA
EPI_ISL_1647450	Maharashtra	2021-01	20A	B.1.36	GH	Others	NA
EPI_ISL_1647451	Maharashtra	2021-01	20B	B.1.1.306	GR	Others	NA
EPI_ISL_1647452	Maharashtra	2021-01	20A	B.1.36.8	GH	Others	NA
EPI_ISL_1647453	Maharashtra	2021-02	20A	B.1.36	GH	Others	NA
EPI_ISL_1647454	Maharashtra	2021-02	20A	B.1.36.22	GH	Others	NA
EPI_ISL_1647455	Maharashtra	2021-02	20B	B.1.1.216	GR	Others	NA
EPI_ISL_430464	West Bengal	2020-03-21	20B	B.1.1	GR	Others	NA
EPI_ISL_430466	West Bengal	2020-03-26	20A	B.1	G	Others	NA
EPI_ISL_430467	West Bengal	2020-04-03	20A	B.1	G	Others	NA
EPI_ISL_455754	Odisha	2020-05-06	20A	B.1.210	G	Others	NA
EPI_ISL_455761	Odisha	2020-05-07	19B	A.7	S	Others	NA
EPI_ISL_455763	Odisha	2020-05-07	19B	A.7	S	Others	NA
EPI_ISL_455764	Odisha	2020-05-07	19B	A.7	S	Others	NA
EPI_ISL_455765	Odisha	2020-05-07	20A	B.1.210	G	Others	NA
EPI_ISL_455767	Odisha	2020-05-07	19B	A.7	S	Others	NA
EPI_ISL_455768	Odisha	2020-05-07	19A	B.6	O	Others	NA
EPI_ISL_455770	Odisha	2020-05-07	19B	A.7	S	Others	NA
EPI_ISL_455776	Odisha	2020-04-04	20A	B.1	GH	Others	NA
EPI_ISL_455779	Odisha	2020-04-04	20A	B.1	GH	Others	NA
EPI_ISL_455783	Odisha	2020-04-02	20A	B.1	GH	Others	NA
EPI_ISL_455786	Odisha	2020-05-04	20A	B.1	G	Others	NA
EPI_ISL_539700	Telangana	2020-08-19	20B	B.1.1.306	GR	Others	NA
EPI_ISL_539701	Telangana	2020-08-14	20B	B.1.1.306	GR	Others	NA
EPI_ISL_539702	Telangana	2020-08-18	20B	B.1.1.306	GR	Others	NA
EPI_ISL_539706	Telangana	2020-08-14	20B	B.1.1.306	GR	Others	NA
EPI_ISL_539707	Telangana	2020-08-13	20B	B.1.1.306	GR	Others	NA
EPI_ISL_539708	Telangana	2020-08-17	20B	B.1.1.306	GR	Others	NA
EPI_ISL_539709	Telangana	2020-08-14	20B	B.1.1.306	GR	Others	NA
EPI_ISL_539713	Telangana	2020-08-14	20B	B.1.1.306	GR	Others	NA
EPI_ISL_539714	Telangana	2020-08-14	20B	B.1.1.306	GR	Others	NA
EPI_ISL_539715	Telangana	2020-08-14	20B	B.1.1.306	GR	Others	NA
EPI_ISL_539716	Telangana	2020-08-11	20B	B.1.1.340	GR	Others	NA
EPI_ISL_605800	Delhi	2020-04-09	19A	B.6	O	Others	NA
EPI_ISL_605801	Delhi	2020-05-01	20A	B.1.36	GH	Others	NA
EPI_ISL_605804	Delhi	2020-05-01	19A	B.6	O	Others	NA
EPI_ISL_700032	Maharashtra	2020-07-27	20B	B.1.1.216	GR	Others	NA
EPI_ISL_700038	Maharashtra	2020-07-28	20B	B.1.1.306	GR	Others	NA
EPI_ISL_700040	Maharashtra	2020-07-29	20B	B.1.1.306	GR	Others	NA
EPI_ISL_700045	Maharashtra	2020-07-29	20A	B.1	G	Others	NA
EPI_ISL_700055	Maharashtra	2020-07-29	20A	B.1.210	G	Others	NA
[truncated: 4,860 more rows]
