# Supplementary material for: Circulation and Evolution of SARS-CoV-2 in India: Let the Data Speak
Source: Viruses. 2021 Nov 8;13(11):2238. doi: 10.3390/v13112238 (PMC8619538; doi:10.3390/v13112238)
Supplement: Supplementary file 1 [file viruses-13-02238-s001.zip › Supplementary file 5.xlsx]

## Sheet: Dataset_4
Accession_ID	Isolation state	Collection Date	Nextclade	Pangolin	GISAID	WHO	VOI/VOC
EPI_ISL_1192077	Andhra_Pradesh	2020-06	20B	B.1.1.46	GR	Others	NA
EPI_ISL_1192078	Andhra_Pradesh	2020-06	20B	B.1.1.46	GR	Others	NA
EPI_ISL_1192079	Himachal_Pradesh	2020-08	20A	B.1.36	GH	Others	NA
EPI_ISL_1372007	Odisha	2020-12-21	20A	B.1	G	Others	NA
EPI_ISL_1372008	Odisha	2020-11-26	20B	B.1.1	GR	Others	NA
EPI_ISL_1372009	Bihar	2021-02-15	20A	B.1.540	G	Others	NA
EPI_ISL_1380415	Telangana	2020-12-19	20A	B.1.36.29	GH	Others	NA
EPI_ISL_1380416	Telangana	2020-12-19	20B	B.1.1	GR	Others	NA
EPI_ISL_1380417	Telangana	2020-12-19	20A	B.1.36.29	GH	Others	NA
EPI_ISL_1380418	Telangana	2020-12-19	20A	B.1.36.29	GH	Others	NA
EPI_ISL_1380419	Telangana	2020-12-19	20A	B.1.36.29	GH	Others	NA
EPI_ISL_1380424	Telangana	2020-12-19	20A	B.1.36.29	GH	Others	NA
EPI_ISL_1380425	Telangana	2020-12-19	20A	B.1	G	Others	NA
EPI_ISL_1380426	Telangana	2020-12-20	20A	B.1.36.29	GH	Others	NA
EPI_ISL_1380427	Telangana	2020-12-20	20A	B.1.36.29	GH	Others	NA
EPI_ISL_1380428	Telangana	2020-12-20	20A	B.1.36	GH	Others	NA
EPI_ISL_1380429	Telangana	2020-12-20	20A	B.1.36.29	GH	Others	NA
EPI_ISL_1380430	Telangana	2020-12-20	20B	B.1.1.216	GR	Others	NA
EPI_ISL_1380431	Telangana	2020-12-20	20A	B.1.36.29	GH	Others	NA
EPI_ISL_1380432	Telangana	2020-12-20	20A	B.1.36	GH	Others	NA
EPI_ISL_1380433	Telangana	2020-12-20	20A	B.1.36.29	GH	Others	NA
EPI_ISL_1380434	Telangana	2020-12-20	20A	B.1.36.29	GH	Others	NA
EPI_ISL_1380435	Telangana	2020-12-20	20A	B.1.36.29	GH	Others	NA
EPI_ISL_1380436	Telangana	2020-12-20	20B	B.1.1	GR	Others	NA
EPI_ISL_1380437	Telangana	2020-12-20	20A	B.1.36.29	GH	Others	NA
EPI_ISL_1380439	Telangana	2020-12-22	20A	B.1.36.29	GH	Others	NA
EPI_ISL_1380440	Telangana	2020-12-22	20B	B.1.1	GR	Others	NA
EPI_ISL_1380441	Telangana	2020-12-22	20A	B.1.36.29	GH	Others	NA
EPI_ISL_1380442	Telangana	2020-12-22	20A	B.1.36.29	GH	Others	NA
EPI_ISL_1380443	Telangana	2020-12-22	20A	B.1.36.29	GH	Others	NA
EPI_ISL_1380444	Telangana	2020-12-22	20A	B.1	G	Others	NA
EPI_ISL_1380445	Telangana	2020-12-22	20B	B.1.1	GR	Others	NA
EPI_ISL_1380446	Telangana	2020-12-22	20B	B.1.1	GR	Others	NA
EPI_ISL_1380447	Telangana	2020-12-22	20B	B.1.1.216	GR	Others	NA
EPI_ISL_1380448	Telangana	2020-12-22	20B	B.1.1.216	GR	Others	NA
EPI_ISL_1380449	Telangana	2020-12-22	20B	B.1.1.216	GR	Others	NA
EPI_ISL_1380452	Telangana	2020-12-22	20A	B.1.36.29	GH	Others	NA
EPI_ISL_1380453	Telangana	2020-12-22	20B	B.1.1.216	GR	Others	NA
EPI_ISL_1380454	Telangana	2020-12-22	20B	B.1.1.216	GR	Others	NA
EPI_ISL_1380456	Telangana	2020-12-22	20A	B.1.36.29	GH	Others	NA
EPI_ISL_1380457	Telangana	2020-12-22	20B	B.1.1	GR	Others	NA
EPI_ISL_1380458	Telangana	2020-12-22	20A	B.1.36.29	GH	Others	NA
EPI_ISL_1380459	Telangana	2020-12-23	20A	B.1.36.29	GH	Others	NA
EPI_ISL_1380460	Telangana	2020-12-23	20A	B.1.36.29	GH	Others	NA
EPI_ISL_1380461	Telangana	2020-12-23	20A	B.1.36.29	GH	Others	NA
EPI_ISL_1380462	Telangana	2020-12-23	20A	B.1.36.29	GH	Others	NA
EPI_ISL_1380464	Telangana	2020-12-24	20A	B.1.36.29	GH	Others	NA
EPI_ISL_1380465	Telangana	2020-12-24	20A	B.1.36.29	GH	Others	NA
EPI_ISL_1380466	Telangana	2020-12-24	20A	B.1.36.29	GH	Others	NA
EPI_ISL_1380468	Telangana	2020-12-24	20A	B.1.36.29	GH	Others	NA
EPI_ISL_1380469	Telangana	2020-12-25	20A	B.1.36.29	GH	Others	NA
EPI_ISL_1380470	Telangana	2020-12-25	20B	B.1.1.306	GR	Others	NA
EPI_ISL_1380471	Telangana	2020-12-25	20B	B.1.1.326	GR	Others	NA
EPI_ISL_1380472	Telangana	2020-12-25	20B	B.1.1.216	GR	Others	NA
EPI_ISL_1380473	Telangana	2020-12-25	20B	B.1.1.216	GR	Others	NA
EPI_ISL_1380474	Telangana	2020-12-25	20B	B.1.1.216	GR	Others	NA
EPI_ISL_1380475	Telangana	2020-12-25	20B	B.1.1.216	GR	Others	NA
EPI_ISL_1380476	Telangana	2020-12-25	20A	B.1.36.29	GH	Others	NA
EPI_ISL_1380478	Telangana	2020-12-25	20A	B.1.36.29	GH	Others	NA
EPI_ISL_1380479	Telangana	2020-12-25	20A	B.1.36.29	GH	Others	NA
EPI_ISL_1380480	Telangana	2020-12-25	20A	B.1.36.29	GH	Others	NA
EPI_ISL_1380481	Telangana	2020-12-25	20B	B.1.1.326	GR	Others	NA
EPI_ISL_1380482	Telangana	2020-12-25	20A	B.1.36.29	GH	Others	NA
EPI_ISL_1380483	Telangana	2020-12-25	20A	B.1.36.29	GH	Others	NA
EPI_ISL_1380485	Telangana	2020-12-25	20B	B.1	GR	Others	NA
EPI_ISL_1380486	Telangana	2020-12-25	20B	B.1	GR	Others	NA
EPI_ISL_1380487	Telangana	2020-12-26	20A	B.1.36.29	GH	Others	NA
EPI_ISL_1380488	Telangana	2020-12-26	20A	B.1.36.29	GH	Others	NA
EPI_ISL_1380489	Telangana	2020-12-26	20A	B.1.36.29	GH	Others	NA
EPI_ISL_1380491	Andhra_Pradesh	2020-12-29	20A	B.1.36.29	GH	Others	NA
EPI_ISL_1380492	Andhra_Pradesh	2020-12-29	20A	B.1.36.29	GH	Others	NA
EPI_ISL_1380495	Telangana	2020-12-30	20A	B.1.36.29	GH	Others	NA
EPI_ISL_1380496	Telangana	2020-12-30	20A	B.1.36.29	GH	Others	NA
EPI_ISL_1380498	Telangana	2020-12-30	20A	B.1.36.29	GH	Others	NA
EPI_ISL_1419200	West_Bengal	2020-09-03	20B	B.1.1	GR	Others	NA
EPI_ISL_1419201	West_Bengal	2020-09-02	20A	B.1.540	G	Others	NA
EPI_ISL_1419205	West_Bengal	2021-01-10	20B	B.1.1.416	GR	Others	NA
EPI_ISL_1419206	West_Bengal	2021-01-11	20A	B.1.36.8	GH	Others	NA
EPI_ISL_1419207	West_Bengal	2021-01-11	20B	B.1.1	GR	Others	NA
EPI_ISL_1419208	West_Bengal	2021-01-12	20A	B.1.36	GH	Others	NA
EPI_ISL_1419209	West_Bengal	2021-01-12	20B	B.1.1.216	GR	Others	NA
EPI_ISL_1419210	West_Bengal	2021-01-13	20B	B.1.1	GR	Others	NA
EPI_ISL_1419211	West_Bengal	2021-01-12	20B	B.1.1	GR	Others	NA
EPI_ISL_1419212	West_Bengal	2021-01-14	20A	B.1.36	GH	Others	NA
EPI_ISL_1419213	West_Bengal	2021-01-15	20B	B.1.1	GR	Others	NA
EPI_ISL_1419215	West_Bengal	2021-01-16	20B	B.1.1	GR	Others	NA
EPI_ISL_1419216	West_Bengal	2021-01-16	20B	B.1.1	GR	Others	NA
EPI_ISL_1419217	West_Bengal	2021-01-22	20B	B.1.1	GR	Others	NA
EPI_ISL_1419218	West_Bengal	2021-01-25	20A	B.1.36	GH	Others	NA
EPI_ISL_1419222	West_Bengal	2021-01-02	20A	B.1	G	Others	NA
EPI_ISL_1419223	West_Bengal	2021-01-02	20B	B.1.1.216	GR	Others	NA
EPI_ISL_1419224	West_Bengal	2021-01-02	20B	B.1.1	GR	Others	NA
EPI_ISL_1419225	West_Bengal	2021-01-02	20B	B.1.1	GR	Others	NA
EPI_ISL_1419226	West_Bengal	2020-12-17	20B	B.1.1	GR	Others	NA
EPI_ISL_1419227	West_Bengal	2020-12-16	20B	B.1.1.216	GR	Others	NA
EPI_ISL_1419228	West_Bengal	2020-11-30	20A	B.1.36	GH	Others	NA
EPI_ISL_1708370	Karnataka	2020-09-27	20A	B.1.36	GH	Others	NA
EPI_ISL_1708371	Karnataka	2020-09-27	20B	B.1.1.194	GR	Others	NA
EPI_ISL_1708372	Karnataka	2020-09-28	20B	B.1.1	GR	Others	NA
EPI_ISL_1708373	Karnataka	2020-09-28	20B	B.1.1	GR	Others	NA
EPI_ISL_1708374	Karnataka	2020-09-28	20B	B.1.1	GR	Others	NA
EPI_ISL_1708375	Karnataka	2020-09-28	20B	B.1.1.46	GR	Others	NA
EPI_ISL_1708376	Karnataka	2020-09-28	20A	B.1.36.29	GH	Others	NA
EPI_ISL_1708377	Karnataka	2020-09-28	20B	B.1.1	GR	Others	NA
EPI_ISL_1708378	Karnataka	2020-09-29	20B	B.1.1	GR	Others	NA
EPI_ISL_1708379	Karnataka	2020-09-29	20B	B.1.1	GR	Others	NA
EPI_ISL_1708380	Karnataka	2020-09-29	20A	B.1.36.29	GH	Others	NA
EPI_ISL_1708400	Karnataka	2020-10-08	20B	B.1.1.291	GR	Others	NA
EPI_ISL_1708401	Karnataka	2020-10-08	20A	B.1.36.29	GH	Others	NA
EPI_ISL_1708402	Karnataka	2020-10-10	20B	B.1.1	GR	Others	NA
EPI_ISL_1708403	Karnataka	2020-10-12	20B	B.1.1	GR	Others	NA
EPI_ISL_1708404	Karnataka	2020-10-13	20A	B.1.36.29	GH	Others	NA
EPI_ISL_1708405	Karnataka	2020-10-13	20B	B.1.1	GR	Others	NA
EPI_ISL_1708406	Karnataka	2020-10-13	20B	B.1.1.46	GR	Others	NA
EPI_ISL_1708407	Karnataka	2020-10-13	20A	B.1.36.29	GH	Others	NA
EPI_ISL_1708408	Karnataka	2020-10-13	20A	B.1.36.29	GH	Others	NA
EPI_ISL_1708409	Karnataka	2020-10-15	20A	B.1.36.29	GH	Others	NA
EPI_ISL_1708410	Karnataka	2020-10-17	20A	B.1.36.29	GH	Others	NA
EPI_ISL_1708411	Karnataka	2020-10-20	20B	B.1.1.46	GR	Others	NA
EPI_ISL_1708412	Karnataka	2020-10-20	20B	B.1.1	GR	Others	NA
EPI_ISL_1708414	Karnataka	2020-10-28	20A	B.1.36.29	GH	Others	NA
EPI_ISL_1708415	Karnataka	2020-10-29	20A	B.1.36.29	GH	Others	NA
EPI_ISL_1708416	Karnataka	2020-11-01	20B	B.1.1	GR	Others	NA
EPI_ISL_1708417	Karnataka	2020-11-03	20A	B.1.36.29	GH	Others	NA
EPI_ISL_1708418	Karnataka	2020-11-03	20B	B.1.1	GR	Others	NA
EPI_ISL_1708419	Karnataka	2020-11-04	20B	B.1.1	GR	Others	NA
EPI_ISL_1708420	Karnataka	2020-11-04	20B	B.1.1	GR	Others	NA
EPI_ISL_1708421	Karnataka	2020-11-04	20B	B.1.1	GR	Others	NA
EPI_ISL_1708422	Karnataka	2020-11-05	20B	B.1.1.306	GR	Others	NA
EPI_ISL_1708423	Karnataka	2020-11-08	20A	B.1.36.29	GH	Others	NA
EPI_ISL_1708424	Karnataka	2020-11-08	20A	B.1.36.29	GH	Others	NA
EPI_ISL_1708425	Karnataka	2020-11-08	20A	B.1.36.29	GH	Others	NA
EPI_ISL_1708426	Karnataka	2020-11-09	20B	B.1.1	GR	Others	NA
EPI_ISL_1708427	Karnataka	2020-11-09	20B	B.1.1.46	GR	Others	NA
EPI_ISL_1708428	Karnataka	2020-11-12	20A	B.1.36.29	GH	Others	NA
EPI_ISL_1708429	Karnataka	2020-11-18	20A	B.1.36.29	GH	Others	NA
EPI_ISL_1708430	Karnataka	2020-11-18	20A	B.1.36.29	GH	Others	NA
EPI_ISL_1708431	Karnataka	2020-12-02	20A	B.1.404	G	Others	NA
EPI_ISL_1708432	Karnataka	2020-12-05	20A	B.1.36.29	GH	Others	NA
EPI_ISL_1708433	Karnataka	2020-12-06	20A	B.1.36.29	GH	Others	NA
EPI_ISL_1708434	Karnataka	2020-12-09	20A	B.1.36	GH	Others	NA
EPI_ISL_1708435	Karnataka	2020-12-10	20A	B.1.36.29	GH	Others	NA
EPI_ISL_1708436	Karnataka	2020-12-12	20A	B.1.36.29	GH	Others	NA
EPI_ISL_1708437	Karnataka	2020-12-12	20A	B.1.36.29	GH	Others	NA
EPI_ISL_1708438	Karnataka	2020-12-13	20A	B.1.36	GH	Others	NA
EPI_ISL_1708439	Karnataka	2020-12-14	20A	B.1.36.29	GH	Others	NA
EPI_ISL_1708440	Karnataka	2020-12-14	20A	B.1.36.29	GH	Others	NA
EPI_ISL_1708441	Karnataka	2020-12-14	20A	B.1.36.29	GH	Others	NA
EPI_ISL_1708442	Karnataka	2020-12-15	20B	B.1.1.194	GR	Others	NA
EPI_ISL_1708443	Karnataka	2020-12-15	20B	B.1.1.194	GR	Others	NA
EPI_ISL_1708444	Karnataka	2020-12-19	20A	B.1.36.29	GH	Others	NA
EPI_ISL_1708446	Andhra_Pradesh	2020-12-28	20A	B.1.36.39	GH	Others	NA
EPI_ISL_1708447	Karnataka	2020-12-30	20A	B.1.36.29	GH	Others	NA
EPI_ISL_1708448	Karnataka	2020-12-31	20B	B.1.1.354	GR	Others	NA
EPI_ISL_1708449	Tamil_Nadu	2021-01-01	20A	B.1.36.29	GH	Others	NA
EPI_ISL_1708450	Tamil_Nadu	2021-01-01	20B	B.1.1.354	GR	Others	NA
EPI_ISL_1708451	Tamil_Nadu	2021-01-01	20B	B.1.1.354	GR	Others	NA
EPI_ISL_1708452	Tamil_Nadu	2021-01-01	20B	B.1.1.354	GR	Others	NA
EPI_ISL_1708453	Tamil_Nadu	2021-01-01	20B	B.1.1.354	GR	Others	NA
EPI_ISL_1708454	Tamil_Nadu	2021-01-01	20A	B.1.36.29	GH	Others	NA
EPI_ISL_1708455	Tamil_Nadu	2021-01-01	20A	B.1.36.29	GH	Others	NA
EPI_ISL_1708456	Tamil_Nadu	2021-01-01	20B	R.1	GR	Others	NA
EPI_ISL_1708457	Tamil_Nadu	2021-01-01	20A	B.1.524	G	Others	NA
EPI_ISL_1708458	Tamil_Nadu	2021-01-01	20A	B.1.524	G	Others	NA
EPI_ISL_1708459	Tamil_Nadu	2021-01-01	20A	B.1.36.29	GH	Others	NA
EPI_ISL_1708460	Tamil_Nadu	2021-01-01	20B	B.1.1	GR	Others	NA
EPI_ISL_1708461	Tamil_Nadu	2021-01-01	20B	B.1.1	GR	Others	NA
EPI_ISL_1708462	Andhra_Pradesh	2021-01-05	20A	B.1.36.29	GH	Others	NA
EPI_ISL_1708463	Tamil_Nadu	2021-01-05	20B	B.1.1	GR	Others	NA
EPI_ISL_1708464	Tamil_Nadu	2021-01-05	20B	B.1.1	GR	Others	NA
EPI_ISL_1708465	Tamil_Nadu	2021-01-20	20I/501Y.V1	B.1.1.7	GR	Alpha	VOC
EPI_ISL_1708466	Tamil_Nadu	2021-01-20	20I/501Y.V1	B.1.1.7	GR	Alpha	VOC
EPI_ISL_1708467	Tamil_Nadu	2021-01-20	20I/501Y.V1	B.1.1.7	GR	Alpha	VOC
EPI_ISL_1708468	Tamil_Nadu	2021-01-20	20I/501Y.V1	B.1.1.7	GR	Alpha	VOC
EPI_ISL_508450	West_Bengal	2020-05-03	20A	B.1	G	Others	NA
EPI_ISL_508452	West_Bengal	2020-05-03	20A	B.1	G	Others	NA
EPI_ISL_508453	West_Bengal	2020-05-24	20A	B.1	G	Others	NA
EPI_ISL_508454	West_Bengal	2020-05-24	20A	B.1.36	GH	Others	NA
EPI_ISL_508456	West_Bengal	2020-05-24	20A	B.1.210	G	Others	NA
EPI_ISL_508457	West_Bengal	2020-05-28	20A	B.1	G	Others	NA
EPI_ISL_508460	West_Bengal	2020-05-25	20B	B.1.1.306	GR	Others	NA
EPI_ISL_508463	West_Bengal	2020-05-26	20B	B.1.1.306	GR	Others	NA
EPI_ISL_508464	West_Bengal	2020-05-20	20B	B.1.1.306	GR	Others	NA
EPI_ISL_508465	West_Bengal	2020-05-20	20B	B.1.1.306	GR	Others	NA
EPI_ISL_508468	West_Bengal	2020-05-26	20A	B.1.210	G	Others	NA
EPI_ISL_508469	West_Bengal	2020-05-20	20B	B.1.1.306	GR	Others	NA
EPI_ISL_508471	West_Bengal	2020-05-26	20B	B.1.1.306	GR	Others	NA
EPI_ISL_508475	West_Bengal	2020-05-26	20A	B.1.210	G	Others	NA
EPI_ISL_508481	West_Bengal	2020-05-25	20B	B.1.1.306	GR	Others	NA
EPI_ISL_508482	West_Bengal	2020-06-02	20A	B.1.210	G	Others	NA
EPI_ISL_508483	West_Bengal	2020-06-03	20A	B.1	G	Others	NA
EPI_ISL_508487	West_Bengal	2020-06-10	20A	B.1.540	G	Others	NA
EPI_ISL_508489	Haryana	2020-06-12	20A	B.1.36	GH	Others	NA
EPI_ISL_508490	Haryana	2020-06-17	20B	B.1.1.216	GR	Others	NA
EPI_ISL_508491	Haryana	2020-06-17	20A	B.1.36	GH	Others	NA
EPI_ISL_508492	Haryana	2020-06-17	20A	B.1.36	GH	Others	NA
EPI_ISL_508493	Haryana	2020-06-17	20A	B.1.36	GH	Others	NA
EPI_ISL_508494	Haryana	2020-06-17	20A	B.1.36	GH	Others	NA
EPI_ISL_508495	Delhi	2020-06-17	20A	B.1.36	GH	Others	NA
EPI_ISL_508496	Haryana	2020-06-14	20A	B.1.36	GH	Others	NA
EPI_ISL_508497	Haryana	2020-06-17	20A	B.1.36	GH	Others	NA
EPI_ISL_508498	Haryana	2020-06-19	19A	B.6	O	Others	NA
EPI_ISL_508499	Haryana	2020-06-19	20A	B.1.36	GH	Others	NA
EPI_ISL_516940	Uttar_Pradesh	2020-04-02	19A	B.6	O	Others	NA
EPI_ISL_516942	Uttar_Pradesh	2020-04-02	19A	B.6	O	Others	NA
EPI_ISL_516943	Uttar_Pradesh	2020-04-02	19A	B.6	O	Others	NA
EPI_ISL_516946	Uttar_Pradesh	2020-03-11	20B	B.1.1	GR	Others	NA
EPI_ISL_516948	Uttar_Pradesh	2020-03-18	20A	B.1.557	G	Others	NA
EPI_ISL_516949	Uttar_Pradesh	2020-05-14	20A	B.1.210	G	Others	NA
EPI_ISL_516969	Uttar_Pradesh	2020-03-28	20A	B.1	GH	Others	NA
EPI_ISL_516974	Uttar_Pradesh	2020-03-24	20B	B.1.1.306	GR	Others	NA
EPI_ISL_516976	Uttar_Pradesh	2020-05-25	20A	B.1.36	GH	Others	NA
EPI_ISL_516977	Uttar_Pradesh	2020-05-26	20A	B.1.36.8	GH	Others	NA
EPI_ISL_516980	Uttar_Pradesh	2020-05-25	20A	B.1.36	GH	Others	NA
EPI_ISL_516981	Uttar_Pradesh	2020-05-25	20A	B.1.36.8	GH	Others	NA
EPI_ISL_516982	Uttar_Pradesh	2020-05-25	20A	B.1.36	GH	Others	NA
EPI_ISL_516983	Uttar_Pradesh	2020-05-25	20A	B.1.36	GH	Others	NA
EPI_ISL_516984	Uttar_Pradesh	2020-05-25	20A	B.1.36	GH	Others	NA
EPI_ISL_516986	Uttar_Pradesh	2020-05-24	20A	B.1.36	GH	Others	NA
EPI_ISL_539616	Telangana	2020-08-10	20B	B.1.1.326	GR	Others	NA
EPI_ISL_539617	Telangana	2020-08-14	20B	B.1.1.326	GR	Others	NA
EPI_ISL_636780	Delhi	2020-08-06	20B	B.1.1.306	GR	Others	NA
EPI_ISL_636781	Uttarakhand	2020-07-26	20A	B.1.36	GH	Others	NA
EPI_ISL_636787	Delhi	2020-08-06	20A	B.1.36	GH	Others	NA
EPI_ISL_636788	Delhi	2020-08-06	20B	B.1.1.306	GR	Others	NA
EPI_ISL_636795	Delhi	2020-08-05	20B	B.1.1.306	GR	Others	NA
EPI_ISL_700200	Maharashtra	2020-08-28	20B	B.1.1.326	GR	Others	NA
EPI_ISL_700201	Maharashtra	2020-08-28	20B	B.1.1.306	GR	Others	NA
EPI_ISL_700202	Maharashtra	2020-08-29	20A	B.1	GH	Others	NA
EPI_ISL_700204	Maharashtra	2020-08-29	20B	B.1.1.216	GR	Others	NA
EPI_ISL_700205	Maharashtra	2020-08-29	20B	B.1.1.306	GR	Others	NA
EPI_ISL_700206	Maharashtra	2020-08-29	20A	B.1	G	Others	NA
EPI_ISL_857395	NS	2021-01-11	20A	B.1.36	GH	Others	NA
EPI_ISL_910031	Telangana	2020-08-26	20B	B.1.1.326	GR	Others	NA
EPI_ISL_910032	Telangana	2020-08-26	20B	B.1.1.326	GR	Others	NA
EPI_ISL_910033	Telangana	2020-08-26	20B	B.1.1.216	GR	Others	NA
EPI_ISL_910034	Telangana	2020-08-26	20B	B.1.1.306	GR	Others	NA
EPI_ISL_910035	Telangana	2020-08-26	20B	B.1.1.306	GR	Others	NA
EPI_ISL_910036	Telangana	2020-08-26	20C	B.1.369	GH	Others	NA
EPI_ISL_910037	Telangana	2020-08-27	20B	B.1.1.326	GR	Others	NA
EPI_ISL_910038	Telangana	2020-08-27	20B	B.1.1.326	GR	Others	NA
EPI_ISL_910039	Telangana	2020-08-27	20B	B.1.1.326	GR	Others	NA
EPI_ISL_910040	Telangana	2020-08-27	20B	B.1.1.326	GR	Others	NA
EPI_ISL_910041	Telangana	2020-08-27	20B	B.1.1.306	GR	Others	NA
EPI_ISL_910042	Telangana	2020-08-26	20B	B.1.1.326	GR	Others	NA
EPI_ISL_910043	Telangana	2020-08-27	20B	B.1.1.306	GR	Others	NA
EPI_ISL_910044	Telangana	2020-08-27	20B	B.1.1.326	GR	Others	NA
EPI_ISL_910045	Telangana	2020-08-27	20B	B.1.1.326	GR	Others	NA
EPI_ISL_910046	Telangana	2020-08-27	20B	B.1.1.326	GR	Others	NA
EPI_ISL_910047	Telangana	2020-08-27	20A	B.1.36.8	GH	Others	NA
EPI_ISL_910048	Telangana	2020-08-27	20B	B.1.1.306	GR	Others	NA
EPI_ISL_910049	Telangana	2020-08-27	20A	B.1.36.29	GH	Others	NA
EPI_ISL_1192080	Andhra_Pradesh	2020-08	20A	B.1.36.29	GH	Others	NA
EPI_ISL_1192081	Andhra_Pradesh	2020-08	20A	B.1.36.29	GH	Others	NA
EPI_ISL_1192082	Andhra_Pradesh	2020-06	20A	B.1.36.29	GH	Others	NA
EPI_ISL_1192083	Andhra_Pradesh	2020-06	20A	B.1.36.29	GH	Others	NA
EPI_ISL_1192084	Andhra_Pradesh	2020-08	20A	B.1.36.29	GH	Others	NA
EPI_ISL_1192085	Telangana	2020-05	20A	B.1.36.29	GH	Others	NA
EPI_ISL_1192086	Telangana	2020-07	20A	B.1.548	GH	Others	NA
EPI_ISL_1192087	Telangana	2020-07	20A	B.1.36.29	GH	Others	NA
EPI_ISL_1192088	Telangana	2020-07	20A	B.1.36.29	GH	Others	NA
EPI_ISL_1192089	Telangana	2020-08	20A	B.1.36.29	GH	Others	NA
EPI_ISL_1192090	Telangana	2020-09	20A	B.1.36.29	GH	Others	NA
EPI_ISL_1192091	Telangana	2020-04	20B	B.1.1.326	GR	Others	NA
EPI_ISL_1192092	Himachal_Pradesh	2020-08	20A	B.1.36	GH	Others	NA
EPI_ISL_1192093	Andhra_Pradesh	2020-08	20B	B.1.1	GR	Others	NA
EPI_ISL_1192094	Andhra_Pradesh	2020-06	20B	B.1.1.306	GR	Others	NA
EPI_ISL_1192095	Andhra_Pradesh	2020	20A	B.1	G	Others	NA
EPI_ISL_1192096	Telangana	2020-04	20B	B.1.1.326	GR	Others	NA
EPI_ISL_1192097	Telangana	2020-07	20A	B.1	GH	Others	NA
EPI_ISL_1192098	Himachal_Pradesh	2020-08	20B	B.1.1	GR	Others	NA
EPI_ISL_1192099	Himachal_Pradesh	2020-08	20B	B.1.1	GR	Others	NA
EPI_ISL_1380401	Telangana	2020-12-13	20A	B.1	G	Others	NA
EPI_ISL_1380402	Telangana	2020-12-13	20A	B.1.538	G	Others	NA
EPI_ISL_1380403	Telangana	2020-12-15	20A	B.1.36.29	GH	Others	NA
EPI_ISL_1380404	Telangana	2020-12-15	20A	B.1.36.29	GH	Others	NA
EPI_ISL_1380405	Telangana	2020-12-15	20B	B.1.1.306	GR	Others	NA
EPI_ISL_1380406	Telangana	2020-12-15	20A	B.1.36.29	GH	Others	NA
EPI_ISL_1380407	Telangana	2020-12-15	20A	B.1.36.29	GH	Others	NA
EPI_ISL_1380408	Telangana	2020-12-17	20A	B.1.36.29	GH	Others	NA
EPI_ISL_1380409	Telangana	2020-12-17	20A	B.1.36.29	GH	Others	NA
EPI_ISL_1380410	Telangana	2020-12-17	20A	B.1.36.29	GH	Others	NA
EPI_ISL_1380411	Telangana	2020-12-17	20A	B.1.36.29	GH	Others	NA
EPI_ISL_1380412	Telangana	2020-12-17	20A	B.1.36.29	GH	Others	NA
EPI_ISL_1380413	Telangana	2020-12-17	20A	B.1	G	Others	NA
EPI_ISL_1380414	Telangana	2020-12-17	20A	B.1	G	Others	NA
EPI_ISL_1380420	Telangana	2020-12-19	20B	B.1.1.306	GR	Others	NA
EPI_ISL_1380421	Telangana	2020-12-19	20A	B.1.36.29	GH	Others	NA
EPI_ISL_1380422	Telangana	2020-12-19	20B	B.1.1.216	GR	Others	NA
EPI_ISL_1380423	Telangana	2020-12-19	20A	B.1.36.29	GH	Others	NA
EPI_ISL_1419230	West_Bengal	2020-12-01	20B	B.1.1	GR	Others	NA
EPI_ISL_1419232	West_Bengal	2020-12-01	20A	B.1.36	GH	Others	NA
EPI_ISL_1419234	West_Bengal	2021-02-01	20B	B.1.1.216	GR	Others	NA
EPI_ISL_1419235	West_Bengal	2021-02-02	20B	B.1.1	GR	Others	NA
EPI_ISL_1419236	West_Bengal	2020-12-17	20B	B.1.1.25	GR	Others	NA
EPI_ISL_1419239	West_Bengal	2020-12-17	20A	B.1	GV	Others	NA
EPI_ISL_1419240	West_Bengal	2020-12-18	20B	B.1.1	GR	Others	NA
EPI_ISL_1419241	West_Bengal	2020-12-18	20A	B.1	G	Others	NA
EPI_ISL_1419243	West_Bengal	2020-12-01	20A	B.1.36	GH	Others	NA
EPI_ISL_1419244	West_Bengal	2020-12-01	20B	B.1.1.216	GR	Others	NA
EPI_ISL_1419246	West_Bengal	2020-12-01	20A	B.1.2	G	Others	NA
EPI_ISL_1419247	West_Bengal	2020-12-13	20B	B.1.1.216	GR	Others	NA
EPI_ISL_1419248	West_Bengal	2020-12-13	20B	B.1.1	GR	Others	NA
EPI_ISL_1419249	West_Bengal	2020-12-12	20B	B.1.1.216	GR	Others	NA
EPI_ISL_1419260	West_Bengal	2020-09-29	20A	B.1	G	Others	NA
EPI_ISL_1419261	West_Bengal	2020-10-01	20A	B.1	G	Others	NA
EPI_ISL_1419262	West_Bengal	2020-10-01	20B	B.1.1.216	GR	Others	NA
EPI_ISL_1419263	West_Bengal	2020-10-01	20A	B.1	G	Others	NA
EPI_ISL_1419264	West_Bengal	2020-10-01	20B	B.1.1	GR	Others	NA
EPI_ISL_1419265	West_Bengal	2020-10-01	20B	B.1.1	GR	Others	NA
EPI_ISL_1419266	West_Bengal	2020-10-01	20A	B.1.540	G	Others	NA
EPI_ISL_1419269	West_Bengal	2020-10-01	20A	B.1	G	Others	NA
EPI_ISL_1543989	Maharashtra	2021-03-02	20A	B.1.36.29	GH	Others	NA
EPI_ISL_1543991	Maharashtra	2021-02-22	20A	B.1.36.29	GH	Others	NA
EPI_ISL_1543992	Maharashtra	2021-02-22	20A	B.1.617.1	G	Kappa	VOI
EPI_ISL_1543993	Maharashtra	2021-02-23	20A	B.1.617.1	G	Kappa	VOI
EPI_ISL_1543994	Maharashtra	2021-02-23	20A	B.1.617.1	G	Kappa	VOI
EPI_ISL_1543995	Maharashtra	2021-02-23	20A	B.1.617.1	G	Kappa	VOI
EPI_ISL_1543996	Maharashtra	2021-02-23	20B	B.1.1.306	GR	Others	NA
EPI_ISL_1543997	Maharashtra	2021-02-24	20A	B.1.617.1	G	Kappa	VOI
EPI_ISL_1543998	Maharashtra	2021-02-24	20B	B.1.1.306	GR	Others	NA
EPI_ISL_1543999	Maharashtra	2021-02-24	20A	B.1.36.29	GH	Others	NA
EPI_ISL_1708350	Karnataka	2020-09-17	20B	B.1.1.306	GR	Others	NA
EPI_ISL_1708351	Karnataka	2020-09-17	20B	B.1.1	GR	Others	NA
EPI_ISL_1708352	Karnataka	2020-09-17	20A	B.1.36.29	GH	Others	NA
EPI_ISL_1708353	Karnataka	2020-09-20	20B	B.1.1	GR	Others	NA
EPI_ISL_1708354	Karnataka	2020-09-21	20B	B.1.1	GR	Others	NA
EPI_ISL_1708355	Karnataka	2020-09-21	20B	B.1.1	GR	Others	NA
EPI_ISL_1708356	Karnataka	2020-09-21	20B	B.1.1	GR	Others	NA
EPI_ISL_1708357	Karnataka	2020-09-22	20B	B.1.1	GR	Others	NA
EPI_ISL_1708358	Karnataka	2020-09-23	20B	B.1.1.326	GR	Others	NA
EPI_ISL_1708359	Karnataka	2020-09-24	20B	B.1.1	GR	Others	NA
EPI_ISL_1708360	Karnataka	2020-09-24	20A	B.1.36.29	GH	Others	NA
EPI_ISL_1708361	Karnataka	2020-09-24	20A	B.1.36.29	GH	Others	NA
EPI_ISL_1708362	Karnataka	2020-09-26	20B	B.1.1	GR	Others	NA
EPI_ISL_1708363	Karnataka	2020-09-26	20B	B.1.1.46	GR	Others	NA
EPI_ISL_1708364	Karnataka	2020-09-26	20B	B.1.1.46	GR	Others	NA
EPI_ISL_1708365	Karnataka	2020-09-27	20A	B.1.36	GH	Others	NA
EPI_ISL_1708366	Karnataka	2020-09-27	20A	B.1.36	GH	Others	NA
EPI_ISL_1708367	Karnataka	2020-09-27	20B	B.1.1.46	GR	Others	NA
EPI_ISL_1708368	Karnataka	2020-09-27	20B	B.1	GR	Others	NA
EPI_ISL_1708369	Karnataka	2020-09-27	20A	B.1.36	GH	Others	NA
EPI_ISL_1708381	Karnataka	2020-09-30	20A	B.1.36	GH	Others	NA
EPI_ISL_1708382	Karnataka	2020-10-01	20B	B.1.1.46	GR	Others	NA
EPI_ISL_1708383	Karnataka	2020-10-03	20A	B.1.36	GH	Others	NA
EPI_ISL_1708384	Karnataka	2020-10-03	20B	B.1.1	GR	Others	NA
EPI_ISL_1708385	Karnataka	2020-10-03	20B	B.1.1.231	GR	Others	NA
EPI_ISL_1708386	Karnataka	2020-10-05	20B	B.1.1	GR	Others	NA
EPI_ISL_1708387	Karnataka	2020-10-05	20B	B.1.1	GR	Others	NA
EPI_ISL_1708388	Karnataka	2020-10-06	20A	B.1.36.29	GH	Others	NA
EPI_ISL_1708389	Karnataka	2020-10-06	20B	B.1.1.46	GR	Others	NA
EPI_ISL_1708390	Karnataka	2020-10-06	20B	B.1.1	GR	Others	NA
EPI_ISL_1708391	Karnataka	2020-10-06	20A	B.1.36.29	GH	Others	NA
EPI_ISL_1708392	Karnataka	2020-10-06	20B	B.1.1.46	GR	Others	NA
EPI_ISL_1708393	Karnataka	2020-10-07	20B	B.1.1.46	GR	Others	NA
EPI_ISL_1708394	Karnataka	2020-10-07	20B	B.1.1	GR	Others	NA
EPI_ISL_1708395	Karnataka	2020-10-08	20A	B.1.36.29	GH	Others	NA
EPI_ISL_1708396	Karnataka	2020-10-08	20B	B.1.1.194	GR	Others	NA
EPI_ISL_1708397	Karnataka	2020-10-08	20B	B.1.1.194	GR	Others	NA
EPI_ISL_1708398	Karnataka	2020-10-08	20B	B.1.1.354	GR	Others	NA
EPI_ISL_1708399	Karnataka	2020-10-08	20B	B.1.1.306	GR	Others	NA
EPI_ISL_413522	Maharashtra	2020-01-27	19A	B	L	Others	NA
EPI_ISL_413523	Maharashtra	2020-01-31	19B	B	S	Others	NA
EPI_ISL_437539	West_Bengal	2020-04-06	20A	B.1	G	Others	NA
EPI_ISL_539618	Telangana	2020-08-16	20B	B.1.1.326	GR	Others	NA
EPI_ISL_539619	Telangana	2020-08-19	20B	B.1.1.326	GR	Others	NA
EPI_ISL_539620	Telangana	2020-08-09	20B	B.1.1.326	GR	Others	NA
EPI_ISL_539621	Telangana	2020-08-09	20B	B.1.1.326	GR	Others	NA
EPI_ISL_539622	Telangana	2020-08-09	20B	B.1.1.326	GR	Others	NA
EPI_ISL_539623	Telangana	2020-08-09	20B	B.1.1.326	GR	Others	NA
EPI_ISL_539624	Telangana	2020-08-09	20B	B.1.1.326	GR	Others	NA
EPI_ISL_539625	Telangana	2020-08-09	20B	B.1.1.326	GR	Others	NA
EPI_ISL_539626	Telangana	2020-08-09	20B	B.1.1.326	GR	Others	NA
EPI_ISL_539627	Telangana	2020-08-14	20B	B.1.1.326	GR	Others	NA
EPI_ISL_539628	Telangana	2020-08-12	20B	B.1.1.326	GR	Others	NA
EPI_ISL_539629	Telangana	2020-08-14	20B	B.1.1.326	GR	Others	NA
EPI_ISL_539630	Telangana	2020-08-09	20B	B.1.1.326	GR	Others	NA
EPI_ISL_539631	Telangana	2020-08-13	20B	B.1.1.326	GR	Others	NA
EPI_ISL_539632	Telangana	2020-08-13	20B	B.1.1.326	GR	Others	NA
EPI_ISL_539633	Telangana	2020-08-12	20B	B.1.1.326	GR	Others	NA
EPI_ISL_539634	Telangana	2020-08-12	20B	B.1.1.326	GR	Others	NA
EPI_ISL_539635	Telangana	2020-08-13	20B	B.1.1.326	GR	Others	NA
EPI_ISL_539636	Telangana	2020-08-13	20B	B.1.1.326	GR	Others	NA
EPI_ISL_539637	Telangana	2020-08-13	20B	B.1.1.326	GR	Others	NA
EPI_ISL_539638	Telangana	2020-08-12	20B	B.1.1.326	GR	Others	NA
EPI_ISL_539639	Telangana	2020-08-15	20B	B.1.1.326	GR	Others	NA
EPI_ISL_539640	Telangana	2020-08-14	20B	B.1.1.326	GR	Others	NA
EPI_ISL_539641	Telangana	2020-08-12	20B	B.1.1.326	GR	Others	NA
EPI_ISL_539642	Telangana	2020-08-19	20B	B.1.1.326	GR	Others	NA
EPI_ISL_539643	Telangana	2020-08-09	20B	B.1.1.326	GR	Others	NA
EPI_ISL_539644	Telangana	2020-08-09	20B	B.1.1.326	GR	Others	NA
EPI_ISL_539645	Telangana	2020-08-10	20B	B.1.1.326	GR	Others	NA
EPI_ISL_539646	Telangana	2020-08-10	20B	B.1.1.326	GR	Others	NA
EPI_ISL_539647	Telangana	2020-08-12	20B	B.1.1.326	GR	Others	NA
EPI_ISL_539648	Telangana	2020-08-09	20B	B.1.1.326	GR	Others	NA
EPI_ISL_539649	Telangana	2020-08-12	20B	B.1.1.326	GR	Others	NA
EPI_ISL_636742	Uttarakhand	2020-08-09	20A	B.1.36	GH	Others	NA
EPI_ISL_636743	Uttarakhand	2020-08-09	20A	B.1.36	GH	Others	NA
EPI_ISL_636746	Uttarakhand	2020-08-09	20A	B.1.36	GH	Others	NA
EPI_ISL_636747	Uttarakhand	2020-08-09	20A	B.1.36	GH	Others	NA
EPI_ISL_636750	Uttarakhand	2020-08-09	20A	B.1.36	GH	Others	NA
EPI_ISL_636752	Delhi	2020-08-02	20A	B.1.36	GH	Others	NA
EPI_ISL_636753	Uttarakhand	2020-08-09	20A	B.1.36	GH	Others	NA
EPI_ISL_636754	Delhi	2020-08-14	20B	B.1.1.216	GR	Others	NA
EPI_ISL_636755	Delhi	2020-08-14	20A	B.1.36	GH	Others	NA
EPI_ISL_636756	Uttarakhand	2020-08-09	20A	B.1.36	GH	Others	NA
EPI_ISL_636757	Delhi	2020-08-14	20A	B.1.36	GH	Others	NA
EPI_ISL_636762	Delhi	2020-08-14	20A	B.1.36	GH	Others	NA
EPI_ISL_636766	Delhi	2020-08-06	20A	B.1.36.22	GH	Others	NA
EPI_ISL_636770	Delhi	2020-07-27	20A	B.1.36	GH	Others	NA
EPI_ISL_636774	Delhi	2020-08-06	20A	B.1.36	GH	Others	NA
EPI_ISL_636776	Delhi	2020-08-08	20A	B.1.36	GH	Others	NA
EPI_ISL_636777	Delhi	2020-08-16	20A	B.1.36	GH	Others	NA
EPI_ISL_700207	Maharashtra	2020-08-31	20B	B.1.1.306	GR	Others	NA
EPI_ISL_700208	Maharashtra	2020-08-31	20A	B.1.210	G	Others	NA
EPI_ISL_700211	Maharashtra	2020-08-31	20B	B.1.1.306	GR	Others	NA
EPI_ISL_700212	Maharashtra	2020-08-31	20B	B.1.1.306	GR	Others	NA
EPI_ISL_700214	Maharashtra	2020-08-31	20B	B.1.1.306	GR	Others	NA
EPI_ISL_700215	Maharashtra	2020-08-31	20B	B.1.1.306	GR	Others	NA
EPI_ISL_700217	Maharashtra	2020-08-31	20B	B.1.1.216	GR	Others	NA
EPI_ISL_700218	Maharashtra	2020-09-01	20A	B.1.210	G	Others	NA
EPI_ISL_700221	Maharashtra	2020-09-02	20B	B.1.1.101	GR	Others	NA
EPI_ISL_700223	Maharashtra	2020-09-02	20B	B.1.1.306	GR	Others	NA
EPI_ISL_700224	Maharashtra	2020-09-02	20B	B.1.1.306	GR	Others	NA
EPI_ISL_700225	Maharashtra	2020-09-03	20B	B.1.1.306	GR	Others	NA
EPI_ISL_700228	Maharashtra	2020-09-04	20B	B.1.1.306	GR	Others	NA
EPI_ISL_700229	Maharashtra	2020-09-04	20A	B.1.36	GH	Others	NA
EPI_ISL_700231	Maharashtra	2020-09-04	20A	B.1.210	G	Others	NA
EPI_ISL_700232	Maharashtra	2020-09-04	20A	B.1.210	G	Others	NA
EPI_ISL_700233	Maharashtra	2020-09-05	20A	B.1.36	GH	Others	NA
EPI_ISL_700234	Maharashtra	2020-09-05	20A	B.1.210	G	Others	NA
EPI_ISL_700236	Maharashtra	2020-09-07	20B	B.1.1.306	GR	Others	NA
EPI_ISL_700237	Maharashtra	2020-09-07	20B	B.1.1.306	GR	Others	NA
EPI_ISL_700238	Maharashtra	2020-09-08	20B	B.1.1.306	GR	Others	NA
EPI_ISL_700239	Maharashtra	2020-09-08	20A	B.1	GH	Others	NA
EPI_ISL_700241	Maharashtra	2020-09-08	20A	B.1.36	GH	Others	NA
EPI_ISL_700244	Maharashtra	2020-09-09	20B	B.1.1.306	GR	Others	NA
EPI_ISL_700246	Maharashtra	2020-09-09	20B	B.1.1.306	GR	Others	NA
EPI_ISL_700248	Maharashtra	2020-09-09	20B	B.1.1.306	GR	Others	NA
EPI_ISL_700249	Maharashtra	2020-09-09	20B	B.1.1.306	GR	Others	NA
EPI_ISL_700250	Maharashtra	2020-09-09	20B	B.1.1.306	GR	Others	NA
EPI_ISL_700251	Maharashtra	2020-09-10	20B	B.1.1	GR	Others	NA
EPI_ISL_700252	Maharashtra	2020-09-10	20B	B.1.1.306	GR	Others	NA
EPI_ISL_700254	Maharashtra	2020-09-10	20B	B.1.1.306	GR	Others	NA
EPI_ISL_700255	Maharashtra	2020-09-11	20A	B.1.210	G	Others	NA
EPI_ISL_700257	Maharashtra	2020-09-11	20B	B.1.1.306	GR	Others	NA
EPI_ISL_700258	Maharashtra	2020-09-11	20B	B.1.1.414	GR	Others	NA
EPI_ISL_700259	Maharashtra	2020-09-11	20B	B.1.1.306	GR	Others	NA
EPI_ISL_700260	Maharashtra	2020-09-11	20A	B.1.36	GH	Others	NA
EPI_ISL_700261	Maharashtra	2020-09-11	20A	B.1.36	GH	Others	NA
EPI_ISL_700262	Maharashtra	2020-09-11	20B	B.1.1.306	GR	Others	NA
EPI_ISL_700264	Maharashtra	2020-09-11	20A	B.1	G	Others	NA
EPI_ISL_700265	Maharashtra	2020-09-12	20B	B.1.1.354	GR	Others	NA
EPI_ISL_700266	Maharashtra	2020-09-12	20A	B.1	GH	Others	NA
EPI_ISL_700269	Maharashtra	2020-09-12	20A	B.1.210	G	Others	NA
EPI_ISL_700270	Maharashtra	2020-09-13	20A	B.1.210	G	Others	NA
EPI_ISL_700271	Maharashtra	2020-09-13	20A	B.1.210	G	Others	NA
EPI_ISL_700273	Maharashtra	2020-09-14	20A	B.1.36	GH	Others	NA
EPI_ISL_700275	Maharashtra	2020-09-14	20A	B.1.36	GH	Others	NA
EPI_ISL_700276	Maharashtra	2020-09-14	20A	B.1.36	GH	Others	NA
EPI_ISL_700277	Maharashtra	2020-09-14	20A	B.1.36	GH	Others	NA
EPI_ISL_700278	Maharashtra	2020-09-14	20B	B.1.1.306	GR	Others	NA
EPI_ISL_700279	Maharashtra	2020-09-14	20B	B.1.1.306	GR	Others	NA
EPI_ISL_700280	Maharashtra	2020-09-14	20B	B.1.1.306	GR	Others	NA
EPI_ISL_700281	Maharashtra	2020-09-14	20B	B.1.1.306	GR	Others	NA
EPI_ISL_700282	Maharashtra	2020-09-14	20B	B.1.1.306	GR	Others	NA
EPI_ISL_700283	Maharashtra	2020-09-14	20B	B.1.1.306	GR	Others	NA
EPI_ISL_700284	Maharashtra	2020-09-14	20B	B.1.1.306	GR	Others	NA
EPI_ISL_700285	Maharashtra	2020-09-14	20B	B.1.1.306	GR	Others	NA
EPI_ISL_700289	Maharashtra	2020-09-15	20A	B.1.36	GH	Others	NA
EPI_ISL_700298	Maharashtra	2020-09-18	20B	B.1.1.306	GR	Others	NA
EPI_ISL_700299	Maharashtra	2020-09-18	20A	B.1.36	GH	Others	NA
EPI_ISL_1061417	NS	2020-03-10	19A	B.4	O	Others	NA
EPI_ISL_1419250	West_Bengal	2021-02-02	20A	B.1.618	G	Others	NA
EPI_ISL_1419252	West_Bengal	2020-11-04	20B	B.1.1	GR	Others	NA
EPI_ISL_1419253	West_Bengal	2020-11-04	20B	B.1.1	GR	Others	NA
EPI_ISL_1419254	West_Bengal	2020-11-04	20A	B.1	G	Others	NA
EPI_ISL_1419256	West_Bengal	2020-09-30	20A	B.1.36	GH	Others	NA
EPI_ISL_1419257	West_Bengal	2020-09-30	20A	B.1.36	GH	Others	NA
EPI_ISL_1419258	West_Bengal	2020-09-30	20A	B.1	G	Others	NA
EPI_ISL_1419259	West_Bengal	2020-09-30	20B	B.1.1.306	GR	Others	NA
EPI_ISL_1419271	West_Bengal	2020-10-01	20A	B.1.36	GH	Others	NA
EPI_ISL_1419272	West_Bengal	2020-10-20	20B	B.1.1.25	GR	Others	NA
EPI_ISL_1419273	West_Bengal	2020-10-20	20B	B.1.1	GR	Others	NA
EPI_ISL_1419274	West_Bengal	2020-10-20	20A	B.1	G	Others	NA
EPI_ISL_1419277	West_Bengal	2020-10-20	20A	B.1	G	Others	NA
EPI_ISL_1419279	West_Bengal	2020-10-20	20B	B.1.1.216	GR	Others	NA
EPI_ISL_1419280	West_Bengal	2020-10-20	20A	B.1	G	Others	NA
EPI_ISL_1419281	West_Bengal	2020-10-20	20A	B.1	G	Others	NA
EPI_ISL_1419282	West_Bengal	2020-10-21	20A	B.1.1	G	Others	NA
EPI_ISL_1419283	West_Bengal	2020-10-21	20A	B.1.1	G	Others	NA
EPI_ISL_1419284	West_Bengal	2020-10-21	20B	B.1.1.216	GR	Others	NA
EPI_ISL_1419285	West_Bengal	2020-10-21	20B	B.1.1.216	GR	Others	NA
EPI_ISL_1419287	West_Bengal	2020-10-21	20A	B.1.36	GH	Others	NA
EPI_ISL_1419288	West_Bengal	2020-10-21	20A	B.1.36.18	GH	Others	NA
EPI_ISL_1419290	West_Bengal	2020-10-26	20B	B.1.1.25	GR	Others	NA
EPI_ISL_1419293	West_Bengal	2021-02-06	20A	B.1.36	GH	Others	NA
EPI_ISL_1419294	West_Bengal	2020-11-05	20A	B.1.540	G	Others	NA
EPI_ISL_1419295	West_Bengal	2021-02-15	20B	B.1.1.216	GR	Others	NA
EPI_ISL_1419297	West_Bengal	2021-02-13	20B	B.1.1.25	GR	Others	NA
EPI_ISL_1419298	West_Bengal	2021-02-13	20B	B.1.1.25	GR	Others	NA
EPI_ISL_1419300	West_Bengal	2020-09-02	20B	B.1.1.216	GR	Others	NA
EPI_ISL_1419301	West_Bengal	2020-09-02	20A	B.1	G	Others	NA
EPI_ISL_1419302	West_Bengal	2020-09-02	20A	B.1	G	Others	NA
EPI_ISL_1419309	West_Bengal	2020-09-02	20B	B.1.1.216	GR	Others	NA
EPI_ISL_1419320	West_Bengal	2020-09-03	20A	B.1	G	Others	NA
EPI_ISL_1419321	West_Bengal	2020-09-03	20A	B.1.36	GH	Others	NA
EPI_ISL_1419322	West_Bengal	2020-09-03	20A	B.1	G	Others	NA
EPI_ISL_1419323	West_Bengal	2020-09-03	20A	B.1	G	Others	NA
EPI_ISL_1419325	West_Bengal	2020-09-03	20A	B.1.36	GH	Others	NA
EPI_ISL_1419326	West_Bengal	2020-09-03	20A	B.1.36	GH	Others	NA
EPI_ISL_1419327	West_Bengal	2020-09-03	20A	B.1.36	GH	Others	NA
EPI_ISL_1419328	West_Bengal	2020-09-03	20A	B.1.36	GH	Others	NA
EPI_ISL_1419329	West_Bengal	2020-09-03	20A	B.1.540	G	Others	NA
EPI_ISL_508350	West_Bengal	2020-04-25	20A	B.1	G	Others	NA
EPI_ISL_508351	West_Bengal	2020-04-25	20A	B.1	G	Others	NA
EPI_ISL_508352	West_Bengal	2020-04-25	19A	B.6	O	Others	NA
EPI_ISL_508353	West_Bengal	2020-04-25	20A	B.1	G	Others	NA
EPI_ISL_508354	West_Bengal	2020-04-25	20A	B.1	G	Others	NA
EPI_ISL_508355	West_Bengal	2020-04-25	19B	A.9	S	Others	NA
EPI_ISL_508356	West_Bengal	2020-04-26	19B	A.9	S	Others	NA
EPI_ISL_508357	West_Bengal	2020-04-27	20A	B.1	G	Others	NA
EPI_ISL_508358	West_Bengal	2020-04-27	20A	B.1.540	G	Others	NA
EPI_ISL_508359	West_Bengal	2020-04-28	20A	B.1.540	G	Others	NA
EPI_ISL_508362	West_Bengal	2020-05-01	20A	B.1	G	Others	NA
EPI_ISL_508363	West_Bengal	2020-05-01	20A	B.1	G	Others	NA
EPI_ISL_508365	West_Bengal	2020-05-02	20A	B.1.540	G	Others	NA
EPI_ISL_508370	West_Bengal	2020-05-04	20A	B.1	G	Others	NA
EPI_ISL_508371	West_Bengal	2020-05-04	20A	B.1	G	Others	NA
EPI_ISL_508372	West_Bengal	2020-05-04	20A	B.1	G	Others	NA
EPI_ISL_508374	West_Bengal	2020-05-04	20A	B.1	G	Others	NA
EPI_ISL_508375	West_Bengal	2020-05-04	20A	B.1	G	Others	NA
EPI_ISL_508376	West_Bengal	2020-03-31	20A	B.1	G	Others	NA
EPI_ISL_508377	West_Bengal	2020-05-05	20A	B.1	G	Others	NA
EPI_ISL_508378	West_Bengal	2020-05-05	20A	B.1	G	Others	NA
EPI_ISL_508379	West_Bengal	2020-05-06	20A	B.1.540	G	Others	NA
EPI_ISL_508380	West_Bengal	2020-05-06	19B	A.9	S	Others	NA
EPI_ISL_508381	West_Bengal	2020-05-06	20A	B.1	G	Others	NA
EPI_ISL_508382	West_Bengal	2020-05-07	19B	A.9	S	Others	NA
EPI_ISL_508383	West_Bengal	2020-05-07	20A	B.1	G	Others	NA
EPI_ISL_508384	West_Bengal	2020-05-07	20A	B.1	G	Others	NA
EPI_ISL_508385	West_Bengal	2020-04-03	19B	A.9	S	Others	NA
EPI_ISL_508386	West_Bengal	2020-05-07	19B	A.9	S	Others	NA
EPI_ISL_508387	West_Bengal	2020-05-09	20A	B.1	G	Others	NA
EPI_ISL_508388	West_Bengal	2020-05-12	20A	B.1	G	Others	NA
EPI_ISL_508389	West_Bengal	2020-05-12	20A	B.1.540	G	Others	NA
EPI_ISL_508391	West_Bengal	2020-05-12	20A	B.1	G	Others	NA
EPI_ISL_508392	West_Bengal	2020-05-14	20A	B.1	G	Others	NA
EPI_ISL_508393	West_Bengal	2020-05-14	20A	B.1	G	Others	NA
EPI_ISL_508394	West_Bengal	2020-04-03	19B	A.9	S	Others	NA
EPI_ISL_508395	West_Bengal	2020-05-14	20A	B.1	G	Others	NA
EPI_ISL_508396	West_Bengal	2020-05-14	20A	B.1	G	Others	NA
EPI_ISL_508397	West_Bengal	2020-05-14	20A	B.1	G	Others	NA
EPI_ISL_508398	West_Bengal	2020-05-19	20A	B.1	G	Others	NA
EPI_ISL_508399	West_Bengal	2020-05-19	20A	B.1	G	Others	NA
EPI_ISL_508500	Haryana	2020-06-19	20A	B.1.36	GH	Others	NA
EPI_ISL_508501	Haryana	2020-06-22	20A	B.1.36	GH	Others	NA
EPI_ISL_508502	Haryana	2020-06-14	20B	B.1.1.306	GR	Others	NA
EPI_ISL_508503	Haryana	2020-06-22	20A	B.1.36	GH	Others	NA
EPI_ISL_508504	Haryana	2020-05-06	20B	B.1.1.216	GR	Others	NA
EPI_ISL_508505	Haryana	2020-06-14	20A	B.1.36	GH	Others	NA
EPI_ISL_508506	Haryana	2020-05-12	20A	B.1.36	GH	Others	NA
EPI_ISL_508507	Haryana	2020-06-14	20A	B.1.36	GH	Others	NA
EPI_ISL_508509	Haryana	2020-06-17	20A	B.1.36	GH	Others	NA
EPI_ISL_539650	Telangana	2020-08-12	20B	B.1.1.326	GR	Others	NA
EPI_ISL_539651	Telangana	2020-08-10	20B	B.1.1.326	GR	Others	NA
EPI_ISL_539652	Telangana	2020-08-12	20B	B.1.1.326	GR	Others	NA
EPI_ISL_539653	Telangana	2020-08-13	20B	B.1.1.326	GR	Others	NA
EPI_ISL_539654	Telangana	2020-08-11	20B	B.1.1.326	GR	Others	NA
EPI_ISL_539655	Telangana	2020-08-12	20B	B.1.1.326	GR	Others	NA
EPI_ISL_539656	Telangana	2020-08-15	20B	B.1.1.326	GR	Others	NA
EPI_ISL_539657	Telangana	2020-08-14	20B	B.1.1.326	GR	Others	NA
EPI_ISL_539658	Telangana	2020-08-19	20B	B.1.1.326	GR	Others	NA
EPI_ISL_539659	Telangana	2020-08-19	20B	B.1.1.326	GR	Others	NA
EPI_ISL_539660	Telangana	2020-08-19	20B	B.1.1.326	GR	Others	NA
EPI_ISL_539661	Telangana	2020-08-19	20B	B.1.1.326	GR	Others	NA
EPI_ISL_539662	Telangana	2020-08-15	20B	B.1.1.326	GR	Others	NA
EPI_ISL_539663	Telangana	2020-08-11	20B	B.1.1.326	GR	Others	NA
EPI_ISL_539664	Telangana	2020-08-14	20B	B.1.1.326	GR	Others	NA
EPI_ISL_539665	Telangana	2020-08-16	20B	B.1.1.8	GR	Others	NA
EPI_ISL_539666	Telangana	2020-08-13	20B	B.1.1.326	GR	Others	NA
EPI_ISL_539667	Telangana	2020-08-10	20B	B.1.1.354	GR	Others	NA
EPI_ISL_539668	Telangana	2020-08-10	20B	B.1.1.354	GR	Others	NA
EPI_ISL_539669	Telangana	2020-08-13	20B	B.1.1	GR	Others	NA
EPI_ISL_539670	Telangana	2020-08-12	20B	B.1.1.326	GR	Others	NA
EPI_ISL_539671	Telangana	2020-08-13	20B	B.1.1.326	GR	Others	NA
EPI_ISL_539672	Telangana	2020-08-11	20B	B.1.1.326	GR	Others	NA
EPI_ISL_539673	Telangana	2020-08-19	20B	B.1.1.326	GR	Others	NA
EPI_ISL_539674	Telangana	2020-08-13	20B	B.1.1.326	GR	Others	NA
EPI_ISL_539675	Telangana	2020-08-16	20B	B.1.1.326	GR	Others	NA
EPI_ISL_539676	Telangana	2020-08-10	20B	B.1.1.326	GR	Others	NA
EPI_ISL_539677	Telangana	2020-08-10	20B	B.1.1.326	GR	Others	NA
EPI_ISL_539678	Telangana	2020-08-13	20B	B.1.1.326	GR	Others	NA
EPI_ISL_539679	Telangana	2020-08-09	20B	B.1.1.326	GR	Others	NA
EPI_ISL_539680	Telangana	2020-08-10	20B	B.1.1.326	GR	Others	NA
EPI_ISL_539681	Telangana	2020-08-14	20B	B.1.1.326	GR	Others	NA
EPI_ISL_539682	Telangana	2020-08-14	20B	B.1.1.326	GR	Others	NA
EPI_ISL_539683	Telangana	2020-08-10	20B	B.1.1.306	GR	Others	NA
EPI_ISL_539684	Telangana	2020-08-10	20B	B.1.1.306	GR	Others	NA
EPI_ISL_539685	Telangana	2020-08-11	20B	B.1.1.306	GR	Others	NA
EPI_ISL_539686	Telangana	2020-08-12	20B	B.1.1.306	GR	Others	NA
EPI_ISL_539687	Telangana	2020-08-11	20B	B.1.1.306	GR	Others	NA
EPI_ISL_539688	Telangana	2020-08-11	20B	B.1.1.306	GR	Others	NA
EPI_ISL_539689	Telangana	2020-08-11	20B	B.1.1.306	GR	Others	NA
EPI_ISL_539690	Telangana	2020-08-11	20B	B.1.1.306	GR	Others	NA
EPI_ISL_539691	Telangana	2020-08-17	20B	B.1.1.306	GR	Others	NA
EPI_ISL_539692	Telangana	2020-08-11	20B	B.1.1.306	GR	Others	NA
EPI_ISL_539693	Telangana	2020-08-13	20B	B.1.1.306	GR	Others	NA
EPI_ISL_539694	Telangana	2020-08-11	20B	B.1.1.306	GR	Others	NA
EPI_ISL_539695	Telangana	2020-08-13	20B	B.1.1.306	GR	Others	NA
EPI_ISL_539696	Telangana	2020-08-13	20B	B.1.1.306	GR	Others	NA
EPI_ISL_539697	Telangana	2020-08-13	20B	B.1.1.306	GR	Others	NA
EPI_ISL_539698	Telangana	2020-08-13	20B	B.1.1.306	GR	Others	NA
EPI_ISL_539699	Telangana	2020-08-13	20B	B.1.1.306	GR	Others	NA
EPI_ISL_636760	Delhi	2020-08-14	20A	B.1.36	GH	Others	NA
EPI_ISL_636761	Delhi	2020-08-14	20B	B.1.1	GR	Others	NA
EPI_ISL_700290	Maharashtra	2020-09-15	20B	B.1.1.306	GR	Others	NA
EPI_ISL_700291	Maharashtra	2020-09-15	20B	B.1.1.306	GR	Others	NA
EPI_ISL_700292	Maharashtra	2020-09-16	20A	B.1	G	Others	NA
EPI_ISL_700294	Maharashtra	2020-09-16	20B	B.1.1.216	GR	Others	NA
EPI_ISL_700295	Maharashtra	2020-09-16	20B	B.1.1.306	GR	Others	NA
EPI_ISL_700296	Maharashtra	2020-09-18	20B	B.1.1.306	GR	Others	NA
EPI_ISL_700297	Maharashtra	2020-09-18	20B	B.1.1.306	GR	Others	NA
EPI_ISL_910100	Telangana	2020-08-30	20B	B.1.1.326	GR	Others	NA
EPI_ISL_910101	Telangana	2020-08-30	20B	B.1.1.326	GR	Others	NA
EPI_ISL_910102	Telangana	2020-08-30	20A	B.1.36.29	GH	Others	NA
EPI_ISL_910103	Telangana	2020-08-30	20B	B.1.1.326	GR	Others	NA
EPI_ISL_910104	Telangana	2020-08-30	20A	B.1.36.8	GH	Others	NA
EPI_ISL_910105	Telangana	2020-08-30	20B	B.1.1.326	GR	Others	NA
EPI_ISL_910106	Telangana	2020-08-30	20A	B.1.36.29	GH	Others	NA
EPI_ISL_910107	Telangana	2020-08-30	20B	B.1.1.326	GR	Others	NA
EPI_ISL_910131	Telangana	2020-09-08	20B	B.1.1.326	GR	Others	NA
EPI_ISL_910132	Telangana	2020-09-08	20B	B.1.1.306	GR	Others	NA
EPI_ISL_910133	Telangana	2020-09-08	20B	B.1.1.306	GR	Others	NA
EPI_ISL_910134	Telangana	2020-09-08	20B	B.1.1.306	GR	Others	NA
EPI_ISL_910135	Telangana	2020-09-08	20A	B.1.36.29	GH	Others	NA
EPI_ISL_910136	Telangana	2020-09-08	20A	B.1.36.29	GH	Others	NA
EPI_ISL_910137	Telangana	2020-09-08	20B	B.1.1.326	GR	Others	NA
EPI_ISL_910138	Telangana	2020-09-08	20B	B.1.1.326	GR	Others	NA
EPI_ISL_910139	Telangana	2020-09-08	20B	B.1.1.306	GR	Others	NA
EPI_ISL_910140	Telangana	2020-09-08	20B	B.1.1.326	GR	Others	NA
EPI_ISL_910141	Telangana	2020-09-08	20B	B.1.1.326	GR	Others	NA
EPI_ISL_910142	Telangana	2020-09-08	20B	B.1.1.326	GR	Others	NA
EPI_ISL_910144	Telangana	2020-09-08	20B	B.1.1.326	GR	Others	NA
EPI_ISL_910145	Telangana	2020-09-09	20B	B.1.1.326	GR	Others	NA
EPI_ISL_910146	Telangana	2020-09-09	20B	B.1.1.326	GR	Others	NA
EPI_ISL_910147	Telangana	2020-09-09	20A	B.1.36.29	GH	Others	NA
EPI_ISL_910148	Telangana	2020-09-09	20B	B.1.1.306	GR	Others	NA
EPI_ISL_910149	Telangana	2020-09-09	20B	B.1.1.326	GR	Others	NA
EPI_ISL_910150	Telangana	2020-09-09	20B	B.1.1.326	GR	Others	NA
EPI_ISL_910151	Telangana	2020-09-09	20B	B.1.1.326	GR	Others	NA
EPI_ISL_910152	Telangana	2020-09-09	20B	B.1.1.306	GR	Others	NA
EPI_ISL_910153	Telangana	2020-09-09	20A	B.1.36.29	GH	Others	NA
EPI_ISL_910154	Telangana	2020-09-09	20A	B.1.36.29	GH	Others	NA
EPI_ISL_910155	Telangana	2020-09-09	20B	B.1.1.326	GR	Others	NA
EPI_ISL_910156	Telangana	2020-09-09	20B	B.1.1.326	GR	Others	NA
EPI_ISL_910157	Telangana	2020-09-09	20B	B.1.1	GR	Others	NA
EPI_ISL_910159	Telangana	2020-09-09	20B	B.1.1.306	GR	Others	NA
EPI_ISL_910160	Telangana	2020-09-09	20B	B.1.1.306	GR	Others	NA
EPI_ISL_910161	Telangana	2020-09-10	20B	B.1.1.306	GR	Others	NA
EPI_ISL_910162	Telangana	2020-09-10	20B	B.1.1.326	GR	Others	NA
EPI_ISL_910163	Telangana	2020-09-10	20B	B.1.1.326	GR	Others	NA
EPI_ISL_910164	Telangana	2020-09-10	20B	B.1.1.326	GR	Others	NA
EPI_ISL_910165	Telangana	2020-09-10	20B	B.1.1.326	GR	Others	NA
EPI_ISL_910166	Telangana	2020-09-10	20B	B.1.1.326	GR	Others	NA
EPI_ISL_910167	Telangana	2020-09-10	20B	B.1.1.326	GR	Others	NA
EPI_ISL_910168	Telangana	2020-09-11	20A	B.1.36.29	GH	Others	NA
EPI_ISL_910169	Telangana	2020-09-11	20B	B.1.1.326	GR	Others	NA
EPI_ISL_1055768	Maharashtra	2020-03-19	20B	B.1.1	GR	Others	NA
EPI_ISL_1380338	Telangana	2020-12-08	20A	B.1.36.29	GH	Others	NA
EPI_ISL_1380339	Telangana	2020-12-08	20B	B.1.1	GR	Others	NA
EPI_ISL_1380340	Telangana	2020-12-08	20A	B.1.36.29	GH	Others	NA
EPI_ISL_1380341	Telangana	2020-12-08	20A	B.1.36.29	GH	Others	NA
EPI_ISL_1380342	Telangana	2020-12-08	20A	B.1.36.29	GH	Others	NA
EPI_ISL_1380343	Telangana	2020-12-09	20B	B.1.1.306	GR	Others	NA
EPI_ISL_1380345	Telangana	2020-12-09	20B	B.1.1	GR	Others	NA
EPI_ISL_1380346	Telangana	2020-12-09	20A	B.1.36.29	GH	Others	NA
EPI_ISL_1380347	Telangana	2020-12-09	20A	B.1.36.29	GH	Others	NA
EPI_ISL_1380348	Telangana	2020-12-09	20A	B.1.36.29	GH	Others	NA
EPI_ISL_1380349	Telangana	2020-12-09	20A	B.1.36.29	GH	Others	NA
EPI_ISL_1380350	Telangana	2020-12-09	20A	B.1.36.29	GH	Others	NA
EPI_ISL_1380351	Telangana	2020-12-09	20A	B.1.36.29	GH	Others	NA
EPI_ISL_1380352	Telangana	2020-12-09	20A	B.1.36.29	GH	Others	NA
EPI_ISL_1380353	Telangana	2020-12-09	20A	B.1.36.29	GH	Others	NA
EPI_ISL_1380354	Telangana	2020-12-10	20A	B.1.36.29	GH	Others	NA
EPI_ISL_1380355	Telangana	2020-12-10	20A	B.1.36.29	GH	Others	NA
EPI_ISL_1380356	Telangana	2020-12-10	20B	B.1.1	GR	Others	NA
EPI_ISL_1380357	Telangana	2020-12-10	20A	B.1.36.29	GH	Others	NA
EPI_ISL_1380358	Telangana	2020-12-10	20B	B.1.1.326	GR	Others	NA
EPI_ISL_1380359	Telangana	2020-12-10	20B	B.1.1.306	GR	Others	NA
EPI_ISL_1380360	Telangana	2020-12-10	20A	B.1.36.29	GH	Others	NA
EPI_ISL_1380361	Telangana	2020-12-10	20A	B.1.36.29	GH	Others	NA
EPI_ISL_1380362	Telangana	2020-12-10	20B	B.1.1.326	GR	Others	NA
EPI_ISL_1380363	Telangana	2020-12-10	20B	B.1.1.326	GR	Others	NA
EPI_ISL_1380364	Telangana	2020-12-10	20A	B.1.36.29	GH	Others	NA
EPI_ISL_1380365	Telangana	2020-12-10	20A	B.1.36.29	GH	Others	NA
EPI_ISL_1380366	Telangana	2020-12-10	20A	B.1.36.29	GH	Others	NA
EPI_ISL_1380367	Telangana	2020-12-10	20B	B.1.1.101	GR	Others	NA
EPI_ISL_1380368	Telangana	2020-12-10	20A	B.1.36.29	GH	Others	NA
EPI_ISL_1380369	Telangana	2020-12-10	20A	B.1.36.29	GH	Others	NA
EPI_ISL_1380370	Telangana	2020-12-10	20B	B.1.1	GR	Others	NA
EPI_ISL_1380371	Telangana	2020-12-11	20A	B.1.36.29	GH	Others	NA
EPI_ISL_1380372	Telangana	2020-12-11	20A	B.1.36.29	GH	Others	NA
EPI_ISL_1380373	Telangana	2020-12-11	20A	B.1.36.29	GH	Others	NA
EPI_ISL_1380374	Telangana	2020-12-11	20A	B.1.36.29	GH	Others	NA
EPI_ISL_1380375	Telangana	2020-12-11	20A	B.1.36.29	GH	Others	NA
EPI_ISL_1380376	Telangana	2020-12-11	20A	B.1.36.29	GH	Others	NA
EPI_ISL_1380377	Telangana	2020-12-11	20A	B.1.36.29	GH	Others	NA
EPI_ISL_1380378	Telangana	2020-12-11	20A	B.1.36.29	GH	Others	NA
EPI_ISL_1380379	Telangana	2020-12-11	20A	B.1.36.29	GH	Others	NA
EPI_ISL_1380381	Telangana	2020-12-12	20A	B.1.36.29	GH	Others	NA
EPI_ISL_1380382	Telangana	2020-12-12	20A	B.1.36.29	GH	Others	NA
EPI_ISL_1380383	Telangana	2020-12-12	20A	B.1.36.29	GH	Others	NA
EPI_ISL_1380385	Telangana	2020-12-12	20B	B.1.1.306	GR	Others	NA
EPI_ISL_1380386	Telangana	2020-12-12	20A	B.1.36.29	GH	Others	NA
EPI_ISL_1380387	Telangana	2020-12-12	20A	B.1.36.29	GH	Others	NA
EPI_ISL_1380388	Telangana	2020-12-12	20A	B.1.36.29	GH	Others	NA
EPI_ISL_1380389	Telangana	2020-12-13	20A	B.1.36	GH	Others	NA
EPI_ISL_1380390	Telangana	2020-12-13	20A	B.1.36.29	GH	Others	NA
EPI_ISL_1380391	Telangana	2020-12-13	20A	B.1.36.29	GH	Others	NA
EPI_ISL_1380392	Telangana	2020-12-13	20A	B.1.36.29	GH	Others	NA
EPI_ISL_1380393	Telangana	2020-12-13	20A	B.1.36.29	GH	Others	NA
EPI_ISL_1380394	Telangana	2020-12-13	20B	B.1.1.216	GR	Others	NA
EPI_ISL_1380395	Telangana	2020-12-13	20A	B.1.36.29	GH	Others	NA
EPI_ISL_1380396	Telangana	2020-12-13	20B	B.1.1.216	GR	Others	NA
EPI_ISL_1380397	Telangana	2020-12-13	20B	B.1.1.306	GR	Others	NA
EPI_ISL_1380398	Telangana	2020-12-13	20A	B.1.36.29	GH	Others	NA
EPI_ISL_1380399	Telangana	2020-12-13	20A	B.1.36.29	GH	Others	NA
EPI_ISL_1419310	West_Bengal	2020-09-02	20A	B.1.540	G	Others	NA
EPI_ISL_1419312	West_Bengal	2020-09-03	20A	B.1	G	Others	NA
EPI_ISL_1419314	West_Bengal	2020-09-02	20A	B.1.36	GH	Others	NA
EPI_ISL_1419315	West_Bengal	2020-09-02	20B	B.1.1.216	GR	Others	NA
EPI_ISL_1419316	West_Bengal	2020-09-02	20A	B.1.36	GH	Others	NA
EPI_ISL_1419318	West_Bengal	2020-09-03	20A	B.1.577	G	Others	NA
EPI_ISL_1419319	West_Bengal	2020-09-03	20B	B.1.1	GR	Others	NA
EPI_ISL_1419331	West_Bengal	2020-09-03	20A	B.1.36	GH	Others	NA
EPI_ISL_1419334	West_Bengal	2020-09-03	20A	B.1	G	Others	NA
EPI_ISL_1419335	West_Bengal	2020-09-03	20A	B.1.36	GH	Others	NA
EPI_ISL_1419336	West_Bengal	2020-09-03	20A	B.1.36	GH	Others	NA
EPI_ISL_1419338	West_Bengal	2020-09-03	20A	B.1.36	GH	Others	NA
EPI_ISL_1419339	West_Bengal	2020-09-03	20A	B.1.540	G	Others	NA
EPI_ISL_1419341	West_Bengal	2020-09-03	20A	B.1	G	Others	NA
EPI_ISL_1419342	West_Bengal	2020-09-03	20A	B.1.36	GH	Others	NA
EPI_ISL_1419343	West_Bengal	2020-09-03	20A	B.1.540	G	Others	NA
EPI_ISL_1419346	West_Bengal	2020-09-03	20A	B.1.36	GH	Others	NA
EPI_ISL_1419347	West_Bengal	2021-02-19	20B	B.1.1.25	GR	Others	NA
EPI_ISL_1662410	Chhattisgarh	2021-02-15	20A	B.1.617.1	G	Kappa	VOI
EPI_ISL_1662411	Chhattisgarh	2021-02-15	20A	B.1.36	GH	Others	NA
EPI_ISL_1662412	Chhattisgarh	2021-02-17	20A	B.1	G	Others	NA
EPI_ISL_1662413	Chhattisgarh	2021-02-17	20A	B.1	G	Others	NA
EPI_ISL_1662414	Chhattisgarh	2021-02-17	20A	B.1.36	GH	Others	NA
EPI_ISL_1662415	Chhattisgarh	2021-02-18	20A	B.1.36.17	GH	Others	NA
EPI_ISL_1662416	Chhattisgarh	2021-02-18	20A	B.1.560	G	Others	NA
EPI_ISL_1662417	Chhattisgarh	2021-02-20	20B	B.1.560	G	Others	NA
EPI_ISL_1662418	Chhattisgarh	2021-02-22	20A	B.1.36	G	Others	NA
EPI_ISL_1662419	Chhattisgarh	2021-02-22	20A	B.1	G	Others	NA
EPI_ISL_1662420	Chhattisgarh	2021-02-22	20A	B.1.617.1	G	Kappa	VOI
EPI_ISL_1662421	Chhattisgarh	2021-02-22	20A	B.1	G	Others	NA
EPI_ISL_1662422	Odisha	2021-03-24	20A	B.1	G	Others	NA
EPI_ISL_1662423	Odisha	2021-03-24	20A	B.1	G	Others	NA
EPI_ISL_1662424	Odisha	2021-03-25	20I/501Y.V1	B.1	G	Others	NA
EPI_ISL_1662425	Odisha	2021-03-25	20A	B.1	G	Others	NA
EPI_ISL_1662426	Odisha	2021-03-25	20A	B.1	G	Others	NA
EPI_ISL_1662427	Odisha	2021-03-25	20A	B.1.617.1	G	Kappa	VOI
EPI_ISL_1662428	Odisha	2021-03-25	20A	B.1	G	Others	NA
EPI_ISL_1662430	Odisha	2021-03-25	20A	B.1	G	Others	NA
EPI_ISL_1662431	Odisha	2021-03-25	20A	B.1.617.1	G	Kappa	VOI
EPI_ISL_1662432	Odisha	2021-03-25	20A	B.1.36.10	G	Others	NA
EPI_ISL_1662434	Odisha	2021-03-25	20I/501Y.V1	B.1	G	Others	NA
EPI_ISL_1662435	Odisha	2021-03-25	20A	B.1	G	Others	NA
EPI_ISL_1662436	Odisha	2021-03-25	20A	B.1.222	G	Others	NA
EPI_ISL_1662437	Odisha	2021-03-25	20A	B.1	G	Others	NA
EPI_ISL_1662439	Odisha	2021-03-25	20A	B.1	G	Others	NA
EPI_ISL_1662440	Odisha	2021-03-25	20A	B.1.36.10	G	Others	NA
EPI_ISL_1662441	Odisha	2021-03-25	20A	B.1	G	Others	NA
EPI_ISL_1662442	Odisha	2021-03-25	20A	B.1	G	Others	NA
EPI_ISL_1662443	Odisha	2021-03-25	20A	B.1	G	Others	NA
EPI_ISL_1662444	Odisha	2021-03-26	20A	B.1	G	Others	NA
EPI_ISL_1662445	Odisha	2021-03-18	20A	B.1.222	G	Others	NA
EPI_ISL_1662447	Odisha	2021-03-18	20A	B.1.617.2	G	Delta	VOC
EPI_ISL_1662448	Odisha	2021-03-18	20A	B.1.222	G	Others	NA
EPI_ISL_1662450	Odisha	2021-03-18	20A	B.1	G	Others	NA
EPI_ISL_1662451	Odisha	2021-03-18	20A	B.1.617.2	G	Delta	VOC
EPI_ISL_1662452	Odisha	2021-03-18	20A	B.1	G	Others	NA
EPI_ISL_1662454	Odisha	2021-03-19	20A	B.1	G	Others	NA
EPI_ISL_1662455	Odisha	2021-03-18	20A	B.1	G	Others	NA
EPI_ISL_1662456	Odisha	2021-03-19	20A	B.1	G	Others	NA
EPI_ISL_1662457	Odisha	2021-03-19	20A	B.1	G	Others	NA
EPI_ISL_1662459	Odisha	2021-03-19	20A	B.1.36.10	G	Others	NA
EPI_ISL_1708330	Karnataka	2020-09-05	20B	B.1.1.46	GR	Others	NA
EPI_ISL_1708331	Karnataka	2020-09-06	20B	B.1.1.46	GR	Others	NA
EPI_ISL_1708332	Karnataka	2020-09-06	20B	B.1.1.46	GR	Others	NA
EPI_ISL_1708333	Karnataka	2020-09-06	20A	B.1.210	G	Others	NA
EPI_ISL_1708334	Karnataka	2020-09-08	20B	B.1.1	GR	Others	NA
EPI_ISL_1708335	Karnataka	2020-09-09	20A	B.1.36.29	GH	Others	NA
EPI_ISL_1708336	Karnataka	2020-09-12	20B	B.1.1.46	GR	Others	NA
EPI_ISL_1708337	Karnataka	2020-09-12	20A	B.1.36	GH	Others	NA
EPI_ISL_1708338	Karnataka	2020-09-13	20B	B.1.1	GR	Others	NA
EPI_ISL_1708339	Karnataka	2020-09-13	20A	B.1.36.29	GH	Others	NA
EPI_ISL_1708346	Karnataka	2020-09-15	20B	B.1.1	GR	Others	NA
EPI_ISL_1708349	Karnataka	2020-09-16	20A	B.1.36.29	GH	Others	NA
EPI_ISL_435071	Delhi	2020-03-25	20B	B.1.1	GR	Others	NA
EPI_ISL_435085	Maharashtra	2020-03-29	19A	B.6	O	Others	NA
EPI_ISL_435090	Jammu_and_Kashmir	2020-03-29	19A	B.6.6	O	Others	NA
EPI_ISL_435091	Tamil_Nadu	2020-03-28	19A	B.6.6	O	Others	NA
EPI_ISL_435095	Tamil_Nadu	2020-03-29	19A	B.6	O	Others	NA
EPI_ISL_435097	West_Bengal	2020-03-28	19A	B.6	O	Others	NA
EPI_ISL_447050	Gujarat	2020-04-29	20A	B.1.36.8	GH	Others	NA
EPI_ISL_447051	Gujarat	2020-04-29	20A	B.1.36.8	GH	Others	NA
EPI_ISL_447052	Gujarat	2020-05-02	20A	B.1	G	Others	NA
EPI_ISL_447053	Gujarat	2020-04-29	20A	B.1	GH	Others	NA
EPI_ISL_508330	Karnataka	2020-06-03	20A	B.1	G	Others	NA
EPI_ISL_508331	Karnataka	2020-06-20	20B	B.1.1	GR	Others	NA
EPI_ISL_508332	Karnataka	2020-05-27	20A	B.1.36.8	GH	Others	NA
EPI_ISL_508333	Karnataka	2020-06-18	20B	B.1.1.46	GR	Others	NA
EPI_ISL_508334	Karnataka	2020-05-19	20B	B.1.1.46	GR	Others	NA
EPI_ISL_508335	Karnataka	2020-06-17	20B	B.1.1.46	GR	Others	NA
EPI_ISL_508336	Karnataka	2020-06-20	20B	B.1.1.46	GR	Others	NA
EPI_ISL_508337	Karnataka	2020-06-19	20B	B.1.1.46	GR	Others	NA
EPI_ISL_508338	West_Bengal	2020-03-30	20A	B.1.540	G	Others	NA
EPI_ISL_508339	West_Bengal	2020-04-14	20A	B.1	G	Others	NA
EPI_ISL_508340	West_Bengal	2020-04-14	20A	B.1	G	Others	NA
EPI_ISL_508341	West_Bengal	2020-04-20	20A	B.1	G	Others	NA
EPI_ISL_508342	West_Bengal	2020-04-20	20A	B.1	G	Others	NA
EPI_ISL_508343	West_Bengal	2020-04-21	20A	B.1.540	G	Others	NA
EPI_ISL_508344	West_Bengal	2020-04-21	19B	A.9	S	Others	NA
EPI_ISL_508345	West_Bengal	2020-04-24	20A	B.1	G	Others	NA
EPI_ISL_508346	West_Bengal	2020-04-24	20A	B.1	G	Others	NA
EPI_ISL_508347	West_Bengal	2020-04-24	20A	B.1	G	Others	NA
EPI_ISL_508348	West_Bengal	2020-04-24	20A	B.1	G	Others	NA
EPI_ISL_508349	West_Bengal	2020-03-30	20A	B.1.540	G	Others	NA
EPI_ISL_508360	West_Bengal	2020-04-28	20A	B.1	G	Others	NA
EPI_ISL_508361	West_Bengal	2020-04-28	20A	B.1	G	Others	NA
EPI_ISL_508364	West_Bengal	2020-05-01	20A	B.1	G	Others	NA
EPI_ISL_508366	West_Bengal	2020-05-03	20A	B.1.540	G	Others	NA
EPI_ISL_508367	West_Bengal	2020-05-03	20A	B.1	G	Others	NA
EPI_ISL_508368	West_Bengal	2020-03-31	20A	B.1	G	Others	NA
EPI_ISL_508369	West_Bengal	2020-05-04	20A	B.1	G	Others	NA
EPI_ISL_528809	Andhra_Pradesh	2020-05-29	20B	B.1.1.8	GR	Others	NA
EPI_ISL_528810	Telangana	2020-05-24	20A	B.1.537	G	Others	NA
EPI_ISL_528811	Telangana	2020-05-19	20A	B.1.210	G	Others	NA
EPI_ISL_528812	Telangana	2020-05-24	20B	B.1.1	GR	Others	NA
EPI_ISL_528814	Telangana	2020-05-22	20B	B.1.1.326	GR	Others	NA
EPI_ISL_528816	Telangana	2020-05-23	20B	B.1.1.8	GR	Others	NA
EPI_ISL_528817	Telangana	2020-05-27	20B	B.1.1.326	GR	Others	NA
EPI_ISL_528818	Telangana	2020-05-17	20B	B.1.1.326	GR	Others	NA
EPI_ISL_528819	Telangana	2020-05-30	20B	B.1.1.326	GR	Others	NA
EPI_ISL_528821	Telangana	2020-05-23	20A	B.1.210	G	Others	NA
EPI_ISL_528822	Telangana	2020-05-23	20B	B.1.1.306	GR	Others	NA
EPI_ISL_528823	Telangana	2020-07-14	20B	B.1.1.326	GR	Others	NA
EPI_ISL_528824	Telangana	2020-07-14	20B	B.1.1.340	GR	Others	NA
EPI_ISL_528825	Telangana	2020-07-14	20B	B.1.1.326	GR	Others	NA
EPI_ISL_528826	Telangana	2020-07-14	20B	B.1.1.326	GR	Others	NA
EPI_ISL_528827	Telangana	2020-07-14	20B	B.1.1.306	GR	Others	NA
EPI_ISL_528828	Telangana	2020-07-14	20B	B.1.1.306	GR	Others	NA
EPI_ISL_528829	Telangana	2020-07-14	20B	B.1.1.326	GR	Others	NA
EPI_ISL_528830	Telangana	2020-07-14	20B	B.1.1.340	GR	Others	NA
EPI_ISL_528831	Telangana	2020-07-14	20B	B.1.1.340	GR	Others	NA
EPI_ISL_528832	Telangana	2020-07-14	20B	B.1.1.306	GR	Others	NA
EPI_ISL_528833	Telangana	2020-07-14	20B	B.1.1.326	GR	Others	NA
EPI_ISL_528834	Telangana	2020-07-14	20C	B.1.369	GH	Others	NA
EPI_ISL_528835	Telangana	2020-07-14	20B	B.1.1.326	GR	Others	NA
EPI_ISL_528836	Telangana	2020-07-14	20B	B.1.1.326	GR	Others	NA
EPI_ISL_528838	Telangana	2020-07-14	20B	B.1.1.306	GR	Others	NA
EPI_ISL_528839	Telangana	2020-07-14	20B	B.1.1.326	GR	Others	NA
EPI_ISL_528840	Telangana	2020-07-14	20B	B.1.1.306	GR	Others	NA
EPI_ISL_528841	Telangana	2020-07-14	20B	B.1.1.326	GR	Others	NA
EPI_ISL_528842	Telangana	2020-07-15	20B	B.1.1.326	GR	Others	NA
EPI_ISL_528843	Telangana	2020-07-15	20B	B.1.1.340	GR	Others	NA
EPI_ISL_528844	Telangana	2020-07-15	20B	B.1.1.340	GR	Others	NA
EPI_ISL_528845	Telangana	2020-07-15	20B	B.1.1.326	GR	Others	NA
EPI_ISL_528846	Telangana	2020-07-15	20B	B.1.1.306	GR	Others	NA
EPI_ISL_528847	Telangana	2020-07-15	20B	B.1.1.326	GR	Others	NA
EPI_ISL_528848	Telangana	2020-07-15	20B	B.1.1.306	GR	Others	NA
EPI_ISL_910109	Telangana	2020-08-30	20B	B.1.1.326	GR	Others	NA
EPI_ISL_910110	Telangana	2020-08-30	20B	B.1.1.326	GR	Others	NA
EPI_ISL_910111	Telangana	2020-08-31	20B	B.1.1.326	GR	Others	NA
EPI_ISL_910112	Telangana	2020-09-02	20B	B.1.1.306	GR	Others	NA
EPI_ISL_910113	Telangana	2020-08-31	20B	B.1.1.326	GR	Others	NA
EPI_ISL_910114	Telangana	2020-08-31	20B	B.1.1.326	GR	Others	NA
EPI_ISL_910115	Telangana	2020-08-31	20B	B.1.1.8	GR	Others	NA
EPI_ISL_910116	Telangana	2020-08-31	20B	B.1.1.326	GR	Others	NA
EPI_ISL_910117	Telangana	2020-08-31	20B	B.1.1.326	GR	Others	NA
EPI_ISL_910118	Telangana	2020-08-31	20B	B.1.1.306	GR	Others	NA
EPI_ISL_910120	Telangana	2020-08-31	20A	B.1.36.29	GH	Others	NA
EPI_ISL_910121	Telangana	2020-08-31	20A	B.1.36.29	GH	Others	NA
EPI_ISL_910122	Telangana	2020-08-31	20A	B.1.36.8	GH	Others	NA
EPI_ISL_910123	Telangana	2020-09-03	20B	B.1.1.306	GR	Others	NA
EPI_ISL_910124	Telangana	2020-09-03	20B	B.1.1.326	GR	Others	NA
EPI_ISL_910125	Telangana	2020-09-03	20A	B.1	G	Others	NA
EPI_ISL_910126	Telangana	2020-09-03	20A	B.1.36.29	GH	Others	NA
EPI_ISL_910127	Telangana	2020-09-03	20A	B.1.36.29	GH	Others	NA
EPI_ISL_910128	Telangana	2020-09-03	20A	B.1.36.29	GH	Others	NA
EPI_ISL_910129	Telangana	2020-09-08	20B	B.1.1.326	GR	Others	NA
EPI_ISL_1055770	Maharashtra	2020-03-28	20A	B.1.210	G	Others	NA
EPI_ISL_1055771	Maharashtra	2020-03-29	20A	B.1.210	G	Others	NA
EPI_ISL_1055785	Maharashtra	2020-03-29	20A	B.1.210	G	Others	NA
EPI_ISL_1055788	Maharashtra	2020-04-07	20A	B.1.210	G	Others	NA
EPI_ISL_1055789	Maharashtra	2020-04-15	20A	B.1.210	G	Others	NA
EPI_ISL_1380300	Telangana	2020-11-19	20A	B.1.36.29	GH	Others	NA
EPI_ISL_1380301	Telangana	2020-11-19	20A	B.1.36	GH	Others	NA
EPI_ISL_1380302	Telangana	2020-11-19	20B	B.1.1.306	GR	Others	NA
EPI_ISL_1380303	Telangana	2020-12-02	20A	B.1.36.29	GH	Others	NA
EPI_ISL_1380304	Telangana	2020-12-02	20A	B.1.36.29	GH	Others	NA
EPI_ISL_1380305	Telangana	2020-12-02	20A	B.1.36.29	GH	Others	NA
EPI_ISL_1380306	Telangana	2020-12-02	20A	B.1.36.29	GH	Others	NA
EPI_ISL_1380307	Telangana	2020-12-02	20A	B.1.36.29	GH	Others	NA
EPI_ISL_1380312	Telangana	2020-12-03	20A	B.1.36.29	GH	Others	NA
EPI_ISL_1380315	Telangana	2020-12-03	20A	B.1.36.29	GH	Others	NA
EPI_ISL_1380318	Telangana	2020-12-05	20A	B.1.36	GH	Others	NA
EPI_ISL_1380320	Telangana	2020-12-05	20A	B.1.36.29	GH	Others	NA
EPI_ISL_1380322	Telangana	2020-12-05	20A	B.1.36.29	GH	Others	NA
EPI_ISL_1380324	Telangana	2020-12-06	20B	B.1.1.326	GR	Others	NA
EPI_ISL_1380325	Telangana	2020-12-06	20A	B.1.36.29	GH	Others	NA
EPI_ISL_1380326	Telangana	2020-12-06	20A	B.1.36.29	GH	Others	NA
EPI_ISL_1380329	Telangana	2020-12-06	20B	B.1.1	GR	Others	NA
EPI_ISL_1380331	Telangana	2020-12-08	20A	B.1.36.29	GH	Others	NA
EPI_ISL_1380332	Telangana	2020-12-08	20A	B.1.36.29	GH	Others	NA
EPI_ISL_1380333	Telangana	2020-12-08	20B	B.1.1	GR	Others	NA
EPI_ISL_1380334	Telangana	2020-12-08	20A	B.1.36.29	GH	Others	NA
EPI_ISL_1419351	West_Bengal	2021-02-22	20B	B.1.1.25	GR	Others	NA
EPI_ISL_1419352	West_Bengal	2021-02-23	20B	B.1.1.101	GR	Others	NA
EPI_ISL_1419354	West_Bengal	2021-02-22	20A	B.1.618	G	Others	NA
EPI_ISL_1419365	West_Bengal	2020-10-26	20A	B.1	G	Others	NA
EPI_ISL_1419366	West_Bengal	2020-10-26	20B	B.1.1	GR	Others	NA
EPI_ISL_1419369	West_Bengal	2020-10-26	20A	B.1	G	Others	NA
EPI_ISL_1419381	West_Bengal	2020-10-27	20A	B.1.36	GH	Others	NA
EPI_ISL_1419382	West_Bengal	2020-10-27	20B	B.1.1	GR	Others	NA
EPI_ISL_1419383	West_Bengal	2020-10-27	20A	B.1.540	G	Others	NA
EPI_ISL_1419384	West_Bengal	2020-10-27	20A	B.1.540	G	Others	NA
EPI_ISL_1419386	West_Bengal	2020-10-27	20A	B.1	G	Others	NA
EPI_ISL_1419396	West_Bengal	2020-10-27	20A	B.1.618	G	Others	NA
EPI_ISL_1662400	Chhattisgarh	2021-02-08	20A	B.1.36.10	G	Others	NA
EPI_ISL_1662401	Chhattisgarh	2021-03-10	20B	B.1.1.216	G	Others	NA
EPI_ISL_1662402	Chhattisgarh	2021-02-10	20A	B.1	G	Others	NA
EPI_ISL_1662403	Chhattisgarh	2021-02-10	20A	B.1	G	Others	NA
EPI_ISL_1662404	Chhattisgarh	2021-02-11	20A	B.1	G	Others	NA
EPI_ISL_1662405	Chhattisgarh	2021-02-11	20A	B.1	GH	Others	NA
EPI_ISL_1662406	Chhattisgarh	2021-02-11	20A	B.1.36.29	GH	Others	NA
EPI_ISL_1662407	Chhattisgarh	2021-02-11	20A	B.1.36.17	GH	Others	NA
EPI_ISL_1662408	Chhattisgarh	2021-02-13	20A	B.1.36	GH	Others	NA
EPI_ISL_1662409	Chhattisgarh	2021-02-15	20A	B.1	G	Others	NA
EPI_ISL_1662460	Odisha	2021-03-19	20A	B.1	G	Others	NA
EPI_ISL_1662461	Odisha	2021-03-19	20A	B.1	G	Others	NA
EPI_ISL_1662462	Odisha	2021-03-19	20A	B.1	G	Others	NA
EPI_ISL_1662463	Odisha	2021-03-19	20A	B.1	G	Others	NA
EPI_ISL_1708322	Karnataka	2021-01-02	20A	B.1.36.29	GH	Others	NA
EPI_ISL_1708323	Karnataka	2021-01-11	20A	B.1.36.29	GH	Others	NA
EPI_ISL_1708324	Karnataka	2021-01-17	20B	B.1.1.46	GR	Others	NA
EPI_ISL_1708325	Karnataka	2021-01-18	20A	B.1.36.29	GH	Others	NA
EPI_ISL_1708326	Karnataka	2021-01-19	20B	B.1.1.46	GR	Others	NA
EPI_ISL_1708327	Karnataka	2021-01-19	20A	B.1.36.29	GH	Others	NA
EPI_ISL_1708328	Karnataka	2021-01-23	20B	B.1.1.306	GR	Others	NA
EPI_ISL_1708329	Karnataka	2020-09-05	20B	B.1.1	GR	Others	NA
EPI_ISL_1708340	Karnataka	2020-09-13	20B	B.1.1.46	GR	Others	NA
EPI_ISL_1708341	Karnataka	2020-09-14	20A	B.1.36	GH	Others	NA
EPI_ISL_1708342	Karnataka	2020-09-15	20B	B.1.1	GR	Others	NA
EPI_ISL_1708343	Karnataka	2020-09-15	20B	B.1.1	GR	Others	NA
EPI_ISL_1708344	Karnataka	2020-09-15	20B	B.1.1	GR	Others	NA
EPI_ISL_1708345	Karnataka	2020-09-15	20B	B.1.1	GR	Others	NA
EPI_ISL_1708347	Karnataka	2020-09-15	20B	B.1.1.354	GR	Others	NA
EPI_ISL_1708348	Karnataka	2020-09-15	20B	B.1.1.354	GR	Others	NA
EPI_ISL_1710598	Maharashtra	2021-03-04	20A	B.1.36.29	GH	Others	NA
EPI_ISL_424361	NS	2020-03-10	19A	B.4	O	Others	NA
EPI_ISL_424363	NS	2020-03-12	19A	B.4	O	Others	NA
EPI_ISL_424364	NS	2020-03-17	20A	B.1	G	Others	NA
EPI_ISL_424365	NS	2020-03-17	20A	B.1	G	Others	NA
EPI_ISL_435049	Gujarat	2020-04-13	20A	B.1	G	Others	NA
EPI_ISL_435050	Gujarat	2020-04-13	20A	B.1	G	Others	NA
EPI_ISL_435051	Gujarat	2020-04-13	20C	B.1	GH	Others	NA
EPI_ISL_435052	Gujarat	2020-04-13	20C	B.1	GH	Others	NA
EPI_ISL_435053	Gujarat	2020-04-07	20A	B.1	G	Others	NA
EPI_ISL_435054	Gujarat	2020-04-14	20A	B.1	G	Others	NA
EPI_ISL_435055	Gujarat	2020-04-22	20A	B.1.36.8	GH	Others	NA
EPI_ISL_435056	Gujarat	2020-04-21	20A	B.1.145	G	Others	NA
EPI_ISL_435063	Delhi	2020-03-13	20C	B.1	GH	Others	NA
EPI_ISL_437626	Telangana	2020-03-24	20A	B.1	GH	Others	NA
EPI_ISL_447030	Gujarat	2020-05-03	20A	B.1	G	Others	NA
EPI_ISL_447031	Gujarat	2020-05-03	20A	B.1	G	Others	NA
EPI_ISL_447033	Gujarat	2020-05-03	20A	B.1.36.8	GH	Others	NA
EPI_ISL_447035	Gujarat	2020-05-03	20A	B.1.36.8	GH	Others	NA
EPI_ISL_447036	Gujarat	2020-05-03	20A	B.1	GH	Others	NA
EPI_ISL_447037	Gujarat	2020-05-03	20A	B.1	GH	Others	NA
EPI_ISL_447038	Gujarat	2020-05-03	20A	B.1	G	Others	NA
EPI_ISL_447039	Gujarat	2020-05-03	20A	B.1.36.8	GH	Others	NA
EPI_ISL_447040	Gujarat	2020-05-03	20A	B.1.36.8	GH	Others	NA
EPI_ISL_447041	Gujarat	2020-05-03	20A	B.1	GH	Others	NA
EPI_ISL_447042	Gujarat	2020-05-03	20A	B.1.465	GH	Others	NA
EPI_ISL_447043	Gujarat	2020-05-03	20A	B.1.36.8	GH	Others	NA
EPI_ISL_447044	Gujarat	2020-05-03	20A	B.1.36.8	GH	Others	NA
EPI_ISL_447045	Gujarat	2020-05-03	20A	B.1.36.8	GH	Others	NA
EPI_ISL_447046	Gujarat	2020-05-04	20A	B.1.36.8	GH	Others	NA
EPI_ISL_447047	Gujarat	2020-04-29	20A	B.1	G	Others	NA
EPI_ISL_447048	Gujarat	2020-04-27	20A	B.1.36.8	GH	Others	NA
EPI_ISL_447049	Gujarat	2020-04-29	20A	B.1.36.8	GH	Others	NA
EPI_ISL_455478	Odisha	2020-04-09	20A	B.1	GH	Others	NA
EPI_ISL_486669	Karnataka	2020	20B	B.1.1.46	GR	Others	NA
EPI_ISL_486670	Karnataka	2020	20B	B.1.1.46	GR	Others	NA
EPI_ISL_508400	West_Bengal	2020-05-17	20A	B.1	G	Others	NA
EPI_ISL_508401	West_Bengal	2020-05-17	20A	B.1	G	Others	NA
EPI_ISL_508402	West_Bengal	2020-05-17	20A	B.1	G	Others	NA
EPI_ISL_508403	West_Bengal	2020-05-17	20A	B.1	G	Others	NA
EPI_ISL_508404	West_Bengal	2020-05-17	20A	B.1	G	Others	NA
EPI_ISL_508405	West_Bengal	2020-05-19	20A	B.1	G	Others	NA
EPI_ISL_508406	West_Bengal	2020-05-19	20A	B.1	G	Others	NA
EPI_ISL_508407	West_Bengal	2020-04-13	20A	B.1	G	Others	NA
EPI_ISL_508408	West_Bengal	2020-05-20	20A	B.1	G	Others	NA
EPI_ISL_508409	West_Bengal	2020-05-20	20A	B.1	G	Others	NA
EPI_ISL_508410	West_Bengal	2020-05-20	20A	B.1	G	Others	NA
EPI_ISL_508411	West_Bengal	2020-05-24	20A	B.1	G	Others	NA
EPI_ISL_508412	West_Bengal	2020-05-24	20A	B.1	G	Others	NA
EPI_ISL_508413	West_Bengal	2020-05-24	20A	B.1	G	Others	NA
EPI_ISL_508414	West_Bengal	2020-05-24	20A	B.1	G	Others	NA
EPI_ISL_508415	Delhi	2020-06-16	20A	B.1.36	GH	Others	NA
EPI_ISL_508416	Delhi	2020-06-18	20B	B.1.1	GR	Others	NA
EPI_ISL_508417	Delhi	2020-06-18	20B	B.1.1	GR	Others	NA
EPI_ISL_508418	Delhi	2020-06-20	20A	B.1.36	GH	Others	NA
EPI_ISL_508419	Uttar_Pradesh	2020-06-27	20A	B.1.36	GH	Others	NA
EPI_ISL_508420	Delhi	2020-06-18	20A	B.1.36	GH	Others	NA
EPI_ISL_508421	Delhi	2020-06-18	20B	B.1.1	GR	Others	NA
EPI_ISL_508422	Delhi	2020-06-18	20A	B.1.36	GH	Others	NA
EPI_ISL_508423	Maharashtra	2020-04-29	20A	B.1	G	Others	NA
EPI_ISL_508424	Maharashtra	2020-05-01	19A	B.6.6	O	Others	NA
EPI_ISL_508427	Maharashtra	2020-05-15	20B	B.1.1.101	GR	Others	NA
EPI_ISL_508428	Uttar_Pradesh	2020-05-17	20A	B.1.210	G	Others	NA
EPI_ISL_508429	Maharashtra	2020-05-21	20B	B.1.1.306	GR	Others	NA
EPI_ISL_508430	Maharashtra	2020-05-21	20B	B.1.1.306	GR	Others	NA
EPI_ISL_508431	Maharashtra	2020-05-23	20B	B.1.1.306	GR	Others	NA
EPI_ISL_508432	Maharashtra	2020-05-23	20B	B.1.1.306	GR	Others	NA
EPI_ISL_508433	Maharashtra	2020-04-27	19A	B.6	O	Others	NA
EPI_ISL_508434	Odisha	2020-05-26	19B	A	S	Others	NA
EPI_ISL_508435	Maharashtra	2020-05-25	20B	B.1.1.306	GR	Others	NA
EPI_ISL_508436	Maharashtra	2020-05-29	20B	B.1.1.306	GR	Others	NA
EPI_ISL_508437	Maharashtra	2020-06-04	20A	B.1.36	GH	Others	NA
EPI_ISL_508439	Maharashtra	2020-04-27	19A	B.6	O	Others	NA
EPI_ISL_508440	Maharashtra	2020-04-27	19A	B.6	O	Others	NA
EPI_ISL_508444	West_Bengal	2020-05-02	20A	B.1	G	Others	NA
EPI_ISL_508445	West_Bengal	2020-05-02	20A	B.1	G	Others	NA
EPI_ISL_508446	West_Bengal	2020-05-02	19A	B.6	O	Others	NA
EPI_ISL_508447	West_Bengal	2020-04-28	20A	B.1	G	Others	NA
EPI_ISL_508448	West_Bengal	2020-05-01	20A	B.1	G	Others	NA
EPI_ISL_508449	West_Bengal	2020-05-01	20A	B.1	G	Others	NA
EPI_ISL_528849	Telangana	2020-07-15	20B	B.1.1.326	GR	Others	NA
EPI_ISL_528850	Telangana	2020-07-15	20B	B.1.1.8	GR	Others	NA
EPI_ISL_528851	Telangana	2020-07-14	20B	B.1.1.340	GR	Others	NA
EPI_ISL_528852	Telangana	2020-07-14	20B	B.1.1.306	GR	Others	NA
EPI_ISL_528853	Telangana	2020-07-14	20B	B.1.1.306	GR	Others	NA
EPI_ISL_528854	Telangana	2020-07-14	20B	B.1.1.306	GR	Others	NA
EPI_ISL_528855	Telangana	2020-07-14	20B	B.1.1.306	GR	Others	NA
EPI_ISL_528856	Telangana	2020-07-14	20B	B.1.1.306	GR	Others	NA
EPI_ISL_528857	Telangana	2020-07-14	20B	B.1.1.326	GR	Others	NA
EPI_ISL_528858	Telangana	2020-07-14	20B	B.1.1.326	GR	Others	NA
EPI_ISL_528859	Telangana	2020-07-14	20B	B.1.1.326	GR	Others	NA
EPI_ISL_528860	Telangana	2020-07-14	20B	B.1.1.326	GR	Others	NA
EPI_ISL_528861	Telangana	2020-07-14	20B	B.1.1.340	GR	Others	NA
EPI_ISL_528862	Telangana	2020-07-14	20B	B.1.1.326	GR	Others	NA
EPI_ISL_528863	Telangana	2020-07-14	20B	B.1.1.306	GR	Others	NA
EPI_ISL_528864	Telangana	2020-07-14	20B	B.1.1.306	GR	Others	NA
EPI_ISL_528865	Telangana	2020-07-14	20B	B.1.1.326	GR	Others	NA
EPI_ISL_528866	Telangana	2020-07-14	20B	B.1.1.326	GR	Others	NA
EPI_ISL_528867	Telangana	2020-07-14	20B	B.1.1.326	GR	Others	NA
EPI_ISL_528868	Telangana	2020-07-14	20B	B.1.1.326	GR	Others	NA
EPI_ISL_528869	Telangana	2020-07-14	20B	B.1.1.326	GR	Others	NA
EPI_ISL_700300	Maharashtra	2020-09-18	20B	B.1.1.306	GR	Others	NA
EPI_ISL_700302	Maharashtra	2020-09-18	20B	B.1.1.306	GR	Others	NA
EPI_ISL_700304	Maharashtra	2020-09-19	20B	B.1.1.306	GR	Others	NA
EPI_ISL_700305	Maharashtra	2020-09-19	20A	B.1	G	Others	NA
EPI_ISL_700306	Uttar_Pradesh	2020-09-19	20A	B.1.36	GH	Others	NA
EPI_ISL_700309	Maharashtra	2020-09-22	20B	B.1.1.306	GR	Others	NA
EPI_ISL_700310	Maharashtra	2020-09-22	20B	B.1.1.306	GR	Others	NA
EPI_ISL_700311	West_Bengal	2020-09-23	20B	B.1.1.216	GR	Others	NA
EPI_ISL_700312	Maharashtra	2020-09-23	20B	B.1.1.306	GR	Others	NA
EPI_ISL_700313	Odisha	2020-09-24	20B	B.1.1	GR	Others	NA
EPI_ISL_700314	Maharashtra	2020-09-24	20B	B.1.1	GR	Others	NA
EPI_ISL_700315	Maharashtra	2020-09-24	20B	B.1.1.306	GR	Others	NA
EPI_ISL_700316	Maharashtra	2020-09-24	20B	B.1.1.306	GR	Others	NA
EPI_ISL_700319	Maharashtra	2020-09-25	20B	B.1.1.216	GR	Others	NA
EPI_ISL_700320	Maharashtra	2020-09-25	20A	B.1	G	Others	NA
EPI_ISL_700321	Maharashtra	2020-09-25	20A	B.1.210	G	Others	NA
EPI_ISL_700322	Maharashtra	2020-09-25	20A	B.1.36.16	GH	Others	NA
EPI_ISL_700323	Maharashtra	2020-09-25	20A	B.1.210	G	Others	NA
EPI_ISL_700325	Maharashtra	2020-09-25	20B	B.1.1.306	GR	Others	NA
EPI_ISL_826274	Gujarat	2020-10-24	20A	B.1.36.8	GH	Others	NA
EPI_ISL_826275	Gujarat	2020-12-13	20A	B.1.36.8	GH	Others	NA
EPI_ISL_826276	Gujarat	2020-12-13	20A	B.1.36.8	GH	Others	NA
EPI_ISL_871790	Uttar_Pradesh	2020-08-25	20A	B.1.36	GH	Others	NA
EPI_ISL_910050	Telangana	2020-08-27	20B	B.1.1.326	GR	Others	NA
EPI_ISL_910051	Telangana	2020-08-27	20B	B.1.1.306	GR	Others	NA
EPI_ISL_910052	Telangana	2020-08-27	20B	B.1.1.326	GR	Others	NA
EPI_ISL_910053	Telangana	2020-08-27	20A	B.1.36.29	GH	Others	NA
EPI_ISL_910054	Telangana	2020-08-27	20B	B.1.1.306	GR	Others	NA
EPI_ISL_910055	Telangana	2020-08-27	20B	B.1.1.326	GR	Others	NA
EPI_ISL_910056	Telangana	2020-08-27	20B	B.1.1.306	GR	Others	NA
EPI_ISL_910057	Telangana	2020-08-27	20B	B.1.1.306	GR	Others	NA
EPI_ISL_910058	Telangana	2020-08-27	20B	B.1.1.306	GR	Others	NA
EPI_ISL_910060	Telangana	2020-08-28	20B	B.1.1.306	GR	Others	NA
EPI_ISL_910061	Telangana	2020-08-28	20B	B.1.1.326	GR	Others	NA
EPI_ISL_910062	Telangana	2020-08-28	20B	B.1.1.306	GR	Others	NA
EPI_ISL_910063	Telangana	2020-08-28	20A	B.1.36.8	GH	Others	NA
EPI_ISL_910064	Telangana	2020-08-28	20A	B.1.195	G	Others	NA
EPI_ISL_910065	Telangana	2020-08-28	20B	B.1.1.326	GR	Others	NA
EPI_ISL_910066	Telangana	2020-08-28	20B	B.1.1.326	GR	Others	NA
EPI_ISL_910067	Telangana	2020-08-28	20B	B.1.1.306	GR	Others	NA
EPI_ISL_910068	Telangana	2020-08-28	20B	B.1.1.326	GR	Others	NA
EPI_ISL_910069	Telangana	2020-08-28	20B	B.1.1.326	GR	Others	NA
EPI_ISL_910088	Telangana	2020-08-29	20B	B.1.1.326	GR	Others	NA
EPI_ISL_910089	Telangana	2020-08-29	20B	B.1.1.326	GR	Others	NA
EPI_ISL_910090	Telangana	2020-08-29	20B	B.1.1.306	GR	Others	NA
EPI_ISL_910091	Telangana	2020-08-29	20B	B.1.1.306	GR	Others	NA
EPI_ISL_910093	Telangana	2020-08-29	20B	B.1.1.306	GR	Others	NA
EPI_ISL_910094	Telangana	2020-08-29	20B	B.1.1.326	GR	Others	NA
EPI_ISL_910095	Telangana	2020-08-29	20B	B.1.1.326	GR	Others	NA
EPI_ISL_910097	Telangana	2020-08-30	20B	B.1.1.326	GR	Others	NA
EPI_ISL_910099	Telangana	2020-08-30	20B	B.1.1.306	GR	Others	NA
EPI_ISL_1063890	Odisha	2020-11-03	20B	B.1.1	GR	Others	NA
EPI_ISL_1063891	Odisha	2020-12-24	20B	B.1.1.216	GR	Others	NA
EPI_ISL_1063892	Odisha	2020-12-25	20B	B.1.1.216	GR	Others	NA
EPI_ISL_1063893	Odisha	2020-11-03	20B	B.1.1	GR	Others	NA
EPI_ISL_1063894	Odisha	2020-11-05	20B	B.1.1	GR	Others	NA
EPI_ISL_1063895	Odisha	2020-11-03	20B	B.1.1	GR	Others	NA
EPI_ISL_1063896	Odisha	2020-10-30	20B	B.1.1	GR	Others	NA
EPI_ISL_1063897	Odisha	2020-12-10	20B	B.1.1	GR	Others	NA
EPI_ISL_1063898	Odisha	2020-12-10	20B	B.1.1	GR	Others	NA
EPI_ISL_1063899	Odisha	2020-08-11	19A	B.1.153	G	Others	NA
EPI_ISL_1380270	Telangana	2020-11-12	20A	B.1.36.29	GH	Others	NA
EPI_ISL_1380271	Telangana	2020-11-12	20A	B.1.36.29	GH	Others	NA
EPI_ISL_1380272	Telangana	2020-11-12	20B	B.1.1	GR	Others	NA
EPI_ISL_1380273	Telangana	2020-11-12	20B	B.1.1.326	GR	Others	NA
EPI_ISL_1380274	Telangana	2020-11-13	20A	B.1.36.29	GH	Others	NA
EPI_ISL_1380279	Telangana	2020-11-13	20B	B.1.1.326	GR	Others	NA
EPI_ISL_1380280	Telangana	2020-11-14	20A	B.1.36.29	GH	Others	NA
EPI_ISL_1380281	Telangana	2020-11-14	20B	B.1.1.326	GR	Others	NA
EPI_ISL_1380282	Telangana	2020-11-14	20B	B.1.1.326	GR	Others	NA
EPI_ISL_1380285	Telangana	2020-11-17	20B	B.1.1	GR	Others	NA
EPI_ISL_1380286	Telangana	2020-11-17	20A	B.1.36.29	GH	Others	NA
EPI_ISL_1380287	Telangana	2020-11-17	20A	B.1.36	GH	Others	NA
EPI_ISL_1380288	Telangana	2020-11-17	20A	B.1.36.29	GH	Others	NA
EPI_ISL_1380289	Telangana	2020-11-18	20B	B.1.1	GR	Others	NA
EPI_ISL_1380290	Telangana	2020-11-18	20A	B.1.36.29	GH	Others	NA
EPI_ISL_1380291	Telangana	2020-11-18	20A	B.1.36.29	GH	Others	NA
EPI_ISL_1380292	Telangana	2020-11-18	20A	B.1.36.29	GH	Others	NA
EPI_ISL_1380293	Telangana	2020-11-18	20B	B.1.1	GR	Others	NA
EPI_ISL_1380294	Telangana	2020-11-18	20B	B.1.1.306	GR	Others	NA
EPI_ISL_1380295	Telangana	2020-11-18	20A	B.1.36.29	GH	Others	NA
EPI_ISL_1380296	Telangana	2020-11-18	20A	B.1.36.29	GH	Others	NA
EPI_ISL_1380297	Telangana	2020-11-18	20A	B.1.36.29	GH	Others	NA
EPI_ISL_1380298	Telangana	2020-11-19	20A	B.1.36.29	GH	Others	NA
EPI_ISL_1380299	Telangana	2020-11-19	20B	B.1.1.306	GR	Others	NA
EPI_ISL_1419410	West_Bengal	2021-02-22	20A	B.1.618	G	Others	NA
EPI_ISL_1419414	West_Bengal	2021-03-10	20I/501Y.V1	B.1.1.7	GRY	Alpha	VOC
EPI_ISL_1419416	West_Bengal	2021-03-12	20A	B.1.618	G	Others	NA
EPI_ISL_1419428	West_Bengal	2020-12-22	20I/501Y.V1	B.1.1.7	GRY	Alpha	VOC
EPI_ISL_1419429	West_Bengal	2021-01-02	20B	B.1.1	GR	Others	NA
EPI_ISL_1419430	West_Bengal	2021-01-29	20B	B.1.1	GR	Others	NA
EPI_ISL_1419431	West_Bengal	2021-01-30	20B	B.1.1	GR	Others	NA
EPI_ISL_1419433	West_Bengal	2021-01-02	20B	B.1.1	GR	Others	NA
EPI_ISL_1419436	West_Bengal	2021-01-27	20A	B.1.36.18	GH	Others	NA
EPI_ISL_1419438	West_Bengal	2020-12-18	20A	B.1	G	Others	NA
EPI_ISL_1419439	West_Bengal	2020-12-18	20A	B.1	G	Others	NA
EPI_ISL_1419440	West_Bengal	2020-12-01	20A	B.1.36	GH	Others	NA
EPI_ISL_1419441	West_Bengal	2021-01-22	20A	B.1.36	GH	Others	NA
EPI_ISL_1419443	West_Bengal	2021-01-23	20A	B.1.36.18	GH	Others	NA
EPI_ISL_1419444	West_Bengal	2021-01-21	20A	B.1.618	G	Others	NA
EPI_ISL_1419446	West_Bengal	2020-12-31	20B	B.1.1.216	GR	Others	NA
EPI_ISL_1419448	West_Bengal	2021-01-19	20B	B.1.1	GR	Others	NA
EPI_ISL_1419450	West_Bengal	2021-01-19	20B	B.1.1	GR	Others	NA
EPI_ISL_1419451	West_Bengal	2021-01-20	20B	B.1.1.216	GR	Others	NA
EPI_ISL_1419452	West_Bengal	2021-01-20	20B	B.1.1	GR	Others	NA
EPI_ISL_1419454	West_Bengal	2021-01-22	20B	B.1	G	Others	NA
EPI_ISL_1419455	West_Bengal	2021-01-22	20B	B.1	G	Others	NA
EPI_ISL_1419457	West_Bengal	2021-01-25	20A	B.1.36	GH	Others	NA
EPI_ISL_1419458	West_Bengal	2021-01-01	20B	B.1.1	GR	Others	NA
EPI_ISL_1419460	West_Bengal	2020-12-26	20B	B.1.1	GR	Others	NA
EPI_ISL_1419463	West_Bengal	2021-01-25	20B	B.1.1.25	GR	Others	NA
EPI_ISL_1419465	West_Bengal	2021-01-28	20A	B.1.36.29	GH	Others	NA
EPI_ISL_1419466	West_Bengal	2020-12-14	20B	B.1.1	GR	Others	NA
EPI_ISL_1419467	West_Bengal	2021-01-28	20B	B.1.1	GR	Others	NA
EPI_ISL_1419468	West_Bengal	2021-01-20	20B	B.1.1	GR	Others	NA
EPI_ISL_1419469	West_Bengal	2020-12-24	20B	B.1.1	GR	Others	NA
EPI_ISL_420543	NS	2020-03-03	20A	B.1	G	Others	NA
EPI_ISL_420545	NS	2020-03-03	20A	B.1	G	Others	NA
EPI_ISL_420547	NS	2020-03-03	20A	B.1	G	Others	NA
EPI_ISL_420549	NS	2020-03-03	20A	B.1	G	Others	NA
EPI_ISL_420551	NS	2020-03-03	20A	B.1	G	Others	NA
EPI_ISL_420553	NS	2020-03-03	20A	B.1	G	Others	NA
EPI_ISL_420555	NS	2020-03-03	20B	B.1.1	GR	Others	NA
EPI_ISL_486382	Karnataka	2020-04-14	19A	B.6	O	Others	NA
EPI_ISL_486388	Karnataka	2020-05-10	19A	B.6	O	Others	NA
EPI_ISL_486389	Karnataka	2020-05-10	19A	B.6	O	Others	NA
EPI_ISL_486392	Karnataka	2020-04-15	19A	B.6	O	Others	NA
EPI_ISL_486394	Karnataka	2020-04-23	19A	B.6	O	Others	NA
EPI_ISL_486398	Karnataka	2020-04-25	19A	B.6	O	Others	NA
EPI_ISL_486399	Karnataka	2020-04-29	19A	B.6	O	Others	NA
EPI_ISL_508210	Maharashtra	2020-06-17	20B	B.1.1.306	GR	Others	NA
EPI_ISL_508211	Maharashtra	2020-06-17	20B	B.1.1.306	GR	Others	NA
EPI_ISL_508212	Maharashtra	2020-06-17	20B	B.1.1.306	GR	Others	NA
EPI_ISL_508213	Maharashtra	2020-06-17	20B	B.1.1.306	GR	Others	NA
EPI_ISL_508214	Maharashtra	2020-06-17	20B	B.1.1.306	GR	Others	NA
EPI_ISL_508215	Maharashtra	2020-06-17	20B	B.1.1.306	GR	Others	NA
EPI_ISL_508216	Maharashtra	2020-06-17	20B	B.1.1.306	GR	Others	NA
EPI_ISL_508217	Maharashtra	2020-06-17	20B	B.1.1.306	GR	Others	NA
EPI_ISL_508218	Maharashtra	2020-06-17	20B	B.1.1.306	GR	Others	NA
EPI_ISL_508219	Maharashtra	2020-06-16	20B	B.1.1.306	GR	Others	NA
EPI_ISL_508220	Maharashtra	2020-06-16	20B	B.1.1.306	GR	Others	NA
EPI_ISL_508221	Maharashtra	2020-06-16	20B	B.1.1.306	GR	Others	NA
EPI_ISL_508222	Maharashtra	2020-06-16	20B	B.1.1.306	GR	Others	NA
EPI_ISL_508223	Maharashtra	2020-06-17	20B	B.1.1.306	GR	Others	NA
EPI_ISL_508224	Maharashtra	2020-06-17	20B	B.1.1.306	GR	Others	NA
EPI_ISL_508225	Maharashtra	2020-06-20	20B	B.1.1.306	GR	Others	NA
EPI_ISL_508226	Maharashtra	2020-06-20	20B	B.1.1.306	GR	Others	NA
EPI_ISL_508227	Maharashtra	2020-06-20	20B	B.1.1.306	GR	Others	NA
EPI_ISL_508228	Maharashtra	2020-06-20	20B	B.1.1.306	GR	Others	NA
EPI_ISL_508229	Maharashtra	2020-06-20	20B	B.1.1.306	GR	Others	NA
EPI_ISL_508230	Maharashtra	2020-06-20	20B	B.1.1.306	GR	Others	NA
EPI_ISL_508231	Maharashtra	2020-06-20	20B	B.1.1.306	GR	Others	NA
EPI_ISL_508232	Maharashtra	2020-06-20	20B	B.1.1.306	GR	Others	NA
EPI_ISL_508233	Maharashtra	2020-06-20	20B	B.1.1.306	GR	Others	NA
EPI_ISL_508234	Maharashtra	2020-06-17	20B	B.1.1.306	GR	Others	NA
EPI_ISL_508235	Maharashtra	2020-06-20	20B	B.1.1.306	GR	Others	NA
EPI_ISL_508236	Maharashtra	2020-06-20	20B	B.1.1.306	GR	Others	NA
EPI_ISL_508237	Maharashtra	2020-06-20	20B	B.1.1.306	GR	Others	NA
EPI_ISL_508238	Maharashtra	2020-06-20	20B	B.1.1.306	GR	Others	NA
EPI_ISL_508239	Maharashtra	2020-06-20	20B	B.1.1.306	GR	Others	NA
EPI_ISL_508240	Maharashtra	2020-06-20	20B	B.1.1.306	GR	Others	NA
EPI_ISL_508241	Maharashtra	2020-06-20	20B	B.1.1.306	GR	Others	NA
EPI_ISL_508242	Maharashtra	2020-06-20	20B	B.1.1.306	GR	Others	NA
EPI_ISL_508243	Maharashtra	2020-06-20	20B	B.1.1.306	GR	Others	NA
EPI_ISL_508244	Maharashtra	2020-06-17	20B	B.1.1.306	GR	Others	NA
EPI_ISL_508245	Maharashtra	2020-06-20	20B	B.1.1.306	GR	Others	NA
EPI_ISL_508246	Maharashtra	2020-06-20	20B	B.1.1.306	GR	Others	NA
EPI_ISL_508247	Maharashtra	2020-06-20	20B	B.1.1.306	GR	Others	NA
EPI_ISL_508248	Maharashtra	2020-06-20	20B	B.1.1.306	GR	Others	NA
EPI_ISL_508249	Maharashtra	2020-06-20	20B	B.1.1.306	GR	Others	NA
EPI_ISL_508250	Maharashtra	2020-06-20	20B	B.1.1.306	GR	Others	NA
EPI_ISL_508251	Maharashtra	2020-06-20	20B	B.1.1.306	GR	Others	NA
EPI_ISL_508252	Maharashtra	2020-06-20	20B	B.1.1.306	GR	Others	NA
EPI_ISL_508253	Maharashtra	2020-06-20	20B	B.1.1.306	GR	Others	NA
EPI_ISL_508254	Maharashtra	2020-06-17	20B	B.1.1.306	GR	Others	NA
EPI_ISL_508255	Maharashtra	2020-06-20	20B	B.1.1.306	GR	Others	NA
EPI_ISL_508256	Maharashtra	2020-06-20	20B	B.1.1.306	GR	Others	NA
EPI_ISL_508257	Maharashtra	2020-06-20	20B	B.1.1.306	GR	Others	NA
EPI_ISL_508258	Maharashtra	2020-06-20	20B	B.1.1.306	GR	Others	NA
EPI_ISL_508259	Maharashtra	2020-06-18	20B	B.1.1.306	GR	Others	NA
EPI_ISL_508260	Maharashtra	2020-06-18	20B	B.1.1.306	GR	Others	NA
EPI_ISL_508261	Maharashtra	2020-06-18	20B	B.1.1.306	GR	Others	NA
EPI_ISL_508262	Maharashtra	2020-06-18	20B	B.1.1.306	GR	Others	NA
EPI_ISL_508263	Maharashtra	2020-06-18	20B	B.1.1.306	GR	Others	NA
EPI_ISL_508264	Maharashtra	2020-06-17	20B	B.1.1.306	GR	Others	NA
EPI_ISL_508265	Maharashtra	2020-06-18	20B	B.1.1.306	GR	Others	NA
EPI_ISL_508266	Maharashtra	2020-06-18	20B	B.1.1.28	GR	Others	NA
EPI_ISL_508267	Maharashtra	2020-06-18	20B	B.1.1.306	GR	Others	NA
EPI_ISL_508268	Maharashtra	2020-06-18	20B	B.1.1.306	GR	Others	NA
EPI_ISL_508269	Maharashtra	2020-06-18	20B	B.1.1.306	GR	Others	NA
EPI_ISL_508270	Maharashtra	2020-06-18	20B	B.1.1.306	GR	Others	NA
EPI_ISL_508271	Maharashtra	2020-06-18	20B	B.1.1.306	GR	Others	NA
EPI_ISL_508272	Maharashtra	2020-06-18	20B	B.1.1.306	GR	Others	NA
EPI_ISL_508273	Maharashtra	2020-06-18	20B	B.1.1.306	GR	Others	NA
EPI_ISL_508274	Maharashtra	2020-06-17	20B	B.1.1.306	GR	Others	NA
EPI_ISL_508275	Maharashtra	2020-06-18	20B	B.1.1.306	GR	Others	NA
EPI_ISL_508276	Maharashtra	2020-06-18	20B	B.1.1.306	GR	Others	NA
EPI_ISL_508277	Maharashtra	2020-06-18	20B	B.1.1.306	GR	Others	NA
EPI_ISL_508278	Maharashtra	2020-06-18	20B	B.1.1.306	GR	Others	NA
EPI_ISL_508279	Maharashtra	2020-06-18	20B	B.1.1.306	GR	Others	NA
EPI_ISL_508280	Maharashtra	2020-06-18	20B	B.1.1.306	GR	Others	NA
EPI_ISL_508281	Maharashtra	2020-06-18	20B	B.1.1.306	GR	Others	NA
EPI_ISL_508282	Maharashtra	2020-06-15	20B	B.1.1.306	GR	Others	NA
EPI_ISL_508283	Maharashtra	2020-06-15	20B	B.1.1.306	GR	Others	NA
EPI_ISL_508284	Maharashtra	2020-06-17	20B	B.1.1.306	GR	Others	NA
EPI_ISL_508285	Maharashtra	2020-06-17	20B	B.1.1.306	GR	Others	NA
EPI_ISL_508286	Maharashtra	2020-06-17	20B	B.1.1.306	GR	Others	NA
EPI_ISL_508287	Karnataka	2020-06-19	20B	B.1.1.46	GR	Others	NA
EPI_ISL_508288	Karnataka	2020-06-20	20B	B.1.1	GR	Others	NA
EPI_ISL_508289	Karnataka	2020-06-17	20B	B.1.1.46	GR	Others	NA
EPI_ISL_511899	West_Bengal	2020-05-26	20A	B.1	G	Others	NA
EPI_ISL_910071	Telangana	2020-08-28	20A	B.1.36.29	GH	Others	NA
EPI_ISL_910072	Telangana	2020-08-28	20C	B.1.369	GH	Others	NA
EPI_ISL_910073	Telangana	2020-08-28	20B	B.1.1.326	GR	Others	NA
EPI_ISL_910074	Telangana	2020-08-29	20B	B.1.1.306	GR	Others	NA
EPI_ISL_910076	Telangana	2020-08-29	20B	B.1.1.306	GR	Others	NA
EPI_ISL_910077	Telangana	2020-08-29	20C	B.1.369	GH	Others	NA
EPI_ISL_910078	Telangana	2020-08-29	20B	B.1.1.326	GR	Others	NA
EPI_ISL_910079	Telangana	2020-08-29	20B	B.1.1.306	GR	Others	NA
EPI_ISL_910080	Telangana	2020-08-29	20B	B.1.1.326	GR	Others	NA
EPI_ISL_910081	Telangana	2020-08-29	20A	B.1.36.8	GH	Others	NA
EPI_ISL_910082	Telangana	2020-08-29	20B	B.1.1.326	GR	Others	NA
EPI_ISL_910083	Telangana	2020-08-29	20B	B.1.1.306	GR	Others	NA
EPI_ISL_910084	Telangana	2020-08-29	20B	B.1.1.306	GR	Others	NA
EPI_ISL_910085	Telangana	2020-08-29	20B	B.1.1.326	GR	Others	NA
EPI_ISL_910086	Telangana	2020-08-29	20B	B.1.1.326	GR	Others	NA
EPI_ISL_910087	Telangana	2020-08-29	20B	B.1.1.306	GR	Others	NA
EPI_ISL_910208	Telangana	2020-09-17	20B	B.1.1.306	GR	Others	NA
EPI_ISL_910209	Telangana	2020-09-17	20B	B.1.1.306	GR	Others	NA
EPI_ISL_910210	Telangana	2020-09-17	20B	B.1.1.306	GR	Others	NA
EPI_ISL_910211	Telangana	2020-09-18	20B	B.1.1.306	GR	Others	NA
EPI_ISL_910212	Telangana	2020-09-18	20B	B.1.1.306	GR	Others	NA
EPI_ISL_910213	Telangana	2020-09-18	20B	B.1.1.326	GR	Others	NA
EPI_ISL_910214	Telangana	2020-09-18	20A	B.1.36.8	GH	Others	NA
EPI_ISL_910215	Telangana	2020-09-19	20A	B.1.36.29	GH	Others	NA
EPI_ISL_910216	Telangana	2020-09-19	20A	B.1.36.29	GH	Others	NA
EPI_ISL_910217	Telangana	2020-09-19	20B	B.1.1.306	GR	Others	NA
EPI_ISL_910218	Telangana	2020-09-19	20B	B.1.1.306	GR	Others	NA
EPI_ISL_910219	Telangana	2020-09-19	20B	B.1.1.326	GR	Others	NA
EPI_ISL_910220	Telangana	2020-09-19	20A	B.1.36.29	GH	Others	NA
EPI_ISL_910221	Telangana	2020-09-19	20B	B.1.1	GR	Others	NA
EPI_ISL_910223	Telangana	2020-09-20	20B	B.1.1.306	GR	Others	NA
EPI_ISL_910224	Telangana	2020-09-20	20B	B.1.1.306	GR	Others	NA
EPI_ISL_910225	Telangana	2020-09-20	20A	B.1.36.29	GH	Others	NA
EPI_ISL_910226	Telangana	2020-09-21	20A	B.1.537	G	Others	NA
EPI_ISL_910227	Telangana	2020-09-21	20B	B.1.1.326	GR	Others	NA
EPI_ISL_910228	Telangana	2020-09-21	20B	B.1.1.306	GR	Others	NA
EPI_ISL_910230	Telangana	2020-09-21	20B	B.1.1.306	GR	Others	NA
EPI_ISL_910231	Telangana	2020-09-21	20A	B.1.36.29	GH	Others	NA
EPI_ISL_910232	Telangana	2020-09-22	20B	B.1.1.216	GR	Others	NA
EPI_ISL_910233	Telangana	2020-09-22	20B	B.1.1.326	GR	Others	NA
EPI_ISL_910234	Telangana	2020-09-22	20A	B.1.36.29	GH	Others	NA
EPI_ISL_910235	Telangana	2020-09-22	20A	B.1.36.29	GH	Others	NA
EPI_ISL_910236	Telangana	2020-09-22	20B	B.1.1.326	GR	Others	NA
EPI_ISL_910237	Telangana	2020-09-22	20B	B.1.1.326	GR	Others	NA
EPI_ISL_910238	Telangana	2020-09-22	20A	B.1.36.29	GH	Others	NA
EPI_ISL_910239	Telangana	2020-09-22	20A	B.1.36.29	GH	Others	NA
EPI_ISL_910240	Telangana	2020-09-22	20A	B.1.36.29	GH	Others	NA
EPI_ISL_910241	Telangana	2020-09-23	20B	B.1.1.326	GR	Others	NA
EPI_ISL_910243	Telangana	2020-09-24	20B	B.1.1.326	GR	Others	NA
EPI_ISL_910244	Telangana	2020-09-24	20B	B.1.1.326	GR	Others	NA
EPI_ISL_910245	Telangana	2020-09-24	20B	B.1.1.326	GR	Others	NA
EPI_ISL_910246	Telangana	2020-09-24	20B	B.1.1.326	GR	Others	NA
EPI_ISL_910247	Telangana	2020-09-24	20B	B.1.1.306	GR	Others	NA
EPI_ISL_910250	Telangana	2020-09-24	20B	B.1.1	GR	Others	NA
EPI_ISL_910251	Telangana	2020-09-24	20B	B.1.1.326	GR	Others	NA
EPI_ISL_910254	Telangana	2020-09-25	20B	B.1.1.326	GR	Others	NA
EPI_ISL_910255	Telangana	2020-09-25	20B	B.1.1.326	GR	Others	NA
EPI_ISL_910257	Telangana	2020-09-25	20B	B.1.1.306	GR	Others	NA
EPI_ISL_910259	Telangana	2020-09-25	20B	B.1.1.306	GR	Others	NA
EPI_ISL_910260	Telangana	2020-09-25	20B	B.1.1.306	GR	Others	NA
EPI_ISL_910265	Telangana	2020-09-26	20A	B.1.36.29	GH	Others	NA
EPI_ISL_910266	Telangana	2020-09-26	20A	B.1.36.29	GH	Others	NA
EPI_ISL_910267	Telangana	2020-09-26	20B	B.1.1.326	GR	Others	NA
EPI_ISL_910269	Telangana	2020-09-26	20A	B.1.36.29	GH	Others	NA
EPI_ISL_910270	Telangana	2020-09-26	20B	B.1.1.306	GR	Others	NA
EPI_ISL_910271	Telangana	2020-09-28	20B	B.1.1.326	GR	Others	NA
EPI_ISL_910272	Telangana	2020-09-28	20B	B.1.1.326	GR	Others	NA
EPI_ISL_910273	Telangana	2020-09-28	20B	B.1.1.326	GR	Others	NA
EPI_ISL_910274	Telangana	2020-09-28	20B	B.1.1.306	GR	Others	NA
EPI_ISL_910275	Telangana	2020-09-28	20B	B.1.1.326	GR	Others	NA
EPI_ISL_910279	Telangana	2020-09-28	20A	B.1.540	G	Others	NA
EPI_ISL_910280	Telangana	2020-09-28	20B	B.1.1.326	GR	Others	NA
EPI_ISL_910282	Telangana	2020-09-29	20B	B.1.1.326	GR	Others	NA
EPI_ISL_910283	Telangana	2020-09-29	20B	B.1.1.306	GR	Others	NA
EPI_ISL_910284	Telangana	2020-09-29	20B	B.1.1.306	GR	Others	NA
EPI_ISL_910285	Telangana	2020-09-29	20A	B.1.36.29	GH	Others	NA
EPI_ISL_910286	Telangana	2020-09-29	20B	B.1.1.326	GR	Others	NA
EPI_ISL_910288	Telangana	2020-09-29	20A	B.1.36.8	GH	Others	NA
EPI_ISL_910289	Telangana	2020-09-29	20B	B.1.1.326	GR	Others	NA
EPI_ISL_1055383	Maharashtra	2020-03-10	20A	B.1.210	G	Others	NA
EPI_ISL_1055384	Maharashtra	2020-03-19	19A	B.6.6	O	Others	NA
EPI_ISL_1063846	Odisha	2020-12-18	20B	B.1.1	GR	Others	NA
EPI_ISL_1063847	Odisha	2020-12-19	20A	B	O	Others	NA
EPI_ISL_1063848	Odisha	2020-12-21	20A	B.1.1.340	O	Others	NA
EPI_ISL_1063849	Odisha	2020-12-21	20B	B.1.1.274	GR	Others	NA
EPI_ISL_1063850	Odisha	2020-12-21	20B	B.1.1.274	GR	Others	NA
EPI_ISL_1063851	Odisha	2020-12-22	20B	B.1.1.148	GR	Others	NA
EPI_ISL_1063852	Odisha	2021-01-02	20B	B.1.1.216	GR	Others	NA
EPI_ISL_1063853	Odisha	2021-01-02	20A	B.1.36	GH	Others	NA
EPI_ISL_1063854	Odisha	2021-01-02	20A	B.1.36	GH	Others	NA
EPI_ISL_1063855	Odisha	2020-12-16	20A	B.1.36	GH	Others	NA
EPI_ISL_1063856	Odisha	2021-01-28	20B	B.1.1.216	GR	Others	NA
EPI_ISL_1063857	Odisha	2021-01-22	20A	B.1.36	GH	Others	NA
EPI_ISL_1063858	Odisha	2021-01-05	20A	B.1.36	GH	Others	NA
EPI_ISL_1063859	Odisha	2021-01-21	20B	B.1.1	GR	Others	NA
EPI_ISL_1063860	Odisha	2021-01-19	20B	B.1.1	GR	Others	NA
EPI_ISL_1063861	Odisha	2021-01-21	20B	B.1.1	GR	Others	NA
EPI_ISL_1063862	Odisha	2020-11-03	20B	B.1.1.216	GR	Others	NA
EPI_ISL_1063863	Odisha	2020-11-03	20B	B.1.1	O	Others	NA
EPI_ISL_1063864	Odisha	2020-11-03	20B	B.1.1	GR	Others	NA
EPI_ISL_1063865	Odisha	2020-11-03	20A	B.1.36.29	GH	Others	NA
EPI_ISL_1063866	Odisha	2020-11-03	20B	B.1.1	GR	Others	NA
EPI_ISL_1063867	Odisha	2020-11-03	20B	B.1.1	GR	Others	NA
EPI_ISL_1380201	Telangana	2020-10-16	20A	B.1.36.29	GH	Others	NA
EPI_ISL_1380202	Telangana	2020-10-16	20A	B.1.195	G	Others	NA
EPI_ISL_1380203	Telangana	2020-10-16	20B	B.1.1	GR	Others	NA
EPI_ISL_1380204	Telangana	2020-10-16	20B	B.1.1	GR	Others	NA
EPI_ISL_1380205	Telangana	2020-10-16	20B	B.1.1	GR	Others	NA
EPI_ISL_1380207	Telangana	2020-10-16	20A	B.1.36.29	GH	Others	NA
EPI_ISL_1380208	Telangana	2020-10-16	20B	B.1.1	GR	Others	NA
EPI_ISL_1380209	Telangana	2020-10-16	20A	B.1.36.29	GH	Others	NA
EPI_ISL_1380210	Telangana	2020-10-16	20A	B.1.36.29	GH	Others	NA
EPI_ISL_1380211	Telangana	2020-10-16	20A	B.1.36.29	GH	Others	NA
EPI_ISL_1380213	Telangana	2020-10-17	20A	B.1.36.29	GH	Others	NA
EPI_ISL_1380214	Telangana	2020-10-17	20B	B.1.1.306	GR	Others	NA
EPI_ISL_1380215	Telangana	2020-10-17	20B	B.1.1.306	GR	Others	NA
EPI_ISL_1380217	Telangana	2020-10-17	20A	B.1.36.29	GH	Others	NA
EPI_ISL_1380218	Telangana	2020-10-17	20A	B.1.36.29	GH	Others	NA
EPI_ISL_1380220	Telangana	2020-11-01	20A	B.1.36.29	GH	Others	NA
EPI_ISL_1380221	Telangana	2020-11-01	20A	B.1.195	G	Others	NA
EPI_ISL_1380222	Telangana	2020-11-01	20A	B.1.36.29	GH	Others	NA
EPI_ISL_1380223	Telangana	2020-11-01	20A	B.1.36	GH	Others	NA
EPI_ISL_1380224	Telangana	2020-11-01	20A	B.1.36.29	GH	Others	NA
EPI_ISL_1380225	Telangana	2020-11-01	20B	B.1.1	GR	Others	NA
EPI_ISL_1380226	Telangana	2020-11-01	20A	B.1.36.29	GH	Others	NA
EPI_ISL_1380227	Telangana	2020-11-01	20B	B.1.1.326	GR	Others	NA
EPI_ISL_1380228	Telangana	2020-11-03	20C	B.1.369	GH	Others	NA
EPI_ISL_1380229	Telangana	2020-11-03	20A	B.1.36.29	GH	Others	NA
EPI_ISL_1380230	Telangana	2020-11-03	20A	B.1.36.29	GH	Others	NA
EPI_ISL_1380231	Telangana	2020-11-03	20A	B.1.36.29	GH	Others	NA
EPI_ISL_1380232	Telangana	2020-11-03	20A	B.1.36.29	GH	Others	NA
EPI_ISL_1380233	Telangana	2020-11-03	20A	B.1.36.29	GH	Others	NA
EPI_ISL_1380234	Telangana	2020-11-03	20A	B.1.36.29	GH	Others	NA
EPI_ISL_1380235	Telangana	2020-11-03	20A	B.1.36.29	GH	Others	NA
EPI_ISL_1380236	Telangana	2020-11-03	20A	B.1.36.29	GH	Others	NA
EPI_ISL_1380237	Telangana	2020-11-04	20A	B.1.36.29	GH	Others	NA
EPI_ISL_1380238	Telangana	2020-11-04	20B	B.1.1	GR	Others	NA
EPI_ISL_1380239	Telangana	2020-11-04	20A	B.1.36.29	GH	Others	NA
EPI_ISL_1380240	Telangana	2020-11-04	20A	B.1.36.29	GH	Others	NA
EPI_ISL_1380241	Telangana	2020-11-04	20B	B.1.1	GR	Others	NA
EPI_ISL_1380242	Telangana	2020-11-04	20A	B.1.36.29	GH	Others	NA
EPI_ISL_1380243	Telangana	2020-11-04	20B	B.1.1.306	GR	Others	NA
EPI_ISL_1380244	Telangana	2020-11-05	20B	B.1.1.326	GR	Others	NA
EPI_ISL_1380245	Telangana	2020-11-05	20A	B.1.36.29	GH	Others	NA
EPI_ISL_1380246	Telangana	2020-11-05	20A	B.1.36.29	GH	Others	NA
EPI_ISL_1380247	Telangana	2020-11-05	20B	B.1.1.306	GR	Others	NA
EPI_ISL_1380248	Telangana	2020-11-05	20A	B.1.36.29	GH	Others	NA
EPI_ISL_1380249	Telangana	2020-11-05	20A	B.1.36.29	GH	Others	NA
EPI_ISL_1380250	Telangana	2020-11-05	20B	B.1.1.10	GR	Others	NA
EPI_ISL_1380251	Telangana	2020-11-06	20A	B.1.36.29	GH	Others	NA
EPI_ISL_1380252	Telangana	2020-11-06	20A	B.1.36.29	GH	Others	NA
EPI_ISL_1380253	Telangana	2020-11-06	20A	B.1.36.29	GH	Others	NA
EPI_ISL_1380254	Telangana	2020-11-06	20B	B.1.1.174	GR	Others	NA
EPI_ISL_1380255	Telangana	2020-11-06	20A	B.1.36.29	GH	Others	NA
EPI_ISL_1380256	Telangana	2020-11-06	20A	B.1.36.29	GH	Others	NA
EPI_ISL_1380257	Telangana	2020-11-07	20A	B.1.36.29	GH	Others	NA
EPI_ISL_1380258	Telangana	2020-11-08	20B	B.1.1.326	GR	Others	NA
EPI_ISL_1380259	Telangana	2020-11-08	20A	B.1.36.29	GH	Others	NA
EPI_ISL_1380260	Telangana	2020-11-08	20A	B.1.36.29	G	Others	NA
EPI_ISL_1380261	Telangana	2020-11-08	20A	B.1.36.29	GH	Others	NA
EPI_ISL_1380262	Telangana	2020-11-08	20B	B.1.1	GR	Others	NA
EPI_ISL_1380263	Telangana	2020-11-08	20A	B.1.36.29	GH	Others	NA
EPI_ISL_1380264	Telangana	2020-11-08	20A	B.1.36.29	GH	Others	NA
EPI_ISL_1380265	Telangana	2020-11-08	20A	B.1.36.29	GH	Others	NA
EPI_ISL_1380266	Telangana	2020-11-08	20B	B.1.1.326	GR	Others	NA
EPI_ISL_1380267	Telangana	2020-11-10	20A	B.1.36.29	GH	Others	NA
EPI_ISL_1380268	Telangana	2020-11-10	20A	B.1.36.29	GH	Others	NA
EPI_ISL_1380269	Telangana	2020-11-11	20A	B.1.36.29	GH	Others	NA
EPI_ISL_1380275	Telangana	2020-11-13	20A	B.1.36.29	GH	Others	NA
EPI_ISL_1380276	Telangana	2020-11-13	20A	B.1.36.29	GH	Others	NA
EPI_ISL_1380278	Telangana	2020-11-13	20B	B.1.1.306	GR	Others	NA
EPI_ISL_1419472	West_Bengal	2021-01-27	20B	B.1.1.25	GR	Others	NA
EPI_ISL_1419475	West_Bengal	2021-01-25	20B	B.1.1	GR	Others	NA
EPI_ISL_1419476	West_Bengal	2021-01-25	20B	B.1.1	GR	Others	NA
EPI_ISL_1419477	West_Bengal	2020-12-24	20B	B.1.1	GR	Others	NA
EPI_ISL_1419478	West_Bengal	2021-01-27	20B	B.1.1	GR	Others	NA
EPI_ISL_1419480	West_Bengal	2021-01-27	20B	B.1.1	GR	Others	NA
EPI_ISL_1419482	West_Bengal	2021-01-28	20A	B.1.618	G	Others	NA
EPI_ISL_1419483	West_Bengal	2021-01-29	20B	B.1.1.25	GR	Others	NA
EPI_ISL_1419485	West_Bengal	2021-02-16	20A	B.1.618	G	Others	NA
EPI_ISL_1419486	West_Bengal	2020-11-04	20A	B.1.36	GH	Others	NA
EPI_ISL_1419488	West_Bengal	2020-11-05	20A	B.1.36	GH	Others	NA
EPI_ISL_444460	Gujarat	2020-04-30	20A	B.1	G	Others	NA
EPI_ISL_444461	Gujarat	2020-04-29	20A	B.1.36.8	GH	Others	NA
EPI_ISL_444462	Gujarat	2020-04-29	20A	B.1.145	G	Others	NA
EPI_ISL_444463	Gujarat	2020-04-29	20A	B.1	G	Others	NA
EPI_ISL_444467	Gujarat	2020-04-29	20A	B.1	GH	Others	NA
EPI_ISL_444479	Gujarat	2020-04-29	20A	B.1	G	Others	NA
EPI_ISL_444480	Gujarat	2020-04-30	20A	B.1	GH	Others	NA
EPI_ISL_444481	Gujarat	2020-04-30	20A	B.1	G	Others	NA
EPI_ISL_444482	Gujarat	2020-05-02	20A	B.1	GH	Others	NA
EPI_ISL_444483	Gujarat	2020-05-02	20A	B.1	G	Others	NA
EPI_ISL_444484	Gujarat	2020-05-04	20A	B.1.247	GH	Others	NA
EPI_ISL_444485	Gujarat	2020-05-04	20A	B.1.247	GH	Others	NA
EPI_ISL_444486	Gujarat	2020-05-04	20A	B.1.36.8	GH	Others	NA
EPI_ISL_450321	Maharashtra	2020-04-04	19A	B.6	O	Others	NA
EPI_ISL_450322	Maharashtra	2020-04-04	19A	B.6	O	Others	NA
EPI_ISL_450323	Maharashtra	2020-03-27	20A	B.1	G	Others	NA
EPI_ISL_450324	Maharashtra	2020-03-26	19B	A	S	Others	NA
EPI_ISL_450325	Maharashtra	2020-03-17	20A	B.1	G	Others	NA
EPI_ISL_450326	Telangana	2020-04-01	19A	B.6.6	O	Others	NA
EPI_ISL_450327	Telangana	2020-04-01	19A	B.6	O	Others	NA
EPI_ISL_450328	Telangana	2020-04-01	19A	B.6	O	Others	NA
EPI_ISL_450329	Telangana	2020-04-01	19A	B.6	O	Others	NA
EPI_ISL_450330	Telangana	2020-04-02	19A	B.6	O	Others	NA
EPI_ISL_450331	Telangana	2020-04-01	19A	B.6	O	Others	NA
EPI_ISL_450332	Telangana	2020-04-01	19A	B.6	O	Others	NA
EPI_ISL_508290	Karnataka	2020-06-21	20B	B.1.1	GR	Others	NA
EPI_ISL_508291	Karnataka	2020-06-15	20B	B.1.1.46	GR	Others	NA
EPI_ISL_508292	Karnataka	2020-06-18	19A	B.6	O	Others	NA
EPI_ISL_508293	Karnataka	2020-06-15	20B	B.1.1.46	GR	Others	NA
EPI_ISL_508294	Karnataka	2020-06-15	20B	B.1.1.46	GR	Others	NA
EPI_ISL_508295	Karnataka	2020-06-20	20B	B.1.1.46	GR	Others	NA
EPI_ISL_508296	Karnataka	2020-06-15	20B	B.1.1.46	GR	Others	NA
EPI_ISL_508297	Karnataka	2020-06-17	20B	B.1.1.46	GR	Others	NA
EPI_ISL_508298	Karnataka	2020-06-21	20B	B.1.1.46	GR	Others	NA
EPI_ISL_508299	Karnataka	2020-06-17	20B	B.1.1.46	GR	Others	NA
EPI_ISL_508310	Karnataka	2020-06-03	20B	B.1.1.46	GR	Others	NA
EPI_ISL_508311	Karnataka	2020-06-18	20B	B.1.1.46	GR	Others	NA
EPI_ISL_508312	Karnataka	2020-06-20	20B	B.1.1.46	GR	Others	NA
EPI_ISL_508313	Karnataka	2020-06-15	20B	B.1.1.46	GR	Others	NA
EPI_ISL_508315	Karnataka	2020-06-10	20B	B.1.1.46	GR	Others	NA
EPI_ISL_508316	Karnataka	2020-06-15	20B	B.1.1	GR	Others	NA
EPI_ISL_508317	Karnataka	2020-06-17	20B	B.1.1.46	GR	Others	NA
EPI_ISL_508318	Karnataka	2020-06-17	20B	B.1.1.46	GR	Others	NA
EPI_ISL_508319	Karnataka	2020-06-15	20B	B.1.1.46	GR	Others	NA
EPI_ISL_508320	Karnataka	2020-06-04	20B	B.1.1	GR	Others	NA
EPI_ISL_508321	Karnataka	2020-06-15	20B	B.1.1.46	GR	Others	NA
EPI_ISL_508322	Karnataka	2020-06-17	20B	B.1.1.46	GR	Others	NA
EPI_ISL_508323	Karnataka	2020-06-15	20B	B.1.1	GR	Others	NA
EPI_ISL_508324	Karnataka	2020-05-09	20A	B.1.36.8	GH	Others	NA
EPI_ISL_508325	Karnataka	2020-06-03	19A	B.6	O	Others	NA
EPI_ISL_508326	Karnataka	2020-06-16	20B	B.1.1.46	GR	Others	NA
EPI_ISL_508327	Karnataka	2020-06-03	20B	B.1.1.46	GR	Others	NA
EPI_ISL_508328	Karnataka	2020-05-09	20B	B.1.1	GR	Others	NA
EPI_ISL_508329	Karnataka	2020-06-19	19A	B.6	O	Others	NA
EPI_ISL_511943	Haryana	2020-06-17	20A	B.1.36	GH	Others	NA
EPI_ISL_539483	Punjab	2020-04-27	19A	B.6	O	Others	NA
EPI_ISL_539486	Punjab	2020-04-30	19A	B.6	O	Others	NA
EPI_ISL_539487	Punjab	2020-05-30	19A	B.6	O	Others	NA
EPI_ISL_539491	Uttarakhand	2020-06-18	20A	B.1.36	GH	Others	NA
EPI_ISL_541701	Maharashtra	2020-08-04	20B	B.1.1	GR	Others	NA
EPI_ISL_541702	Maharashtra	2020-08-05	20B	B.1.1.306	GR	Others	NA
EPI_ISL_577678	Maharashtra	2020-09-17	20B	B.1.1.101	GR	Others	NA
EPI_ISL_577679	Maharashtra	2020-09-28	20B	B.1.1.306	GR	Others	NA
EPI_ISL_577680	Maharashtra	2020-09-28	20B	B.1.1.306	GR	Others	NA
EPI_ISL_577681	Maharashtra	2020-09-28	20B	B.1.1.306	GR	Others	NA
EPI_ISL_577682	Maharashtra	2020-09-29	20A	B.1	G	Others	NA
EPI_ISL_577683	Maharashtra	2020-09-28	20A	B.1.36.8	GH	Others	NA
EPI_ISL_577684	Maharashtra	2020-09-28	20B	B.1.1.306	GR	Others	NA
EPI_ISL_577685	Maharashtra	2020-09-28	20B	B.1.1.306	GR	Others	NA
EPI_ISL_577686	Maharashtra	2020-09-28	20B	B.1.1.306	GR	Others	NA
EPI_ISL_577688	Maharashtra	2020-09-28	20B	B.1.1.306	GR	Others	NA
EPI_ISL_577689	Maharashtra	2020-09-28	20B	B.1.1.306	GR	Others	NA
EPI_ISL_577690	Maharashtra	2020-09-28	20B	B.1.1.306	GR	Others	NA
EPI_ISL_577691	Maharashtra	2020-09-28	20B	B.1.1.306	GR	Others	NA
EPI_ISL_577692	Maharashtra	2020-09-29	20B	B.1.1.306	GR	Others	NA
EPI_ISL_577693	Maharashtra	2020-09-29	20B	B.1.1.306	GR	Others	NA
EPI_ISL_577695	Maharashtra	2020-09-29	20B	B.1.1.306	GR	Others	NA
EPI_ISL_577698	Maharashtra	2020-09-29	20B	B.1.1.306	GR	Others	NA
EPI_ISL_577699	Maharashtra	2020-09-29	20B	B.1.1.306	GR	Others	NA
EPI_ISL_577711	Maharashtra	2020-09-29	20B	B.1.1.306	GR	Others	NA
EPI_ISL_577712	Maharashtra	2020-09-29	20A	B.1	G	Others	NA
EPI_ISL_577713	Maharashtra	2020-09-28	20B	B.1.1.306	GR	Others	NA
EPI_ISL_577714	Karnataka	2020-09	20A	B.1.36	GH	Others	NA
EPI_ISL_577715	Karnataka	2020-09	20A	B.1.36.29	GH	Others	NA
EPI_ISL_577717	Maharashtra	2020-09-29	20B	B.1.1.306	GR	Others	NA
EPI_ISL_577718	Maharashtra	2020-09	20A	B.1	G	Others	NA
EPI_ISL_577719	Maharashtra	2020-09	20B	B.1.1.306	GR	Others	NA
EPI_ISL_577720	Maharashtra	2020-09-25	20B	B.1.1.306	GR	Others	NA
EPI_ISL_577722	Maharashtra	2020-09-26	20A	B.1.36	GH	Others	NA
EPI_ISL_577723	Maharashtra	2020-09-26	20B	B.1.1.306	GR	Others	NA
EPI_ISL_577725	Maharashtra	2020-07-21	20B	B.1.1.306	GR	Others	NA
EPI_ISL_577726	Maharashtra	2020-07-22	20B	B.1.1.306	GR	Others	NA
EPI_ISL_577727	Maharashtra	2020-09-08	20A	B.1.36	GH	Others	NA
EPI_ISL_577728	Maharashtra	2020-09-08	20B	B.1.1.306	GR	Others	NA
EPI_ISL_577729	Maharashtra	2020-07-25	20B	B.1.1.306	GR	Others	NA
EPI_ISL_577731	Maharashtra	2020-09-13	20B	B.1.1.306	GR	Others	NA
EPI_ISL_577732	Maharashtra	2020-09	20A	B.1	G	Others	NA
EPI_ISL_577733	Maharashtra	2020-09	20B	B.1.1.306	GR	Others	NA
EPI_ISL_755587	NS	2020-04-29	19A	B.6	O	Others	NA
EPI_ISL_825034	Gujarat	2020-11-20	20A	B.1.36	GH	Others	NA
EPI_ISL_825035	Gujarat	2020-11-19	20A	B.1.36	GH	Others	NA
EPI_ISL_825036	Gujarat	2020-12-03	20A	B.1.36	GH	Others	NA
EPI_ISL_825037	Gujarat	2020-11-10	20A	B.1	G	Others	NA
EPI_ISL_825038	Gujarat	2020-11-10	20A	B.1	G	Others	NA
EPI_ISL_825039	Gujarat	2020-11-10	20A	B.1	G	Others	NA
EPI_ISL_825040	Gujarat	2020-11-10	20A	B.1	G	Others	NA
EPI_ISL_825041	Gujarat	2020-11-10	20A	B.1	G	Others	NA
EPI_ISL_825042	Gujarat	2020-11-24	20A	B.1.36	GH	Others	NA
EPI_ISL_825044	Gujarat	2020-12-22	20I/501Y.V1	B.1.1.7	GRY	Alpha	VOC
EPI_ISL_825045	Gujarat	2020-12-22	20I/501Y.V1	B.1.1.7	GRY	Alpha	VOC
EPI_ISL_825046	Gujarat	2020-12-22	20A	B.1.258	G	Others	NA
EPI_ISL_825047	Gujarat	2020-12-22	20A	B.1.258	G	Others	NA
EPI_ISL_825048	Gujarat	2020-12-23	20B	B.1.1.306	GR	Others	NA
EPI_ISL_825049	Gujarat	2020-12-23	20B	B.1.1.306	GR	Others	NA
EPI_ISL_825050	Gujarat	2020-12-24	20I/501Y.V1	B.1.1.7	GRY	Alpha	VOC
EPI_ISL_825051	Gujarat	2020-12-24	20I/501Y.V1	B.1.1.7	GRY	Alpha	VOC
EPI_ISL_825052	Gujarat	2020-12-24	20I/501Y.V1	B.1.1.7	GRY	Alpha	VOC
EPI_ISL_825053	Gujarat	2020-12-24	20I/501Y.V1	B.1.1.7	GRY	Alpha	VOC
EPI_ISL_825054	Gujarat	2020-12-25	20I/501Y.V1	B.1.1.7	GR	Alpha	VOC
EPI_ISL_825055	Gujarat	2020-12-24	20B	B.1.1.306	GR	Others	NA
EPI_ISL_825056	Gujarat	2020-12-24	20B	B.1.1.306	GR	Others	NA
EPI_ISL_825057	Gujarat	2020-12-24	20B	B.1.1.306	GR	Others	NA
EPI_ISL_825058	Gujarat	2020-12-24	20B	B.1.1.306	GR	Others	NA
EPI_ISL_825059	Gujarat	2020-12-26	20I/501Y.V1	B.1.1.7	GR	Alpha	VOC
EPI_ISL_825060	Gujarat	2020-12-26	20I/501Y.V1	B.1.1.7	GRY	Alpha	VOC
EPI_ISL_825061	Gujarat	2020-12-29	20A	B.1.36.8	GH	Others	NA
EPI_ISL_825062	Gujarat	2020-12-29	20A	B.1.36.8	GH	Others	NA
EPI_ISL_825063	Gujarat	2020-12-30	20A	B.1.36.8	GH	Others	NA
EPI_ISL_910200	Telangana	2020-09-16	20B	B.1.1.326	GR	Others	NA
EPI_ISL_910201	Telangana	2020-09-16	20B	B.1.1.306	GR	Others	NA
EPI_ISL_910203	Telangana	2020-09-16	20B	B.1.1.306	GR	Others	NA
EPI_ISL_910204	Telangana	2020-09-16	20B	B.1.1.306	GR	Others	NA
EPI_ISL_910205	Telangana	2020-09-17	20B	B.1.1.306	GR	Others	NA
EPI_ISL_910207	Telangana	2020-09-17	20A	B.1.36.29	GH	Others	NA
EPI_ISL_1063806	Odisha	2021-01-21	20A	B.1.36.29	GH	Others	NA
EPI_ISL_1063807	Odisha	2020-12-20	20B	B.1.1.74	GR	Others	NA
EPI_ISL_1063808	Odisha	2020-11-09	20B	B.1.1.231	GR	Others	NA
EPI_ISL_1063809	Odisha	2020-12-18	20A	B.1	G	Others	NA
EPI_ISL_1063810	Odisha	2021-01-23	20A	B.1.36	GH	Others	NA
EPI_ISL_1063811	Odisha	2021-01-26	20A	B.1.36	GH	Others	NA
EPI_ISL_1063812	Odisha	2021-01-26	20A	B.1.36	GH	Others	NA
EPI_ISL_1063813	Odisha	2020-08-10	20B	B.1.1	GR	Others	NA
EPI_ISL_1063814	Odisha	2021-01-23	20A	B.1.36.29	GH	Others	NA
EPI_ISL_1063815	Odisha	2021-01-23	20A	B.1.36.29	GH	Others	NA
EPI_ISL_1063816	Odisha	2021-01-26	20A	B.1.36.29	GH	Others	NA
EPI_ISL_1063817	Odisha	2020-10-30	20B	B.1.1.46	GR	Others	NA
EPI_ISL_1063818	Odisha	2020-10-27	20B	B.1.1.46	GR	Others	NA
EPI_ISL_1063819	Odisha	2020-06-08	20C	B.1.369	GH	Others	NA
EPI_ISL_1063820	Odisha	2020-07-03	20B	B.1.1.101	GR	Others	NA
EPI_ISL_1063821	Odisha	2020-07-03	20B	B.1.1.116	GR	Others	NA
EPI_ISL_1063822	Odisha	2020-07-03	20B	B.1.1	GR	Others	NA
EPI_ISL_1063823	Odisha	2020-07-03	20B	B.1.1	GR	Others	NA
EPI_ISL_1063824	Odisha	2020-07-31	20B	B.1.1.306	GR	Others	NA
EPI_ISL_1063825	Odisha	2020-08-11	20B	B.1.1	GR	Others	NA
EPI_ISL_1063826	Odisha	2020-08-11	20B	B.1.1.306	GR	Others	NA
EPI_ISL_1063827	Odisha	2020-08-11	20B	B.1.1.306	GR	Others	NA
EPI_ISL_1063828	Odisha	2020-08-11	20B	B.1.1.306	GR	Others	NA
EPI_ISL_1063829	Odisha	2020-08-11	20B	B.1.1.46	GR	Others	NA
EPI_ISL_1063830	Odisha	2020-08-11	20A	B.1	G	Others	NA
EPI_ISL_1063831	Odisha	2020-08-11	20B	B.1.1.46	GR	Others	NA
EPI_ISL_1063832	Odisha	2020-08-10	20B	B.1.1	GR	Others	NA
EPI_ISL_1063833	Odisha	2020-08-10	20B	B.1.1	GR	Others	NA
EPI_ISL_1063834	Odisha	2020-08-10	20B	B.1.1	GR	Others	NA
EPI_ISL_1063835	Odisha	2020-09-10	20B	B.1.1	GR	Others	NA
EPI_ISL_1063836	Odisha	2020-08-10	20B	B.1.1	GR	Others	NA
EPI_ISL_1063837	Odisha	2020-08-11	20B	B.1.1	GR	Others	NA
EPI_ISL_1063838	Odisha	2020-08-11	20B	B.1.1	GR	Others	NA
EPI_ISL_1063839	Odisha	2020-08-11	20B	B.1.1	GR	Others	NA
EPI_ISL_1063840	Odisha	2020-12-16	20B	B.1.1.274	GR	Others	NA
EPI_ISL_1063841	Odisha	2020-12-17	20B	B.1.1.216	GR	Others	NA
EPI_ISL_1063842	Odisha	2020-12-17	20B	B.1.1.216	GR	Others	NA
EPI_ISL_1063843	Odisha	2020-12-17	20B	B.1.1	GR	Others	NA
EPI_ISL_1063844	Odisha	2020-12-18	20B	B.1.1	GR	Others	NA
EPI_ISL_1063845	Odisha	2020-12-18	20B	B.1.1	GR	Others	NA
EPI_ISL_1063868	Odisha	2020-11-03	20B	B.1.1	GR	Others	NA
EPI_ISL_1063869	Odisha	2020-11-08	20B	B.1.1	GR	Others	NA
EPI_ISL_1063870	Odisha	2020-11-08	20B	B.1.1.216	GR	Others	NA
EPI_ISL_1063871	Odisha	2020-11-08	20B	B.1.1.46	GR	Others	NA
EPI_ISL_1063872	Odisha	2020-11-08	20B	B.1.1.216	GR	Others	NA
EPI_ISL_1063873	Odisha	2020-11-17	20C	B.1.369	G	Others	NA
EPI_ISL_1063874	Odisha	2020-11-17	20B	B.1.1	GR	Others	NA
EPI_ISL_1063875	Odisha	2020-11-17	20B	B.1.1	GR	Others	NA
EPI_ISL_1063876	Odisha	2020-11-17	20B	B.1.1	GR	Others	NA
EPI_ISL_1063877	Odisha	2021-01-23	20B	B.1.1.46	GR	Others	NA
EPI_ISL_1063878	Odisha	2020-11-02	20B	B.1.1	GR	Others	NA
EPI_ISL_1063879	Odisha	2020-11-09	20B	B.1.1	GR	Others	NA
EPI_ISL_1063880	Odisha	2020-11-09	20B	B.1.1	GR	Others	NA
EPI_ISL_1063881	Odisha	2020-11-09	20B	B.1.1	GR	Others	NA
EPI_ISL_1063882	Odisha	2020-11-09	20B	B.1.1	GR	Others	NA
EPI_ISL_1063883	Odisha	2020-11-09	20B	B.1.1	GR	Others	NA
EPI_ISL_1063884	Odisha	2020-11-09	20B	B.1.1	GR	Others	NA
EPI_ISL_1063885	Odisha	2020-11-09	20B	B.1.1.306	GR	Others	NA
EPI_ISL_1063886	Odisha	2020-11-09	20B	B.1.1	GR	Others	NA
EPI_ISL_1063887	Odisha	2020-11-10	20A	B.1	G	Others	NA
EPI_ISL_1063888	Odisha	2020-11-02	20B	B.1.1	GR	Others	NA
EPI_ISL_1063889	Odisha	2020-11-03	20B	B.1.1	GR	Others	NA
EPI_ISL_1380181	Telangana	2020-10-13	20A	B.1.36.29	GH	Others	NA
EPI_ISL_1380183	Telangana	2020-10-13	20B	B.1.1.326	GR	Others	NA
EPI_ISL_1380184	Telangana	2020-10-13	20B	B.1.1	GR	Others	NA
EPI_ISL_1380186	Telangana	2020-10-13	20A	B.1.195	G	Others	NA
EPI_ISL_1380187	Telangana	2020-10-13	20B	B.1.1.306	GR	Others	NA
EPI_ISL_1380190	Telangana	2020-10-14	20B	B.1.1.326	GR	Others	NA
EPI_ISL_1380192	Telangana	2020-10-14	20B	B.1.1.326	GR	Others	NA
EPI_ISL_1380193	Telangana	2020-10-14	20A	B.1.36.29	GH	Others	NA
EPI_ISL_1380194	Telangana	2020-10-15	20A	B.1.36.29	GH	Others	NA
EPI_ISL_1380196	Telangana	2020-10-15	20B	B.1.1.326	GR	Others	NA
EPI_ISL_1380197	Telangana	2020-10-15	20B	B.1.1.306	GR	Others	NA
EPI_ISL_1380198	Telangana	2020-10-15	20B	B.1.1.326	GR	Others	NA
EPI_ISL_1419490	West_Bengal	2020-09-30	20A	B.1.540	G	Others	NA
EPI_ISL_1419491	West_Bengal	2020-10-01	20A	B.1.540	G	Others	NA
EPI_ISL_1419492	West_Bengal	2020-10-01	20A	B.1.36	GH	Others	NA
EPI_ISL_1419493	West_Bengal	2020-10-01	20A	B.1.540	G	Others	NA
EPI_ISL_1419495	West_Bengal	2020-11-05	20A	B.1.540	G	Others	NA
EPI_ISL_1419496	West_Bengal	2021-02-12	20B	B.1.1.306	GR	Others	NA
EPI_ISL_1419511	West_Bengal	2021-02-23	20A	B.1.618	G	Others	NA
EPI_ISL_1419512	West_Bengal	2021-02-23	20A	B.1.36	GH	Others	NA
EPI_ISL_1419513	West_Bengal	2021-02-24	20I/501Y.V1	B.1.1.7	GRY	Alpha	VOC
EPI_ISL_1419519	West_Bengal	2021-02-04	20I/501Y.V1	B.1.1.7	GRY	Alpha	VOC
EPI_ISL_1419521	West_Bengal	2021-02-04	20B	B.1.1.345	GR	Others	NA
EPI_ISL_1419523	West_Bengal	2021-02-02	20B	B.1.1.216	GR	Others	NA
EPI_ISL_1419524	West_Bengal	2021-02-10	20B	B.1.1	GR	Others	NA
EPI_ISL_1419525	West_Bengal	2021-02-13	20A	B.1.36.29	GH	Others	NA
EPI_ISL_1419526	West_Bengal	2021-02-13	20B	B.1.1.216	GR	Others	NA
EPI_ISL_1419529	West_Bengal	2021-02-18	20A	B.1.36	GH	Others	NA
EPI_ISL_1419530	West_Bengal	2021-02-19	20B	B.1.1.216	GR	Others	NA
EPI_ISL_1419531	West_Bengal	2021-02-19	20I/501Y.V1	B.1.1.7	GRY	Alpha	VOC
EPI_ISL_1419546	West_Bengal	2021-02-19	20B	B.1.1.216	GR	Others	NA
EPI_ISL_1419561	West_Bengal	2021-02-22	20A	B.1.618	G	Others	NA
EPI_ISL_1419562	West_Bengal	2021-02-22	19B	A	S	Others	NA
EPI_ISL_1419563	West_Bengal	2021-02-22	20A	B.1	G	Others	NA
EPI_ISL_1419564	West_Bengal	2021-02-22	20A	B.1.618	G	Others	NA
EPI_ISL_1419566	West_Bengal	2021-02-22	20B	B.1.1.306	GR	Others	NA
EPI_ISL_1708502	Tamil_Nadu	2021-02-24	20I/501Y.V1	B.1.1.7	GR	Alpha	VOC
EPI_ISL_1708503	Tamil_Nadu	2021-02-24	20I/501Y.V1	B.1.1.7	GR	Alpha	VOC
EPI_ISL_444457	Gujarat	2020-04-26	20A	B.1	GH	Others	NA
EPI_ISL_444458	Gujarat	2020-04-26	20A	B.1.145	G	Others	NA
EPI_ISL_444459	Gujarat	2020-04-30	20A	B.1.36.8	GH	Others	NA
EPI_ISL_444464	Gujarat	2020-04-29	20A	B.1.36.8	GH	Others	NA
EPI_ISL_444465	Gujarat	2020-04-29	20A	B.1.36.8	GH	Others	NA
EPI_ISL_444466	Gujarat	2020-04-29	20A	B.1.36.8	GH	Others	NA
EPI_ISL_444468	Gujarat	2020-04-29	20A	B.1	G	Others	NA
EPI_ISL_444469	Gujarat	2020-04-29	20A	B.1.36.8	GH	Others	NA
EPI_ISL_444470	Gujarat	2020-04-29	20A	B.1	GH	Others	NA
EPI_ISL_444471	Gujarat	2020-04-29	20A	B.1	GH	Others	NA
EPI_ISL_444472	Gujarat	2020-04-29	20A	B.1.36.8	GH	Others	NA
EPI_ISL_444473	Gujarat	2020-04-29	20A	B.1	G	Others	NA
EPI_ISL_444474	Gujarat	2020-04-29	20A	B.1	GH	Others	NA
EPI_ISL_444475	Gujarat	2020-04-29	20A	B.1.145	G	Others	NA
EPI_ISL_444476	Gujarat	2020-04-29	20A	B.1.36.8	GH	Others	NA
EPI_ISL_444477	Gujarat	2020-04-29	20A	B.1	G	Others	NA
EPI_ISL_444478	Gujarat	2020-04-30	20A	B.1.145	G	Others	NA
EPI_ISL_508156	Uttarakhand	2020-06-01	20A	B.1.210	G	Others	NA
EPI_ISL_508157	Uttarakhand	2020-05-29	20B	B.1.1	GR	Others	NA
EPI_ISL_508158	Uttarakhand	2020-05-29	20A	B.1.210	G	Others	NA
EPI_ISL_508159	Uttarakhand	2020-05-22	20B	B.1.1	GR	Others	NA
EPI_ISL_508160	Uttarakhand	2020-06-06	20A	B.1.36	GH	Others	NA
EPI_ISL_508161	Uttarakhand	2020-06-06	20A	B.1.36	GH	Others	NA
EPI_ISL_508162	Uttarakhand	2020-05-24	20B	B.1.1.306	GR	Others	NA
EPI_ISL_508163	Uttarakhand	2020-05-27	20B	B.1.1.306	GR	Others	NA
EPI_ISL_508164	Uttarakhand	2020-05-27	20A	B.1.36	GH	Others	NA
EPI_ISL_508165	Uttarakhand	2020-05-23	20A	B.1.210	G	Others	NA
EPI_ISL_508166	Uttarakhand	2020-05-30	20A	B.1.210	G	Others	NA
EPI_ISL_508167	Uttarakhand	2020-05-30	20A	B.1.210	G	Others	NA
EPI_ISL_508168	Uttar_Pradesh	2020-06-02	20A	B.1.36	GH	Others	NA
EPI_ISL_508169	Uttarakhand	2020-05-21	20A	B.1.210	G	Others	NA
EPI_ISL_508300	Karnataka	2020-05-19	20B	B.1.1	GR	Others	NA
EPI_ISL_508301	Karnataka	2020-06-21	20A	B.1	G	Others	NA
EPI_ISL_508302	Karnataka	2020-06-15	20B	B.1.1	GR	Others	NA
EPI_ISL_508303	Karnataka	2020-06-06	20B	B.1.1.201	GR	Others	NA
EPI_ISL_508304	Karnataka	2020-06-17	20B	B.1.1.46	GR	Others	NA
EPI_ISL_508305	Karnataka	2020-05-26	20B	B.1.1	GR	Others	NA
EPI_ISL_508306	Karnataka	2020-06-20	20B	B.1.1.46	GR	Others	NA
EPI_ISL_508307	Karnataka	2020-06-17	20B	B.1.1	GR	Others	NA
EPI_ISL_508308	Karnataka	2020-06-17	20B	B.1.1.46	GR	Others	NA
EPI_ISL_508309	Karnataka	2020-05-19	20B	B.1.1	GR	Others	NA
EPI_ISL_511900	West_Bengal	2020-03-31	19A	B.6.6	O	Others	NA
EPI_ISL_511901	West_Bengal	2020-04-05	19B	A.9	S	Others	NA
EPI_ISL_511902	West_Bengal	2020-05-05	20A	B.1	G	Others	NA
EPI_ISL_511903	West_Bengal	2020-04-09	20A	B.1.206	G	Others	NA
EPI_ISL_511904	West_Bengal	2020-05-14	20A	B.1	G	Others	NA
EPI_ISL_511905	West_Bengal	2020-05-17	20A	B.1.540	G	Others	NA
EPI_ISL_511906	West_Bengal	2020-05-19	20A	B.1	G	Others	NA
EPI_ISL_511907	West_Bengal	2020-05-24	20A	B.1	G	Others	NA
EPI_ISL_511908	Uttarakhand	2020-05-27	20B	B.1.1.306	GR	Others	NA
EPI_ISL_511909	Uttarakhand	2020-05-28	20A	B.1.210	G	Others	NA
EPI_ISL_511910	Uttarakhand	2020-05-28	19A	B.1.210	O	Others	NA
EPI_ISL_511912	Uttarakhand	2020-05-28	20B	B.1.1.306	GR	Others	NA
EPI_ISL_511921	Uttarakhand	2020-06-02	20B	B.1.1	GR	Others	NA
EPI_ISL_511922	Uttarakhand	2020-06-09	20A	B.1.36	GH	Others	NA
EPI_ISL_511924	Maharashtra	2020-05-15	20B	B.1.1.101	GR	Others	NA
EPI_ISL_511926	Maharashtra	2020-06-06	20A	B.1.36	GH	Others	NA
EPI_ISL_511927	Maharashtra	2020-06-06	20A	B.1.36	GH	Others	NA
EPI_ISL_511928	Haryana	2020-06-10	20B	B.1.1	GR	Others	NA
EPI_ISL_511929	Maharashtra	2020-06-17	20B	B.1.1	GR	Others	NA
EPI_ISL_511930	Maharashtra	2020-06-17	20B	B.1.1.306	GR	Others	NA
EPI_ISL_511931	Maharashtra	2020-06-17	20B	B.1.1.306	GR	Others	NA
EPI_ISL_511932	Maharashtra	2020-06-20	20B	B.1.1.306	GR	Others	NA
EPI_ISL_511933	Maharashtra	2020-06-20	20B	B.1.1.306	GR	Others	NA
EPI_ISL_511934	Maharashtra	2020-06-18	20B	B.1.1.306	GR	Others	NA
EPI_ISL_511935	Maharashtra	2020-06-16	20B	B.1.1.306	GR	Others	NA
EPI_ISL_511944	Haryana	2020-06-17	20A	B.1.36	GH	Others	NA
EPI_ISL_541710	Maharashtra	2020-08-11	20B	B.1.1.306	GR	Others	NA
EPI_ISL_541713	Maharashtra	2020-08-20	20B	B.1.1.306	GR	Others	NA
EPI_ISL_541714	Maharashtra	2020-08-21	20B	B.1.1.306	GR	Others	NA
EPI_ISL_541715	Maharashtra	2020-08-23	20B	B.1.1.306	GR	Others	NA
EPI_ISL_541716	Maharashtra	2020-08-24	20B	B.1.1.306	GR	Others	NA
EPI_ISL_541720	Maharashtra	2020-08-31	20B	B.1.1.306	GR	Others	NA
EPI_ISL_541721	Maharashtra	2020-08-31	20B	B.1.1.306	GR	Others	NA
EPI_ISL_541724	Maharashtra	2020-09-03	20B	B.1.1.306	GR	Others	NA
EPI_ISL_541725	Maharashtra	2020-06-04	20B	B.1.1.306	GR	Others	NA
EPI_ISL_541726	Maharashtra	2020-06-10	20B	B.1.1.306	GR	Others	NA
EPI_ISL_541728	Maharashtra	2020-06-10	20B	B.1.1.306	GR	Others	NA
EPI_ISL_541729	Maharashtra	2020-06-11	20B	B.1.1.306	GR	Others	NA
EPI_ISL_541731	Maharashtra	2020-06-12	20B	B.1.1.306	GR	Others	NA
EPI_ISL_541734	Maharashtra	2020-06-20	20B	B.1.1.306	GR	Others	NA
EPI_ISL_541735	Maharashtra	2020-06-20	20B	B.1.1	GR	Others	NA
EPI_ISL_541736	Maharashtra	2020-06-20	20B	B.1.1.306	GR	Others	NA
EPI_ISL_541740	Maharashtra	2020-07-03	20B	B.1.1.306	GR	Others	NA
EPI_ISL_541741	Maharashtra	2020-06-23	20B	B.1.1.306	GR	Others	NA
EPI_ISL_541742	Maharashtra	2020-06-23	20B	B.1.1.306	GR	Others	NA
EPI_ISL_541744	Maharashtra	2020-06-24	20B	B.1.1.306	GR	Others	NA
EPI_ISL_541746	Maharashtra	2020-06-25	20B	B.1.1.306	GR	Others	NA
EPI_ISL_541747	Maharashtra	2020-06-25	20B	B.1.1.306	GR	Others	NA
EPI_ISL_541751	Maharashtra	2020-07-06	20A	B.1	G	Others	NA
EPI_ISL_577700	Maharashtra	2020-09-29	20A	B.1.210	G	Others	NA
EPI_ISL_577701	Maharashtra	2020-09-29	20B	B.1.1.306	GR	Others	NA
EPI_ISL_577704	Maharashtra	2020-09-11	20B	B.1.1.306	GR	Others	NA
EPI_ISL_577705	Maharashtra	2020-09-14	20B	B.1.1.306	GR	Others	NA
EPI_ISL_577707	Maharashtra	2020-08-14	20B	B.1.1.306	GR	Others	NA
EPI_ISL_577709	Maharashtra	2020-09-28	20B	B.1.1.306	GR	Others	NA
EPI_ISL_577710	Maharashtra	2020-09-28	20B	B.1.1.306	GR	Others	NA
EPI_ISL_582241	Maharashtra	2020-09-28	20B	B.1.1.306	GR	Others	NA
EPI_ISL_862051	Uttar_Pradesh	2021-01-04	20B	B.1.1.216	GR	Others	NA
EPI_ISL_910170	Telangana	2020-09-11	20B	B.1.1.326	GR	Others	NA
EPI_ISL_910171	Telangana	2020-09-11	20B	B.1.1.306	GR	Others	NA
EPI_ISL_910172	Telangana	2020-09-11	20B	B.1.1.306	GR	Others	NA
EPI_ISL_910173	Telangana	2020-09-11	20A	B.1.36.8	GH	Others	NA
EPI_ISL_910175	Telangana	2020-09-11	20B	B.1.1.306	GR	Others	NA
EPI_ISL_910176	Telangana	2020-09-11	20B	B.1.1.326	GR	Others	NA
EPI_ISL_910177	Telangana	2020-09-11	20B	B.1.1.306	GR	Others	NA
EPI_ISL_910178	Telangana	2020-09-12	20B	B.1.1	GR	Others	NA
EPI_ISL_910179	Telangana	2020-09-12	20B	B.1.1.326	GR	Others	NA
EPI_ISL_910180	Telangana	2020-09-12	20B	B.1.1.306	GR	Others	NA
EPI_ISL_910181	Telangana	2020-09-12	20B	B.1.1.326	GR	Others	NA
EPI_ISL_910182	Telangana	2020-09-12	20A	B.1.36.8	GH	Others	NA
EPI_ISL_910183	Telangana	2020-09-13	20B	B.1.1.306	GR	Others	NA
EPI_ISL_910184	Telangana	2020-09-13	20B	B.1.1.326	GR	Others	NA
EPI_ISL_910185	Telangana	2020-09-13	20B	B.1.1.326	GR	Others	NA
EPI_ISL_910186	Telangana	2020-09-13	20B	B.1.1.326	GR	Others	NA
EPI_ISL_910187	Telangana	2020-09-13	20A	B.1.36.29	GH	Others	NA
EPI_ISL_910188	Telangana	2020-09-13	20B	B.1.1.216	GR	Others	NA
EPI_ISL_910189	Telangana	2020-09-13	20B	B.1.1.306	GR	Others	NA
EPI_ISL_910190	Telangana	2020-09-13	20B	B.1.1.326	GR	Others	NA
EPI_ISL_910191	Telangana	2020-09-14	20B	B.1.1.326	GR	Others	NA
EPI_ISL_910192	Telangana	2020-09-14	20B	B.1.1.306	GR	Others	NA
EPI_ISL_910193	Telangana	2020-09-14	20B	B.1.1.306	GR	Others	NA
EPI_ISL_910194	Telangana	2020-09-14	20B	B.1.1.306	GR	Others	NA
EPI_ISL_910195	Telangana	2020-09-14	20A	B.1.36.29	GH	Others	NA
EPI_ISL_910196	Telangana	2020-09-14	20B	B.1.1.326	GR	Others	NA
EPI_ISL_910197	Telangana	2020-09-15	20A	B.1.36.29	GH	Others	NA
EPI_ISL_910198	Telangana	2020-09-15	20B	B.1.1.326	GR	Others	NA
EPI_ISL_1072020	Chandigarh	2020-08-25	20A	B.1.36	GH	Others	NA
EPI_ISL_1081834	Maharashtra	2020-05-21	20A	B.1.210	G	Others	NA
EPI_ISL_1081835	Maharashtra	2020-06-10	20A	B.1.210	G	Others	NA
EPI_ISL_1103556	Andhra_Pradesh	2020-07-25	20A	B.1.36.29	GH	Others	NA
EPI_ISL_1357700	West_Bengal	2021-03-12	20A	B.1.617.1	G	Kappa	VOI
EPI_ISL_1357702	West_Bengal	2021-03-13	20A	B.1.617.1	G	Kappa	VOI
EPI_ISL_1357705	West_Bengal	2021-03-05	20A	B.1.617.1	G	Kappa	VOI
EPI_ISL_1357706	West_Bengal	2021-03-09	20A	B.1.617.1	G	Kappa	VOI
EPI_ISL_1380100	Telangana	2020-10-03	20A	B.1.36.29	GH	Others	NA
EPI_ISL_1380101	Telangana	2020-10-03	20B	B.1.1.306	GR	Others	NA
EPI_ISL_1380102	Telangana	2020-10-03	20B	B.1.1.326	GR	Others	NA
EPI_ISL_1380104	Telangana	2020-10-03	20A	B.1.540	G	Others	NA
EPI_ISL_1380105	Telangana	2020-10-04	20B	B.1.1	GR	Others	NA
EPI_ISL_1380106	Telangana	2020-10-04	20A	B.1.36.29	GH	Others	NA
EPI_ISL_1380107	Telangana	2020-10-04	20B	B.1.1.306	GR	Others	NA
EPI_ISL_1380108	Telangana	2020-10-04	20B	B.1.1.306	GR	Others	NA
EPI_ISL_1380109	Telangana	2020-10-04	20B	B.1.1.326	GR	Others	NA
EPI_ISL_1380110	Telangana	2020-10-04	20B	B.1.1.326	GR	Others	NA
EPI_ISL_1380111	Telangana	2020-10-04	20B	B.1.1.306	GR	Others	NA
EPI_ISL_1380112	Telangana	2020-10-04	20B	B.1.1.306	GR	Others	NA
EPI_ISL_1380113	Telangana	2020-10-04	20B	B.1.1.326	GR	Others	NA
EPI_ISL_1380115	Telangana	2020-10-06	20B	B.1.1.306	GR	Others	NA
EPI_ISL_1380116	Telangana	2020-10-06	20B	B.1.1	GR	Others	NA
EPI_ISL_1380118	Telangana	2020-10-06	20B	B.1.1.326	GR	Others	NA
EPI_ISL_1380120	Telangana	2020-10-06	20B	B.1.1.326	GR	Others	NA
EPI_ISL_1380121	Telangana	2020-10-06	20B	B.1.1	GR	Others	NA
EPI_ISL_1380122	Telangana	2020-10-06	20B	B.1.1.326	GR	Others	NA
EPI_ISL_1380123	Telangana	2020-10-06	20B	B.1.1	GR	Others	NA
EPI_ISL_1380124	Telangana	2020-10-06	20B	B.1.1	GR	Others	NA
EPI_ISL_1380125	Telangana	2020-10-06	20A	B.1.36.29	GH	Others	NA
EPI_ISL_1380126	Telangana	2020-10-06	20B	B.1.1.326	GR	Others	NA
EPI_ISL_1380127	Telangana	2020-10-06	20A	B.1.36.29	GH	Others	NA
EPI_ISL_1380128	Telangana	2020-10-06	20B	B.1.1.326	GR	Others	NA
EPI_ISL_1380129	Telangana	2020-10-06	20A	B.1.36	GH	Others	NA
EPI_ISL_1380130	Telangana	2020-10-07	20A	B.1.195	G	Others	NA
EPI_ISL_1380131	Telangana	2020-10-07	20A	B.1.36.29	GH	Others	NA
EPI_ISL_1380132	Telangana	2020-10-07	20A	B.1.36.29	GH	Others	NA
EPI_ISL_1380134	Telangana	2020-10-07	20A	B.1.36.29	GH	Others	NA
EPI_ISL_1380135	Telangana	2020-10-07	20A	B.1.36.29	GH	Others	NA
EPI_ISL_1380136	Telangana	2020-10-07	20B	B.1.1.326	GR	Others	NA
EPI_ISL_1380137	Telangana	2020-10-07	20A	B.1.195	G	Others	NA
EPI_ISL_1380138	Telangana	2020-10-07	20A	B.1.36.29	GH	Others	NA
EPI_ISL_1380139	Telangana	2020-10-07	20B	B.1.1.46	GR	Others	NA
EPI_ISL_1380140	Telangana	2020-10-07	20B	B.1.1.46	GR	Others	NA
EPI_ISL_1380141	Telangana	2020-10-07	20A	B.1.36.29	GH	Others	NA
EPI_ISL_1380142	Telangana	2020-10-08	20B	B.1.1.326	GR	Others	NA
EPI_ISL_1380143	Telangana	2020-10-08	20A	B.1	GH	Others	NA
EPI_ISL_1380144	Telangana	2020-10-08	20B	B.1.1	GR	Others	NA
EPI_ISL_1380145	Telangana	2020-10-08	20A	B.1.36.29	GH	Others	NA
EPI_ISL_1380146	Telangana	2020-10-08	20A	B.1.36.29	GH	Others	NA
EPI_ISL_1380147	Telangana	2020-10-08	20A	B.1.36.29	GH	Others	NA
EPI_ISL_1380148	Telangana	2020-10-08	20B	B.1.1.306	GR	Others	NA
EPI_ISL_1380149	Telangana	2020-10-08	20A	B.1.36.29	GH	Others	NA
EPI_ISL_1380150	Telangana	2020-10-08	20B	B.1.1	GR	Others	NA
EPI_ISL_1380151	Telangana	2020-10-08	20B	B.1.1.306	GR	Others	NA
EPI_ISL_1380152	Telangana	2020-10-08	20B	B.1.1.326	GR	Others	NA
EPI_ISL_1380153	Telangana	2020-10-09	20A	B.1.36.29	GH	Others	NA
EPI_ISL_1380154	Telangana	2020-10-09	20B	B.1.1.306	GR	Others	NA
EPI_ISL_1380155	Telangana	2020-10-09	20B	B.1.1.306	GR	Others	NA
EPI_ISL_1380156	Telangana	2020-10-09	20B	B.1.1.306	GR	Others	NA
EPI_ISL_1380158	Telangana	2020-10-09	20B	B.1.1.326	GR	Others	NA
EPI_ISL_1380159	Telangana	2020-10-09	20A	B.1.36.29	GH	Others	NA
EPI_ISL_1380160	Telangana	2020-10-09	20B	B.1.1	GR	Others	NA
EPI_ISL_1380161	Telangana	2020-10-09	20A	B.1.36	GH	Others	NA
EPI_ISL_1380162	Telangana	2020-10-09	20B	AE.2	GR	Others	NA
EPI_ISL_1380163	Telangana	2020-10-09	20B	B.1.1.326	GR	Others	NA
EPI_ISL_1380164	Telangana	2020-10-11	20B	B.1.1.326	GR	Others	NA
EPI_ISL_1380165	Telangana	2020-10-11	20B	B.1.1.306	GR	Others	NA
EPI_ISL_1380166	Telangana	2020-10-11	20A	B.1.36.29	GH	Others	NA
EPI_ISL_1380167	Telangana	2020-10-11	20B	B.1.1.326	GR	Others	NA
EPI_ISL_1380168	Telangana	2020-10-11	20B	B.1.1.306	GR	Others	NA
EPI_ISL_1380171	Telangana	2020-10-11	20A	B.1.36.29	GH	Others	NA
EPI_ISL_1380172	Telangana	2020-10-11	20B	B.1.1.306	GR	Others	NA
EPI_ISL_1380173	Telangana	2020-10-11	20B	B.1.1.306	GR	Others	NA
EPI_ISL_1380174	Telangana	2020-10-11	20B	B.1.1.326	GR	Others	NA
EPI_ISL_1380175	Telangana	2020-10-11	20A	B.1.36.29	GH	Others	NA
EPI_ISL_1380176	Telangana	2020-10-11	20A	B.1.36	GH	Others	NA
EPI_ISL_1380179	Telangana	2020-10-13	20B	B.1.1.326	GR	Others	NA
EPI_ISL_1419503	West_Bengal	2020-08-31	20A	B.1	G	Others	NA
EPI_ISL_1419504	West_Bengal	2020-08-31	20B	B.1.1.25	GR	Others	NA
EPI_ISL_1419505	West_Bengal	2020-08-31	20A	B.1	G	Others	NA
EPI_ISL_1419506	West_Bengal	2020-09-02	20A	B.1	G	Others	NA
EPI_ISL_1419507	West_Bengal	2020-09-03	20A	B.1	G	Others	NA
EPI_ISL_1419509	West_Bengal	2020-09-03	20A	B.1	G	Others	NA
EPI_ISL_1419551	West_Bengal	2021-02-20	20A	B.1.618	G	Others	NA
EPI_ISL_1419555	West_Bengal	2021-02-20	20A	B.1.618	G	Others	NA
EPI_ISL_1419556	West_Bengal	2021-02-20	20A	B.1.618	G	Others	NA
EPI_ISL_1419557	West_Bengal	2021-02-21	20A	B.1.618	G	Others	NA
EPI_ISL_1419558	West_Bengal	2021-02-21	20B	B.1.1.216	GR	Others	NA
EPI_ISL_1419571	West_Bengal	2021-02-23	20A	B.1.618	G	Others	NA
EPI_ISL_1419572	West_Bengal	2021-02-24	20A	B.1.618	G	Others	NA
EPI_ISL_1419573	West_Bengal	2021-02-24	20A	B.1.618	G	Others	NA
EPI_ISL_1419575	West_Bengal	2021-02-24	20A	B.1.618	G	Others	NA
EPI_ISL_1419577	West_Bengal	2021-02-24	20A	B.1.618	G	Others	NA
EPI_ISL_1419578	West_Bengal	2021-02-24	20I/501Y.V1	B.1.1.7	GRY	Alpha	VOC
EPI_ISL_1419586	West_Bengal	2020-10-21	20A	B.1	G	Others	NA
EPI_ISL_1547802	Maharashtra	2021-03-10	20A	B.1.617.1	G	Kappa	VOI
EPI_ISL_1547803	Maharashtra	2021-03-11	20A	B.1.617.1	G	Kappa	VOI
EPI_ISL_1547804	Maharashtra	2021-03-12	20A	B.1.36.29	GH	Others	NA
EPI_ISL_1547805	Maharashtra	2021-03-13	20A	B.1.617.1	G	Kappa	VOI
EPI_ISL_1708470	Tamil_Nadu	2021-02-10	20I/501Y.V1	B.1.1.7	GR	Alpha	VOC
EPI_ISL_1708473	Tamil_Nadu	2021-02-10	20E_EU1	B.1.177	GV	Others	NA
EPI_ISL_1708474	Karnataka	2021-02-11	20B	B.1.1	GR	Others	NA
EPI_ISL_1708475	Karnataka	2021-02-11	20B	B.1.1.354	GR	Others	NA
EPI_ISL_1708476	Karnataka	2021-02-11	20B	B.1.1.354	GR	Others	NA
EPI_ISL_1708477	Karnataka	2021-02-11	20B	B.1.560	G	Others	NA
EPI_ISL_1708478	Karnataka	2021-02-11	20B	B.1.560	G	Others	NA
EPI_ISL_1708479	Karnataka	2021-02-11	20B	B.1.560	G	Others	NA
EPI_ISL_1708481	Karnataka	2021-02-11	20B	B.1.1.354	GR	Others	NA
EPI_ISL_1708482	Karnataka	2021-02-11	20B	B.1.1.354	GR	Others	NA
EPI_ISL_1708483	Karnataka	2021-02-11	20A	B.1.560	G	Others	NA
EPI_ISL_1708484	Karnataka	2021-02-11	20B	B.1.560	G	Others	NA
EPI_ISL_1708485	Karnataka	2021-02-11	20B	B.1.1	GR	Others	NA
EPI_ISL_1708486	Karnataka	2021-02-11	20A	B.1.560	G	Others	NA
EPI_ISL_1708487	Karnataka	2021-02-11	20B	B.1.560	G	Others	NA
EPI_ISL_1708488	Karnataka	2021-02-11	20B	B.1.560	G	Others	NA
EPI_ISL_1708489	Karnataka	2021-02-11	20B	B.1.1	GR	Others	NA
EPI_ISL_1708490	Karnataka	2021-02-11	20B	B.1.1	GR	Others	NA
EPI_ISL_1708491	Karnataka	2021-02-11	20B	B.1.1	GR	Others	NA
EPI_ISL_1708492	Karnataka	2021-02-11	20B	B.1.560	G	Others	NA
EPI_ISL_1708493	Karnataka	2021-02-11	20A	B.1.560	G	Others	NA
EPI_ISL_1708494	Karnataka	2021-02-11	20B	B.1.1	GR	Others	NA
EPI_ISL_1708495	Karnataka	2021-02-11	20A	B.1.560	G	Others	NA
EPI_ISL_1708496	Karnataka	2021-02-11	20A	B.1.149	G	Others	NA
EPI_ISL_1708497	Karnataka	2021-02-11	20B	B.1.1	GR	Others	NA
EPI_ISL_1708498	Tamil_Nadu	2021-02-24	20B	B.1.1	GR	Others	NA
EPI_ISL_1708501	Tamil_Nadu	2021-02-24	20I/501Y.V1	B.1.1.7	GR	Alpha	VOC
EPI_ISL_437440	Gujarat	2020-04-26	20A	B.1	GH	Others	NA
EPI_ISL_437441	Gujarat	2020-04-26	19B	A	S	Others	NA
EPI_ISL_437444	Gujarat	2020-04-26	19A	B.6	O	Others	NA
EPI_ISL_437445	Gujarat	2020-04-26	20A	B.1.36.8	GH	Others	NA
EPI_ISL_437446	Gujarat	2020-04-26	20A	B.1.36.8	GH	Others	NA
EPI_ISL_437447	Gujarat	2020-04-26	20A	B.1	G	Others	NA
EPI_ISL_437448	Gujarat	2020-04-26	20A	B.1	G	Others	NA
EPI_ISL_437449	Gujarat	2020-04-26	20A	B.1	GH	Others	NA
EPI_ISL_437450	Gujarat	2020-04-26	20A	B.1	G	Others	NA
EPI_ISL_437451	Gujarat	2020-04-26	20A	B.1	G	Others	NA
EPI_ISL_437452	Gujarat	2020-04-26	20A	B.1.36.8	GH	Others	NA
EPI_ISL_437453	Gujarat	2020-04-26	19A	B.6	L	Others	NA
EPI_ISL_437454	Gujarat	2020-04-26	19A	B.6	O	Others	NA
EPI_ISL_455309	Odisha	2020-04-04	20A	B.1	GH	Others	NA
EPI_ISL_455311	Odisha	2020-05-07	19B	B	O	Others	NA
EPI_ISL_486400	Karnataka	2020-05-03	19A	B.4.7	O	Others	NA
EPI_ISL_486408	Karnataka	2020-05-10	19A	B.6	O	Others	NA
EPI_ISL_486409	Karnataka	2020-05-10	19A	B.6	O	Others	NA
EPI_ISL_508170	Uttarakhand	2020-05-22	20A	B.1	GH	Others	NA
EPI_ISL_508171	Uttarakhand	2020-05-21	20B	B.1.1.101	GR	Others	NA
EPI_ISL_508172	Uttarakhand	2020-05-30	20A	B.1.36	GH	Others	NA
EPI_ISL_508173	Uttarakhand	2020-05-27	20B	B.1.1.306	GR	Others	NA
EPI_ISL_508174	Uttarakhand	2020-06-01	20B	B.1.1.306	GR	Others	NA
EPI_ISL_508175	Uttarakhand	2020-06-29	20A	B.1.36	GH	Others	NA
EPI_ISL_508176	Uttarakhand	2020-05-26	20A	B.1.36	GH	Others	NA
EPI_ISL_508177	Uttarakhand	2020-06-01	20A	B.1.36	GH	Others	NA
EPI_ISL_508178	Uttarakhand	2020-05-29	20B	B.1.1	GR	Others	NA
EPI_ISL_508179	Uttarakhand	2020-05-29	20B	B.1.1	GR	Others	NA
EPI_ISL_508180	Uttarakhand	2020-06-04	20A	B.1.36	GH	Others	NA
EPI_ISL_508181	Uttarakhand	2020-06-02	19B	A	S	Others	NA
EPI_ISL_508182	Uttarakhand	2020-06-08	20A	B.1.36	GH	Others	NA
EPI_ISL_508183	Uttarakhand	2020-05-28	20A	B.1.210	G	Others	NA
EPI_ISL_508184	Uttarakhand	2020-06-01	20B	B.1.1	GR	Others	NA
EPI_ISL_508185	Uttarakhand	2020-05-28	20B	B.1.1.306	GR	Others	NA
EPI_ISL_508186	Uttarakhand	2020-05-28	20B	B.1.1.306	GR	Others	NA
EPI_ISL_508187	Uttarakhand	2020-05-28	20B	B.1.1.306	GR	Others	NA
EPI_ISL_508188	Uttarakhand	2020-05-28	20B	B.1.1.101	GR	Others	NA
EPI_ISL_508189	Uttarakhand	2020-05-23	19A	B.6	O	Others	NA
EPI_ISL_508190	Uttarakhand	2020-05-23	19A	B.6	O	Others	NA
EPI_ISL_508191	Uttarakhand	2020-06-01	20B	B.1.1	GR	Others	NA
EPI_ISL_508193	Uttarakhand	2020-06-04	20B	B.1.1.306	GR	Others	NA
EPI_ISL_508194	Uttarakhand	2020-05-21	20A	B.1.210	G	Others	NA
EPI_ISL_508195	Uttarakhand	2020-06-03	20A	B.1.36	GH	Others	NA
EPI_ISL_508196	Uttarakhand	2020-05-22	20A	B.1.36	GH	Others	NA
EPI_ISL_508197	Uttarakhand	2020-06-09	20B	B.1.1	GR	Others	NA
EPI_ISL_508198	Uttarakhand	2020-06-09	20B	B.1.1	GR	Others	NA
EPI_ISL_508199	Uttarakhand	2020-06-08	20B	B.1.1	GR	Others	NA
EPI_ISL_541682	Maharashtra	2020-04-16	20B	B.1	GR	Others	NA
EPI_ISL_541685	Maharashtra	2020-07-14	20B	B.1.1.306	GR	Others	NA
EPI_ISL_541687	Maharashtra	2020-07-15	20B	B.1.1.306	GR	Others	NA
EPI_ISL_541689	Maharashtra	2020-07-17	20B	B.1.1.306	GR	Others	NA
EPI_ISL_541690	Maharashtra	2020-07-18	20B	B.1.1.306	GR	Others	NA
EPI_ISL_541691	Maharashtra	2020-07-18	20B	B.1.1.306	GR	Others	NA
EPI_ISL_541693	Maharashtra	2020-07-20	20B	B.1.1.306	GR	Others	NA
EPI_ISL_541695	Maharashtra	2020-07-26	20B	B.1.1.306	GR	Others	NA
[truncated: 7,539 more rows]
