# Supplementary material for: Circulation and Evolution of SARS-CoV-2 in India: Let the Data Speak
Source: Viruses. 2021 Nov 8;13(11):2238. doi: 10.3390/v13112238 (PMC8619538; doi:10.3390/v13112238)
Supplement: Supplementary file 1 [file viruses-13-02238-s001.zip › Supplementary file 8.xlsx]

## Sheet: Spike Selection Presseure
Codon under positive selection	Amino Acid in Wuhan isolate	Substitutions	No of States in which codon is sampled	States / UTs	VoC / VoI with positively selected codon in Indian samples
681	P	H, L, R	19	Andhra_Pradesh, Bihar, Chandigarh, Chattisgarh, Gujarat, Himachal_Pradesh, J&K, Karnataka, Kerala, Madhya_Pradesh, Maharashtra, Odisha, Puducherry, Rajasthan, Sikkim, Tamil_Nadu, Telangana, Uttarakhand, West_Bengal	Alpha, Delta, Kappa, Others
484	E	D, K, Q	13	Andhra_Pradesh, Bihar, Chattisgarh, Delhi, Gujarat, Kerala, Maharashtra, Odisha, Puducherry, Sikkim, Tamil_Nadu, Telangana, West_Bengal	Alpha, Beta, Delta, Eta, Gamma, Kappa, Others
142	G	D, S, -	12	Andhra_Pradesh, Bihar, Chattisgarh, Delhi, Gujarat, Karnataka, Madhya_Pradesh, Maharashtra, Odisha, Puducherry, Sikkim, Telangana	Alpha, Delta, Kappa, Others
95	T	I,S	11	Andhra_Pradesh, Chattisgarh, Delhi, Gujarat, Karnataka, Madhya_Pradesh, Maharashtra, Odisha, Puducherry, Telangana, West_Bengal	Alpha, Delta, Kappa, Others
138	D	H, Y	9	Andhra_Pradesh, Chattisgarh, Gujarat, Karnataka, Odisha, Puducherry, Tamil_Nadu, Telangana, West_Bengal	Alpha, Delta, Gamma, Others
677	Q	H, R	8	Andhra_Pradesh, Bihar, Chattisgarh, Gujarat, Puducherry, Rajasthan, Telangana, West_Bengal	Delta, Eta, Kappa, Others
440	N	F, H, K, N, R, S, Y	7	Andhra_Pradesh, Chattisgarh, Gujarat, Karnataka, Maharashtra, Telangana, West_Bengal	Others
154	E	K	6	Andhra_Pradesh, Chattisgarh, Gujarat, Madhya_Pradesh, Maharashtra, Telangana	Kappa, Others
5	L	F	5	Delhi, Gujarat, Maharashtra, Telangana, West_Bengal	Alpha, Delta, Kappa, Others
501	N	S, T, Y	5	Chattisgarh, Delhi, Gujarat, Telangana, West_Bengal	Alpha, Beta, Delta, Gamma, Others
1101	H	D, Y	5	Andhra_Pradesh, Chattisgarh, Gujarat, Karnataka, Odisha	Alpha, Kappa, Others
570	A	D, S, V	4	Bihar, Chattisgarh, Gujarat, Maharashtra	Alpha, Kappa, Others
1071	Q	E, H, L	4	Chattisgarh, Maharashtra, Odisha, Telangana	Delta, Kappa, Others
769	G	A, R, V	4	Gujarat, Himachal_Pradesh, Rajasthan, Telangana	Kappa, Others
1118	D	H, Y	4	Chattisgarh, Delhi, Gujarat, Karnataka	Alpha, Others
675	Q	H, R	4	Bihar, Chattisgarh, Rajasthan, West_Bengal	Others
478	T	I, K	4	Delhi, Odisha, Puducherry, Tamil_Nadu	Alpha, Delta, Others
222	A	S, V	3	Gujarat, Maharashtra, Telangana	Delta, Kappa, Others
950	D	H, N	3	Bihar, Gujarat, Maharashtra	Delta, Others
75	G	A, C, D, R, S, V	3	Maharashtra, Rajasthan, Telangana	Alpha, Delta, Others
943	S	P, T	3	Madhya_Pradesh, Maharashtra, West_Bengal	Alpha, Delta, Kappa, Others
22	T	A, I, N, S	3	Karnataka, Maharashtra, Rajasthan	Kappa, Others
1078	A	S, T	2	Gujarat, Maharashtra	Delta, Others
441	L	F, I, M, R, V, Y	2	Chattisgarh, Maharashtra	Others
443	S	A, C, F, L, Y	2	Maharashtra, Odisha	Others
259	T	A, L, R, S, W			Delta, Others
444	K	F, I, L, M, N, R, Y			Kappa, Others
27	A	K, S, V	2	Maharashtra, Uttarakhand	Delta, Kappa, Others
80	D	A, G, H, N, Y	2	Gujarat, Telangana	Alpha, Beta, Delta, Others
215	D	G, H, Y			Beta, Others
54	L	F	2	Gujarat, Odisha	Kappa, Others
716	T	I	2	Odisha, Telangana	Alpha, Others
452	L	M, Q, R	2	Odisha, West_Bengal	Delta, Kappa, Others
20	T	A, I, N	2	Rajasthan, West_Bengal	Gamma, Others
18	L	F	2	Andhra_Pradesh, West_Bengal	Beta, Gamma, Kappa, Others
442	D	E, F, N, V, Y	2	Chattisgarh, Odisha	Others
70	V	A, F, I, L	2	Andhra_Pradesh, Tamil_Nadu	Alpha, Kappa, Others
214	R	H, L	1	Maharashtra	Others
256	S	D, F, L, P, T			Others
845	A	S, V			Kappa, Others
879	A	S, T, V			Others
1077	T	G, I			Others
1260	D	Y, N			Eta, Others
23	Q	R	1	Gujarat	Delta, Kappa, Others
477	S	I, N			Kappa, Others
495	Y	M			Delta
583	E	D, Q			Alpha, Delta, Kappa, Others
613	Q	H			Delta, Kappa, Others
688	A	S, V			Alpha, Others
812	P	L, R, S			Alpha, Kappa, Others
1083	H	N, Q			Delta, Others
1163	D	H, N, Y			Others
1176	V	F			Delta, Gamma, Kappa, Others
96	E	A, D, G, Q	1	Telangana	Others
213	V	A, G, L			Others
771	A	S			Alpha, Others
859	T	I, N			Kappa, Others
1020	A	S, T, V			Delta, Others
1219	G	C, V			Alpha, Delta, Kappa, Others
13	S	G,I	1	West_Bengal	Alpha, Others
26	P	H, L, S			Alpha, Delta, Gamma, Others
49	H	Y			Others
176	L	F			Alpha, Others
261	G	A, C, D, R, S, V			Others
1117	T	I			Delta, Others
1228	V	I, L			Alpha, Delta, Kappa, Others
87	N	K	1	Chattisgarh	Others
164	N	S, Y			Kappa, Others
382	V	L			Kappa, Others
657	N	S			Others
678	T	A, I			Alpha, Others
834	I	F, N, S			Others
1153	D	G, Y			Kappa, Others
19	T	I, R	1	Odisha	Delta, Kappa, Others
152	W	G, K, L, R			Delta, Kappa, Others
255	S	C, F, L			Delta, Kappa, Others
257	G	C, D, S, V			Others
262	A	P, S			Alpha, Others
494	S	L, P			Kappa, Others
627	D	A, P	1	Karnataka	Others
98	S	F	1	Delhi	Alpha, Others
148	N	H, K, S, Y			Alpha, Others
1124	G	C, V	1	Rajasthan	Kappa, Others
1191	K	N	1	Himachal_Pradesh	Alpha, Others
183	Q	H, R	1	Chandigarh	Others
69	H	S, Y, -	1	Bihar	Alpha, Delta, Eta, Kappa, Others
