# Supplementary material for: Circulation and Evolution of SARS-CoV-2 in India: Let the Data Speak
Source: Viruses. 2021 Nov 8;13(11):2238. doi: 10.3390/v13112238 (PMC8619538; doi:10.3390/v13112238)
Supplement: Supplementary file 1 [file viruses-13-02238-s001.zip › Supplementary file 9.xlsx]

## Sheet: sites_under_selection_analyses
Codon under selection	Amino acid in Wuhan isolate	Substitution sampled in Indian isolates	T cell epitope mapping (MHC class: IEDB Epitope ID)	B cell epitope mapping (L (linear)/ C (conformational): IEDB Epitope ID)	Corresponding spike domain	Accessible surface area (ASA > 25 % : Buried, ASA < 25 % : Exposed
452	L	Q, R	MHC1: 1313269	14-C: 1347685, 1391788, 1311244, 1346815, 1310989, 1075135, 1329039, 1392552, 1335956, 1347689, 1335943, 1314090, 1346808, 1335961, 1346810	S1_RBD	Exposed
5	L	F			Signal peptide	#N/A
13	S	G,I		L: 1488606	S1_NTD	#N/A
18	L	F		L: 1488606	S1_NTD	Exposed
19	T	R		L: 1488606	S1_NTD	Exposed
20	T	A, I, N		L: 1488606	S1_NTD	Exposed
22	T	A, I, N, S			S1_NTD	Exposed
23	Q	R			S1_NTD	Exposed
26	P	H, L, S	MHC1: 1074980		S1_NTD	Exposed
27	A	K, S, V	MHC1: 1074980		S1_NTD	Exposed
49	H	Y	2-MHC2: 1310935, 1310827	L: 1313684	S1_NTD	Exposed
54	L	F	MHC1: 1075065	L: 1313684	S1_NTD	Buried
69	H	S	MHC2: 1310610		S1_NTD	Exposed
70	V	F, I	MHC2: 1310610		S1_NTD	#N/A
75	G	A, D, R, S, V			S1_NTD	#N/A
80	D	A, Y	MHC1: 1087399		S1_NTD	Buried
87	N	K	MHC1: 1087399		S1_NTD	Exposed
95	T	I,S	MHC1: 1075071		S1_NTD	Buried
96	E	D, G, Q	MHC1: 1075071		S1_NTD	Buried
98	S	F	MHC1: 1075071		S1_NTD	Buried
138	D	H, Y	MHC1: 1074884/ MHC2: 1310306		S1_NTD	Buried
142	G	D, S, -	MHC1: 1074884/ MHC2: 1310306	3-C: 1346803, 1347910, 1346805	S1_NTD	Buried
148	N	K, S			S1_NTD	Exposed
152	W	K		L: 1310830	S1_NTD	Exposed
154	E	K		L: 1310830 /3-C	S1_NTD	Buried
164	N	S, Y		L: 1310830	S1_NTD	Exposed
176	L	F	MHC2: 1309110		S1_NTD	Exposed
183	Q	H, R			S1_NTD	Exposed
213	V	A, G	MHC1: 1075079		S1_NTD	Exposed
214	R	H, L	MHC1: 1075079	C: 1346802	S1_NTD	Exposed
215	D	G, H, Y	MHC1: 1075079	C: 1346802	S1_NTD	Exposed
222	A	S, V	MHC1: 1074981/MHC2: 1310612		S1_NTD	Buried
255	S	C, F, L			S1_NTD	Exposed
256	S	D, F		3-C: 1347910, 1346806, 1347914	S1_NTD	Exposed
257	G	C, D, S, V			S1_NTD	Exposed
259	T	L, S, W		C: 1392002	S1_NTD	Exposed
261	G	C, R, S, V			S1_NTD	Buried
262	A	P, S		C: 1392002	S1_NTD	Exposed
382	V	L	MHC1: 1311170/MHC2: 1310841	3-C: 1338212, 1338213, 1391790	S1_RBD	Buried
440	N	H, I, K, S, Y	MHC2: 1310437	6-C: 1346701, 1392577, 1397231, 1310239, 1334440, 1314091	S1_RBD	Exposed
441	L	I, M, R, V, Y	MHC2: 1310437	7-C: 1311245, 1310987, 1346701, 1310239, 1314090, 1347692, 1334441	S1_RBD	Exposed
442	D	E, F, N, V, Y	MHC2: 1310437	C: 1314090	S1_RBD	Buried
443	S	A, C, F, L, Y	MHC2: 1310437	3-C: 1346701, 1392577, 1397231	S1_RBD	Buried
444	K	F, I, L, M, N, Y	MHC2: 1310437	9-C: 1311244, 1346701, 1392577, 1310989, 1075135, 1329039, 1397231, 1310239, 1392552	S1_RBD	Exposed
477	S	I, N		3-L: 1336532, 1337002, 1314028 /31-C: 1397232, 1310988, 1346816, 1346817, 1311114, 1083498, 1346821, 1347686, 1391789, 1087266, 1346822, 1338212, 1087267, 1311246, 1335410, 1075136, 1347690, 1397483, 1335959, 1311247, 1314088, 1392553, 1392578, 1334440, 1346825, 1338213, 1311248, 1347692, 1392579, 1347695, 1346827	S1_RBD	Exposed
478	T	K		3-L: 1336532, 1337002, 1314028/8-C: 1391788, 1310988, 1346816, 1346817, 1311246, 1334441, 1346808, 1346828	S1_RBD	Exposed
484	E	D, K, Q		3-L: 1336532, 1337002, 1314028/31-C: 1397232, 1338772, 1338779, 1347685, 1087140, 1391788, 1311243, 1310238, 1311244, 1346815, 1334436, 1311114, 1310989, 1075135, 1392552, 1335956, 1335409, 1335410, 1347689, 1335943, 1346824, 1334441, 1346808, 1335961, 1338215, 1347695, 1346810, 1397484, 1346827, 1391796, 1181325	S1_RBD	Exposed
494	S	P	MHC2: 1310412	37-C: 1338772, 1338779, 1347685, 1087140, 1391788, 1311243, 1392577, 1310989, 1075135, 1392552, 1347686, 1347687, 1087266, 1335408, 1335956, 1346823, 1347688, 1346824, 1347690, 1335957, 1335958, 1311247, 1335960, 1392553, 1338213, 1314090, 1311250, 1392579, 1334441, 1346808, 1335961, 1338215, 1346810, 1397484, 1346827, 1391796, 1181325	S1_RBD	Exposed
495	Y	M	MHC2: 1310412	2-L: 1336532, 1337002/22-C: 1338772, 1310988, 1083498, 1346821, 1347687, 1087266, 1346822, 1335408, 1087267, 1335956, 1346823, 1347688, 1335943, 1075136, 1335957, 1335958, 1311247, 1335960, 1392553, 1346825, 1338213, 1311249, 1311250	S1_RBD	Buried
501	N	T, Y		36-C: 1338772, 1087140, 1310988, 1397231, 1346821, 1347686, 1347687, 1391789, 1087266, 1346822, 1338212, 1335408, 1087267, 1311246, 1335956, 1346823, 1347688, 1346824, 1075136, 1347690, 1335957, 1347691, 1335958, 1335959, 1311247, 1314088, 1335960, 1392553, 1346825, 1338213, 1311248, 1311249, 1311250, 1335961, 1346809, 1391795	S1_RBD	Exposed
570	A	D, S, V		3-L: 1073281, 1486834, 1407656	SD1/2 & S1/S2	Buried
583	E	D	MHC1: 1074876	2-L: 1069350, 1519372	SD1/2 & S1/S2	Exposed
613	Q	H		L: 1542872	SD1/2 & S1/S2	Buried
627	D	P		L: 1310729	SD1/2 & S1/S2	#N/A
657	N	S			SD1/2 & S1/S2	Exposed
675	Q	H		2-L: 1069378, 1310304	SD1/2 & S1/S2	Exposed
677	Q	H, R		L: 1310304	SD1/2 & S1/S2	#N/A
678	T	I		L: 1310304	SD1/2 & S1/S2	#N/A
681	P	R, L, H		L: 1310304	SD1/2 & S1/S2	#N/A
688	A	S, V	MHC1: 1326261		S2	#N/A
716	T	I	MHC1: 1318845	3-L: 1541836, 1313229, 1310802	S2	Buried
769	G	A, V	MHC2: 1310863	L: 1312549	S2	Exposed
771	A	S	MHC2: 1310863	L: 1312549	S2	Buried
812	P	L, S	2-MHC2: 1309132, 1070803	2-L: 1313311, 1070803	S2	Exposed
834	I	F, N	MHC2: 1310593		S2	Exposed
845	A	S, V			S2	Exposed
859	T	I, N	MHC2: 1310303		S2	Buried
879	A	S, V	2-MHC2: 1309140, 1069137		S2	Buried
943	S	P, T			S2	Exposed
950	D	H, N			S2	Exposed
1020	A	S, T, V			S2	Exposed
1071	Q	E, H, L			S2	Exposed
1077	T	G			S2	Buried
1078	A	S, T			S2	Buried
1083	H	Q			S2	Exposed
1101	H	D, Y	2-MHC1: 1075025, 1074915	L: 1313627	S2	Exposed
1117	T	I			S2	Exposed
1118	D	H, Y			S2	Exposed
1124	G	C, V			S2	Exposed
1153	D	G, Y			S2	#N/A
1163	D	Y		L: 1388866	S2	#N/A
1176	V	F		L: 1388866	S2	#N/A
1191	K	N		2-L: 1070309, 1313457	S2	#N/A
1219	G	C, V			S2	#N/A
1228	V	I, L	MHC1: 16156		S2	#N/A
1260	D	Y		L: 533643	S2	#N/A
