# Supplementary material for: Circulation and Evolution of SARS-CoV-2 in India: Let the Data Speak
Source: Viruses. 2021 Nov 8;13(11):2238. doi: 10.3390/v13112238 (PMC8619538; doi:10.3390/v13112238)
Supplement: Supplementary file 1 [file viruses-13-02238-s001.zip › Supplementary file 10.xlsx]

## Sheet: significant_var_sites_analyses
Significantly variable site	Amino acid in Wuhan isolate	Substitution sampled in Indian isolates	T cell epitope mapping (MHC class: IEDB Epitope ID)	B cell epitope mapping (L (linear)/ C (conformational): IEDB Epitope ID)	Corresponding spike domain	Accessible surface area (ASA > 25 % : Buried, ASA < 25 % : Exposed
12	S	F		L: 1488606		Signal Peptide
77	K	T/M/R/N		C: 1347912	Exposed	S1_NTD
78	R	M/S	MHC1: 1087399		Exposed	S1_NTD
157	F	(DEL)/S/L		L: 1310830/3-C: 1346803, 1347913, 1346820	Exposed	S1_NTD
218	Q	H/E	MHC1: 1074981/MHC2: 1310612	C: 1346802	Exposed	S1_NTD
341	V	I	2-MHC2: 1310312, 1310886		Buried	S1_RBD
344	A	T	2-MHC2: 1310312, 1310886	3-C: 1311245, 1310987, 1346701	Buried	S1_RBD
417	K	N/T		41-C: 1397232, 1338772, 1310238, 1083498, 1346821, 1347686, 1347687, 1391789, 1087266, 1346822, 1338212, 1335408, 1087267, 1311246, 1335956, 1346823, 1347688, 1335409, 1335410, 1347689, 1335943, 1346824, 1075136, 1347690, 1335957, 1397483, 1347691, 1335958, 1335959, 1311247, 1314088, 1335960, 1392553, 1392578, 1334440, 1346825, 1338213, 1311248, 1347692, 1311250, 1335961,	Buried	S1_RBD
439	N	K/I/T	MHC2: 1310437	3-C: 1392577, 1397231, 1314091	Buried	S1_RBD
445	V	F/I/Y/G/C	MHC2: 1310437	8-C: 1346701, 1392577, 1329039, 1397231, 1310239, 1335956, 1311249, 1334441	Exposed	S1_RBD
446	G	V/A	MHC2: 1309117	19-C: 1338779, 1347685, 1087140, 1391788, 1311243, 1310988, 1311244, 1392577, 1310989, 1075135, 1329039, 1397231, 1310239, 1335956, 1347690, 1311249, 1334441, 1346808, 1335961,	Exposed	S1_RBD
453	Y	F	MHC1: 1313269/2	35-C: 1338772, 1310988, 1310238, 1346821, 1347687, 1087266, 1346822, 1335408, 1087267, 1311246, 1335956, 1346823, 1347688, 1335409, 1335410, 1347689, 1335943, 1346824, 1335957, 1397483, 1335958, 1335959, 1311247, 1314088, 1335960, 1392553, 1392578, 1334440, 1346825, 1338213, 1311248, 1311249, 1311250, 1335961, 1181325,	Buried	S1_RBD
455	L	F	MHC1: 1313269/2	51-C: 1397232, 1310988, 1310238, 1346815, 1346816, 1346817, 1334436, 1311114, 1083498, 1346821, 1347686, 1347687, 1391789, 1087266, 1346822, 1338212, 1335408, 1087267, 1311246, 1335956, 1346823, 1347688, 1335409, 1335410, 1347689, 1335943, 1346824, 1075136, 1335957, 1397483, 1347691, 1335958, 1335959, 1311247, 1314088, 1335960, 1392553, 1392578, 1334440, 1346825, 1338213, 1311248, 1311249, 134769…	Buried	S1_RBD
520	A	S	2-MHC2: 1310747, 1073956	C: 1346826	Buried	S1_RBD
701	A	T/V/S	MHC2: 1310254		Exposed	S2
982	S	A		L: 1310620	Buried	S2
1230	V	M				S2
